# Supplementary material
Source: publisher figshare collection journal article supplement (https://acs.figshare.com/ndownloader/files/8550241)
Supplement: Supplementary file 1 [file 8550241]

 
data_E560 
  
_audit_creation_method            SHELXL-2014/6 
_chemical_name_systematic         ? 
_chemical_name_common             ? 
_chemical_melting_point           ? 
_chemical_formula_moiety          ? 
_chemical_formula_sum 
 'C27 H23 N O3 S' 
_chemical_formula_weight          441.52 
  
loop_ 
 _atom_type_symbol 
 _atom_type_description 
 _atom_type_scat_dispersion_real 
 _atom_type_scat_dispersion_imag 
 _atom_type_scat_source 
 'C'  'C'   0.0033   0.0016 
 'International Tables Vol C Tables 4.2.6.8 and 6.1.1.4' 
 'H'  'H'   0.0000   0.0000 
 'International Tables Vol C Tables 4.2.6.8 and 6.1.1.4' 
 'N'  'N'   0.0061   0.0033 
 'International Tables Vol C Tables 4.2.6.8 and 6.1.1.4' 
 'O'  'O'   0.0106   0.0060 
 'International Tables Vol C Tables 4.2.6.8 and 6.1.1.4' 
 'S'  'S'   0.1246   0.1234 
 'International Tables Vol C Tables 4.2.6.8 and 6.1.1.4' 
  
_space_group_crystal_system       orthorhombic 
_space_group_IT_number            19 
_space_group_name_H-M_alt         'P 21 21 21' 
_space_group_name_Hall            'P 2ac 2ab' 
  
_shelx_space_group_comment 
; 
The symmetry employed for this shelxl refinement is uniquely defined 
by the following loop, which should always be used as a source of 
symmetry information in preference to the above space-group names. 
They are only intended as comments. 
; 
  
loop_ 
 _space_group_symop_operation_xyz 
 'x, y, z' 
 'x+1/2, -y+1/2, -z' 
 '-x, y+1/2, -z+1/2' 
 '-x+1/2, -y, z+1/2' 
  
_cell_length_a                    11.4379(6) 
_cell_length_b                    12.8956(7) 
_cell_length_c                    15.0848(8) 
_cell_angle_alpha                 90 
_cell_angle_beta                  90 
_cell_angle_gamma                 90 
_cell_volume                      2225.0(2) 
_cell_formula_units_Z             4 
_cell_measurement_temperature     100(2) 
_cell_measurement_reflns_used     9914 
_cell_measurement_theta_min       2.23 
_cell_measurement_theta_max       28.34 
  
_exptl_crystal_description        Block 
_exptl_crystal_colour             Colourless 
_exptl_crystal_density_meas       'Not Measured' 
_exptl_crystal_density_method     'Not Measured' 
_exptl_crystal_density_diffrn     1.318 
_exptl_crystal_F_000              928 
_exptl_transmission_factor_min    ? 
_exptl_transmission_factor_max    ? 
_exptl_crystal_size_max           0.450 
_exptl_crystal_size_mid           0.430 
_exptl_crystal_size_min           0.390 
_exptl_absorpt_coefficient_mu     0.175 
_shelx_estimated_absorpt_T_min    0.925 
_shelx_estimated_absorpt_T_max    0.935 
_exptl_absorpt_correction_type    Multi-scan 
_exptl_absorpt_correction_T_min   0.7105 
_exptl_absorpt_correction_T_max   0.7457 
_exptl_absorpt_process_details    'Sadabs, (Sheldrick 2012)'
_exptl_absorpt_special_details    ? 
_diffrn_ambient_temperature       100(2) 
_diffrn_radiation_wavelength      0.71073 
_diffrn_radiation_type            MoK\a 
_diffrn_source                    'Sealed Microfocusing Source'
_diffrn_measurement_device_type   'Bruker D8 Venture' 
_diffrn_measurement_method        '\f and \w scans' 
_diffrn_detector_area_resol_mean  ? 
_diffrn_reflns_number             59136 
_diffrn_reflns_av_unetI/netI      0.0120 
_diffrn_reflns_av_R_equivalents   0.0252 
_diffrn_reflns_limit_h_min        -15 
_diffrn_reflns_limit_h_max        15 
_diffrn_reflns_limit_k_min        -15 
_diffrn_reflns_limit_k_max        17 
_diffrn_reflns_limit_l_min        -20 
_diffrn_reflns_limit_l_max        20 
_diffrn_reflns_theta_min          2.078 
_diffrn_reflns_theta_max          28.282 
_diffrn_reflns_theta_full         25.242 
_diffrn_measured_fraction_theta_max   1.000 
_diffrn_measured_fraction_theta_full  1.000 
_diffrn_reflns_Laue_measured_fraction_max    1.000 
_diffrn_reflns_Laue_measured_fraction_full   1.000 
_diffrn_reflns_point_group_measured_fraction_max   1.000 
_diffrn_reflns_point_group_measured_fraction_full  1.000 
_reflns_number_total              5522 
_reflns_number_gt                 5395 
_reflns_threshold_expression      'I > 2\s(I)' 
_reflns_Friedel_coverage          0.777 
_reflns_Friedel_fraction_max      1.000 
_reflns_Friedel_fraction_full     1.000 
  
_reflns_special_details 
; 
 Reflections were merged by SHELXL according to the crystal 
 class for the calculation of statistics and refinement. 
  
 _reflns_Friedel_fraction is defined as the number of unique 
 Friedel pairs measured divided by the number that would be 
 possible theoretically, ignoring centric projections and 
 systematic absences. 
; 
  
_computing.bruker_data_scaling 	'SADABS V2012/1 (Bruker AXS Inc.)'
_computing.cell_refinement 	'APEX2 v2013.6--2 (Bruker AXS)'
_computing.data_collection 	'APEX2 (Bruker AXS)'
_computing.data_reduction 	'SAINT V8.32B (Bruker AXS Inc., 2013)'
_computing.molecular_graphics 	'Bruker SHELXTL'
_computing.publication_material 'Bruker SHELXTL'
_computing.structure_refinement 'SHELXL--2013 (Sheldrick 2013)'
_computing.structure_solution 	'SHELXS--97 (Sheldrick 2008)'
_refine_special_details           ? 
_refine_ls_structure_factor_coef  Fsqd 
_refine_ls_matrix_type            full 
_refine_ls_weighting_scheme       calc 
_refine_ls_weighting_details 
'w=1/[\s^2^(Fo^2^)+(0.0418P)^2^+0.4220P] where P=(Fo^2^+2Fc^2^)/3' 
_atom_sites_solution_primary      ? 
_atom_sites_solution_secondary    ? 
_atom_sites_solution_hydrogens    geom 
_refine_ls_hydrogen_treatment     constr 
_refine_ls_extinction_method      none 
_refine_ls_extinction_coef        . 
_refine_ls_abs_structure_details 
; 
 Flack x determined using 2339 quotients [(I+)-(I-)]/[(I+)+(I-)] 
 (Parsons, Flack and Wagner, Acta Cryst. B69 (2013) 249-259). 
; 
_refine_ls_abs_structure_Flack    0.019(8) 
_chemical_absolute_configuration  ad 
_refine_ls_number_reflns          5522 
_refine_ls_number_parameters      290 
_refine_ls_number_restraints      0 
_refine_ls_R_factor_all           0.0260 
_refine_ls_R_factor_gt            0.0253 
_refine_ls_wR_factor_ref          0.0669 
_refine_ls_wR_factor_gt           0.0663 
_refine_ls_goodness_of_fit_ref    1.049 
_refine_ls_restrained_S_all       1.049 
_refine_ls_shift/su_max           0.001 
_refine_ls_shift/su_mean          0.000 
  
loop_ 
 _atom_site_label 
 _atom_site_type_symbol 
 _atom_site_fract_x 
 _atom_site_fract_y 
 _atom_site_fract_z 
 _atom_site_U_iso_or_equiv 
 _atom_site_adp_type 
 _atom_site_occupancy 
 _atom_site_site_symmetry_order 
 _atom_site_calc_flag 
 _atom_site_refinement_flags_posn 
 _atom_site_refinement_flags_adp 
 _atom_site_refinement_flags_occupancy 
 _atom_site_disorder_assembly 
 _atom_site_disorder_group 
S1 S 0.31389(3) 0.42910(3) 0.09266(2) 0.01411(8) Uani 1 1 d . . . . . 
O1 O 0.40782(10) 0.35737(9) 0.07739(8) 0.0213(2) Uani 1 1 d . . . . . 
O2 O 0.24364(10) 0.45601(9) 0.01720(7) 0.0200(2) Uani 1 1 d . . . . . 
O3 O 0.08910(10) 0.08076(9) 0.11937(8) 0.0226(2) Uani 1 1 d . . . . . 
N1 N 0.22975(11) 0.38928(9) 0.17839(8) 0.0134(2) Uani 1 1 d . . . . . 
C1 C 0.34103(12) 0.52433(11) 0.24180(10) 0.0144(3) Uani 1 1 d . . . . . 
C2 C 0.37744(14) 0.59986(12) 0.30181(10) 0.0180(3) Uani 1 1 d . . . . . 
H2 H 0.3662 0.5909 0.3637 0.022 Uiso 1 1 calc R U . . . 
C3 C 0.43076(14) 0.68882(12) 0.26866(11) 0.0212(3) Uani 1 1 d . . . . . 
H3 H 0.4551 0.7416 0.3085 0.025 Uiso 1 1 calc R U . . . 
C4 C 0.44910(14) 0.70176(13) 0.17766(12) 0.0225(3) Uani 1 1 d . . . . . 
H4 H 0.4852 0.7634 0.1568 0.027 Uiso 1 1 calc R U . . . 
C5 C 0.41551(13) 0.62629(13) 0.11748(11) 0.0204(3) Uani 1 1 d . . . . . 
H5 H 0.4290 0.6341 0.0557 0.024 Uiso 1 1 calc R U . . . 
C6 C 0.36128(13) 0.53870(11) 0.15157(10) 0.0153(3) Uani 1 1 d . . . . . 
C7 C 0.28087(12) 0.42582(11) 0.25956(9) 0.0142(3) Uani 1 1 d . . . . . 
C8 C 0.27746(13) 0.37345(12) 0.33573(9) 0.0162(3) Uani 1 1 d . . . . . 
H8 H 0.3035 0.4063 0.3885 0.019 Uiso 1 1 calc R U . . . 
C9 C 0.23359(14) 0.26396(11) 0.34010(10) 0.0157(3) Uani 1 1 d . . . . . 
H9 H 0.2899 0.2238 0.3775 0.019 Uiso 1 1 calc R U . . . 
C10 C 0.23695(13) 0.21646(11) 0.24587(9) 0.0151(3) Uani 1 1 d . . . . . 
H10A H 0.3192 0.2051 0.2279 0.018 Uiso 1 1 calc R U . . . 
H10B H 0.1970 0.1484 0.2463 0.018 Uiso 1 1 calc R U . . . 
C11 C 0.17817(13) 0.28685(10) 0.17985(9) 0.0134(3) Uani 1 1 d . . . . . 
C12 C 0.08136(13) 0.26415(11) 0.13341(10) 0.0149(3) Uani 1 1 d . . . . . 
C13 C 0.01604(13) 0.33656(12) 0.07180(10) 0.0174(3) Uani 1 1 d . . . . . 
H13A H 0.0040 0.3008 0.0145 0.021 Uiso 1 1 calc R U . . . 
H13B H 0.0657 0.3980 0.0604 0.021 Uiso 1 1 calc R U . . . 
C14 C -0.10196(13) 0.37355(11) 0.10570(10) 0.0164(3) Uani 1 1 d . . . . . 
C15 C -0.11479(14) 0.40774(11) 0.19294(10) 0.0190(3) Uani 1 1 d . . . . . 
H15 H -0.0491 0.4076 0.2315 0.023 Uiso 1 1 calc R U . . . 
C16 C -0.22237(14) 0.44192(12) 0.22424(10) 0.0213(3) Uani 1 1 d . . . . . 
H16 H -0.2304 0.4629 0.2843 0.026 Uiso 1 1 calc R U . . . 
C17 C -0.31787(15) 0.44543(13) 0.16779(11) 0.0253(3) Uani 1 1 d . . . . . 
H17 H -0.3913 0.4695 0.1889 0.030 Uiso 1 1 calc R U . . . 
C18 C -0.30600(15) 0.41373(15) 0.08023(12) 0.0278(3) Uani 1 1 d . . . . . 
H18 H -0.3711 0.4170 0.0412 0.033 Uiso 1 1 calc R U . . . 
C19 C -0.19879(14) 0.37710(13) 0.04952(11) 0.0228(3) Uani 1 1 d . . . . . 
H19 H -0.1916 0.3544 -0.0101 0.027 Uiso 1 1 calc R U . . . 
C20 C 0.03225(14) 0.15567(12) 0.14157(10) 0.0175(3) Uani 1 1 d . . . . . 
C21 C -0.08915(17) 0.14437(14) 0.17788(16) 0.0345(5) Uani 1 1 d . . . . . 
H21A H -0.1457 0.1707 0.1345 0.052 Uiso 1 1 calc R U . . . 
H21B H -0.0960 0.1840 0.2330 0.052 Uiso 1 1 calc R U . . . 
H21C H -0.1051 0.0710 0.1898 0.052 Uiso 1 1 calc R U . . . 
C22 C 0.11327(14) 0.25214(12) 0.38198(10) 0.0177(3) Uani 1 1 d . . . . . 
C23 C 0.03322(14) 0.33308(12) 0.38552(10) 0.0189(3) Uani 1 1 d . . . . . 
H23 H 0.0556 0.4001 0.3655 0.023 Uiso 1 1 calc R U . . . 
C24 C -0.07973(15) 0.31720(14) 0.41815(10) 0.0229(3) Uani 1 1 d . . . . . 
H24 H -0.1340 0.3730 0.4196 0.027 Uiso 1 1 calc R U . . . 
C25 C -0.11233(16) 0.22044(15) 0.44825(11) 0.0270(4) Uani 1 1 d . . . . . 
H25 H -0.1897 0.2089 0.4689 0.032 Uiso 1 1 calc R U . . . 
C26 C -0.03153(19) 0.13964(14) 0.44827(13) 0.0331(4) Uani 1 1 d . . . . . 
H26 H -0.0531 0.0735 0.4707 0.040 Uiso 1 1 calc R U . . . 
C27 C 0.08103(17) 0.15557(13) 0.41541(12) 0.0280(4) Uani 1 1 d . . . . . 
H27 H 0.1360 0.1003 0.4158 0.034 Uiso 1 1 calc R U . . . 
  
loop_ 
 _atom_site_aniso_label 
 _atom_site_aniso_U_11 
 _atom_site_aniso_U_22 
 _atom_site_aniso_U_33 
 _atom_site_aniso_U_23 
 _atom_site_aniso_U_13 
 _atom_site_aniso_U_12 
S1 0.01239(15) 0.01796(16) 0.01199(14) 0.00019(12) 0.00111(12) -0.00158(13) 
O1 0.0174(5) 0.0248(5) 0.0216(5) -0.0036(4) 0.0038(4) 0.0021(4) 
O2 0.0191(5) 0.0278(6) 0.0131(5) 0.0038(4) -0.0011(4) -0.0051(4) 
O3 0.0251(6) 0.0172(5) 0.0254(5) -0.0038(4) 0.0008(4) 0.0000(5) 
N1 0.0134(5) 0.0154(5) 0.0114(5) 0.0002(4) 0.0008(4) -0.0021(5) 
C1 0.0106(6) 0.0158(6) 0.0169(6) 0.0002(5) 0.0008(5) -0.0004(5) 
C2 0.0160(7) 0.0193(7) 0.0189(7) -0.0021(5) -0.0001(5) -0.0022(6) 
C3 0.0175(7) 0.0191(7) 0.0269(8) -0.0028(6) -0.0009(6) -0.0045(6) 
C4 0.0173(7) 0.0201(7) 0.0301(8) 0.0041(6) 0.0003(6) -0.0067(6) 
C5 0.0158(7) 0.0246(7) 0.0206(7) 0.0049(6) 0.0008(6) -0.0032(6) 
C6 0.0117(6) 0.0173(6) 0.0168(6) -0.0004(5) -0.0011(5) -0.0010(5) 
C7 0.0126(6) 0.0162(6) 0.0138(6) -0.0028(5) 0.0005(5) -0.0007(5) 
C8 0.0171(7) 0.0174(7) 0.0141(6) -0.0013(5) 0.0000(5) -0.0028(5) 
C9 0.0193(7) 0.0151(6) 0.0129(6) 0.0015(5) -0.0013(5) -0.0019(5) 
C10 0.0173(6) 0.0140(6) 0.0141(6) -0.0006(5) -0.0008(5) 0.0015(5) 
C11 0.0145(6) 0.0128(6) 0.0130(6) -0.0004(5) 0.0028(5) -0.0004(5) 
C12 0.0149(6) 0.0145(6) 0.0153(6) -0.0004(5) 0.0021(5) -0.0007(5) 
C13 0.0150(7) 0.0200(7) 0.0173(7) 0.0022(5) -0.0024(5) -0.0022(5) 
C14 0.0155(6) 0.0142(6) 0.0194(7) 0.0016(5) -0.0027(5) -0.0021(5) 
C15 0.0206(7) 0.0170(7) 0.0194(7) 0.0012(5) -0.0064(6) -0.0011(6) 
C16 0.0261(8) 0.0175(7) 0.0202(7) -0.0005(6) -0.0003(6) 0.0012(6) 
C17 0.0197(7) 0.0262(8) 0.0301(8) 0.0013(6) 0.0011(7) 0.0035(7) 
C18 0.0177(7) 0.0388(9) 0.0270(8) -0.0002(7) -0.0071(6) 0.0014(7) 
C19 0.0194(7) 0.0285(8) 0.0204(7) -0.0025(6) -0.0049(6) -0.0017(6) 
C20 0.0182(7) 0.0173(7) 0.0170(7) -0.0010(5) -0.0019(5) -0.0031(6) 
C21 0.0233(9) 0.0175(7) 0.0627(13) -0.0015(8) 0.0140(9) -0.0053(7) 
C22 0.0230(7) 0.0175(6) 0.0127(6) -0.0014(5) 0.0014(5) -0.0039(6) 
C23 0.0212(7) 0.0204(7) 0.0152(7) 0.0030(5) -0.0020(5) -0.0023(6) 
C24 0.0213(7) 0.0308(8) 0.0165(7) 0.0003(6) -0.0019(6) 0.0001(6) 
C25 0.0266(9) 0.0348(9) 0.0198(7) -0.0044(7) 0.0063(6) -0.0101(7) 
C26 0.0441(11) 0.0206(8) 0.0346(10) -0.0036(7) 0.0194(8) -0.0117(8) 
C27 0.0376(9) 0.0164(7) 0.0299(9) -0.0001(6) 0.0145(8) -0.0018(7) 
  
_geom_special_details 
; 
 All esds (except the esd in the dihedral angle between two l.s. planes) 
 are estimated using the full covariance matrix.  The cell esds are taken 
 into account individually in the estimation of esds in distances, angles 
 and torsion angles; correlations between esds in cell parameters are only 
 used when they are defined by crystal symmetry.  An approximate (isotropic) 
 treatment of cell esds is used for estimating esds involving l.s. planes. 
; 
  
loop_ 
 _geom_bond_atom_site_label_1 
 _geom_bond_atom_site_label_2 
 _geom_bond_distance 
 _geom_bond_site_symmetry_2 
 _geom_bond_publ_flag 
S1 O2 1.4358(11) . ? 
S1 O1 1.4363(11) . ? 
S1 N1 1.6918(12) . ? 
S1 C6 1.7553(15) . ? 
O3 C20 1.212(2) . ? 
N1 C7 1.4364(17) . ? 
N1 C11 1.4468(18) . ? 
C1 C6 1.393(2) . ? 
C1 C2 1.393(2) . ? 
C1 C7 1.469(2) . ? 
C2 C3 1.392(2) . ? 
C2 H2 0.9500 . ? 
C3 C4 1.399(2) . ? 
C3 H3 0.9500 . ? 
C4 C5 1.385(2) . ? 
C4 H4 0.9500 . ? 
C5 C6 1.387(2) . ? 
C5 H5 0.9500 . ? 
C7 C8 1.333(2) . ? 
C8 C9 1.500(2) . ? 
C8 H8 0.9500 . ? 
C9 C22 1.522(2) . ? 
C9 C10 1.548(2) . ? 
C9 H9 1.0000 . ? 
C10 C11 1.5059(19) . ? 
C10 H10A 0.9900 . ? 
C10 H10B 0.9900 . ? 
C11 C12 1.343(2) . ? 
C12 C20 1.512(2) . ? 
C12 C13 1.515(2) . ? 
C13 C14 1.520(2) . ? 
C13 H13A 0.9900 . ? 
C13 H13B 0.9900 . ? 
C14 C19 1.395(2) . ? 
C14 C15 1.396(2) . ? 
C15 C16 1.390(2) . ? 
C15 H15 0.9500 . ? 
C16 C17 1.386(2) . ? 
C16 H16 0.9500 . ? 
C17 C18 1.389(2) . ? 
C17 H17 0.9500 . ? 
C18 C19 1.393(2) . ? 
C18 H18 0.9500 . ? 
C19 H19 0.9500 . ? 
C20 C21 1.500(2) . ? 
C21 H21A 0.9800 . ? 
C21 H21B 0.9800 . ? 
C21 H21C 0.9800 . ? 
C22 C23 1.390(2) . ? 
C22 C27 1.393(2) . ? 
C23 C24 1.398(2) . ? 
C23 H23 0.9500 . ? 
C24 C25 1.379(2) . ? 
C24 H24 0.9500 . ? 
C25 C26 1.393(3) . ? 
C25 H25 0.9500 . ? 
C26 C27 1.395(3) . ? 
C26 H26 0.9500 . ? 
C27 H27 0.9500 . ? 
  
loop_ 
 _geom_angle_atom_site_label_1 
 _geom_angle_atom_site_label_2 
 _geom_angle_atom_site_label_3 
 _geom_angle 
 _geom_angle_site_symmetry_1 
 _geom_angle_site_symmetry_3 
 _geom_angle_publ_flag 
O2 S1 O1 116.56(7) . . ? 
O2 S1 N1 111.16(6) . . ? 
O1 S1 N1 110.64(7) . . ? 
O2 S1 C6 112.31(7) . . ? 
O1 S1 C6 111.64(7) . . ? 
N1 S1 C6 91.90(7) . . ? 
C7 N1 C11 116.91(11) . . ? 
C7 N1 S1 108.69(9) . . ? 
C11 N1 S1 121.38(9) . . ? 
C6 C1 C2 119.48(14) . . ? 
C6 C1 C7 111.78(12) . . ? 
C2 C1 C7 128.74(13) . . ? 
C3 C2 C1 118.26(14) . . ? 
C3 C2 H2 120.9 . . ? 
C1 C2 H2 120.9 . . ? 
C2 C3 C4 121.11(15) . . ? 
C2 C3 H3 119.4 . . ? 
C4 C3 H3 119.4 . . ? 
C5 C4 C3 121.18(15) . . ? 
C5 C4 H4 119.4 . . ? 
C3 C4 H4 119.4 . . ? 
C4 C5 C6 116.94(14) . . ? 
C4 C5 H5 121.5 . . ? 
C6 C5 H5 121.5 . . ? 
C5 C6 C1 123.01(14) . . ? 
C5 C6 S1 127.30(12) . . ? 
C1 C6 S1 109.64(11) . . ? 
C8 C7 N1 123.82(13) . . ? 
C8 C7 C1 127.50(13) . . ? 
N1 C7 C1 108.59(12) . . ? 
C7 C8 C9 121.63(13) . . ? 
C7 C8 H8 119.2 . . ? 
C9 C8 H8 119.2 . . ? 
C8 C9 C22 114.52(13) . . ? 
C8 C9 C10 108.89(12) . . ? 
C22 C9 C10 111.34(12) . . ? 
C8 C9 H9 107.3 . . ? 
C22 C9 H9 107.3 . . ? 
C10 C9 H9 107.3 . . ? 
C11 C10 C9 110.96(12) . . ? 
C11 C10 H10A 109.4 . . ? 
C9 C10 H10A 109.4 . . ? 
C11 C10 H10B 109.4 . . ? 
C9 C10 H10B 109.4 . . ? 
H10A C10 H10B 108.0 . . ? 
C12 C11 N1 121.84(13) . . ? 
C12 C11 C10 125.58(13) . . ? 
N1 C11 C10 112.22(12) . . ? 
C11 C12 C20 117.75(13) . . ? 
C11 C12 C13 126.34(13) . . ? 
C20 C12 C13 115.91(13) . . ? 
C12 C13 C14 115.15(12) . . ? 
C12 C13 H13A 108.5 . . ? 
C14 C13 H13A 108.5 . . ? 
C12 C13 H13B 108.5 . . ? 
C14 C13 H13B 108.5 . . ? 
H13A C13 H13B 107.5 . . ? 
C19 C14 C15 118.61(14) . . ? 
C19 C14 C13 120.71(14) . . ? 
C15 C14 C13 120.65(13) . . ? 
C16 C15 C14 120.91(14) . . ? 
C16 C15 H15 119.5 . . ? 
C14 C15 H15 119.5 . . ? 
C17 C16 C15 119.96(14) . . ? 
C17 C16 H16 120.0 . . ? 
C15 C16 H16 120.0 . . ? 
C16 C17 C18 119.84(15) . . ? 
C16 C17 H17 120.1 . . ? 
C18 C17 H17 120.1 . . ? 
C17 C18 C19 120.12(15) . . ? 
C17 C18 H18 119.9 . . ? 
C19 C18 H18 119.9 . . ? 
C18 C19 C14 120.51(15) . . ? 
C18 C19 H19 119.7 . . ? 
C14 C19 H19 119.7 . . ? 
O3 C20 C21 121.36(14) . . ? 
O3 C20 C12 121.03(14) . . ? 
C21 C20 C12 117.61(14) . . ? 
C20 C21 H21A 109.5 . . ? 
C20 C21 H21B 109.5 . . ? 
H21A C21 H21B 109.5 . . ? 
C20 C21 H21C 109.5 . . ? 
H21A C21 H21C 109.5 . . ? 
H21B C21 H21C 109.5 . . ? 
C23 C22 C27 118.89(15) . . ? 
C23 C22 C9 122.45(14) . . ? 
C27 C22 C9 118.63(15) . . ? 
C22 C23 C24 120.84(15) . . ? 
C22 C23 H23 119.6 . . ? 
C24 C23 H23 119.6 . . ? 
C25 C24 C23 119.90(16) . . ? 
C25 C24 H24 120.1 . . ? 
C23 C24 H24 120.1 . . ? 
C24 C25 C26 119.83(16) . . ? 
C24 C25 H25 120.1 . . ? 
C26 C25 H25 120.1 . . ? 
C25 C26 C27 120.15(16) . . ? 
C25 C26 H26 119.9 . . ? 
C27 C26 H26 119.9 . . ? 
C22 C27 C26 120.31(16) . . ? 
C22 C27 H27 119.8 . . ? 
C26 C27 H27 119.8 . . ? 
  
loop_ 
 _geom_torsion_atom_site_label_1 
 _geom_torsion_atom_site_label_2 
 _geom_torsion_atom_site_label_3 
 _geom_torsion_atom_site_label_4 
 _geom_torsion 
 _geom_torsion_site_symmetry_1 
 _geom_torsion_site_symmetry_2 
 _geom_torsion_site_symmetry_3 
 _geom_torsion_site_symmetry_4 
 _geom_torsion_publ_flag 
O2 S1 N1 C7 -143.34(10) . . . . ? 
O1 S1 N1 C7 85.50(11) . . . . ? 
C6 S1 N1 C7 -28.50(10) . . . . ? 
O2 S1 N1 C11 76.67(12) . . . . ? 
O1 S1 N1 C11 -54.49(13) . . . . ? 
C6 S1 N1 C11 -168.49(12) . . . . ? 
C6 C1 C2 C3 1.5(2) . . . . ? 
C7 C1 C2 C3 -178.46(15) . . . . ? 
C1 C2 C3 C4 -0.9(2) . . . . ? 
C2 C3 C4 C5 -0.4(3) . . . . ? 
C3 C4 C5 C6 1.1(2) . . . . ? 
C4 C5 C6 C1 -0.5(2) . . . . ? 
C4 C5 C6 S1 -177.67(12) . . . . ? 
C2 C1 C6 C5 -0.8(2) . . . . ? 
C7 C1 C6 C5 179.18(14) . . . . ? 
C2 C1 C6 S1 176.80(11) . . . . ? 
C7 C1 C6 S1 -3.24(15) . . . . ? 
O2 S1 C6 C5 -50.27(16) . . . . ? 
O1 S1 C6 C5 82.78(15) . . . . ? 
N1 S1 C6 C5 -164.10(14) . . . . ? 
O2 S1 C6 C1 132.27(10) . . . . ? 
O1 S1 C6 C1 -94.68(12) . . . . ? 
N1 S1 C6 C1 18.44(11) . . . . ? 
C11 N1 C7 C8 -3.8(2) . . . . ? 
S1 N1 C7 C8 -145.78(13) . . . . ? 
C11 N1 C7 C1 172.92(12) . . . . ? 
S1 N1 C7 C1 30.90(13) . . . . ? 
C6 C1 C7 C8 159.13(15) . . . . ? 
C2 C1 C7 C8 -20.9(3) . . . . ? 
C6 C1 C7 N1 -17.40(17) . . . . ? 
C2 C1 C7 N1 162.56(14) . . . . ? 
N1 C7 C8 C9 8.6(2) . . . . ? 
C1 C7 C8 C9 -167.41(14) . . . . ? 
C7 C8 C9 C22 -106.29(16) . . . . ? 
C7 C8 C9 C10 19.1(2) . . . . ? 
C8 C9 C10 C11 -50.43(16) . . . . ? 
C22 C9 C10 C11 76.77(15) . . . . ? 
C7 N1 C11 C12 144.05(14) . . . . ? 
S1 N1 C11 C12 -79.02(16) . . . . ? 
C7 N1 C11 C10 -29.43(17) . . . . ? 
S1 N1 C11 C10 107.49(12) . . . . ? 
C9 C10 C11 C12 -116.31(16) . . . . ? 
C9 C10 C11 N1 56.88(15) . . . . ? 
N1 C11 C12 C20 -178.19(13) . . . . ? 
C10 C11 C12 C20 -5.6(2) . . . . ? 
N1 C11 C12 C13 2.7(2) . . . . ? 
C10 C11 C12 C13 175.25(14) . . . . ? 
C11 C12 C13 C14 -108.93(17) . . . . ? 
C20 C12 C13 C14 71.92(17) . . . . ? 
C12 C13 C14 C19 -136.81(15) . . . . ? 
C12 C13 C14 C15 45.22(19) . . . . ? 
C19 C14 C15 C16 1.8(2) . . . . ? 
C13 C14 C15 C16 179.82(14) . . . . ? 
C14 C15 C16 C17 -2.0(2) . . . . ? 
C15 C16 C17 C18 0.6(2) . . . . ? 
C16 C17 C18 C19 0.9(3) . . . . ? 
C17 C18 C19 C14 -1.1(3) . . . . ? 
C15 C14 C19 C18 -0.2(2) . . . . ? 
C13 C14 C19 C18 -178.24(15) . . . . ? 
C11 C12 C20 O3 -61.3(2) . . . . ? 
C13 C12 C20 O3 117.96(16) . . . . ? 
C11 C12 C20 C21 118.86(17) . . . . ? 
C13 C12 C20 C21 -61.9(2) . . . . ? 
C8 C9 C22 C23 22.8(2) . . . . ? 
C10 C9 C22 C23 -101.27(16) . . . . ? 
C8 C9 C22 C27 -159.30(15) . . . . ? 
C10 C9 C22 C27 76.63(17) . . . . ? 
C27 C22 C23 C24 -3.0(2) . . . . ? 
C9 C22 C23 C24 174.91(14) . . . . ? 
C22 C23 C24 C25 0.7(2) . . . . ? 
C23 C24 C25 C26 1.8(3) . . . . ? 
C24 C25 C26 C27 -2.0(3) . . . . ? 
C23 C22 C27 C26 2.8(3) . . . . ? 
C9 C22 C27 C26 -175.22(16) . . . . ? 
C25 C26 C27 C22 -0.3(3) . . . . ? 
  
_refine_diff_density_max    0.269 
_refine_diff_density_min   -0.217 
_refine_diff_density_rms    0.040 
  
_shelxl_version_number 2014/6 
  
_shelx_res_file 
; 
TITL E560 in P2(1)2(1)2(1) 
CELL 0.71073 11.4379 12.8956 15.0848 90.000 90.000 90.000 
ZERR 4.00 0.0006 0.0007 0.0008 0.000 0.000 0.000 
LATT -1 
SYMM x+1/2, -y+1/2, -z 
SYMM -x, y+1/2, -z+1/2 
SYMM -x+1/2, -y, z+1/2 
SFAC C  H  N  O  S 
UNIT 108 92  4  12 4 
L.S. 10 
SHEL 9999 0.75 
ACTA 
BOND $H 
FMAP 2 
PLAN 20 
SIZE 0.45 0.43 0.39 
CONF 
TEMP -173.150 
WGHT    0.041800    0.422000 
FVAR       0.18843 
S1    5    0.313888    0.429103    0.092658    11.00000    0.01239    0.01796 = 
         0.01199    0.00019    0.00111   -0.00158 
O1    4    0.407820    0.357368    0.077395    11.00000    0.01743    0.02476 = 
         0.02163   -0.00363    0.00379    0.00215 
O2    4    0.243645    0.456006    0.017201    11.00000    0.01914    0.02781 = 
         0.01311    0.00378   -0.00109   -0.00506 
O3    4    0.089101    0.080765    0.119365    11.00000    0.02511    0.01720 = 
         0.02539   -0.00384    0.00077    0.00003 
N1    3    0.229753    0.389277    0.178385    11.00000    0.01342    0.01545 = 
         0.01145    0.00024    0.00078   -0.00208 
C1    1    0.341027    0.524330    0.241798    11.00000    0.01058    0.01576 = 
         0.01693    0.00025    0.00076   -0.00037 
C2    1    0.377438    0.599860    0.301815    11.00000    0.01596    0.01927 = 
         0.01888   -0.00206   -0.00015   -0.00219 
AFIX  43 
H2    2    0.366172    0.590884    0.363736    11.00000   -1.20000 
AFIX   0 
C3    1    0.430757    0.688821    0.268655    11.00000    0.01749    0.01906 = 
         0.02690   -0.00283   -0.00093   -0.00445 
AFIX  43 
H3    2    0.455089    0.741623    0.308508    11.00000   -1.20000 
AFIX   0 
C4    1    0.449102    0.701762    0.177663    11.00000    0.01725    0.02012 = 
         0.03012    0.00414    0.00029   -0.00670 
AFIX  43 
H4    2    0.485249    0.763412    0.156750    11.00000   -1.20000 
AFIX   0 
C5    1    0.415505    0.626287    0.117482    11.00000    0.01584    0.02463 = 
         0.02063    0.00487    0.00081   -0.00322 
AFIX  43 
H5    2    0.428980    0.634144    0.055703    11.00000   -1.20000 
AFIX   0 
C6    1    0.361280    0.538703    0.151565    11.00000    0.01167    0.01732 = 
         0.01677   -0.00039   -0.00115   -0.00101 
C7    1    0.280872    0.425821    0.259557    11.00000    0.01262    0.01616 = 
         0.01379   -0.00283    0.00045   -0.00069 
C8    1    0.277457    0.373453    0.335734    11.00000    0.01706    0.01737 = 
         0.01406   -0.00131    0.00001   -0.00276 
AFIX  43 
H8    2    0.303450    0.406306    0.388544    11.00000   -1.20000 
AFIX   0 
C9    1    0.233590    0.263955    0.340102    11.00000    0.01928    0.01505 = 
         0.01289    0.00148   -0.00127   -0.00185 
AFIX  13 
H9    2    0.289888    0.223820    0.377454    11.00000   -1.20000 
AFIX   0 
C10   1    0.236949    0.216464    0.245873    11.00000    0.01728    0.01402 = 
         0.01409   -0.00057   -0.00083    0.00145 
AFIX  23 
H10A  2    0.319220    0.205100    0.227945    11.00000   -1.20000 
H10B  2    0.196967    0.148377    0.246332    11.00000   -1.20000 
AFIX   0 
C11   1    0.178166    0.286848    0.179848    11.00000    0.01447    0.01278 = 
         0.01295   -0.00039    0.00276   -0.00044 
C12   1    0.081358    0.264145    0.133411    11.00000    0.01490    0.01446 = 
         0.01532   -0.00041    0.00210   -0.00072 
C13   1    0.016040    0.336564    0.071803    11.00000    0.01497    0.01995 = 
         0.01727    0.00219   -0.00240   -0.00220 
AFIX  23 
H13A  2    0.004029    0.300768    0.014464    11.00000   -1.20000 
H13B  2    0.065717    0.397995    0.060385    11.00000   -1.20000 
AFIX   0 
C14   1   -0.101955    0.373552    0.105702    11.00000    0.01553    0.01417 = 
         0.01939    0.00164   -0.00274   -0.00207 
C15   1   -0.114788    0.407738    0.192937    11.00000    0.02059    0.01699 = 
         0.01936    0.00120   -0.00641   -0.00106 
AFIX  43 
H15   2   -0.049078    0.407640    0.231456    11.00000   -1.20000 
AFIX   0 
C16   1   -0.222370    0.441924    0.224240    11.00000    0.02612    0.01749 = 
         0.02022   -0.00048   -0.00030    0.00121 
AFIX  43 
H16   2   -0.230436    0.462878    0.284305    11.00000   -1.20000 
AFIX   0 
C17   1   -0.317871    0.445431    0.167786    11.00000    0.01966    0.02619 = 
         0.03006    0.00127    0.00107    0.00347 
AFIX  43 
H17   2   -0.391281    0.469454    0.188908    11.00000   -1.20000 
AFIX   0 
C18   1   -0.305996    0.413729    0.080226    11.00000    0.01772    0.03883 = 
         0.02697   -0.00021   -0.00706    0.00137 
AFIX  43 
H18   2   -0.371095    0.417032    0.041217    11.00000   -1.20000 
AFIX   0 
C19   1   -0.198791    0.377101    0.049518    11.00000    0.01938    0.02850 = 
         0.02041   -0.00254   -0.00494   -0.00171 
AFIX  43 
H19   2   -0.191564    0.354366   -0.010134    11.00000   -1.20000 
AFIX   0 
C20   1    0.032247    0.155671    0.141572    11.00000    0.01815    0.01729 = 
         0.01704   -0.00104   -0.00190   -0.00310 
C21   1   -0.089153    0.144367    0.177876    11.00000    0.02334    0.01753 = 
         0.06272   -0.00146    0.01405   -0.00531 
AFIX 137 
H21A  2   -0.145662    0.170669    0.134526    11.00000   -1.50000 
H21B  2   -0.095998    0.184033    0.233047    11.00000   -1.50000 
H21C  2   -0.105128    0.071014    0.189777    11.00000   -1.50000 
AFIX   0 
C22   1    0.113273    0.252135    0.381976    11.00000    0.02299    0.01750 = 
         0.01273   -0.00139    0.00145   -0.00395 
C23   1    0.033222    0.333079    0.385517    11.00000    0.02120    0.02040 = 
         0.01520    0.00298   -0.00202   -0.00234 
AFIX  43 
H23   2    0.055552    0.400061    0.365503    11.00000   -1.20000 
AFIX   0 
C24   1   -0.079730    0.317201    0.418151    11.00000    0.02127    0.03079 = 
         0.01650    0.00030   -0.00186    0.00010 
AFIX  43 
H24   2   -0.133964    0.372970    0.419600    11.00000   -1.20000 
AFIX   0 
C25   1   -0.112335    0.220437    0.448247    11.00000    0.02655    0.03476 = 
         0.01979   -0.00443    0.00628   -0.01007 
AFIX  43 
H25   2   -0.189714    0.208926    0.468909    11.00000   -1.20000 
AFIX   0 
C26   1   -0.031531    0.139644    0.448270    11.00000    0.04413    0.02058 = 
         0.03463   -0.00357    0.01939   -0.01170 
AFIX  43 
H26   2   -0.053128    0.073533    0.470718    11.00000   -1.20000 
AFIX   0 
C27   1    0.081027    0.155575    0.415408    11.00000    0.03763    0.01640 = 
         0.02988   -0.00010    0.01451   -0.00180 
AFIX  43 
H27   2    0.135960    0.100322    0.415826    11.00000   -1.20000 
AFIX   0 
HKLF 4 1 1 0 0 0 1 0 0 0 1 
  
REM  E560 in P2(1)2(1)2(1) 
REM R1 =  0.0253 for    5395 Fo > 4sig(Fo)  and  0.0260 for all    5522 data 
REM    290 parameters refined using      0 restraints 
  
END 
  
WGHT      0.0418      0.4210 
  
REM Highest difference peak  0.269,  deepest hole -0.217,  1-sigma level  0.040 
Q1    1   0.3100  0.4804  0.2543  11.00000  0.05    0.27 
Q2    1   0.0811  0.2942  0.3980  11.00000  0.05    0.23 
Q3    1   0.2522  0.3190  0.3357  11.00000  0.05    0.23 
Q4    1   0.2430  0.4113  0.2212  11.00000  0.05    0.23 
Q5    1   0.0551  0.2116  0.1383  11.00000  0.05    0.22 
Q6    1   0.2036  0.2530  0.2138  11.00000  0.05    0.22 
Q7    1   0.3529  0.5623  0.2707  11.00000  0.05    0.22 
Q8    1   0.3924  0.5799  0.1389  11.00000  0.05    0.21 
Q9    1   0.2346  0.2444  0.2941  11.00000  0.05    0.21 
Q10   1  -0.0237  0.3217  0.3991  11.00000  0.05    0.20 
Q11   1  -0.0448  0.3567  0.0903  11.00000  0.05    0.20 
Q12   1   0.3567  0.5386  0.1958  11.00000  0.05    0.20 
Q13   1   0.0514  0.3062  0.1025  11.00000  0.05    0.20 
Q14   1  -0.3067  0.4356  0.1238  11.00000  0.05    0.20 
Q15   1  -0.2541  0.3806  0.0734  11.00000  0.05    0.20 
Q16   1   0.4146  0.6423  0.2812  11.00000  0.05    0.20 
Q17   1   0.0211  0.1577  0.4406  11.00000  0.05    0.20 
Q18   1   0.2992  0.3955  0.2917  11.00000  0.05    0.19 
Q19   1   0.1722  0.2598  0.3644  11.00000  0.05    0.19 
Q20   1   0.1011  0.2113  0.4061  11.00000  0.05    0.19 
; 
_shelx_res_checksum   30376 
  
_shelx_hkl_file 
; 
   0  -2   0   45.10    1.05 
   0   2   0   43.64    1.05 
   0   2   0   44.70    1.04 
   0  -3   0    0.08    0.02 
   0   3   0    0.01    0.02 
   0   3   0   -0.02    0.01 
   0   3   0    0.01    0.02 
   0   4   0  561.11   13.55 
   0   4   0  598.45   13.41 
   0   4   0  575.83   13.39 
   0  -4   0  562.93   13.49 
   0   5   0    0.05    0.04 
   0  -5   0    0.10    0.04 
   0   5   0    0.07    0.03 
   0   5   0    0.03    0.02 
   0   6   0  189.52    4.45 
   0   6   0  193.66    4.46 
   0   6   0  188.32    4.51 
   0   6   0  191.43    4.45 
   0   6   0  195.63    4.47 
   0   7   0    0.07    0.02 
   0   7   0    0.09    0.04 
   0   7   0    0.04    0.04 
   0   7   0    0.06    0.06 
   0   8   0   10.70    0.38 
   0   8   0   10.94    0.29 
   0   8   0   10.66    0.28 
   0   8   0   10.57    0.28 
   0   8   0   10.94    0.30 
   0   9   0    0.05    0.04 
   0   9   0    0.07    0.09 
   0   9   0    0.07    0.03 
   0   9   0    0.00    0.04 
   0   9   0    0.00    0.04 
   0   9   0    0.20    0.12 
   0  10   0   43.87    1.06 
   0  10   0   43.57    1.22 
   0  10   0   44.09    1.04 
   0  10   0   43.76    1.18 
   0  10   0   43.36    1.05 
   0  10   0   43.36    1.06 
   0  11   0    0.51    0.14 
   0  11   0    0.32    0.07 
   0  11   0    0.33    0.16 
   0  11   0    0.32    0.05 
   0  11   0    0.39    0.07 
   0  11   0    0.26    0.04 
   0  12   0    0.83    0.20 
   0  12   0    0.66    0.09 
   0  12   0    0.81    0.17 
   0  12   0    0.61    0.10 
   0  13   0    0.42    0.10 
   0  13   0    0.36    0.11 
   0  13   0    0.64    0.33 
   0  13   0    0.51    0.19 
   0  14   0   22.84    0.66 
   0  14   0   22.55    0.64 
   0  14   0   23.19    0.82 
   0  14   0   22.49    0.84 
   0  15   0    0.26    0.25 
   0  15   0    0.25    0.26 
   0  15   0    0.11    0.16 
   0  16   0    0.09    0.19 
   0  16   0    0.25    0.28 
   0  16   0    0.09    0.30 
   0  16   0    0.19    0.15 
   0  17   0    0.47    0.38 
   0  17   0    0.08    0.18 
   0  17   0   -0.16    0.34 
   1  -1   0  328.84    8.15 
   1  -1   0  313.71    8.18 
   1   1   0  372.53    8.10 
   1   1   0  367.47    8.04 
  -1   1   0  357.98    8.13 
  -1   1   0  327.01    8.16 
  -1   1   0  356.14    8.18 
   1  -2   0    4.67    0.13 
   1   2   0    4.46    0.11 
  -1   2   0    4.34    0.13 
  -1   2   0    4.56    0.13 
  -1  -2   0    4.51    0.11 
  -1   2   0    4.48    0.14 
  -1  -2   0    4.50    0.12 
  -1   2   0    4.45    0.15 
  -1   2   0    4.42    0.14 
   1   3   0    2.99    0.09 
   1  -3   0    3.00    0.09 
   1  -3   0    2.71    0.09 
  -1   3   0    2.92    0.10 
  -1   3   0    2.95    0.11 
  -1   3   0    2.82    0.10 
  -1   3   0    2.70    0.11 
   1  -4   0   89.88    2.09 
   1  -4   0   87.49    2.14 
   1   4   0   88.77    2.12 
  -1   4   0   92.08    2.11 
  -1   4   0   89.31    2.12 
  -1   4   0   92.27    2.13 
  -1   4   0   92.96    2.11 
  -1   4   0   86.43    2.15 
   1  -5   0    1.19    0.09 
   1   5   0    1.18    0.09 
  -1   5   0    1.30    0.07 
  -1   5   0    1.25    0.09 
  -1   5   0    1.35    0.07 
  -1   5   0    1.28    0.08 
  -1   5   0    1.33    0.11 
   1  -6   0   35.38    0.88 
   1   6   0   32.82    0.87 
  -1   6   0   33.98    0.86 
  -1   6   0   34.17    0.83 
  -1   6   0   32.99    0.89 
  -1   6   0   34.82    0.85 
  -1   6   0   34.65    0.83 
   1  -7   0   13.53    0.41 
   1   7   0   13.16    0.41 
   1   7   0   13.23    0.44 
  -1   7   0   13.66    0.36 
  -1   7   0   13.43    0.36 
  -1   7   0   12.76    0.43 
  -1   7   0   13.27    0.38 
  -1   7   0   13.39    0.37 
   1   8   0    9.84    0.38 
   1   8   0    9.74    0.35 
   1  -8   0   10.57    0.35 
  -1   8   0   10.14    0.29 
  -1   8   0    9.95    0.37 
  -1   8   0   10.54    0.30 
  -1   8   0   10.02    0.30 
  -1   8   0   10.19    0.32 
   1   9   0    0.95    0.13 
   1   9   0    0.85    0.14 
   1  -9   0    0.86    0.12 
  -1   9   0    0.59    0.12 
  -1   9   0    0.76    0.08 
  -1   9   0    0.79    0.09 
  -1   9   0    0.61    0.14 
  -1   9   0    0.79    0.08 
  -1   9   0    0.59    0.08 
   1  10   0   14.12    0.49 
   1  10   0   14.30    0.53 
  -1  10   0   14.09    0.55 
  -1  10   0   14.18    0.51 
  -1  10   0   14.30    0.41 
  -1  10   0   13.97    0.40 
  -1  10   0   14.21    0.41 
  -1  10   0   13.24    0.43 
   1  11   0    9.78    0.27 
   1  11   0    9.78    0.27 
   1  11   0    9.34    0.41 
   1  11   0   10.32    0.45 
  -1  11   0    9.80    0.44 
  -1  11   0    9.45    0.32 
  -1  11   0    9.90    0.33 
  -1  11   0   10.04    0.30 
  -1  11   0    9.93    0.31 
  -1  11   0   10.08    0.47 
   1  12   0   75.17    1.95 
   1  12   0   76.13    1.78 
   1  12   0   74.52    1.99 
   1  12   0   75.88    1.85 
   1  12   0   73.89    1.79 
  -1  12   0   76.52    1.98 
  -1  12   0   75.26    1.84 
  -1  12   0   76.51    1.84 
  -1  12   0   77.19    1.81 
  -1  12   0   77.17    1.79 
  -1  12   0   68.11    2.18 
   1  13   0    1.53    0.17 
   1  13   0    1.80    0.15 
   1  13   0    1.58    0.14 
   1  13   0    1.96    0.24 
  -1  13   0    1.53    0.13 
  -1  13   0    1.50    0.26 
  -1  13   0    2.21    0.20 
  -1  13   0    1.63    0.17 
  -1  13   0    1.76    0.11 
  -1  13   0    1.38    0.23 
   1  14   0    2.36    0.29 
   1  14   0    2.20    0.20 
   1  14   0    2.48    0.18 
   1  14   0    2.10    0.21 
   1  14   0    2.67    0.29 
  -1  14   0    2.19    0.11 
  -1  14   0    2.32    0.12 
  -1  14   0    2.53    0.30 
  -1  14   0    2.40    0.23 
  -1  14   0    2.26    0.21 
  -1  14   0    2.11    0.29 
   1  15   0    0.27    0.14 
   1  15   0    0.10    0.23 
   1  15   0    0.35    0.25 
   1  15   0    0.44    0.14 
  -1  15   0    0.42    0.26 
  -1  15   0   -0.02    0.24 
  -1  15   0    0.33    0.17 
   1  16   0   25.32    0.98 
   1  16   0   23.81    0.72 
   1  16   0   23.36    0.73 
   1  16   0   22.80    0.93 
  -1  16   0   23.58    0.95 
  -1  16   0   23.53    1.00 
  -1  16   0   24.23    0.78 
   1  17   0    0.38    0.37 
   1  17   0    0.10    0.19 
   1  17   0    0.62    0.35 
  -1  17   0    0.29    0.38 
  -1  17   0    0.30    0.36 
  -1  17   0    0.03    0.19 
   2   0   0  137.88    3.08 
   2   0   0  134.36    3.10 
   2   0   0  129.76    3.03 
   2   0   0  138.06    3.12 
  -2   0   0  131.08    3.04 
  -2   0   0  125.22    3.03 
  -2   0   0  114.22    3.06 
  -2   0   0  129.89    3.05 
   2  -1   0   43.52    1.08 
   2  -1   0   46.11    1.08 
   2  -1   0   45.51    1.08 
   2   1   0   46.11    1.08 
   2  -1   0   44.67    1.08 
   2   1   0   44.51    1.07 
   2   1   0   46.53    1.07 
  -2  -1   0   41.71    1.08 
  -2   1   0   45.02    1.08 
  -2  -1   0   46.09    1.08 
  -2   1   0   43.92    1.09 
  -2  -1   0   44.98    1.07 
  -2   1   0   44.32    1.08 
  -2   1   0   45.18    1.08 
  -2   1   0   44.91    1.09 
  -2   1   0   46.15    1.08 
   2   2   0  601.50   13.66 
   2   2   0  603.77   13.76 
   2  -2   0  577.69   13.85 
   2  -2   0  593.03   13.84 
   2   2   0  580.55   13.75 
   2  -2   0  589.06   13.84 
  -2   2   0  579.25   13.79 
  -2   2   0  597.97   13.94 
  -2  -2   0  586.73   13.76 
  -2   2   0  573.25   13.89 
  -2   2   0  575.20   13.81 
  -2   2   0  575.12   13.83 
  -2  -2   0  606.49   13.76 
  -2   2   0  595.66   13.89 
   2  -3   0   51.17    1.21 
   2  -3   0   51.98    1.21 
   2   3   0   50.49    1.20 
   2  -3   0   47.90    1.23 
   2   3   0   50.41    1.21 
  -2   3   0   49.57    1.24 
  -2  -3   0   51.72    1.19 
  -2  -3   0   50.71    1.19 
  -2  -3   0   50.78    1.19 
  -2   3   0   49.48    1.24 
  -2   3   0   50.64    1.22 
  -2   3   0   51.85    1.24 
  -2   3   0   49.87    1.22 
   2   4   0   97.42    2.31 
   2   4   0   99.01    2.33 
   2  -4   0  100.81    2.36 
   2  -4   0   97.95    2.31 
   2  -4   0   99.57    2.31 
  -2   4   0   97.11    2.33 
  -2   4   0   96.87    2.35 
  -2  -4   0   98.68    2.29 
  -2  -4   0   97.50    2.29 
  -2   4   0   99.70    2.33 
  -2   4   0   96.90    2.36 
  -2   4   0  100.89    2.35 
   2   5   0  136.36    3.16 
   2  -5   0  135.99    3.11 
   2   5   0  133.48    3.12 
   2  -5   0  129.95    3.18 
   2  -5   0  132.27    3.11 
  -2   5   0  131.56    3.19 
  -2   5   0  136.13    3.14 
  -2   5   0  132.96    3.17 
  -2   5   0  136.92    3.15 
  -2   5   0  130.66    3.16 
   2  -6   0  449.24   10.46 
   2   6   0  456.78   10.51 
   2   6   0  439.84   10.52 
   2   6   0  446.67   10.62 
   2  -6   0  448.31   10.48 
  -2   6   0  453.97   10.62 
  -2   6   0  455.45   10.60 
  -2   6   0  438.66   10.58 
  -2   6   0  460.89   10.65 
  -2   6   0  450.04   10.60 
   2   7   0    1.98    0.10 
   2   7   0    1.80    0.13 
   2  -7   0    2.01    0.15 
   2   7   0    2.28    0.16 
  -2   7   0    1.81    0.16 
  -2   7   0    1.90    0.11 
  -2   7   0    1.98    0.13 
  -2   7   0    1.84    0.12 
  -2   7   0    1.94    0.14 
   2   8   0   11.52    0.38 
   2   8   0   11.79    0.34 
   2   8   0   11.68    0.41 
   2  -8   0   12.26    0.40 
  -2   8   0   11.33    0.38 
  -2   8   0   11.85    0.36 
  -2   8   0   11.39    0.42 
  -2   8   0   11.48    0.35 
  -2   8   0   11.57    0.36 
   2   9   0    1.90    0.17 
   2  -9   0    2.17    0.17 
   2   9   0    1.95    0.20 
   2   9   0    1.79    0.12 
  -2   9   0    1.74    0.14 
  -2   9   0    1.90    0.14 
  -2   9   0    2.13    0.15 
  -2   9   0    1.83    0.16 
  -2   9   0    1.68    0.20 
   2  10   0    0.38    0.12 
   2  10   0    0.55    0.08 
   2 -10   0    0.54    0.11 
   2  10   0    0.40    0.13 
  -2  10   0    0.57    0.16 
  -2  10   0    0.53    0.08 
  -2  10   0    0.51    0.11 
  -2  10   0    0.58    0.14 
  -2  10   0    0.33    0.09 
  -2  10   0    0.33    0.08 
   2  11   0    8.61    0.41 
   2 -11   0    8.59    0.38 
   2  11   0    8.94    0.30 
   2  11   0    8.62    0.38 
  -2  11   0    8.75    0.32 
  -2  11   0    9.05    0.43 
  -2  11   0    8.84    0.34 
  -2  11   0    9.00    0.30 
  -2  11   0    8.56    0.46 
  -2  11   0    8.67    0.33 
   2  12   0   14.80    0.59 
   2  12   0   15.50    0.57 
   2  12   0   15.43    0.47 
  -2  12   0   16.63    0.50 
  -2  12   0   14.48    0.65 
  -2  12   0   15.71    0.46 
  -2  12   0   16.05    0.48 
  -2  12   0   14.80    0.66 
  -2  12   0   16.19    0.51 
   2  13   0   30.76    0.83 
   2  13   0   30.75    0.97 
   2  13   0   30.36    0.94 
   2  13   0   29.90    0.74 
  -2  13   0   30.11    1.03 
  -2  13   0   31.08    0.80 
  -2  13   0   30.30    0.81 
  -2  13   0   30.84    0.85 
  -2  13   0   30.66    0.99 
  -2  13   0   30.53    0.86 
   2  14   0    2.90    0.31 
   2  14   0    2.33    0.16 
   2  14   0    2.32    0.22 
   2  14   0    2.84    0.29 
  -2  14   0    2.57    0.17 
  -2  14   0    2.54    0.35 
  -2  14   0    2.80    0.27 
  -2  14   0    2.84    0.33 
  -2  14   0    2.42    0.19 
  -2  14   0    2.63    0.31 
   2  15   0    1.24    0.16 
   2  15   0    1.27    0.27 
   2  15   0    1.65    0.31 
   2  15   0    1.37    0.14 
  -2  15   0    1.19    0.23 
  -2  15   0    1.03    0.30 
  -2  15   0    1.41    0.33 
  -2  15   0    1.35    0.15 
   2  16   0    5.54    0.56 
   2  16   0    6.45    0.60 
   2  16   0    5.99    0.42 
  -2  16   0    6.33    0.48 
  -2  16   0    6.15    0.64 
  -2  16   0    5.97    0.61 
  -2  16   0    4.78    0.52 
   2  17   0    9.16    0.46 
   2  17   0    9.00    0.73 
   2  17   0    9.62    0.75 
  -2  17   0    9.25    0.79 
  -2  17   0    9.59    0.66 
  -2  17   0   10.45    0.80 
   3   0   0    0.03    0.03 
   3   0   0   -0.01    0.02 
   3   0   0    0.01    0.03 
  -3   0   0    0.01    0.03 
  -3   0   0    0.08    0.03 
  -3   0   0    0.06    0.03 
  -3   0   0   -0.02    0.03 
   3   1   0    9.01    0.25 
   3  -1   0    9.29    0.27 
   3   1   0    8.79    0.26 
   3  -1   0    8.85    0.27 
   3  -1   0    8.55    0.26 
   3  -1   0    8.70    0.26 
  -3   1   0    8.97    0.28 
  -3   1   0    8.72    0.27 
  -3  -1   0    9.07    0.26 
  -3   1   0    8.95    0.27 
  -3  -1   0    8.87    0.27 
  -3   1   0    9.08    0.26 
  -3   1   0    8.77    0.26 
  -3   1   0    8.86    0.28 
  -3  -1   0    8.38    0.27 
   3  -2   0   31.03    0.76 
   3   2   0   29.92    0.74 
   3  -2   0   29.77    0.75 
   3  -2   0   30.07    0.75 
  -3   2   0   29.01    0.77 
  -3  -2   0   30.36    0.75 
  -3   2   0   27.93    0.77 
  -3   2   0   27.92    0.75 
  -3   2   0   30.99    0.76 
  -3   2   0   28.84    0.75 
  -3  -2   0   30.31    0.73 
  -3   2   0   30.66    0.76 
  -3  -2   0   30.26    0.75 
   3   3   0  130.03    2.96 
   3  -3   0  126.49    2.99 
   3   3   0  126.43    2.98 
   3  -3   0  130.27    3.02 
   3  -3   0  129.42    3.00 
  -3   3   0  126.49    3.03 
  -3   3   0  131.31    3.02 
  -3   3   0  122.33    3.02 
  -3   3   0  123.64    3.02 
  -3   3   0  124.24    3.00 
  -3  -3   0  129.07    2.98 
  -3   3   0  123.79    3.00 
  -3  -3   0  128.25    2.97 
   3   4   0    5.62    0.18 
   3  -4   0    5.76    0.19 
   3   4   0    5.43    0.17 
   3  -4   0    5.31    0.19 
  -3  -4   0    5.32    0.17 
  -3  -4   0    5.34    0.16 
  -3   4   0    5.61    0.22 
  -3  -4   0    5.25    0.17 
  -3   4   0    5.46    0.21 
  -3   4   0    5.37    0.22 
  -3   4   0    5.44    0.22 
  -3   4   0    5.51    0.21 
  -3   4   0    5.64    0.20 
   3  -5   0  137.70    3.22 
   3  -5   0  137.27    3.16 
   3  -5   0  131.85    3.16 
   3   5   0  137.29    3.17 
   3   5   0  134.26    3.16 
  -3  -5   0  132.04    3.15 
  -3   5   0  133.51    3.19 
  -3   5   0  134.29    3.19 
  -3   5   0  130.19    3.21 
  -3  -5   0  136.51    3.13 
  -3  -5   0  137.11    3.13 
  -3   5   0  133.70    3.21 
  -3   5   0  133.54    3.22 
   3  -6   0   22.59    0.66 
   3   6   0   23.18    0.62 
   3  -6   0   23.65    0.59 
   3   6   0   23.51    0.60 
   3  -6   0   23.17    0.59 
  -3   6   0   22.94    0.66 
  -3   6   0   23.49    0.65 
  -3   6   0   23.33    0.63 
  -3   6   0   23.86    0.63 
  -3   6   0   23.27    0.67 
   3  -7   0   12.47    0.34 
   3  -7   0   12.68    0.34 
   3   7   0   12.58    0.36 
   3  -7   0   13.17    0.43 
   3   7   0   12.99    0.40 
  -3   7   0   12.54    0.42 
  -3   7   0   12.79    0.39 
  -3   7   0   12.63    0.44 
  -3   7   0   12.59    0.40 
  -3   7   0   12.93    0.41 
   3   8   0   10.13    0.34 
   3   8   0   10.35    0.30 
   3  -8   0    9.85    0.25 
   3   8   0    9.74    0.35 
   3  -8   0    8.77    0.45 
  -3   8   0    9.84    0.35 
  -3   8   0    9.98    0.34 
  -3   8   0    9.67    0.36 
  -3   8   0    9.99    0.33 
  -3   8   0   10.38    0.40 
   3   9   0    6.14    0.29 
   3  -9   0    6.29    0.30 
   3   9   0    5.96    0.26 
   3   9   0    6.14    0.22 
  -3   9   0    5.95    0.28 
  -3   9   0    6.03    0.26 
  -3   9   0    6.51    0.33 
  -3   9   0    5.70    0.27 
  -3   9   0    6.00    0.26 
   3  10   0  125.77    3.05 
   3 -10   0  126.90    3.09 
   3  10   0  124.72    2.99 
   3  10   0  128.77    3.08 
  -3  10   0  123.99    3.12 
  -3  10   0  126.91    3.04 
  -3  10   0  126.16    3.03 
  -3  10   0  126.55    3.05 
  -3  10   0  125.35    3.04 
  -3  10   0  125.10    3.17 
   3  11   0   21.58    0.69 
   3 -11   0   21.28    0.68 
   3  11   0   21.09    0.59 
   3  11   0   21.59    0.67 
  -3  11   0   21.32    0.63 
  -3  11   0   20.90    0.62 
  -3  11   0   21.35    0.65 
  -3  11   0   21.53    0.73 
  -3  11   0   21.91    1.02 
  -3  11   0   20.81    0.64 
   3  12   0   16.19    0.59 
   3  12   0   16.19    0.49 
   3  12   0   16.45    0.57 
  -3  12   0   16.37    0.54 
  -3  12   0   15.92    0.64 
  -3  12   0   16.03    0.53 
  -3  12   0   16.31    0.69 
  -3  12   0   13.60    0.61 
  -3  12   0   16.38    0.50 
   3  13   0    1.36    0.21 
   3  13   0    1.07    0.13 
   3  13   0    1.15    0.21 
  -3  13   0    0.84    0.24 
  -3  13   0    0.99    0.13 
  -3  13   0    1.02    0.22 
  -3  13   0    1.10    0.17 
  -3  13   0    1.29    0.19 
  -3  13   0    1.22    0.16 
   3  14   0    0.21    0.20 
   3  14   0    0.01    0.35 
   3  14   0    0.17    0.11 
  -3  14   0    0.31    0.10 
  -3  14   0   -0.31    0.22 
  -3  14   0    0.28    0.23 
  -3  14   0    0.27    0.13 
  -3  14   0   -0.12    0.18 
  -3  14   0    0.07    0.17 
   3  15   0   -0.22    0.23 
   3  15   0    0.23    0.25 
   3  15   0    0.07    0.13 
  -3  15   0    0.11    0.12 
  -3  15   0    0.15    0.31 
  -3  15   0    0.02    0.13 
  -3  15   0    0.19    0.24 
  -3  15   0    0.52    0.29 
  -3  15   0    0.31    0.22 
   3  16   0    5.13    0.54 
   3  16   0    4.68    0.54 
   3  16   0    3.19    0.34 
  -3  16   0    4.26    0.48 
  -3  16   0    4.19    0.48 
  -3  16   0    4.12    0.49 
  -3  16   0    3.93    0.27 
   4   0   0   15.88    0.45 
   4   0   0   17.20    0.45 
   4   0   0   16.02    0.45 
   4   0   0   15.51    0.45 
  -4   0   0   16.47    0.47 
  -4   0   0   16.07    0.44 
  -4   0   0   16.62    0.45 
  -4   0   0   16.01    0.47 
   4   1   0   99.74    2.28 
   4   1   0   96.69    2.28 
   4   1   0   94.29    2.28 
   4  -1   0   98.35    2.29 
   4  -1   0   97.13    2.29 
   4  -1   0   95.43    2.29 
   4  -1   0   93.56    2.29 
  -4   1   0   92.42    2.31 
  -4   1   0   93.34    2.28 
  -4  -1   0   94.34    2.30 
  -4  -1   0   98.14    2.28 
  -4   1   0   96.97    2.32 
  -4  -1   0   96.36    2.27 
  -4   1   0   89.90    2.29 
  -4  -1   0   98.07    2.23 
  -4  -1   0   96.92    2.30 
   4  -2   0    0.93    0.09 
   4  -2   0    0.93    0.09 
   4  -2   0    1.21    0.10 
   4   2   0    1.09    0.09 
   4   2   0    1.19    0.08 
  -4   2   0    1.18    0.10 
  -4   2   0    1.09    0.09 
  -4  -2   0    0.95    0.09 
  -4   2   0    1.05    0.12 
  -4   2   0    1.01    0.11 
  -4   2   0    0.97    0.09 
  -4  -2   0    1.32    0.09 
  -4   2   0    0.88    0.10 
  -4  -2   0    1.10    0.08 
   4  -3   0   29.34    0.75 
   4   3   0   28.64    0.73 
   4  -3   0   28.85    0.74 
   4  -3   0   28.77    0.76 
  -4  -3   0   27.09    0.73 
  -4   3   0   27.00    0.76 
  -4   3   0   27.98    0.75 
  -4   3   0   29.16    0.76 
  -4  -3   0   29.53    0.72 
  -4   3   0   28.87    0.78 
  -4  -3   0   29.20    0.73 
  -4   3   0   27.30    0.75 
  -4   3   0   28.40    0.77 
   4   4   0    0.99    0.05 
   4  -4   0    1.17    0.10 
   4  -4   0    1.17    0.12 
   4   4   0    1.11    0.09 
   4  -4   0    0.98    0.10 
  -4   4   0    1.01    0.11 
  -4  -4   0    0.95    0.07 
  -4   4   0    1.00    0.11 
  -4   4   0    1.12    0.10 
  -4  -4   0    1.04    0.08 
  -4   4   0    0.99    0.12 
  -4   4   0    1.03    0.12 
  -4   4   0    1.18    0.13 
   4  -5   0    5.63    0.21 
   4   5   0    5.65    0.20 
   4   5   0    5.66    0.18 
   4  -5   0    5.81    0.25 
   4  -5   0    5.74    0.22 
  -4   5   0    5.75    0.23 
  -4   5   0    5.72    0.26 
  -4  -5   0    5.68    0.19 
  -4   5   0    5.55    0.26 
  -4  -5   0    5.49    0.19 
  -4   5   0    5.99    0.24 
  -4  -5   0    5.54    0.18 
  -4   5   0    5.51    0.25 
  -4   5   0    5.88    0.24 
   4   6   0    9.95    0.30 
   4  -6   0    9.77    0.31 
   4  -6   0   10.10    0.31 
   4  -6   0    9.65    0.36 
   4   6   0   10.06    0.30 
  -4   6   0    9.69    0.34 
  -4  -6   0    9.76    0.26 
  -4  -6   0    9.78    0.29 
  -4  -6   0    9.81    0.27 
  -4   6   0    9.70    0.33 
  -4   6   0   10.56    0.36 
  -4   6   0    9.68    0.37 
  -4   6   0    9.62    0.35 
  -4   6   0    9.54    0.37 
   4   7   0    0.68    0.08 
   4  -7   0    0.69    0.08 
   4  -7   0    0.58    0.13 
   4  -7   0    0.60    0.08 
   4   7   0    0.66    0.08 
  -4   7   0    0.58    0.11 
  -4   7   0    0.63    0.09 
  -4   7   0    0.31    0.10 
  -4   7   0    0.60    0.12 
  -4   7   0    0.50    0.09 
  -4   7   0    0.68    0.10 
   4  -8   0   12.86    0.45 
   4  -8   0   11.89    0.34 
   4   8   0   12.39    0.39 
   4  -8   0   12.24    0.35 
   4   8   0   12.35    0.37 
  -4   8   0   12.39    0.45 
  -4   8   0   13.31    0.43 
  -4   8   0   12.33    0.43 
  -4   8   0   10.89    0.48 
  -4   8   0   12.29    0.41 
  -4   8   0   11.97    0.46 
   4   9   0   41.04    1.08 
   4   9   0   40.35    1.07 
   4  -9   0   41.57    0.98 
   4  -9   0   41.74    0.99 
   4  -9   0   41.67    1.13 
   4   9   0   41.26    1.04 
  -4   9   0   40.36    1.09 
  -4   9   0   41.77    1.10 
  -4   9   0   39.58    1.12 
  -4   9   0   41.71    1.09 
  -4   9   0   40.72    1.15 
  -4   9   0   40.83    1.20 
  -4   9   0   40.24    1.11 
   4  10   0    5.32    0.23 
   4  10   0    4.90    0.26 
   4  10   0    5.18    0.27 
   4 -10   0    5.18    0.31 
  -4  10   0    5.17    0.27 
  -4  10   0    5.10    0.36 
  -4  10   0    4.37    0.41 
  -4  10   0    5.04    0.28 
  -4  10   0    5.16    0.34 
  -4  10   0    5.14    0.30 
  -4  10   0    5.01    0.29 
   4  11   0   50.05    1.31 
   4  11   0   49.19    1.30 
   4  11   0   49.72    1.24 
  -4  11   0   49.59    1.30 
  -4  11   0   49.17    1.31 
  -4  11   0   49.77    1.35 
  -4  11   0   47.99    1.31 
  -4  11   0   49.29    1.30 
  -4  11   0   46.81    1.42 
   4  12   0    1.23    0.19 
   4  12   0    1.26    0.19 
   4  12   0    1.16    0.13 
  -4  12   0    1.04    0.17 
  -4  12   0    1.28    0.23 
  -4  12   0    1.09    0.19 
  -4  12   0    1.72    0.29 
  -4  12   0    1.52    0.20 
  -4  12   0    1.02    0.15 
  -4  12   0    1.39    0.18 
   4  13   0    0.19    0.17 
   4  13   0   -0.02    0.09 
   4  13   0    0.21    0.16 
   4 -13   0    0.07    0.17 
  -4  13   0    0.08    0.17 
  -4  13   0    0.26    0.21 
  -4  13   0    0.09    0.20 
  -4  13   0    0.08    0.15 
  -4  13   0    0.16    0.11 
  -4  13   0   -0.10    0.16 
  -4  13   0    0.22    0.16 
   4  14   0    0.39    0.19 
   4  14   0    0.46    0.14 
   4  14   0    0.73    0.21 
  -4  14   0    0.29    0.26 
  -4  14   0    0.19    0.21 
  -4  14   0    0.46    0.13 
  -4  14   0    0.41    0.16 
  -4  14   0    0.18    0.23 
  -4  14   0    0.35    0.24 
   4  15   0    0.00    0.24 
   4  15   0    0.32    0.15 
   4  15   0    0.31    0.23 
  -4  15   0    0.30    0.25 
  -4  15   0   -0.14    0.30 
  -4  15   0    0.28    0.24 
  -4  15   0    0.27    0.30 
  -4  15   0    0.37    0.17 
   4  16   0    0.84    0.31 
   4  16   0    1.07    0.30 
   4  16   0    1.03    0.21 
  -4  16   0    1.07    0.32 
  -4  16   0    0.97    0.21 
  -4  16   0    1.34    0.37 
  -4  16   0    0.93    0.38 
   5   0   0    0.07    0.05 
   5   0   0    0.05    0.05 
   5   0   0    0.05    0.05 
  -5   0   0    0.10    0.05 
  -5   0   0    0.12    0.05 
  -5   0   0    0.11    0.05 
  -5   0   0    0.05    0.07 
   5  -1   0    9.03    0.31 
   5   1   0    8.99    0.30 
   5  -1   0    9.09    0.30 
   5  -1   0    9.00    0.30 
   5   1   0    8.82    0.29 
   5   1   0    8.70    0.29 
   5  -1   0    9.50    0.31 
   5   1   0    8.57    0.29 
  -5   1   0    8.53    0.30 
  -5   1   0    8.66    0.30 
  -5  -1   0    9.17    0.32 
  -5   1   0    9.33    0.33 
  -5  -1   0    8.87    0.28 
  -5  -1   0    8.84    0.31 
  -5   1   0    8.96    0.33 
  -5  -1   0    8.61    0.29 
   5  -2   0   19.15    0.59 
   5  -2   0   21.29    0.59 
   5   2   0   21.84    0.57 
   5  -2   0   21.55    0.60 
   5   2   0   21.91    0.57 
   5  -2   0   20.48    0.59 
   5   2   0   20.88    0.58 
  -5   2   0   20.10    0.59 
  -5  -2   0   22.46    0.60 
  -5   2   0   20.53    0.62 
  -5   2   0   20.99    0.62 
  -5  -2   0   21.60    0.57 
  -5   2   0   21.69    0.60 
  -5  -2   0   21.25    0.59 
   5  -3   0   68.30    1.75 
   5   3   0   72.96    1.72 
   5  -3   0   70.83    1.74 
   5   3   0   72.72    1.71 
   5  -3   0   71.23    1.74 
  -5  -3   0   69.86    1.70 
  -5   3   0   71.32    1.75 
  -5  -3   0   70.75    1.73 
  -5  -3   0   69.61    1.73 
  -5   3   0   68.22    1.78 
  -5   3   0   73.00    1.78 
  -5   3   0   73.16    1.76 
  -5   3   0   67.19    1.74 
  -5   3   0   70.36    1.74 
   5   4   0  122.49    2.95 
   5  -4   0  126.45    3.00 
   5  -4   0  126.25    2.98 
   5  -4   0  120.71    2.97 
  -5  -4   0  126.32    2.94 
  -5   4   0  128.27    3.02 
  -5   4   0  122.65    3.02 
  -5  -4   0  122.20    2.95 
  -5   4   0  123.58    2.98 
  -5  -4   0  124.45    2.96 
  -5   4   0  126.86    3.01 
  -5   4   0  126.26    2.99 
  -5   4   0  119.03    2.99 
   5  -5   0   10.64    0.35 
   5   5   0   10.33    0.33 
   5   5   0   10.66    0.27 
   5  -5   0   10.36    0.35 
   5  -5   0   10.82    0.38 
  -5   5   0   10.45    0.37 
  -5   5   0   10.72    0.39 
  -5  -5   0   10.75    0.33 
  -5  -5   0   10.49    0.31 
  -5   5   0   10.81    0.39 
  -5   5   0   10.13    0.40 
  -5   5   0   10.67    0.37 
  -5   5   0   10.80    0.37 
   5   6   0    1.42    0.09 
   5  -6   0    1.64    0.20 
   5  -6   0    1.29    0.13 
   5   6   0    1.45    0.12 
   5  -6   0    1.58    0.14 
  -5   6   0    1.67    0.15 
  -5   6   0    1.21    0.14 
  -5   6   0    1.34    0.17 
  -5  -6   0    1.64    0.10 
  -5   6   0    1.56    0.16 
  -5   6   0    1.73    0.19 
  -5   6   0    1.45    0.18 
  -5  -6   0    1.18    0.09 
  -5  -6   0    1.53    0.11 
   5   7   0   13.59    0.41 
   5  -7   0   13.04    0.41 
   5  -7   0   13.18    0.48 
   5   7   0   14.18    0.39 
   5  -7   0   14.32    0.42 
  -5   7   0   13.63    0.47 
  -5   7   0   14.45    0.49 
  -5  -7   0   13.81    0.37 
  -5   7   0   14.02    0.46 
  -5   7   0   13.34    0.47 
  -5  -7   0   14.09    0.36 
  -5   7   0   14.03    0.50 
  -5   7   0   13.39    0.49 
  -5  -7   0   13.75    0.39 
   5  -8   0   35.48    1.00 
   5   8   0   35.80    0.90 
   5   8   0   35.08    0.91 
   5  -8   0   36.13    0.90 
   5  -8   0   35.22    0.90 
  -5   8   0   34.20    1.01 
  -5   8   0   35.23    0.99 
  -5   8   0   33.19    0.97 
  -5   8   0   35.81    0.98 
  -5   8   0   35.93    0.99 
  -5   8   0   33.97    1.00 
   5   9   0    1.96    0.16 
   5  -9   0    1.83    0.13 
   5   9   0    2.05    0.17 
   5  -9   0    2.27    0.23 
   5  -9   0    2.06    0.14 
  -5   9   0    2.19    0.21 
  -5   9   0    1.45    0.21 
  -5   9   0    1.67    0.19 
  -5   9   0    2.04    0.21 
  -5   9   0    1.98    0.23 
  -5   9   0    1.84    0.21 
  -5   9   0    2.05    0.23 
   5 -10   0   14.17    0.38 
   5  10   0   14.62    0.44 
   5 -10   0   13.98    0.54 
   5  10   0   14.33    0.47 
   5 -10   0   13.88    0.38 
   5  10   0   14.63    0.46 
  -5  10   0   12.97    0.58 
  -5  10   0   14.64    0.51 
  -5  10   0   12.15    0.76 
  -5  10   0   13.83    0.53 
  -5  10   0   14.08    0.53 
  -5  10   0   14.17    0.51 
  -5  10   0   14.31    0.52 
   5  11   0    0.77    0.14 
   5  11   0    0.87    0.14 
   5  11   0    0.79    0.12 
  -5  11   0    0.52    0.18 
  -5  11   0    0.52    0.13 
  -5  11   0    0.81    0.18 
  -5  11   0    0.69    0.20 
  -5  11   0    0.96    0.16 
  -5  11   0    0.73    0.18 
  -5  11   0    0.54    0.16 
   5  12   0    0.04    0.10 
   5  12   0    0.04    0.14 
   5  12   0    0.04    0.12 
   5 -12   0    0.04    0.16 
  -5  12   0   -0.21    0.16 
  -5  12   0    0.04    0.20 
  -5  12   0    0.12    0.23 
  -5  12   0    0.09    0.16 
  -5  12   0    0.03    0.15 
  -5  12   0    0.00    0.16 
  -5  12   0    0.14    0.14 
   5  13   0    5.96    0.37 
   5  13   0    5.97    0.31 
   5 -13   0    5.01    0.45 
   5  13   0    6.34    0.39 
  -5  13   0    5.95    0.53 
  -5  13   0    5.71    0.42 
  -5  13   0    5.73    0.44 
  -5  13   0    6.19    0.39 
  -5  13   0    5.75    0.48 
  -5  13   0    5.82    0.35 
   5  14   0    4.52    0.30 
   5  14   0    4.85    0.42 
   5  14   0    4.03    0.37 
  -5  14   0    4.40    0.53 
  -5  14   0    4.16    0.33 
  -5  14   0    4.54    0.45 
  -5  14   0    3.51    0.40 
  -5  14   0    4.29    0.47 
  -5  14   0    4.23    0.38 
   5  15   0    0.36    0.17 
   5  15   0    0.29    0.28 
   5  15   0    0.61    0.26 
  -5  15   0    0.35    0.28 
  -5  15   0    0.30    0.33 
  -5  15   0    0.67    0.21 
  -5  15   0    0.12    0.32 
   5  16   0    1.89    0.36 
   5  16   0    1.71    0.31 
   5  16   0    1.72    0.26 
  -5  16   0    1.49    0.43 
  -5  16   0    1.89    0.36 
  -5  16   0    1.73    0.26 
  -5  16   0    1.48    0.45 
   6   0   0  278.70    6.47 
   6   0   0  270.00    6.47 
   6   0   0  282.29    6.48 
   6   0   0  277.54    6.48 
  -6   0   0  275.26    6.51 
  -6   0   0  273.37    6.51 
  -6   0   0  275.86    6.48 
  -6   0   0  273.35    6.46 
  -6   0   0  276.30    6.43 
   6  -1   0   34.84    0.95 
   6   1   0   37.15    0.95 
   6   1   0   37.37    0.95 
   6   1   0   37.21    0.94 
   6  -1   0   36.04    0.96 
   6  -1   0   36.48    0.96 
   6  -1   0   36.53    0.96 
   6   1   0   37.43    0.96 
  -6  -1   0   35.37    0.94 
  -6  -1   0   35.71    0.97 
  -6  -1   0   35.22    0.93 
  -6  -1   0   36.50    0.98 
  -6  -1   0   38.30    0.88 
  -6   1   0   34.71    0.99 
  -6   1   0   35.53    0.95 
  -6   1   0   35.07    0.98 
  -6   1   0   35.52    0.95 
   6   2   0   81.47    1.97 
   6  -2   0   80.35    1.99 
   6   2   0   79.30    1.97 
   6   2   0   83.71    1.96 
   6  -2   0   75.58    1.99 
   6  -2   0   82.63    2.00 
   6  -2   0   82.84    1.99 
  -6   2   0   80.45    1.99 
  -6   2   0   75.80    2.02 
  -6  -2   0   79.92    1.99 
  -6   2   0   83.78    2.00 
  -6   2   0   82.49    2.03 
  -6  -2   0   79.41    1.96 
  -6  -2   0   82.29    2.00 
   6   3   0  106.64    2.55 
   6   3   0  110.18    2.55 
   6  -3   0  105.52    2.57 
   6  -3   0  107.20    2.59 
   6  -3   0  110.00    2.58 
   6   3   0  108.21    2.56 
  -6   3   0  101.95    2.58 
  -6  -3   0  108.33    2.58 
  -6   3   0  101.47    2.62 
  -6  -3   0  105.23    2.57 
  -6  -3   0  106.89    2.54 
  -6   3   0  105.18    2.62 
  -6   3   0  102.38    2.58 
   6   4   0   21.83    0.60 
   6  -4   0   22.03    0.64 
   6  -4   0   22.22    0.63 
   6   4   0   21.93    0.62 
   6   4   0   22.39    0.60 
   6  -4   0   22.88    0.66 
  -6  -4   0   22.38    0.62 
  -6   4   0   21.27    0.67 
  -6   4   0   21.05    0.68 
  -6   4   0   21.49    0.65 
  -6   4   0   21.26    0.65 
  -6   4   0   22.31    0.64 
  -6  -4   0   22.38    0.59 
  -6   4   0   21.74    0.66 
  -6  -4   0   22.03    0.62 
   6  -5   0   58.89    1.46 
   6   5   0   57.48    1.44 
   6   5   0   58.17    1.43 
   6  -5   0   58.33    1.47 
   6  -5   0   57.56    1.65 
   6   5   0   56.70    1.42 
  -6  -5   0   58.82    1.44 
  -6   5   0   57.36    1.53 
  -6   5   0   58.83    1.49 
  -6   5   0   58.52    1.52 
  -6  -5   0   57.61    1.42 
  -6  -5   0   56.87    1.43 
  -6   5   0   57.67    1.50 
  -6   5   0   56.74    1.52 
   6  -6   0    0.90    0.11 
   6   6   0    1.47    0.14 
   6  -6   0    1.51    0.16 
  -6  -6   0    1.11    0.10 
  -6   6   0    1.33    0.16 
  -6  -6   0    1.52    0.13 
  -6   6   0    1.74    0.21 
  -6   6   0    1.53    0.16 
  -6   6   0    1.21    0.16 
  -6   6   0    1.10    0.15 
   6  -7   0    4.28    0.22 
   6   7   0    4.35    0.14 
   6  -7   0    3.99    0.27 
   6   7   0    4.07    0.21 
   6  -7   0    4.10    0.22 
  -6   7   0    4.12    0.28 
  -6   7   0    4.53    0.29 
  -6   7   0    4.29    0.25 
  -6  -7   0    4.35    0.18 
  -6   7   0    4.00    0.28 
  -6  -7   0    4.50    0.18 
  -6   7   0    4.24    0.27 
  -6   7   0    4.69    0.26 
  -6  -7   0    4.35    0.17 
   6  -8   0   35.92    0.94 
   6  -8   0   35.37    0.93 
   6   8   0   35.77    0.88 
   6  -8   0   34.63    1.02 
   6   8   0   34.89    0.94 
  -6   8   0   36.11    1.08 
  -6  -8   0   35.29    0.86 
  -6   8   0   35.28    0.99 
  -6   8   0   34.93    1.04 
  -6   8   0   36.14    1.03 
  -6  -8   0   35.81    0.87 
  -6   8   0   35.00    1.01 
  -6   8   0   35.71    1.04 
  -6   8   0   35.30    1.00 
   6   9   0    0.09    0.07 
   6  -9   0    0.14    0.08 
   6   9   0    0.25    0.09 
   6  -9   0    0.18    0.09 
  -6   9   0    0.17    0.14 
  -6   9   0    0.13    0.12 
  -6   9   0    0.26    0.15 
  -6   9   0    0.20    0.16 
  -6   9   0    0.23    0.13 
  -6   9   0    0.23    0.12 
  -6   9   0    0.24    0.13 
   6 -10   0    0.12    0.08 
   6  10   0    0.26    0.09 
   6 -10   0    0.19    0.09 
   6  10   0    0.17    0.10 
  -6  10   0    0.21    0.17 
  -6  10   0    0.10    0.13 
  -6  10   0    0.48    0.15 
  -6  10   0    0.02    0.14 
  -6  10   0    0.10    0.15 
  -6  10   0    0.14    0.16 
  -6  10   0    0.32    0.13 
   6  11   0    7.17    0.25 
   6 -11   0    7.52    0.24 
   6 -11   0    7.41    0.25 
   6  11   0    7.33    0.31 
   6 -11   0    7.42    0.42 
   6  11   0    7.50    0.32 
   6  11   0    7.56    0.35 
  -6  11   0    7.60    0.42 
  -6  11   0    7.47    0.47 
  -6  11   0    6.65    0.48 
  -6  11   0    7.57    0.42 
  -6  11   0    7.30    0.40 
  -6  11   0    6.48    0.55 
   6  12   0    4.82    0.21 
   6  12   0    5.01    0.33 
   6 -12   0    4.94    0.42 
   6  12   0    5.18    0.28 
   6  12   0    4.71    0.29 
  -6  12   0    4.77    0.46 
  -6  12   0    4.91    0.40 
  -6  12   0    5.56    0.39 
  -6  12   0    4.61    0.47 
  -6  12   0    4.51    0.37 
  -6  12   0    5.03    0.41 
   6  13   0    3.06    0.35 
   6  13   0    2.80    0.29 
   6  13   0    2.78    0.18 
   6  13   0    2.84    0.26 
  -6  13   0    2.48    0.36 
  -6  13   0    2.54    0.31 
  -6  13   0    2.60    0.29 
  -6  13   0    2.27    0.25 
  -6  13   0    2.78    0.37 
  -6  13   0    2.74    0.31 
   6  14   0    1.18    0.22 
   6  14   0    1.01    0.19 
   6  14   0    1.01    0.25 
  -6  14   0    0.87    0.30 
  -6  14   0    1.08    0.34 
  -6  14   0    1.35    0.26 
  -6  14   0    1.21    0.29 
   6  15   0    2.35    0.25 
   6  15   0    2.00    0.32 
   6  15   0    1.93    0.28 
  -6  15   0    1.86    0.42 
  -6  15   0    2.09    0.29 
  -6  15   0    2.25    0.45 
  -6  15   0    1.92    0.36 
   7   0   0    0.11    0.07 
   7   0   0    0.22    0.08 
   7   0   0    0.06    0.07 
   7   0   0    0.16    0.08 
  -7   0   0    0.14    0.06 
  -7   0   0    0.08    0.05 
  -7   0   0    0.02    0.08 
  -7   0   0    0.19    0.06 
  -7   0   0    0.09    0.07 
   7  -1   0    4.07    0.23 
   7  -1   0    4.08    0.23 
   7   1   0    3.98    0.21 
   7   1   0    4.31    0.23 
   7  -1   0    4.39    0.22 
   7   1   0    4.63    0.22 
   7  -1   0    5.04    0.24 
   7   1   0    4.49    0.23 
  -7  -1   0    4.35    0.15 
  -7  -1   0    4.15    0.20 
  -7  -1   0    4.21    0.25 
  -7   1   0    4.54    0.23 
  -7  -1   0    4.05    0.21 
  -7  -1   0    4.45    0.24 
  -7   1   0    4.31    0.25 
  -7   1   0    4.54    0.20 
  -7   1   0    4.37    0.22 
   7  -2   0   25.77    0.73 
   7  -2   0   25.81    0.74 
   7   2   0   24.87    0.72 
   7  -2   0   25.94    0.74 
   7  -2   0   25.29    0.74 
   7   2   0   26.57    0.72 
   7   2   0   26.00    0.71 
   7   2   0   24.76    0.71 
  -7  -2   0   26.37    0.75 
  -7  -2   0   24.69    0.74 
  -7   2   0   25.57    0.77 
  -7   2   0   25.47    0.73 
  -7   2   0   24.95    0.73 
  -7   2   0   24.36    0.77 
  -7  -2   0   25.54    0.71 
  -7   2   0   25.33    0.71 
   7   3   0    0.04    0.06 
   7  -3   0    0.01    0.07 
   7  -3   0   -0.05    0.14 
   7  -3   0   -0.08    0.07 
   7   3   0   -0.08    0.07 
   7   3   0    0.07    0.07 
  -7  -3   0   -0.04    0.05 
  -7  -3   0    0.09    0.08 
  -7  -3   0   -0.02    0.08 
  -7   3   0   -0.05    0.08 
  -7   3   0   -0.07    0.08 
  -7   3   0    0.18    0.10 
  -7   3   0   -0.11    0.08 
   7   4   0   49.87    1.29 
   7   4   0   50.77    1.27 
   7   4   0   50.94    1.27 
   7  -4   0   51.32    1.31 
   7  -4   0   49.10    1.31 
   7  -4   0   51.81    1.34 
  -7  -4   0   51.45    1.26 
  -7  -4   0   49.89    1.29 
  -7   4   0   51.50    1.37 
  -7   4   0   49.93    1.33 
  -7   4   0   50.69    1.36 
  -7   4   0   48.89    1.32 
  -7  -4   0   44.37    1.34 
   7  -5   0    2.09    0.21 
   7   5   0    1.82    0.15 
   7  -5   0    1.98    0.18 
   7   5   0    1.86    0.16 
   7   5   0    1.71    0.16 
   7  -5   0    1.50    0.18 
  -7   5   0    2.00    0.19 
  -7  -5   0    1.90    0.16 
  -7  -5   0    1.89    0.14 
  -7  -5   0    1.90    0.17 
  -7   5   0    1.72    0.21 
  -7   5   0    1.90    0.24 
  -7   5   0    2.14    0.22 
   7   6   0    0.61    0.10 
   7   6   0    0.67    0.11 
   7  -6   0    0.68    0.12 
   7   6   0    0.91    0.11 
   7  -6   0    0.61    0.12 
   7  -6   0    0.65    0.13 
  -7   6   0    0.87    0.15 
  -7  -6   0    0.88    0.11 
  -7   6   0    0.87    0.15 
  -7   6   0    0.83    0.16 
  -7  -6   0    0.92    0.10 
  -7   6   0    0.82    0.14 
  -7   6   0    0.77    0.16 
  -7  -6   0    0.47    0.08 
  -7   6   0    0.85    0.17 
   7  -7   0   39.89    1.03 
   7  -7   0   32.82    1.07 
   7   7   0   37.98    0.98 
   7   7   0   37.99    1.01 
   7  -7   0   38.24    1.02 
  -7  -7   0   40.34    0.99 
  -7   7   0   38.80    1.11 
  -7   7   0   39.32    1.13 
  -7  -7   0   38.25    0.97 
  -7   7   0   38.84    1.10 
  -7  -7   0   32.71    1.01 
  -7   7   0   39.02    1.09 
  -7   7   0   38.75    1.07 
  -7   7   0   37.76    1.11 
   7   8   0    6.71    0.27 
   7  -8   0    6.77    0.30 
   7  -8   0    6.64    0.30 
   7   8   0    6.50    0.29 
  -7   8   0    6.68    0.36 
  -7   8   0    6.87    0.42 
  -7  -8   0    7.01    0.26 
  -7  -8   0    6.74    0.23 
  -7   8   0    6.73    0.36 
  -7   8   0    6.31    0.38 
  -7  -8   0    6.66    0.25 
  -7   8   0    7.11    0.38 
  -7   8   0    6.91    0.39 
   7   9   0    6.27    0.20 
   7   9   0    6.16    0.29 
   7  -9   0    6.23    0.29 
   7  -9   0    6.07    0.28 
   7   9   0    6.25    0.26 
  -7   9   0    6.22    0.39 
  -7   9   0    6.18    0.42 
  -7  -9   0    5.99    0.24 
  -7   9   0    6.52    0.37 
  -7   9   0    6.33    0.40 
  -7   9   0    6.55    0.38 
  -7   9   0    6.14    0.40 
  -7  -9   0    6.16    0.19 
   7  10   0   12.44    0.43 
   7  10   0   11.91    0.35 
   7 -10   0   12.23    0.42 
   7  10   0   11.75    0.38 
   7 -10   0   12.04    0.41 
  -7  10   0   12.88    0.53 
  -7  10   0   11.54    0.52 
  -7  10   0   11.08    0.52 
  -7  10   0   11.60    0.57 
  -7  10   0   11.83    0.54 
  -7  10   0   11.16    0.58 
   7  11   0   20.28    0.58 
   7  11   0   20.34    0.64 
   7 -11   0   20.36    0.58 
   7 -11   0   20.43    0.58 
   7  11   0   20.95    0.57 
   7 -11   0   19.48    0.75 
   7  11   0   21.30    0.65 
  -7  11   0   21.11    0.75 
  -7  11   0   20.41    0.79 
  -7  11   0   20.51    0.76 
  -7  11   0   21.00    0.83 
  -7  11   0   21.10    0.75 
  -7  11   0   20.74    0.75 
   7 -12   0    4.05    0.20 
   7  12   0    5.30    0.26 
   7  12   0    5.22    0.26 
   7 -12   0    5.09    0.22 
   7  12   0    5.01    0.31 
   7  12   0    5.16    0.34 
  -7  12   0    4.96    0.51 
  -7  12   0    5.49    0.44 
  -7  12   0    5.72    0.44 
  -7  12   0    5.00    0.43 
  -7  12   0    5.11    0.48 
  -7  12   0    5.37    0.45 
   7  13   0    7.28    0.38 
   7  13   0    6.82    0.30 
   7  13   0    7.07    0.34 
   7  13   0    6.24    0.50 
  -7  13   0    6.50    0.48 
  -7  13   0    6.88    0.60 
  -7  13   0    7.27    0.57 
  -7  13   0    7.37    0.52 
  -7  13   0    6.86    0.50 
   7  14   0   11.77    0.57 
   7  14   0   10.97    0.46 
   7  14   0   11.54    0.49 
  -7  14   0   11.68    0.63 
  -7  14   0   11.26    0.73 
  -7  14   0   10.44    0.74 
  -7  14   0   11.74    0.67 
   7  15   0   12.37    0.67 
   7  15   0   11.83    0.65 
  -7  15   0   11.87    0.97 
  -7  15   0   12.55    0.84 
  -7  15   0   11.80    0.66 
   8   0   0   26.94    0.77 
   8   0   0   26.05    0.76 
   8   0   0   26.23    0.76 
   8   0   0   25.85    0.76 
  -8   0   0   25.34    0.80 
  -8   0   0   26.18    0.79 
  -8   0   0   26.30    0.74 
  -8   0   0   24.79    0.75 
  -8   0   0   26.44    0.69 
   8   1   0   19.32    0.57 
   8  -1   0   17.50    0.57 
   8  -1   0   17.75    0.59 
   8   1   0   18.40    0.57 
   8   1   0   17.82    0.57 
   8  -1   0   18.31    0.58 
   8  -1   0   17.90    0.58 
   8   1   0   18.33    0.58 
  -8   1   0   18.30    0.61 
  -8   1   0   17.34    0.56 
  -8  -1   0   18.41    0.47 
  -8  -1   0   18.09    0.55 
  -8  -1   0   17.91    0.61 
  -8   1   0   18.78    0.58 
  -8  -1   0   14.82    0.67 
  -8   1   0   18.49    0.53 
  -8  -1   0   18.27    0.60 
  -8   1   0   17.85    0.62 
   8  -2   0    0.26    0.10 
   8  -2   0    0.39    0.10 
   8   2   0    0.70    0.12 
   8  -2   0    0.29    0.10 
   8   2   0    0.34    0.11 
   8   2   0    0.40    0.10 
   8  -2   0    0.33    0.10 
  -8   2   0    0.32    0.11 
  -8   2   0    0.23    0.12 
  -8   2   0    0.34    0.10 
  -8  -2   0    0.50    0.10 
  -8   2   0    0.33    0.09 
  -8   2   0    0.56    0.10 
  -8  -2   0    0.18    0.11 
  -8  -2   0    0.32    0.12 
   8   3   0   17.01    0.54 
   8   3   0   16.65    0.54 
   8   3   0   16.76    0.55 
   8  -3   0   16.95    0.57 
   8  -3   0   16.63    0.55 
   8   3   0   17.33    0.53 
   8  -3   0   17.13    0.56 
  -8   3   0   17.48    0.61 
  -8   3   0   16.22    0.56 
  -8  -3   0   17.12    0.56 
  -8  -3   0   17.96    0.52 
  -8   3   0   16.60    0.61 
  -8   3   0   17.17    0.55 
  -8   3   0   15.78    0.55 
  -8  -3   0   16.37    0.56 
   8   4   0    9.63    0.36 
   8  -4   0    9.93    0.40 
   8   4   0    9.78    0.37 
   8  -4   0    9.57    0.39 
   8  -4   0   10.57    0.42 
   8   4   0   10.12    0.38 
   8   4   0    9.70    0.37 
  -8   4   0   10.42    0.46 
  -8  -4   0   10.15    0.39 
  -8   4   0    9.38    0.40 
  -8  -4   0    9.93    0.35 
  -8   4   0    9.91    0.41 
  -8  -4   0    9.90    0.39 
  -8   4   0    9.64    0.41 
  -8   4   0    9.61    0.44 
   8   5   0   23.50    0.70 
   8   5   0   24.20    0.69 
   8  -5   0   25.01    0.77 
   8   5   0   22.99    0.69 
   8  -5   0   24.01    0.73 
   8  -5   0   23.79    0.72 
  -8   5   0   22.54    0.79 
  -8   5   0   23.56    0.79 
  -8   5   0   24.13    0.76 
  -8  -5   0   23.55    0.66 
  -8  -5   0   23.91    0.71 
  -8  -5   0   24.83    0.71 
  -8   5   0   23.53    0.76 
   8   6   0    0.29    0.11 
   8  -6   0    0.19    0.11 
   8   6   0    0.34    0.10 
   8  -6   0    0.46    0.14 
   8  -6   0    0.21    0.13 
   8   6   0    0.46    0.12 
  -8   6   0    0.17    0.16 
  -8  -6   0    0.30    0.13 
  -8  -6   0    0.37    0.10 
  -8   6   0    0.38    0.15 
  -8  -6   0    0.39    0.09 
  -8   6   0    0.38    0.11 
  -8   6   0    0.17    0.14 
  -8   6   0    0.32    0.14 
   8   7   0   42.20    1.15 
   8   7   0   43.17    1.13 
   8  -7   0   44.11    1.17 
   8   7   0   44.02    1.14 
   8  -7   0   44.73    1.18 
  -8   7   0   42.93    1.41 
  -8   7   0   35.09    1.41 
  -8   7   0   44.35    1.23 
  -8  -7   0   45.07    1.13 
  -8   7   0   43.46    1.28 
  -8   7   0   44.02    1.26 
   8   8   0   47.75    1.23 
   8   8   0   47.20    1.24 
   8  -8   0   46.40    1.25 
   8   8   0   45.87    1.21 
   8  -8   0   46.81    1.25 
  -8   8   0   47.43    1.35 
  -8   8   0   43.04    1.43 
  -8  -8   0   46.73    1.17 
  -8   8   0   46.80    1.36 
  -8  -8   0   47.62    1.19 
  -8   8   0   48.07    1.33 
  -8  -8   0   47.25    1.19 
   8  -9   0    2.79    0.25 
   8   9   0    2.99    0.25 
   8   9   0    2.81    0.23 
   8  -9   0    3.08    0.25 
  -8  -9   0    2.89    0.19 
  -8   9   0    2.37    0.26 
  -8  -9   0    2.80    0.17 
  -8   9   0    2.75    0.30 
  -8  -9   0    2.79    0.15 
  -8   9   0    2.69    0.31 
  -8   9   0    1.98    0.42 
  -8   9   0    2.14    0.27 
   8  10   0    0.27    0.13 
   8  10   0    0.53    0.14 
   8 -10   0    0.45    0.14 
   8 -10   0    0.33    0.14 
  -8  10   0    0.06    0.22 
  -8  10   0    0.11    0.18 
  -8  10   0    0.29    0.18 
  -8  10   0    0.52    0.23 
  -8 -10   0    0.35    0.06 
  -8 -10   0    0.42    0.06 
   8 -11   0   -0.09    0.13 
   8  11   0    0.00    0.13 
   8  11   0    0.23    0.14 
   8 -11   0   -0.07    0.12 
  -8  11   0    0.24    0.21 
  -8  11   0   -0.41    0.22 
  -8  11   0    0.16    0.22 
  -8  11   0   -0.19    0.23 
  -8  11   0    0.09    0.24 
   8  12   0    1.61    0.15 
   8  12   0    1.75    0.18 
   8 -12   0    1.59    0.16 
   8  12   0    1.58    0.14 
   8 -12   0    1.24    0.16 
   8  12   0    1.70    0.21 
   8  12   0    1.38    0.21 
  -8  12   0    1.31    0.30 
  -8  12   0    1.80    0.29 
  -8  12   0    1.34    0.31 
  -8  12   0    1.78    0.30 
   8  13   0    3.74    0.36 
   8  13   0    3.28    0.29 
   8  13   0    3.26    0.37 
  -8  13   0    3.23    0.41 
  -8  13   0    3.62    0.39 
  -8  13   0    2.82    0.44 
   8  14   0   27.77    0.89 
   8  14   0   27.90    0.95 
  -8  14   0   27.76    1.16 
  -8  14   0   29.42    1.15 
  -8  14   0   29.67    1.05 
   9   0   0    0.04    0.11 
   9   0   0    0.16    0.10 
   9   0   0   -0.02    0.10 
   9   0   0    0.09    0.11 
  -9   0   0    0.04    0.12 
  -9   0   0    0.04    0.10 
  -9   0   0    0.05    0.09 
  -9   0   0    0.05    0.07 
  -9   0   0    0.00    0.11 
   9  -1   0    9.06    0.38 
   9  -1   0    8.30    0.38 
   9   1   0    8.72    0.37 
   9  -1   0    8.68    0.39 
   9  -1   0    9.11    0.39 
   9   1   0    8.33    0.37 
   9   1   0    9.05    0.38 
   9   1   0    8.32    0.37 
  -9  -1   0    8.04    0.41 
  -9  -1   0    8.93    0.41 
  -9   1   0    8.48    0.43 
  -9  -1   0    8.85    0.36 
  -9   1   0    8.76    0.32 
  -9   1   0    8.48    0.41 
  -9   1   0    8.49    0.37 
  -9   1   0    8.48    0.36 
  -9  -1   0    8.97    0.27 
   9   2   0    3.44    0.25 
   9  -2   0    3.44    0.25 
   9   2   0    3.65    0.25 
   9  -2   0    3.96    0.27 
   9   2   0    3.70    0.26 
   9   2   0    3.52    0.26 
   9  -2   0    4.33    0.28 
   9  -2   0    3.45    0.26 
  -9   2   0    3.76    0.26 
  -9   2   0    3.50    0.23 
  -9  -2   0    4.23    0.24 
  -9  -2   0    3.64    0.29 
  -9   2   0    3.72    0.26 
  -9   2   0    3.50    0.32 
  -9  -2   0    4.20    0.28 
  -9   2   0    4.10    0.31 
   9  -3   0    1.81    0.20 
   9  -3   0    1.53    0.18 
   9   3   0    1.89    0.22 
   9  -3   0    1.93    0.20 
   9   3   0    1.33    0.27 
   9   3   0    1.64    0.17 
   9   3   0    1.77    0.21 
  -9  -3   0    2.07    0.25 
  -9   3   0    1.83    0.22 
  -9   3   0    1.92    0.23 
  -9   3   0    1.88    0.21 
  -9   3   0    1.63    0.24 
  -9  -3   0    1.83    0.22 
  -9  -3   0    2.07    0.19 
  -9   3   0    2.09    0.23 
   9   4   0   49.80    1.33 
   9   4   0   51.12    1.35 
   9  -4   0   52.69    1.40 
   9  -4   0   49.56    1.36 
   9  -4   0   52.18    1.37 
   9   4   0   51.70    1.34 
  -9   4   0   50.94    1.44 
  -9   4   0   50.87    1.37 
  -9  -4   0   51.57    1.37 
  -9  -4   0   50.57    1.31 
  -9  -4   0   50.16    1.36 
  -9   4   0   50.58    1.38 
  -9   4   0   42.49    1.36 
  -9   4   0   52.86    1.44 
   9  -5   0   -0.07    0.13 
   9   5   0   -0.06    0.11 
   9  -5   0   -0.08    0.13 
   9   5   0    0.01    0.12 
   9   5   0    0.07    0.11 
   9  -5   0   -0.21    0.12 
   9   5   0    0.00    0.11 
  -9  -5   0    0.05    0.08 
  -9  -5   0    0.09    0.11 
  -9   5   0    0.05    0.14 
  -9   5   0    0.13    0.16 
  -9   5   0   -0.10    0.16 
  -9   5   0    0.08    0.14 
  -9  -5   0   -0.04    0.12 
   9  -6   0   10.59    0.46 
   9   6   0   11.36    0.45 
   9  -6   0   11.30    0.48 
   9   6   0   11.39    0.43 
   9   6   0   11.62    0.43 
   9  -6   0   11.52    0.50 
   9   6   0   11.29    0.43 
  -9  -6   0   11.56    0.44 
  -9   6   0    9.93    0.61 
  -9   6   0   11.79    0.54 
  -9  -6   0   11.86    0.40 
  -9   6   0   11.08    0.51 
  -9   6   0   11.94    0.51 
  -9  -6   0   11.68    0.44 
   9   7   0    7.98    0.36 
   9   7   0    8.10    0.37 
   9   7   0    8.23    0.35 
   9  -7   0    8.04    0.44 
   9  -7   0    7.89    0.38 
   9  -7   0    8.15    0.40 
  -9   7   0    7.97    0.47 
  -9  -7   0    6.91    0.32 
  -9   7   0    7.68    0.46 
  -9  -7   0    7.87    0.31 
  -9   7   0    7.68    0.44 
  -9   7   0    7.81    0.46 
  -9  -7   0    7.57    0.34 
   9  -8   0   -0.12    0.18 
   9   8   0    0.00    0.12 
   9  -8   0    0.11    0.15 
   9   8   0   -0.05    0.13 
   9  -8   0   -0.07    0.14 
   9   8   0   -0.03    0.13 
  -9  -8   0   -0.08    0.09 
  -9   8   0    0.14    0.18 
  -9   8   0    0.04    0.19 
  -9   8   0    0.26    0.18 
  -9  -8   0    0.07    0.10 
  -9   8   0   -0.04    0.16 
  -9   8   0    0.04    0.17 
   9   9   0    1.07    0.17 
   9  -9   0    1.26    0.19 
   9  -9   0    0.87    0.23 
   9  -9   0    1.35    0.20 
   9   9   0    1.20    0.17 
   9   9   0    1.30    0.18 
  -9   9   0    1.00    0.23 
  -9   9   0    0.86    0.23 
  -9  -9   0    1.19    0.15 
  -9   9   0    0.78    0.24 
  -9  -9   0    1.27    0.14 
  -9   9   0    0.87    0.24 
  -9  -9   0    1.30    0.13 
  -9   9   0    1.32    0.24 
   9  10   0    4.68    0.33 
   9 -10   0    5.50    0.35 
   9 -10   0    5.19    0.34 
   9  10   0    5.37    0.32 
   9  10   0    4.81    0.33 
  -9  10   0    5.14    0.47 
  -9  10   0    5.01    0.45 
  -9  10   0    5.27    0.46 
  -9 -10   0    5.13    0.22 
  -9  10   0    4.36    0.48 
   9  11   0    1.41    0.22 
   9  11   0    1.78    0.21 
   9 -11   0    1.57    0.20 
   9  11   0    1.52    0.21 
   9 -11   0    1.82    0.22 
  -9  11   0    1.99    0.34 
  -9  11   0    1.95    0.33 
  -9  11   0    1.47    0.29 
  -9  11   0    1.80    0.34 
   9 -12   0    0.75    0.19 
   9  12   0    0.93    0.20 
   9 -12   0    0.64    0.18 
   9  12   0    0.49    0.22 
   9  12   0    0.57    0.21 
  -9  12   0    1.04    0.30 
  -9  12   0    0.28    0.30 
  -9  12   0    0.38    0.31 
  -9  12   0    0.73    0.29 
   9  13   0   19.21    0.81 
   9  13   0   18.60    0.71 
   9  13   0   19.28    0.71 
  -9  13   0   19.43    0.95 
  -9  13   0   17.80    0.89 
  -9  13   0   19.59    0.86 
  10   0   0   57.52    1.47 
  10   0   0   56.20    1.48 
  10   0   0   55.19    1.47 
  10   0   0   53.63    1.46 
 -10   0   0   48.13    1.48 
 -10   0   0   54.29    1.51 
 -10   0   0   55.19    1.35 
 -10   0   0   53.96    1.43 
 -10   0   0   53.57    1.45 
  10   1   0    2.28    0.25 
  10   1   0    2.13    0.25 
  10   1   0    2.17    0.23 
  10  -1   0    1.32    0.17 
  10  -1   0    1.68    0.20 
  10   1   0    1.74    0.20 
  10  -1   0    2.46    0.27 
  10  -1   0    2.18    0.25 
 -10   1   0    2.12    0.24 
 -10  -1   0    2.04    0.26 
 -10   1   0    2.23    0.26 
 -10   1   0    1.90    0.20 
 -10   1   0    1.62    0.22 
 -10   1   0    2.23    0.20 
 -10  -1   0    2.07    0.13 
 -10  -1   0    2.09    0.23 
  10  -2   0    0.46    0.15 
  10  -2   0    0.30    0.24 
  10   2   0    0.50    0.14 
  10   2   0    0.47    0.14 
  10  -2   0    0.62    0.16 
  10   2   0    0.38    0.13 
  10   2   0    0.29    0.13 
 -10  -2   0    0.18    0.15 
 -10   2   0    0.38    0.13 
 -10   2   0    0.43    0.12 
 -10  -2   0    0.32    0.13 
 -10   2   0    0.31    0.17 
 -10   2   0    0.36    0.17 
 -10   2   0    0.42    0.15 
  10   3   0    0.70    0.17 
  10  -3   0    0.41    0.15 
  10   3   0    0.64    0.16 
  10  -3   0    0.50    0.15 
  10   3   0    0.80    0.16 
  10   3   0    0.54    0.15 
 -10   3   0    0.56    0.14 
 -10   3   0    0.14    0.12 
 -10   3   0    0.88    0.24 
 -10  -3   0    0.61    0.14 
 -10   3   0    0.74    0.20 
 -10  -3   0    0.32    0.16 
 -10  -3   0    0.37    0.14 
 -10   3   0    0.50    0.16 
  10   4   0   51.82    1.34 
  10   4   0   47.71    1.33 
  10  -4   0   47.01    1.34 
  10  -4   0   49.48    1.38 
  10   4   0   49.66    1.31 
  10   4   0   48.58    1.32 
 -10   4   0   51.48    1.44 
 -10  -4   0   49.48    1.29 
 -10  -4   0   49.94    1.35 
 -10   4   0   40.36    1.47 
 -10   4   0   49.66    1.34 
 -10   4   0   49.34    1.44 
  10   5   0    1.32    0.17 
  10  -5   0    1.40    0.23 
  10   5   0    1.23    0.18 
  10  -5   0    1.03    0.19 
  10   5   0    1.26    0.17 
  10   5   0    1.26    0.18 
 -10  -5   0    1.10    0.15 
 -10   5   0    1.34    0.25 
 -10  -5   0    1.04    0.19 
 -10   5   0    1.33    0.22 
 -10   5   0    0.73    0.22 
 -10   5   0    1.20    0.20 
  10   6   0   26.54    0.81 
  10   6   0   25.57    0.81 
  10   6   0   26.30    0.80 
  10   6   0   26.64    0.79 
  10  -6   0   25.82    0.83 
  10  -6   0   26.51    0.89 
 -10   6   0   26.78    0.88 
 -10   6   0   25.86    0.88 
 -10   6   0   25.00    0.93 
 -10   6   0   25.89    0.91 
 -10  -6   0   25.50    0.80 
 -10  -6   0   26.86    0.76 
  10  -7   0    1.08    0.20 
  10   7   0    1.35    0.20 
  10  -7   0    1.48    0.25 
  10   7   0    1.45    0.20 
  10   7   0    1.30    0.19 
  10   7   0    1.27    0.19 
 -10  -7   0    1.50    0.18 
 -10  -7   0    1.40    0.16 
 -10   7   0    0.94    0.24 
 -10   7   0    1.21    0.23 
 -10   7   0    1.05    0.23 
 -10   7   0    0.89    0.24 
 -10   7   0    1.28    0.25 
  10  -8   0    0.35    0.18 
  10   8   0    0.43    0.17 
  10  -8   0    0.27    0.21 
  10   8   0    0.36    0.17 
  10   8   0    0.55    0.17 
  10   8   0    0.52    0.17 
 -10  -8   0    0.24    0.11 
 -10   8   0    0.46    0.23 
 -10   8   0    0.43    0.22 
 -10   8   0    0.41    0.22 
 -10   8   0    0.33    0.18 
 -10   8   0    0.10    0.21 
 -10  -8   0    0.50    0.12 
  10  -9   0    0.27    0.18 
  10   9   0    0.18    0.17 
  10   9   0    0.08    0.15 
  10   9   0    0.17    0.16 
  10   9   0   -0.10    0.16 
 -10   9   0    0.21    0.22 
 -10  -9   0    0.11    0.11 
 -10   9   0   -0.14    0.22 
 -10   9   0   -0.23    0.22 
 -10  -9   0    0.00    0.12 
 -10   9   0   -0.26    0.22 
  10  10   0    1.93    0.23 
  10  10   0    1.61    0.24 
  10  10   0    2.00    0.25 
  10 -10   0    1.75    0.24 
  10  10   0    1.86    0.24 
 -10  10   0    2.12    0.35 
 -10 -10   0    1.90    0.19 
 -10  10   0    1.47    0.33 
 -10  10   0    1.45    0.30 
 -10  10   0    1.86    0.31 
  10  11   0    8.53    0.48 
  10 -11   0    8.50    0.46 
  10  11   0    8.99    0.47 
  10  11   0    8.99    0.49 
  10  11   0    7.53    0.47 
 -10  11   0    8.81    0.63 
 -10  11   0    7.14    0.66 
 -10  11   0    8.45    0.65 
 -10  11   0    8.83    0.63 
  10  12   0    8.23    0.48 
  10  12   0    8.45    0.57 
  10 -12   0    8.05    0.45 
 -10  12   0    7.43    0.65 
 -10  12   0    8.39    0.68 
 -10  12   0    8.51    0.72 
  10  13   0    7.76    0.53 
  10  13   0    7.58    0.68 
  11   0   0    0.06    0.14 
  11   0   0    0.03    0.15 
  11   0   0    0.01    0.14 
  11   0   0    0.28    0.16 
 -11   0   0    0.34    0.15 
 -11   0   0    0.04    0.17 
 -11   0   0    0.07    0.09 
 -11   0   0    0.23    0.18 
 -11   0   0   -0.02    0.12 
  11   1   0    4.43    0.34 
  11  -1   0    4.42    0.34 
  11  -1   0    3.06    0.31 
  11   1   0    4.46    0.35 
  11   1   0    5.22    0.35 
  11  -1   0    4.98    0.36 
  11  -1   0    4.25    0.34 
  11   1   0    4.10    0.35 
 -11   1   0    4.52    0.26 
 -11   1   0    4.56    0.34 
 -11   1   0    5.32    0.40 
 -11  -1   0    4.22    0.40 
 -11  -1   0    4.40    0.18 
 -11  -1   0    4.23    0.16 
 -11   1   0    4.38    0.42 
  11  -2   0   35.24    1.06 
  11   2   0   36.07    1.06 
  11   2   0   36.52    1.05 
  11   2   0   34.99    1.06 
  11  -2   0   35.32    1.08 
 -11  -2   0   35.00    1.10 
 -11   2   0   35.49    1.15 
 -11   2   0   36.81    1.00 
 -11   2   0   36.55    1.14 
 -11   2   0   35.51    1.05 
  11   3   0    2.27    0.25 
  11   3   0    3.09    0.30 
  11  -3   0    2.66    0.28 
  11  -3   0    2.86    0.30 
  11   3   0    2.69    0.32 
  11   3   0    2.84    0.30 
 -11  -3   0    2.70    0.30 
 -11   3   0    2.87    0.29 
 -11   3   0    2.39    0.29 
 -11   3   0    2.66    0.40 
 -11  -3   0    2.70    0.26 
 -11   3   0    2.19    0.24 
  11  -4   0   70.89    1.97 
  11  -4   0   71.10    1.93 
  11  -4   0   72.04    1.94 
  11   4   0   72.40    1.92 
  11   4   0   70.88    1.95 
  11   4   0   72.60    1.91 
  11   4   0   73.55    1.91 
 -11   4   0   75.52    2.04 
 -11   4   0   82.66    2.18 
 -11   4   0   72.47    2.03 
 -11   4   0   73.83    1.92 
 -11   4   0   72.62    1.95 
 -11  -4   0   74.11    1.88 
 -11  -4   0   74.71    1.96 
 -11  -4   0   72.43    1.94 
  11   5   0    0.20    0.17 
  11  -5   0    0.20    0.19 
  11   5   0    0.14    0.16 
  11   5   0    0.26    0.18 
  11  -5   0   -0.10    0.18 
  11  -5   0    0.16    0.22 
  11   5   0    0.26    0.16 
 -11  -5   0    0.05    0.18 
 -11   5   0   -0.14    0.20 
 -11  -5   0    0.35    0.16 
 -11   5   0    0.39    0.22 
 -11   5   0   -0.10    0.17 
 -11   5   0    0.29    0.18 
 -11  -5   0    0.05    0.12 
  11  -6   0    9.19    0.48 
  11  -6   0    9.74    0.52 
  11   6   0    9.18    0.46 
  11   6   0    8.21    0.54 
  11  -6   0    9.11    0.55 
  11   6   0    8.48    0.45 
  11   6   0    9.23    0.45 
 -11   6   0    8.40    0.57 
 -11  -6   0    8.86    0.46 
 -11   6   0    9.09    0.52 
 -11   6   0    9.44    0.58 
 -11  -6   0    9.25    0.40 
 -11  -6   0    9.32    0.47 
 -11   6   0    8.95    0.52 
  11  -7   0    0.87    0.23 
  11   7   0    0.75    0.21 
  11  -7   0    0.77    0.24 
  11   7   0    0.80    0.21 
  11   7   0    0.55    0.35 
  11   7   0    0.98    0.20 
 -11  -7   0    0.84    0.16 
 -11   7   0    0.80    0.26 
 -11  -7   0    0.86    0.18 
 -11   7   0    0.68    0.29 
 -11   7   0    1.15    0.29 
 -11   7   0    0.43    0.22 
 -11  -7   0    1.07    0.19 
  11  -8   0    0.09    0.23 
  11   8   0    0.13    0.21 
  11   8   0    0.12    0.20 
  11   8   0   -0.05    0.20 
  11   8   0   -0.02    0.19 
  11  -8   0   -0.02    0.20 
 -11   8   0   -0.01    0.23 
 -11  -8   0   -0.08    0.17 
 -11   8   0    0.25    0.24 
 -11  -8   0    0.16    0.13 
 -11   8   0    0.19    0.28 
 -11   8   0    0.02    0.26 
  11   9   0    4.30    0.40 
  11   9   0    4.66    0.43 
  11   9   0    4.91    0.41 
  11  -9   0    5.21    0.46 
  11   9   0    4.31    0.41 
  11  -9   0    5.11    0.42 
 -11   9   0    4.02    0.49 
 -11   9   0    4.44    0.54 
 -11  -9   0    4.10    0.32 
 -11   9   0    3.78    0.42 
 -11   9   0    4.54    0.55 
  11  10   0   21.85    0.80 
  11  10   0   22.91    0.81 
  11 -10   0   22.77    0.79 
  11  10   0   22.26    0.79 
  11 -10   0   21.74    0.82 
  11  10   0   22.53    0.78 
 -11  10   0   22.86    0.93 
 -11  10   0   22.04    0.96 
 -11  10   0   23.55    0.98 
 -11 -10   0   22.51    0.68 
 -11  10   0   22.78    0.98 
  11  11   0    1.90    0.29 
  11 -11   0    2.33    0.32 
  11 -11   0    1.82    0.28 
  11  11   0    1.64    0.29 
 -11  11   0    1.24    0.33 
 -11  11   0    2.23    0.42 
 -11  11   0    2.00    0.41 
 -11 -11   0    2.04    0.22 
  12   0   0    6.04    0.42 
  12   0   0    6.49    0.43 
  12   0   0    6.64    0.43 
  12   0   0    6.89    0.46 
 -12   0   0    6.72    0.51 
 -12   0   0    7.23    0.49 
 -12   0   0    6.93    0.28 
 -12   0   0    7.31    0.43 
  12  -1   0   13.83    0.59 
  12   1   0   12.91    0.58 
  12   1   0   12.72    0.58 
  12  -1   0   13.48    0.58 
  12  -1   0   13.22    0.60 
  12   1   0   12.84    0.58 
  12   1   0   13.58    0.59 
 -12   1   0   13.53    0.56 
 -12   1   0   12.75    0.46 
 -12   1   0   12.88    0.64 
 -12  -1   0   14.44    0.62 
 -12   1   0   13.37    0.57 
 -12  -1   0   13.24    0.63 
 -12  -1   0   13.48    0.65 
 -12   1   0   13.64    0.67 
  12  -2   0    0.80    0.23 
  12   2   0    0.85    0.20 
  12  -2   0    0.92    0.24 
  12   2   0    0.71    0.21 
  12   2   0    0.49    0.21 
  12   2   0    0.79    0.21 
  12  -2   0    0.79    0.21 
 -12   2   0    0.66    0.23 
 -12  -2   0    0.50    0.22 
 -12  -2   0    0.67    0.27 
 -12   2   0    0.81    0.17 
 -12   2   0    0.68    0.20 
 -12   2   0    0.84    0.21 
 -12   2   0    0.60    0.26 
  12   3   0    8.07    0.47 
  12   3   0    8.30    0.47 
  12   3   0    7.34    0.46 
  12  -3   0    8.06    0.57 
  12   3   0    7.87    0.46 
  12  -3   0    7.31    0.46 
  12  -3   0    9.28    0.52 
 -12  -3   0    7.13    0.54 
 -12   3   0    8.90    0.44 
 -12   3   0    7.49    0.57 
 -12   3   0    7.85    0.47 
 -12   3   0    6.67    0.47 
 -12  -3   0    8.49    0.54 
 -12   3   0    7.43    0.54 
  12   4   0    2.29    0.27 
  12   4   0    2.38    0.27 
  12  -4   0    2.47    0.30 
  12   4   0    2.01    0.29 
  12  -4   0    1.65    0.28 
  12   4   0    2.30    0.26 
 -12   4   0    2.50    0.37 
 -12   4   0    2.56    0.28 
 -12   4   0    1.91    0.32 
 -12   4   0    2.24    0.30 
 -12  -4   0    2.22    0.30 
  12   5   0    5.52    0.40 
  12   5   0    5.24    0.45 
  12   5   0    5.93    0.43 
  12  -5   0    4.63    0.43 
  12   5   0    5.48    0.43 
 -12   5   0    6.12    0.54 
 -12   5   0    5.09    0.54 
 -12  -5   0    5.60    0.46 
 -12   5   0    6.06    0.47 
 -12   5   0    6.05    0.45 
  12   6   0    1.92    0.26 
  12   6   0    2.13    0.29 
  12   6   0    2.14    0.28 
  12  -6   0    2.27    0.30 
  12   6   0    2.82    0.30 
 -12   6   0    2.24    0.30 
 -12  -6   0    2.61    0.29 
 -12   6   0    2.79    0.34 
 -12   6   0    1.85    0.35 
 -12   6   0    2.31    0.37 
  12   7   0    1.15    0.25 
  12   7   0    1.62    0.27 
  12   7   0    1.34    0.27 
  12   7   0    1.48    0.29 
  12  -7   0    1.71    0.29 
 -12   7   0    1.16    0.34 
 -12   7   0    1.40    0.33 
 -12   7   0    1.08    0.28 
 -12   7   0    1.85    0.33 
  12   8   0    0.28    0.22 
  12  -8   0   -0.02    0.24 
  12   8   0    0.05    0.23 
  12   8   0   -0.14    0.23 
  12   8   0    0.10    0.26 
 -12   8   0    0.24    0.29 
 -12  -8   0   -0.04    0.20 
 -12   8   0    0.18    0.31 
 -12   8   0   -0.31    0.31 
 -12   8   0   -0.17    0.26 
  12   9   0   -0.13    0.23 
  12  -9   0    0.17    0.25 
  12   9   0    0.05    0.26 
  12   9   0   -0.05    0.23 
  12   9   0    0.18    0.29 
 -12   9   0    0.39    0.36 
 -12   9   0   -0.09    0.30 
 -12   9   0   -0.18    0.31 
 -12  -9   0   -0.02    0.18 
 -12   9   0   -0.32    0.31 
  12  10   0    2.19    0.33 
  12 -10   0    2.28    0.33 
  12  10   0    1.56    0.32 
 -12  10   0    2.65    0.55 
 -12  10   0    2.12    0.39 
 -12  10   0    2.60    0.44 
 -12  10   0    2.28    0.46 
  13   0   0    0.21    0.23 
  13   0   0    0.15    0.24 
  13   0   0    0.18    0.18 
 -13   0   0   -0.08    0.09 
 -13   0   0    0.15    0.11 
 -13   0   0    0.30    0.40 
  13   1   0    1.26    0.27 
  13   1   0    1.08    0.26 
  13   1   0    0.90    0.25 
  13  -1   0    0.75    0.26 
  13  -1   0    0.91    0.25 
 -13  -1   0    1.05    0.32 
 -13   1   0    1.24    0.33 
 -13   1   0    1.23    0.17 
 -13   1   0    1.53    0.25 
 -13  -1   0    0.69    0.29 
  13  -2   0    5.25    0.47 
  13   2   0    5.83    0.45 
  13   2   0    6.22    0.47 
  13  -2   0    6.28    0.53 
  13   2   0    6.12    0.50 
 -13   2   0    6.27    0.37 
 -13  -2   0    5.97    0.56 
 -13  -2   0    6.52    0.44 
 -13   2   0    6.14    0.46 
 -13   2   0    6.30    0.59 
  13   3   0    0.30    0.24 
  13   3   0    0.41    0.22 
  13  -3   0    0.25    0.24 
  13   3   0    0.45    0.24 
 -13   3   0    0.75    0.33 
 -13   3   0    0.63    0.21 
 -13  -3   0    0.32    0.19 
 -13   3   0    0.08    0.21 
 -13  -3   0    0.76    0.30 
  13   4   0   12.99    0.62 
  13  -4   0   13.34    0.63 
  13   4   0   13.96    0.64 
  13   4   0   13.24    0.64 
 -13  -4   0   13.78    0.69 
 -13   4   0   13.47    0.78 
 -13   4   0   13.18    0.60 
 -13  -4   0   12.41    0.57 
 -13   4   0   12.57    0.65 
  13   5   0    0.11    0.22 
  13  -5   0    0.10    0.25 
  13   5   0    0.12    0.23 
  13   5   0    0.23    0.25 
 -13   5   0    0.31    0.27 
 -13   5   0    0.16    0.32 
 -13  -5   0    0.28    0.28 
 -13   5   0    0.38    0.24 
 -13  -5   0   -0.46    0.18 
  13   6   0   20.62    0.80 
  13   6   0   21.76    0.82 
  13  -6   0   21.34    0.84 
  13   6   0   20.86    0.82 
 -13   6   0   20.17    0.87 
 -13  -6   0   20.99    0.74 
 -13   6   0   21.81    0.86 
 -13   6   0   20.50    0.98 
  13   7   0    1.07    0.27 
  13   7   0    0.88    0.29 
  13  -7   0    0.82    0.30 
  13   7   0    0.90    0.29 
 -13   7   0    0.82    0.30 
 -13   7   0    0.90    0.37 
 -13  -7   0    0.71    0.23 
 -13   7   0    0.62    0.28 
  13  -8   0    0.27    0.30 
  13   8   0    0.28    0.30 
  13   8   0    0.33    0.25 
 -13   8   0    0.68    0.32 
 -13   8   0    0.59    0.35 
 -13   8   0    0.26    0.37 
 -13  -8   0    0.07    0.23 
  13   9   0    1.25    0.31 
  13   9   0    1.43    0.35 
  13  -9   0    1.98    0.37 
  14   0   0   19.43    0.81 
 -14   0   0   19.99    0.94 
  14  -1   0    3.09    0.38 
  14   1   0    4.13    0.49 
  14   1   0    4.30    0.47 
 -14   1   0    3.99    0.51 
 -14  -1   0    4.41    0.49 
  14   2   0   -0.12    0.25 
  14  -2   0    0.01    0.26 
  14   2   0    0.11    0.32 
  14   2   0   -0.16    0.26 
 -14   2   0   -0.04    0.19 
 -14   2   0    0.17    0.27 
 -14   2   0    0.04    0.38 
 -14  -2   0    0.15    0.37 
  14   3   0    0.58    0.30 
  14   3   0    0.81    0.28 
  14   3   0    1.03    0.33 
  14  -3   0    0.78    0.30 
 -14  -3   0    0.59    0.34 
 -14   3   0    0.89    0.28 
 -14   3   0    0.67    0.24 
 -14   3   0    1.07    0.39 
  14   4   0    0.34    0.27 
  14   4   0    0.35    0.31 
  14  -4   0   -0.13    0.28 
  14   4   0    0.60    0.29 
 -14  -4   0    0.21    0.33 
 -14   4   0    0.78    0.42 
 -14   4   0    0.29    0.27 
 -14   4   0    0.19    0.26 
  14   5   0    8.29    0.59 
  14   5   0    7.84    0.60 
  14  -5   0    7.77    0.59 
  14   5   0    6.46    0.65 
 -14   5   0    7.76    0.60 
 -14   5   0    7.11    0.64 
 -14   5   0    8.73    0.79 
  14   6   0    5.45    0.59 
  14   6   0    5.06    0.58 
  14  -6   0    5.62    0.59 
 -14   6   0    5.83    0.62 
 -14   6   0    5.36    0.61 
 -14   6   0    5.17    0.63 
  15   0   0    0.05    0.33 
 -15   0   0    0.26    0.46 
  15   1   0   -0.76    0.32 
  15  -1   0    0.26    0.37 
 -15   1   0    0.25    0.42 
 -15  -1   0    0.15    0.43 
  15   2   0    0.25    0.35 
 -15  -2   0    0.99    0.44 
 -15   2   0    0.40    0.46 
  15   3   0    1.95    0.39 
  15   3   0    1.28    0.35 
 -15   3   0    1.10    0.47 
 -15   3   0    2.05    0.39 
   0  17  -1    1.68    0.39 
   0  17  -1    0.85    0.39 
   0  17  -1    0.67    0.19 
   0  16  -1    5.44    0.40 
   0  16  -1    5.87    0.59 
   0  16  -1    6.77    0.36 
   0  16  -1    6.95    0.61 
   0  15  -1    4.27    0.28 
   0  15  -1    4.09    0.49 
   0  15  -1    4.09    0.47 
   0  15  -1    4.35    0.32 
   0  14  -1    0.65    0.23 
   0  14  -1    0.94    0.15 
   0  14  -1    0.98    0.23 
   0  13  -1    4.68    0.42 
   0  13  -1    5.12    0.24 
   0  13  -1    4.78    0.39 
   0  12  -1   21.28    0.76 
   0  12  -1   20.96    0.51 
   0  12  -1   21.14    0.72 
   0  12  -1   20.90    0.57 
   0  11  -1   17.11    0.61 
   0  11  -1   17.95    0.49 
   0  11  -1   17.65    0.66 
   0  11  -1   17.43    0.48 
   0  11  -1   18.18    0.47 
   0  11  -1   17.73    0.44 
   0  10  -1    9.44    0.28 
   0  10  -1    9.46    0.39 
   0  10  -1    9.67    0.26 
   0  10  -1    9.62    0.29 
   0  10  -1    9.12    0.28 
   0   9  -1   20.25    0.64 
   0   9  -1   20.93    0.54 
   0   9  -1   21.42    0.53 
   0   9  -1   21.71    0.53 
   0   9  -1   21.34    0.55 
   0   8  -1   32.04    0.80 
   0   8  -1   33.05    0.79 
   0   8  -1   32.61    0.89 
   0   8  -1   33.02    0.82 
   0   7  -1    3.08    0.10 
   0   7  -1    3.04    0.18 
   0   7  -1    3.15    0.11 
   0   7  -1    2.93    0.11 
   0   6  -1    4.40    0.13 
   0   6  -1    4.31    0.12 
   0  -6   1    4.28    0.15 
   0   6  -1    4.37    0.13 
   0   6  -1    4.54    0.19 
   0   5  -1   45.40    1.11 
   0   5  -1   46.45    1.06 
   0  -5   1   40.51    1.08 
   0   5  -1   46.70    1.06 
   0   4  -1  263.99    6.11 
   0   4  -1  256.24    6.19 
   0   4  -1  260.96    6.07 
   0   4  -1  259.90    6.06 
   0   3  -1  983.27   22.45 
   0   3  -1  955.95   22.67 
   0   2  -1  116.56    2.68 
   0  -2   1  120.42    2.67 
   0   2  -1  114.94    2.69 
   0   2  -1  105.06    2.66 
   0   1  -1   40.54    0.97 
   0   1  -1   41.75    0.98 
   0   1   1   13.24    0.32 
   0   2   1  119.93    2.74 
   0   2   1  118.33    2.74 
   0  -2  -1  117.01    2.74 
   0   2   1  118.78    2.78 
   0  -2  -1  114.98    2.78 
   0  -2  -1  119.17    2.76 
   0   2   1  116.18    2.77 
   0  -3  -1  974.21   22.72 
   0   3   1 1000.00   22.87 
   0  -3  -1  976.26   22.83 
   0   3   1  964.37   22.95 
   0   4   1  258.29    6.01 
   0  -4  -1  251.71    6.02 
   0   4   1  263.76    6.10 
   0   4   1  254.68    6.03 
   0   5   1   46.76    1.14 
   0   5   1   45.37    1.16 
   0  -5  -1   45.79    1.13 
   0   5   1   46.03    1.10 
   0   5   1   46.13    1.09 
   0  -6  -1    4.28    0.17 
   0   6   1    4.29    0.21 
   0   6   1    4.23    0.18 
   0   6   1    4.34    0.13 
   0   6   1    4.25    0.14 
   0   7   1    2.88    0.09 
   0  -7  -1    2.89    0.15 
   0   7   1    3.06    0.11 
   0   7   1    3.14    0.20 
   0   7   1    2.85    0.17 
   0   8   1   32.94    0.89 
   0   8   1   33.10    0.93 
   0   8   1   32.84    0.79 
   0   8   1   33.14    0.80 
   0   8   1   32.96    0.78 
   0   8   1   32.14    0.79 
   0   9   1   21.47    0.53 
   0   9   1   21.09    0.68 
   0   9   1   21.18    0.53 
   0   9   1   21.13    0.64 
   0   9   1   21.15    0.52 
   0   9   1   21.06    0.53 
   0  10   1    9.15    0.25 
   0  10   1    8.94    0.41 
   0  10   1    9.27    0.38 
   0  10   1    9.19    0.26 
   0  10   1    9.45    0.28 
   0  10   1    9.58    0.25 
   0  11   1   17.69    0.60 
   0  11   1   17.28    0.47 
   0  11   1   17.64    0.65 
   0  11   1   17.74    0.48 
   0  12   1   21.04    0.57 
   0  12   1   20.82    0.56 
   0  12   1   21.36    0.75 
   0  12   1   20.75    0.71 
   0  13   1    4.95    0.41 
   0  13   1    4.79    0.22 
   0  13   1    4.86    0.37 
   0  13   1    4.47    0.24 
   0  14   1    1.09    0.16 
   0  14   1    1.27    0.23 
   0  14   1    0.84    0.13 
   0  14   1    1.22    0.26 
   0  15   1    4.76    0.28 
   0  15   1    4.73    0.52 
   0  15   1    4.53    0.31 
   0  15   1    3.97    0.47 
   0  15   1    4.27    0.30 
   0  16   1    6.21    0.40 
   0  16   1    6.28    0.58 
   0  16   1    6.40    0.37 
   0  16   1    6.34    0.60 
   0  17   1    0.62    0.39 
   0  17   1    0.76    0.36 
   0  17   1    0.93    0.21 
   1  17  -1    0.93    0.39 
   1  17  -1    1.48    0.22 
   1  17  -1    1.31    0.41 
  -1  17  -1    1.07    0.21 
  -1  17  -1    1.17    0.40 
  -1  17  -1    1.38    0.40 
   1  16  -1    4.39    0.34 
   1  16  -1    4.87    0.32 
   1  16  -1    3.81    0.41 
   1  16  -1    4.73    0.58 
  -1  16  -1    4.45    0.41 
  -1  16  -1    4.98    0.47 
  -1  16  -1    5.33    0.57 
  -1  16  -1    4.69    0.49 
   1  15  -1    7.34    0.33 
   1  15  -1    8.09    0.56 
   1  15  -1    7.98    0.54 
   1  15  -1    7.11    0.33 
  -1  15  -1    7.48    0.40 
  -1  15  -1    7.49    0.56 
  -1  15  -1    7.33    0.58 
   1  14  -1    0.71    0.12 
   1  14  -1    0.59    0.22 
   1  14  -1    0.69    0.12 
   1  14  -1    0.50    0.21 
  -1  14  -1    0.59    0.24 
  -1  14  -1    0.65    0.07 
  -1  14  -1    0.54    0.25 
  -1  14  -1    0.61    0.09 
  -1  14  -1    0.65    0.17 
   1  13  -1    2.36    0.26 
   1  13  -1    2.87    0.17 
   1  13  -1    2.68    0.19 
  -1  13  -1    2.89    0.18 
  -1  13  -1    2.80    0.34 
  -1  13  -1    2.49    0.32 
  -1  13  -1    2.95    0.24 
  -1  13  -1    2.93    0.14 
   1  12  -1   20.29    0.51 
   1  12  -1   19.45    0.56 
   1  12  -1   20.22    0.68 
   1  12  -1   19.62    0.72 
  -1  12  -1   19.55    0.57 
  -1  12  -1   19.06    0.69 
  -1  12  -1   19.32    0.55 
  -1  12  -1   19.61    1.00 
  -1  12  -1   19.23    0.51 
   1  11  -1   16.21    0.60 
   1  11  -1   16.07    0.42 
   1  11  -1   15.86    0.56 
   1  11  -1   16.27    0.41 
  -1  11  -1   15.94    0.46 
  -1  11  -1   15.74    0.46 
  -1  11  -1   16.48    0.47 
  -1  11  -1   14.44    0.45 
  -1  11  -1   15.65    0.58 
   1  10  -1   29.30    0.87 
   1  10  -1   30.70    0.74 
   1  10  -1   30.23    0.75 
  -1  10  -1   31.96    0.78 
  -1  10  -1   31.07    0.80 
  -1  10  -1   31.04    0.81 
  -1  10  -1   30.52    0.90 
  -1  10  -1   31.51    0.80 
   1   9  -1   24.21    0.58 
   1   9  -1   23.97    0.59 
   1   9  -1   23.31    0.70 
  -1   9  -1   24.12    0.73 
  -1   9  -1   24.84    0.64 
  -1   9  -1   25.00    0.63 
  -1   9  -1   25.31    0.66 
  -1   9  -1   24.44    0.64 
   1   8  -1   15.51    0.36 
   1   8  -1   15.18    0.38 
   1   8  -1   15.22    0.47 
  -1   8  -1   15.01    0.41 
  -1   8  -1   14.38    0.41 
  -1   8  -1   14.92    0.41 
  -1   8  -1   15.00    0.49 
  -1   8  -1   14.85    0.44 
   1  -7   1   78.17    1.89 
   1   7  -1   77.22    1.89 
   1   7  -1   79.50    1.80 
  -1   7  -1   76.37    1.85 
  -1   7  -1   76.78    1.84 
  -1   7  -1   77.96    1.87 
  -1   7  -1   75.97    1.92 
  -1   7  -1   78.02    1.84 
   1   6  -1   27.10    0.72 
   1   6  -1   28.18    0.65 
   1  -6   1   27.70    0.73 
  -1   6  -1   27.19    0.70 
  -1   6  -1   27.57    0.68 
  -1  -6   1   27.88    0.67 
  -1   6  -1   27.11    0.74 
  -1   6  -1   27.95    0.69 
   1  -5   1    8.19    0.27 
   1   5  -1    8.21    0.26 
   1   5  -1    8.84    0.21 
  -1   5  -1    8.32    0.25 
  -1   5  -1    8.62    0.23 
  -1   5  -1    8.47    0.24 
  -1  -5   1    8.28    0.22 
  -1   5  -1    8.01    0.28 
   1  -4   1   39.56    1.01 
   1   4  -1   45.53    1.00 
   1  -4   1   41.86    1.05 
   1  -4   1   44.74    1.00 
   1  -4   1   36.45    1.03 
  -1  -4   1   43.04    1.00 
  -1   4  -1   43.46    1.03 
  -1   4  -1   43.87    1.06 
  -1   4  -1   43.07    1.02 
  -1   4  -1   44.40    1.03 
   1  -3   1  104.54    2.42 
   1   3  -1  106.89    2.43 
   1   3  -1   87.88    2.45 
   1  -3   1  104.88    2.42 
   1  -3   1  101.20    2.43 
   1  -3   1  103.56    2.41 
  -1   3  -1  105.32    2.40 
  -1   3  -1  105.94    2.41 
  -1   3  -1  102.58    2.43 
  -1  -3   1  101.30    2.43 
  -1   3  -1  106.88    2.42 
   1  -2   1  116.53    2.79 
   1  -2   1  118.80    2.80 
   1   2  -1  122.39    2.82 
   1  -2   1  121.13    2.81 
   1  -2   1  122.26    2.82 
   1   2  -1  122.29    2.78 
   1   2  -1  120.55    2.80 
  -1   2  -1  116.77    2.78 
  -1   2  -1  119.15    2.81 
  -1   2  -1  116.64    2.78 
  -1   2  -1  115.08    2.79 
   1  -1   1  189.32    4.37 
   1  -1   1  187.96    4.36 
   1   1  -1  187.55    4.32 
   1   1  -1  178.74    4.33 
   1   1  -1  185.50    4.30 
   1   1  -1  185.83    4.33 
  -1   1  -1  177.20    4.38 
  -1  -1   1  181.69    4.29 
  -1   1  -1  180.12    4.35 
  -1  -1   1  184.84    4.32 
   1   0   1   82.07    2.06 
   1   0  -1   93.97    2.09 
   1   0  -1   85.65    2.04 
   1   0   1   91.53    2.05 
  -1   0  -1   77.08    2.06 
   1   1   1  153.06    4.24 
   1   1   1  183.19    4.18 
   1  -1  -1  185.37    4.26 
   1  -1  -1  182.44    4.24 
   1  -1  -1  190.43    4.26 
   1   1   1  152.37    4.20 
   1   1   1  185.31    4.17 
  -1  -1  -1  185.65    4.20 
  -1  -1  -1  184.24    4.18 
  -1  -1  -1  165.63    4.18 
  -1   1   1  186.51    4.23 
   1  -2  -1  118.59    2.77 
   1  -2  -1  102.98    2.78 
   1   2   1  110.95    2.82 
   1  -2  -1  117.00    2.73 
   1   2   1  119.07    2.73 
   1   2   1  116.98    2.77 
   1  -2  -1  111.12    2.73 
  -1   2   1  118.40    2.75 
  -1  -2  -1  117.49    2.77 
  -1   2   1  117.27    2.73 
  -1   2   1  120.79    2.74 
  -1   2   1  120.64    2.77 
  -1  -2  -1  122.67    2.74 
  -1   2   1  115.90    2.73 
  -1  -2  -1  119.91    2.74 
   1   3   1  106.01    2.45 
   1   3   1  106.27    2.41 
   1  -3  -1  106.11    2.41 
   1   3   1  104.30    2.44 
   1  -3  -1  100.63    2.44 
   1   3   1  102.02    2.44 
   1  -3  -1   89.00    2.46 
   1  -3  -1  102.47    2.44 
  -1   3   1  105.12    2.42 
  -1   3   1  104.28    2.45 
  -1  -3  -1  104.67    2.44 
  -1   3   1  105.45    2.43 
  -1   3   1  104.02    2.42 
  -1  -3  -1  106.06    2.41 
  -1   3   1  107.60    2.47 
   1  -4  -1   41.83    1.05 
   1  -4  -1   42.26    1.01 
   1   4   1   42.43    1.05 
   1   4   1   42.50    1.07 
   1  -4  -1   43.50    1.07 
  -1   4   1   45.09    1.03 
  -1   4   1   44.77    1.08 
  -1   4   1   43.63    1.05 
  -1   4   1   43.88    1.10 
  -1   4   1   44.02    1.04 
   1   5   1    8.45    0.28 
   1   5   1    8.13    0.26 
   1  -5  -1    8.43    0.27 
  -1   5   1    8.66    0.24 
  -1   5   1    8.51    0.28 
  -1   5   1    8.36    0.25 
  -1   5   1    8.25    0.30 
  -1   5   1    8.65    0.23 
  -1   5   1    8.88    0.26 
   1  -6  -1   27.17    0.73 
   1   6   1   26.51    0.74 
   1   6   1   26.32    0.72 
  -1   6   1   28.19    0.71 
  -1   6   1   27.38    0.77 
  -1   6   1   28.22    0.75 
  -1   6   1   28.43    0.70 
  -1   6   1   28.44    0.69 
  -1   6   1   28.55    0.68 
   1   7   1   75.44    1.89 
   1   7   1   77.24    1.92 
   1  -7  -1   77.63    1.90 
  -1   7   1   78.83    1.83 
  -1   7   1   79.45    1.95 
  -1   7   1   76.67    1.86 
  -1   7   1   77.83    1.84 
  -1   7   1   76.39    1.91 
  -1   7   1   78.57    1.86 
   1   8   1   14.45    0.46 
   1  -8  -1   15.14    0.46 
   1   8   1   14.88    0.49 
  -1   8   1   14.85    0.41 
  -1   8   1   14.77    0.52 
  -1   8   1   15.17    0.49 
  -1   8   1   14.94    0.42 
  -1   8   1   14.99    0.40 
  -1   8   1   15.04    0.42 
   1   9   1   24.75    0.70 
   1   9   1   24.32    0.74 
   1  -9  -1   24.54    0.69 
  -1   9   1   24.72    0.63 
  -1   9   1   24.34    0.64 
  -1   9   1   24.38    0.73 
  -1   9   1   24.28    0.64 
  -1   9   1   24.13    0.63 
  -1   9   1   24.32    0.77 
   1  10   1   31.16    0.86 
   1 -10  -1   30.44    0.84 
   1  10   1   31.16    0.90 
  -1  10   1   29.62    0.77 
  -1  10   1   30.08    0.88 
  -1  10   1   30.22    0.78 
  -1  10   1   29.91    0.77 
  -1  10   1   29.21    0.92 
   1  11   1   15.20    0.40 
   1  11   1   16.14    0.55 
   1  11   1   15.96    0.40 
   1  11   1   15.66    0.58 
   1  11   1   16.04    0.48 
  -1  11   1   15.64    0.43 
  -1  11   1   15.79    0.47 
  -1  11   1   16.17    0.44 
  -1  11   1   15.51    0.61 
  -1  11   1   15.80    0.46 
  -1  11   1   16.23    0.58 
   1  12   1   19.47    0.58 
   1  12   1   19.78    0.67 
   1  12   1   19.55    0.51 
   1  12   1   19.43    0.50 
   1  12   1   18.70    0.70 
  -1  12   1   20.45    0.52 
  -1  12   1   19.82    0.56 
  -1  12   1   20.11    0.57 
  -1  12   1   19.80    0.68 
  -1  12   1   20.24    0.51 
  -1  12   1   16.33    0.96 
   1  13   1    2.77    0.21 
   1  13   1    1.80    0.41 
   1  13   1    2.73    0.15 
   1  13   1    2.23    0.25 
   1  13   1    2.75    0.17 
  -1  13   1    2.48    0.21 
  -1  13   1    2.77    0.13 
  -1  13   1    2.81    0.13 
  -1  13   1    2.39    0.27 
  -1  13   1    2.45    0.23 
  -1  13   1    2.79    0.32 
   1  14   1    0.55    0.12 
   1  14   1    0.93    0.24 
   1  14   1    0.56    0.10 
   1  14   1    0.61    0.21 
   1  14   1    0.66    0.14 
  -1  14   1    0.51    0.13 
  -1  14   1    0.82    0.25 
  -1  14   1    0.82    0.17 
  -1  14   1    0.69    0.22 
   1  15   1    7.53    0.36 
   1  15   1    7.66    0.52 
   1  15   1    7.28    0.30 
   1  15   1    7.77    0.55 
   1  15   1    7.37    0.33 
  -1  15   1    7.75    0.60 
  -1  15   1    6.60    0.54 
  -1  15   1    7.90    0.40 
  -1  15   1    8.20    0.39 
   1  16   1    4.80    0.38 
   1  16   1    4.31    0.33 
   1  16   1    3.86    0.43 
   1  16   1    5.17    0.55 
  -1  16   1    4.37    0.41 
  -1  16   1    5.10    0.57 
  -1  16   1    6.68    0.64 
   1  17   1    1.52    0.41 
   1  17   1    1.29    0.38 
   1  17   1    1.26    0.23 
  -1  17   1    2.15    0.43 
  -1  17   1    1.44    0.44 
  -1  17   1    1.32    0.23 
   2  17  -1    4.38    0.50 
   2  17  -1    3.12    0.45 
  -2  17  -1    3.75    0.53 
  -2  17  -1    2.93    0.45 
  -2  17  -1    3.17    0.37 
   2  16  -1    6.50    0.36 
   2  16  -1    7.75    0.60 
   2  16  -1    6.79    0.61 
  -2  16  -1    7.00    0.53 
  -2  16  -1    7.14    0.26 
  -2  16  -1    7.18    0.64 
  -2  16  -1    7.49    0.49 
  -2  16  -1    6.06    0.66 
   2  15  -1    3.25    0.36 
   2  15  -1    2.29    0.24 
   2  15  -1    2.39    0.21 
   2  15  -1    2.40    0.32 
  -2  15  -1    2.74    0.21 
  -2  15  -1    1.97    0.35 
  -2  15  -1    2.88    0.30 
  -2  15  -1    2.66    0.27 
  -2  15  -1    1.97    0.35 
  -2  15  -1    2.75    0.17 
   2  14  -1    9.36    0.53 
   2  14  -1    9.87    0.31 
   2  14  -1    9.57    0.36 
   2  14  -1    9.15    0.52 
  -2  14  -1    9.94    0.32 
  -2  14  -1    9.42    0.44 
  -2  14  -1   10.61    0.56 
  -2  14  -1    8.81    0.51 
  -2  14  -1   10.26    0.62 
  -2  14  -1   10.08    0.47 
   2  13  -1    7.75    0.29 
   2  13  -1    7.47    0.23 
   2  13  -1    7.67    0.44 
  -2  13  -1    7.39    0.47 
  -2  13  -1    7.00    0.35 
  -2  13  -1    7.16    0.31 
  -2  13  -1    7.07    0.49 
  -2  13  -1    6.07    0.30 
   2  12  -1    8.20    0.23 
   2  12  -1    8.40    0.45 
   2  12  -1    8.43    0.41 
   2  12  -1    8.30    0.30 
  -2  12  -1    7.88    0.46 
  -2  12  -1    8.44    0.34 
  -2  12  -1    8.77    0.35 
  -2  12  -1    8.82    0.29 
  -2  12  -1    8.24    0.48 
   2  11  -1   10.47    0.34 
   2  11  -1   10.52    0.47 
   2  11  -1   10.44    0.43 
  -2  11  -1   11.33    0.37 
  -2  11  -1   10.97    0.48 
  -2  11  -1   10.59    0.39 
  -2  11  -1   10.85    0.34 
  -2  11  -1   11.43    0.39 
   2 -10   1   30.56    0.85 
   2  10  -1   28.79    0.84 
   2  10  -1   28.95    0.76 
   2  10  -1   28.98    0.87 
  -2  10  -1   28.84    0.88 
  -2  10  -1   29.87    0.77 
  -2  10  -1   28.89    0.78 
  -2  10  -1   29.68    0.79 
  -2  10  -1   29.95    0.81 
   2   9  -1    9.27    0.28 
   2  -9   1    9.28    0.35 
   2   9  -1    8.87    0.35 
  -2   9  -1    9.30    0.31 
  -2   9  -1    9.22    0.31 
  -2   9  -1    8.77    0.38 
  -2   9  -1    9.34    0.31 
  -2   9  -1    9.82    0.34 
   2   8  -1   19.81    0.58 
   2  -8   1   19.80    0.59 
   2   8  -1   20.49    0.52 
  -2   8  -1   19.82    0.62 
  -2   8  -1   19.83    0.55 
  -2   8  -1   20.05    0.55 
  -2   8  -1   19.80    0.55 
  -2   8  -1   20.11    0.58 
   2   7  -1    8.78    0.30 
   2  -7   1    9.49    0.32 
   2   7  -1    9.03    0.26 
  -2   7  -1    8.68    0.28 
  -2   7  -1    8.60    0.31 
  -2   7  -1    8.45    0.33 
  -2   7  -1    8.71    0.28 
  -2   7  -1    8.77    0.29 
   2  -6   1    9.28    0.32 
   2  -6   1    8.88    0.25 
   2  -6   1    8.95    0.24 
   2   6  -1    9.32    0.26 
   2   6  -1    9.30    0.23 
  -2   6  -1    9.47    0.29 
  -2   6  -1    9.57    0.33 
  -2   6  -1    9.20    0.29 
  -2   6  -1    9.62    0.30 
   2  -5   1   99.91    2.33 
   2  -5   1  100.75    2.39 
   2   5  -1   99.80    2.33 
   2  -5   1   96.99    2.38 
   2  -5   1   98.84    2.33 
  -2  -5   1  100.94    2.31 
  -2   5  -1  100.46    2.36 
  -2   5  -1  102.35    2.36 
  -2   5  -1  100.15    2.37 
  -2   5  -1   93.79    2.39 
   2   4  -1  183.79    4.33 
   2  -4   1  188.57    4.32 
   2   4  -1  183.04    4.30 
   2  -4   1  182.38    4.33 
   2  -4   1  183.88    4.28 
   2  -4   1  182.81    4.32 
  -2   4  -1  186.37    4.31 
  -2   4  -1  183.59    4.30 
  -2   4  -1  184.03    4.29 
  -2   4  -1  175.79    4.32 
  -2  -4   1  182.14    4.31 
  -2   4  -1  188.71    4.31 
   2   3  -1  194.60    4.52 
   2   3  -1  193.59    4.55 
   2  -3   1  192.31    4.51 
   2  -3   1  185.19    4.52 
   2  -3   1  190.21    4.52 
   2  -3   1  191.10    4.57 
  -2   3  -1  197.51    4.53 
  -2   3  -1  199.07    4.55 
  -2   3  -1  195.62    4.52 
  -2   3  -1  187.43    4.50 
  -2   3  -1  198.08    4.53 
  -2  -3   1  191.56    4.53 
   2   2  -1  457.06   11.00 
   2  -2   1  461.58   11.07 
   2  -2   1  441.00   11.04 
   2  -2   1  476.15   11.15 
   2  -2   1  471.01   11.06 
   2   2  -1  428.21   11.05 
   2  -2   1  489.09   11.11 
   2   2  -1  486.99   11.04 
  -2   2  -1  478.01   11.17 
  -2   2  -1  484.82   11.14 
  -2   2  -1  490.40   11.13 
  -2   2  -1  471.15   11.03 
  -2  -2   1  471.43   10.97 
   2   1  -1  574.66   13.16 
   2   1  -1  598.81   13.37 
   2  -1   1  550.60   13.31 
   2  -1   1  581.67   13.36 
   2   1  -1  572.75   13.28 
   2  -1   1  587.69   13.44 
   2   1  -1  554.42   13.27 
   2  -1   1  523.47   13.30 
  -2   1  -1  576.50   13.36 
  -2   1  -1  561.57   13.34 
  -2  -1   1  568.66   13.26 
  -2  -1   1  552.84   13.31 
  -2   1  -1  542.53   13.32 
  -2   1  -1  577.18   13.37 
  -2  -1   1  587.47   13.28 
   2   0   1   57.16    1.32 
   2   0  -1   56.98    1.33 
   2   0  -1   58.55    1.33 
   2   0  -1   57.21    1.32 
   2   0   1   57.78    1.33 
   2   0   1   51.84    1.33 
   2   0  -1   57.42    1.34 
   2   0   1   54.75    1.34 
  -2   0   1   53.27    1.33 
  -2   0   1   54.44    1.33 
  -2   0  -1   56.78    1.33 
  -2   0  -1   54.79    1.33 
  -2   0  -1   54.96    1.32 
  -2   0   1   57.18    1.34 
  -2   0   1   55.59    1.31 
  -2   0   1   54.34    1.32 
  -2   0  -1   56.51    1.34 
   2   1   1  561.05   13.35 
   2  -1  -1  545.08   13.37 
   2  -1  -1  594.66   13.47 
   2   1   1  578.55   13.39 
   2   1   1  583.11   13.31 
   2  -1  -1  555.90   13.36 
   2  -1  -1  585.44   13.38 
   2   1   1  601.03   13.27 
   2   1   1  569.37   13.22 
  -2  -1  -1  540.14   13.21 
  -2  -1  -1  555.54   13.26 
  -2   1   1  557.54   13.36 
  -2   1   1  577.81   13.42 
  -2  -1  -1  537.33   13.31 
  -2  -1  -1  591.07   13.36 
   2   2   1  488.20   11.10 
   2  -2  -1  467.98   11.20 
   2  -2  -1  459.11   11.10 
   2  -2  -1  443.91   11.11 
   2  -2  -1  467.56   11.10 
   2   2   1  455.12   11.10 
   2   2   1  485.77   11.04 
  -2   2   1  477.01   11.25 
  -2   2   1  448.40   11.12 
  -2   2   1  485.21   11.24 
  -2  -2  -1  469.63   11.13 
  -2  -2  -1  493.91   11.05 
  -2  -2  -1  490.80   11.07 
  -2   2   1  489.85   11.18 
   2   3   1  195.04    4.53 
   2  -3  -1  196.27    4.52 
   2  -3  -1  191.42    4.56 
   2  -3  -1  187.65    4.52 
   2   3   1  196.05    4.54 
   2  -3  -1  193.78    4.52 
   2   3   1  184.44    4.56 
  -2   3   1  187.55    4.50 
  -2   3   1  194.74    4.54 
  -2  -3  -1  192.62    4.61 
  -2  -3  -1  196.45    4.51 
  -2  -3  -1  196.30    4.52 
  -2   3   1  194.71    4.52 
  -2   3   1  195.57    4.57 
  -2   3   1  193.80    4.56 
   2   4   1  174.92    4.26 
   2  -4  -1  172.81    4.26 
   2  -4  -1  185.88    4.27 
   2  -4  -1  181.88    4.22 
   2   4   1  181.85    4.26 
   2  -4  -1  182.75    4.24 
  -2  -4  -1  182.81    4.22 
  -2  -4  -1  183.09    4.21 
  -2   4   1  180.41    4.26 
  -2   4   1  175.38    4.28 
  -2   4   1  184.45    4.27 
  -2   4   1  185.51    4.23 
  -2   4   1  178.89    4.26 
  -2   4   1  186.64    4.26 
   2  -5  -1  104.63    2.41 
   2   5   1  100.71    2.36 
   2   5   1   99.44    2.39 
   2  -5  -1  103.58    2.35 
   2  -5  -1  101.91    2.34 
   2   5   1   99.00    2.36 
  -2   5   1  100.66    2.38 
  -2   5   1   97.88    2.41 
  -2   5   1   97.46    2.39 
  -2   5   1  101.32    2.37 
  -2   5   1   95.54    2.44 
  -2   5   1   99.78    2.40 
   2   6   1    9.39    0.27 
   2   6   1    9.67    0.29 
   2  -6  -1    9.15    0.23 
   2  -6  -1    9.33    0.32 
   2   6   1    9.29    0.31 
  -2   6   1    8.86    0.30 
  -2   6   1    9.22    0.35 
  -2   6   1    8.85    0.32 
  -2   6   1    9.52    0.28 
  -2   6   1    9.02    0.29 
  -2   6   1    9.13    0.30 
   2   7   1    8.73    0.27 
   2  -7  -1    9.16    0.32 
   2   7   1    8.50    0.29 
   2   7   1    8.76    0.32 
  -2   7   1    9.00    0.29 
  -2   7   1    9.03    0.28 
  -2   7   1    8.78    0.30 
  -2   7   1    9.02    0.30 
  -2   7   1    8.34    0.33 
  -2   7   1    8.64    0.36 
   2   8   1   20.76    0.56 
   2   8   1   20.93    0.59 
   2   8   1   20.14    0.61 
   2  -8  -1   20.62    0.61 
  -2   8   1   21.53    0.58 
  -2   8   1   21.43    0.67 
  -2   8   1   20.11    0.58 
  -2   8   1   19.79    0.63 
  -2   8   1   20.92    0.56 
  -2   8   1   20.42    0.57 
   2   9   1    9.49    0.37 
   2   9   1    9.29    0.30 
   2  -9  -1    8.83    0.36 
   2   9   1    9.13    0.34 
  -2   9   1    9.26    0.30 
  -2   9   1    9.24    0.31 
  -2   9   1    9.02    0.31 
  -2   9   1    9.06    0.32 
  -2   9   1    9.01    0.41 
  -2   9   1    8.69    0.38 
   2  10   1   29.90    0.87 
   2  10   1   29.59    0.83 
   2  10   1   30.02    0.78 
   2 -10  -1   30.19    0.84 
  -2  10   1   29.18    0.79 
  -2  10   1   29.23    0.79 
  -2  10   1   29.07    0.79 
  -2  10   1   28.85    0.87 
  -2  10   1   30.36    0.93 
  -2  10   1   29.31    0.78 
   2 -11  -1   11.61    0.44 
   2  11   1   11.29    0.46 
   2  11   1   11.17    0.43 
   2  11   1   11.23    0.36 
  -2  11   1   10.59    0.38 
  -2  11   1   10.66    0.36 
  -2  11   1   10.88    0.47 
  -2  11   1   10.34    0.35 
  -2  11   1   10.53    0.36 
  -2  11   1   11.30    0.51 
   2  12   1    8.88    0.41 
   2  12   1    8.28    0.32 
   2 -12  -1    8.51    0.39 
   2  12   1    8.68    0.44 
  -2  12   1    8.56    0.35 
  -2  12   1    8.63    0.48 
  -2  12   1    8.40    0.45 
  -2  12   1    8.02    0.33 
  -2  12   1    8.22    0.31 
  -2  12   1    8.60    0.31 
   2  13   1    7.05    0.41 
   2  13   1    7.35    0.32 
   2  13   1    7.87    0.45 
  -2  13   1    7.19    0.35 
  -2  13   1    7.86    0.49 
  -2  13   1    7.48    0.47 
  -2  13   1    7.73    0.29 
  -2  13   1    7.63    0.33 
  -2  13   1    7.59    0.29 
   2  14   1    9.93    0.53 
   2  14   1    9.79    0.30 
   2  14   1    9.50    0.29 
   2  14   1   10.02    0.39 
   2  14   1    8.52    0.56 
  -2  14   1    9.55    0.44 
  -2  14   1    9.63    0.32 
  -2  14   1    9.91    0.59 
  -2  14   1    9.67    0.40 
  -2  14   1   10.55    0.56 
  -2  14   1    9.82    0.32 
   2  15   1    2.89    0.35 
   2  15   1    2.42    0.18 
   2  15   1    2.09    0.30 
   2  15   1    2.35    0.21 
   2  15   1    2.05    0.32 
  -2  15   1    2.52    0.16 
  -2  15   1    2.67    0.38 
  -2  15   1    3.27    0.38 
  -2  15   1    2.79    0.27 
  -2  15   1    2.48    0.24 
   2  16   1    6.73    0.60 
   2  16   1    6.65    0.38 
   2  16   1    7.67    0.59 
  -2  16   1    7.87    0.68 
  -2  16   1    6.69    0.49 
  -2  16   1    8.06    0.64 
   2  17   1    3.20    0.29 
   2  17   1    3.55    0.44 
   2  17   1    3.78    0.43 
  -2  17   1    3.00    0.46 
  -2  17   1    3.80    0.54 
   3  16  -1    0.95    0.31 
   3  16  -1    1.01    0.33 
   3  16  -1    0.85    0.17 
  -3  16  -1    1.03    0.17 
  -3  16  -1    1.42    0.37 
  -3  16  -1    0.71    0.37 
  -3  16  -1    0.30    0.30 
  -3  16  -1    0.76    0.28 
   3  15  -1    3.61    0.19 
   3  15  -1    3.44    0.35 
   3  15  -1    4.10    0.47 
   3  15  -1    3.07    0.26 
  -3  15  -1    4.05    0.30 
  -3  15  -1    3.69    0.25 
  -3  15  -1    3.99    0.41 
  -3  15  -1    4.12    0.44 
  -3  15  -1    3.60    0.41 
  -3  15  -1    3.09    0.40 
   3  14  -1    2.56    0.50 
   3  14  -1    2.91    0.30 
   3  14  -1    2.96    0.22 
   3  14  -1    2.85    0.14 
  -3  14  -1    2.99    0.21 
  -3  14  -1    2.64    0.28 
  -3  14  -1    3.15    0.36 
  -3  14  -1    2.90    0.35 
  -3  14  -1    2.65    0.36 
  -3  14  -1    2.81    0.27 
   3  13  -1   16.53    0.64 
   3  13  -1   15.20    0.79 
   3  13  -1   15.99    0.49 
  -3  13  -1   15.99    0.50 
  -3  13  -1   15.85    0.67 
  -3  13  -1   16.31    0.60 
  -3  13  -1   16.15    0.57 
  -3  13  -1   16.52    0.55 
  -3  13  -1   16.95    0.72 
   3  12  -1    7.42    0.28 
   3  12  -1    7.30    0.39 
   3  12  -1    7.60    0.40 
  -3  12  -1    7.78    0.38 
  -3  12  -1    7.27    0.36 
  -3  12  -1    7.61    0.30 
  -3  12  -1    7.12    0.34 
  -3  12  -1    6.90    0.48 
  -3  12  -1    7.63    0.44 
   3  11  -1   41.75    1.17 
   3 -11   1   43.25    1.17 
   3  11  -1   41.93    1.06 
   3  11  -1   42.09    1.15 
  -3  11  -1   42.20    1.12 
  -3  11  -1   42.64    1.11 
  -3  11  -1   41.54    1.13 
  -3  11  -1   41.51    1.21 
  -3  11  -1   41.51    1.10 
  -3  11  -1   42.78    1.16 
   3 -10   1   14.41    0.50 
   3  10  -1   13.99    0.47 
   3  10  -1   13.42    0.50 
   3  10  -1   14.04    0.40 
  -3  10  -1   13.47    0.48 
  -3  10  -1   13.53    0.46 
  -3  10  -1   13.65    0.48 
  -3  10  -1   13.63    0.44 
  -3  10  -1   13.32    0.45 
  -3  10  -1   13.97    0.53 
   3   9  -1   41.49    1.09 
   3   9  -1   41.81    1.04 
   3   9  -1   42.57    1.12 
   3  -9   1   43.51    1.13 
  -3   9  -1   41.27    1.12 
  -3   9  -1   41.95    1.16 
  -3   9  -1   40.64    1.09 
  -3   9  -1   42.02    1.08 
  -3   9  -1   41.70    1.12 
  -3   9  -1   41.01    1.09 
   3   8  -1   19.37    0.52 
   3  -8   1   19.77    0.49 
   3   8  -1   20.05    0.57 
   3   8  -1   20.11    0.59 
   3  -8   1   20.35    0.61 
   3  -8   1   19.50    0.49 
  -3   8  -1   19.64    0.57 
  -3   8  -1   20.31    0.61 
  -3   8  -1   19.63    0.58 
  -3   8  -1   19.81    0.57 
  -3   8  -1   20.68    0.60 
  -3   8  -1   19.60    0.63 
   3  -7   1   30.44    0.84 
   3  -7   1   31.83    0.76 
   3  -7   1   31.34    0.76 
   3   7  -1   31.24    0.77 
  -3   7  -1   30.58    0.87 
  -3   7  -1   30.61    0.83 
  -3   7  -1   30.94    0.81 
  -3   7  -1   30.32    0.83 
  -3   7  -1   29.85    0.84 
  -3   7  -1   30.81    0.82 
   3  -6   1   26.81    0.67 
   3   6  -1   27.33    0.64 
   3  -6   1   26.24    0.73 
   3   6  -1   26.40    0.66 
   3  -6   1   26.68    0.66 
  -3   6  -1   26.12    0.71 
  -3   6  -1   26.23    0.70 
  -3   6  -1   25.25    0.73 
  -3   6  -1   25.85    0.70 
  -3  -6   1   26.31    0.62 
  -3   6  -1   25.63    0.71 
  -3   6  -1   25.61    0.74 
   3  -5   1   15.20    0.40 
   3  -5   1   14.64    0.46 
   3  -5   1   14.23    0.45 
   3   5  -1   15.53    0.39 
   3   5  -1   15.40    0.39 
   3  -5   1   14.68    0.41 
  -3   5  -1   14.95    0.44 
  -3   5  -1   14.89    0.44 
  -3   5  -1   14.84    0.46 
  -3   5  -1   14.43    0.43 
  -3   5  -1   14.11    0.43 
  -3  -5   1   14.51    0.37 
   3  -4   1  151.80    3.70 
   3   4  -1  158.23    3.64 
   3  -4   1  153.86    3.66 
   3  -4   1  157.41    3.65 
   3  -4   1  155.08    3.69 
   3   4  -1  158.70    3.68 
  -3   4  -1  151.51    3.69 
  -3   4  -1  161.32    3.67 
  -3   4  -1  150.81    3.69 
  -3   4  -1  158.28    3.67 
  -3   4  -1  156.38    3.68 
  -3  -4   1  155.19    3.62 
   3   3  -1   55.32    1.30 
   3  -3   1   52.35    1.35 
   3   3  -1   56.36    1.30 
   3  -3   1   54.37    1.34 
   3  -3   1   54.12    1.33 
   3  -3   1   52.96    1.32 
   3   3  -1   55.08    1.31 
  -3  -3   1   54.43    1.29 
  -3   3  -1   55.40    1.35 
  -3   3  -1   56.72    1.34 
  -3   3  -1   53.41    1.33 
  -3   3  -1   53.11    1.35 
   3  -2   1  251.98    6.02 
   3  -2   1  260.36    6.08 
   3   2  -1  255.11    6.02 
   3  -2   1  259.68    6.09 
   3   2  -1  260.98    6.02 
   3  -2   1  260.69    6.06 
   3  -2   1  250.00    5.99 
   3   2  -1  260.41    6.10 
   3   2  -1  263.38    5.96 
  -3   2  -1  249.79    5.99 
  -3   2  -1  256.88    6.07 
  -3  -2   1  258.50    6.02 
  -3   2  -1  246.82    5.99 
  -3  -2   1  256.27    6.12 
  -3   2  -1  262.38    6.05 
   3   1  -1  372.78    8.74 
   3  -1   1  379.46    8.86 
   3   1  -1  368.51    8.77 
   3   1  -1  388.64    8.63 
   3  -1   1  367.64    8.77 
   3   1  -1  361.76    8.76 
   3   1  -1  378.32    8.76 
   3  -1   1  359.52    8.61 
   3  -1   1  383.90    8.79 
   3  -1   1  375.03    8.77 
  -3  -1   1  372.08    8.62 
  -3   1  -1  367.36    8.78 
  -3  -1   1  381.56    8.78 
  -3   1  -1  369.93    8.79 
  -3  -1   1  370.89    8.70 
  -3   1  -1  373.46    8.84 
  -3   1  -1  345.71    8.64 
  -3  -1   1  349.01    8.70 
   3   0   1  119.91    2.82 
   3   0  -1  125.08    2.82 
   3   0  -1  122.20    2.84 
   3   0   1  120.23    2.81 
   3   0   1  118.77    2.84 
   3   0   1  122.78    2.82 
   3   0  -1  112.79    2.82 
   3   0  -1  119.60    2.82 
  -3   0   1  118.90    2.82 
  -3   0  -1  117.02    2.82 
  -3   0  -1  120.92    2.82 
  -3   0  -1  121.91    2.81 
  -3   0  -1  115.25    2.83 
  -3   0   1  121.39    2.80 
  -3   0   1  118.56    2.82 
  -3   0   1  120.94    2.84 
  -3   0   1  120.18    2.82 
   3  -1  -1  358.70    8.69 
   3   1   1  379.07    8.69 
   3  -1  -1  376.24    8.82 
   3  -1  -1  349.30    8.61 
   3   1   1  365.43    8.74 
   3  -1  -1  379.13    8.75 
   3   1   1  371.68    8.77 
   3   1   1  362.15    8.66 
  -3   1   1  357.36    8.71 
  -3   1   1  371.48    8.77 
  -3   1   1  362.24    8.67 
  -3  -1  -1  371.90    8.59 
  -3   1   1  378.08    8.75 
  -3  -1  -1  373.71    8.68 
  -3  -1  -1  379.39    8.78 
  -3  -1  -1  349.69    8.65 
  -3   1   1  371.17    8.78 
   3  -2  -1  238.04    5.91 
   3  -2  -1  253.26    5.94 
   3   2   1  255.36    5.93 
   3  -2  -1  259.39    5.99 
   3   2   1  243.92    6.01 
   3  -2  -1  243.88    5.93 
   3   2   1  244.88    5.93 
   3   2   1  265.02    6.01 
  -3   2   1  248.89    5.96 
  -3  -2  -1  259.39    5.93 
  -3  -2  -1  255.33    5.97 
  -3   2   1  255.21    5.97 
  -3   2   1  259.24    6.01 
  -3  -2  -1  259.52    6.07 
  -3   2   1  262.56    6.02 
  -3   2   1  258.33    5.99 
   3  -3  -1   53.69    1.34 
   3  -3  -1   56.02    1.37 
   3  -3  -1   56.82    1.38 
   3  -3  -1   56.03    1.35 
   3   3   1   56.84    1.33 
  -3  -3  -1   55.99    1.32 
  -3  -3  -1   55.04    1.32 
  -3   3   1   52.51    1.35 
  -3  -3  -1   57.42    1.31 
  -3   3   1   55.78    1.37 
  -3   3   1   52.19    1.36 
  -3   3   1   56.24    1.35 
  -3   3   1   54.03    1.37 
   3  -4  -1  151.28    3.61 
   3  -4  -1  152.76    3.62 
   3   4   1  156.07    3.59 
   3  -4  -1  150.44    3.65 
   3   4   1  153.70    3.61 
  -3   4   1  156.84    3.68 
  -3   4   1  153.91    3.66 
  -3  -4  -1  158.22    3.59 
  -3   4   1  155.76    3.63 
  -3   4   1  151.04    3.65 
  -3  -4  -1  152.31    3.59 
  -3  -4  -1  151.16    3.60 
  -3   4   1  156.30    3.66 
  -3   4   1  157.87    3.63 
   3  -5  -1   14.94    0.41 
   3   5   1   14.84    0.41 
   3  -5  -1   14.36    0.45 
   3  -5  -1   14.45    0.40 
   3   5   1   14.68    0.41 
  -3   5   1   15.69    0.47 
  -3   5   1   15.39    0.43 
  -3  -5  -1   15.61    0.41 
  -3   5   1   14.87    0.44 
  -3   5   1   14.80    0.45 
  -3   5   1   14.81    0.48 
  -3  -5  -1   15.63    0.38 
  -3  -5  -1   15.58    0.37 
  -3   5   1   15.10    0.46 
   3  -6  -1   25.83    0.66 
   3  -6  -1   25.84    0.65 
   3  -6  -1   24.82    0.72 
   3   6   1   26.77    0.69 
   3   6   1   25.88    0.67 
  -3   6   1   25.91    0.74 
  -3   6   1   26.86    0.69 
  -3   6   1   26.47    0.72 
  -3   6   1   26.43    0.70 
  -3   6   1   26.75    0.77 
  -3   6   1   26.42    0.72 
   3  -7  -1   30.84    0.75 
   3  -7  -1   30.58    0.85 
   3  -7  -1   30.35    0.75 
   3   7   1   30.52    0.79 
   3   7   1   30.77    0.80 
   3   7   1   31.05    0.82 
  -3   7   1   31.06    0.84 
  -3   7   1   30.89    0.86 
  -3   7   1   31.58    0.82 
  -3   7   1   30.43    0.83 
  -3   7   1   31.47    0.81 
  -3   7   1   31.21    0.90 
   3   8   1   19.78    0.53 
   3   8   1   19.78    0.55 
   3   8   1   20.43    0.58 
   3  -8  -1   18.24    0.64 
  -3   8   1   19.57    0.55 
  -3   8   1   19.49    0.58 
  -3   8   1   19.18    0.56 
  -3   8   1   19.52    0.58 
  -3   8   1   19.27    0.65 
  -3   8   1   19.56    0.62 
   3   9   1   40.82    1.04 
   3   9   1   41.96    1.10 
   3   9   1   41.99    1.07 
   3  -9  -1   39.90    1.11 
  -3   9   1   41.80    1.07 
  -3   9   1   40.46    1.18 
  -3   9   1   41.07    1.14 
  -3   9   1   41.12    1.08 
  -3   9   1   41.79    1.09 
  -3   9   1   41.61    1.09 
   3 -10  -1   13.89    0.50 
   3  10   1   13.69    0.46 
   3  10   1   13.81    0.42 
   3  10   1   13.51    0.49 
  -3  10   1   14.40    0.54 
  -3  10   1   13.78    0.57 
  -3  10   1   14.07    0.46 
  -3  10   1   13.46    0.45 
  -3  10   1   14.10    0.45 
  -3  10   1   14.15    0.46 
   3  11   1   42.30    1.12 
   3  11   1   41.14    1.06 
   3 -11  -1   40.29    1.14 
   3  11   1   42.14    1.14 
  -3  11   1   41.60    1.09 
  -3  11   1   35.27    1.48 
  -3  11   1   42.62    1.10 
  -3  11   1   41.40    1.19 
  -3  11   1   42.12    1.10 
  -3  11   1   42.16    1.09 
   3  12   1    7.94    0.37 
   3  12   1    7.39    0.40 
   3  12   1    7.05    0.30 
  -3  12   1    7.69    0.44 
  -3  12   1    7.22    0.47 
  -3  12   1    7.20    0.31 
  -3  12   1    6.84    0.32 
  -3  12   1    6.83    0.35 
   3  13   1   16.49    0.62 
   3  13   1   15.95    0.51 
   3  13   1   16.45    0.61 
  -3  13   1   16.26    0.51 
  -3  13   1   15.91    0.55 
  -3  13   1   15.70    0.70 
  -3  13   1   14.99    0.52 
  -3  13   1   16.44    0.67 
  -3  13   1   16.63    0.57 
   3  14   1    2.82    0.24 
   3  14   1    2.43    0.34 
   3  14   1    2.73    0.34 
  -3  14   1    3.40    0.32 
  -3  14   1    3.37    0.37 
  -3  14   1    2.96    0.27 
  -3  14   1    2.81    0.35 
  -3  14   1    2.75    0.23 
   3  15   1    3.53    0.44 
   3  15   1    3.20    0.35 
   3  15   1    3.80    0.44 
  -3  15   1    3.79    0.43 
  -3  15   1    3.36    0.25 
  -3  15   1    3.64    0.41 
  -3  15   1    3.46    0.25 
  -3  15   1    3.40    0.41 
  -3  15   1    4.19    0.38 
   3  16   1    1.09    0.20 
   3  16   1    0.97    0.29 
   3  16   1    0.57    0.32 
  -3  16   1    0.72    0.14 
  -3  16   1    1.11    0.29 
  -3  16   1    0.52    0.32 
  -3  16   1    1.31    0.39 
   4  16  -1    5.04    0.58 
   4  16  -1    4.73    0.56 
   4  16  -1    4.53    0.34 
  -4  16  -1    4.55    0.51 
  -4  16  -1    4.30    0.49 
  -4  16  -1    4.65    0.41 
  -4  16  -1    5.27    0.38 
   4  15  -1    2.78    0.27 
   4  15  -1    2.77    0.33 
   4  15  -1    2.49    0.31 
  -4  15  -1    2.70    0.40 
  -4  15  -1    2.32    0.31 
  -4  15  -1    2.68    0.32 
  -4  15  -1    1.39    0.36 
  -4  15  -1    2.86    0.34 
   4  14  -1    3.08    0.24 
   4  14  -1    3.19    0.38 
   4  14  -1    2.68    0.28 
  -4  14  -1    2.51    0.32 
  -4  14  -1    1.73    0.33 
  -4  14  -1    2.50    0.35 
  -4  14  -1    2.46    0.28 
  -4  14  -1    2.85    0.25 
   4  13  -1    9.47    0.47 
   4  13  -1    7.24    0.67 
   4 -13   1    8.94    0.47 
   4  13  -1    9.20    0.34 
  -4  13  -1    9.48    0.57 
  -4  13  -1    9.40    0.38 
  -4  13  -1    9.45    0.45 
  -4  13  -1    8.86    0.47 
  -4  13  -1    9.31    0.43 
  -4  13  -1   10.04    0.55 
   4  12  -1   13.60    0.42 
   4  12  -1   13.28    0.52 
   4  12  -1   12.96    0.51 
  -4  12  -1   12.39    0.63 
  -4  12  -1   13.43    0.47 
  -4  12  -1   12.81    0.51 
  -4  12  -1   14.09    0.54 
  -4  12  -1   12.97    0.59 
  -4  12  -1   12.69    0.51 
   4  11  -1    3.01    0.25 
   4  11  -1    3.36    0.27 
   4  11  -1    3.25    0.18 
  -4  11  -1    3.05    0.23 
  -4  11  -1    3.45    0.27 
  -4  11  -1    3.01    0.27 
  -4  11  -1    3.08    0.33 
  -4  11  -1    3.11    0.27 
   4 -10   1    0.43    0.13 
   4  10  -1    0.18    0.10 
   4  10  -1    0.37    0.08 
   4  10  -1    0.23    0.11 
  -4  10  -1    0.22    0.10 
  -4  10  -1    0.33    0.12 
  -4  10  -1    0.23    0.15 
  -4  10  -1    0.32    0.11 
  -4  10  -1    0.26    0.10 
   4   9  -1    9.18    0.35 
   4  -9   1    9.43    0.27 
   4  -9   1    9.09    0.26 
   4  -9   1    9.49    0.39 
   4   9  -1    9.04    0.30 
  -4   9  -1    9.13    0.36 
  -4   9  -1    9.29    0.37 
  -4   9  -1    9.53    0.36 
  -4   9  -1    8.74    0.41 
  -4   9  -1    8.78    0.38 
  -4   9  -1    9.09    0.36 
   4  -8   1   28.72    0.74 
   4  -8   1   29.21    0.75 
   4   8  -1   29.43    0.76 
   4  -8   1   29.11    0.84 
   4   8  -1   29.14    0.80 
  -4   8  -1   29.42    0.87 
  -4   8  -1   30.46    0.82 
  -4   8  -1   30.52    0.82 
  -4   8  -1   29.90    0.85 
  -4   8  -1   29.60    0.85 
  -4   8  -1   29.04    0.82 
   4   7  -1   26.07    0.67 
   4   7  -1   26.66    0.70 
   4  -7   1   26.47    0.68 
   4  -7   1   27.21    0.69 
  -4   7  -1   26.17    0.77 
  -4   7  -1   25.97    0.73 
  -4   7  -1   26.21    0.75 
  -4  -7   1   25.52    0.64 
  -4   7  -1   25.97    0.77 
  -4   7  -1   25.90    0.72 
  -4   7  -1   26.13    0.74 
  -4  -7   1   25.57    0.63 
   4   6  -1   30.32    0.77 
   4  -6   1   30.65    0.78 
   4   6  -1   30.64    0.78 
   4  -6   1   30.70    0.84 
   4  -6   1   31.15    0.79 
  -4   6  -1   30.61    0.86 
  -4   6  -1   30.20    0.83 
  -4   6  -1   29.98    0.86 
  -4  -6   1   30.03    0.74 
  -4   6  -1   31.35    0.82 
  -4   6  -1   30.20    0.82 
  -4  -6   1   30.37    0.76 
  -4  -6   1   30.41    0.76 
  -4   6  -1   30.39    0.84 
   4   5  -1   36.23    0.86 
   4  -5   1   35.80    0.91 
   4  -5   1   35.94    0.90 
   4   5  -1   37.27    0.87 
   4  -5   1   34.59    0.94 
   4   5  -1   35.80    0.88 
   4   5  -1   35.33    0.88 
  -4   5  -1   34.55    0.93 
  -4   5  -1   35.04    0.94 
  -4   5  -1   35.56    0.93 
  -4   5  -1   34.54    0.95 
  -4   5  -1   35.30    0.92 
  -4  -5   1   35.92    0.87 
  -4   5  -1   33.09    0.95 
   4  -4   1   85.21    2.06 
   4   4  -1   80.30    2.00 
   4  -4   1   87.04    2.07 
   4   4  -1   85.26    2.04 
   4  -4   1   89.17    2.10 
   4  -4   1   83.25    2.11 
   4   4  -1   85.74    2.03 
   4   4  -1   85.79    2.05 
  -4   4  -1   87.78    2.10 
  -4   4  -1   86.78    2.12 
  -4   4  -1   85.69    2.08 
  -4   4  -1   86.75    2.10 
  -4   4  -1   83.27    2.08 
  -4  -4   1   87.03    2.02 
   4   3  -1  103.73    2.40 
   4   3  -1   99.01    2.38 
   4   3  -1   99.15    2.37 
   4  -3   1  105.44    2.42 
   4  -3   1   99.95    2.40 
   4  -3   1  101.39    2.42 
   4  -3   1  100.17    2.44 
   4  -3   1   95.28    2.40 
  -4  -3   1  100.10    2.37 
  -4  -3   1  100.85    2.39 
  -4   3  -1   97.70    2.41 
  -4   3  -1  103.35    2.44 
  -4   3  -1   98.25    2.41 
  -4   3  -1  101.46    2.42 
   4  -2   1  123.37    2.98 
   4  -2   1  129.55    2.95 
   4   2  -1  126.57    2.92 
   4   2  -1  123.83    2.95 
   4  -2   1  127.41    2.95 
   4  -2   1  127.88    2.95 
   4  -2   1  125.09    2.96 
   4   2  -1  125.78    2.93 
   4   2  -1  126.54    2.93 
  -4   2  -1  126.74    2.95 
  -4   2  -1  117.83    2.94 
  -4  -2   1  123.55    2.92 
  -4  -2   1  115.29    2.93 
  -4   2  -1  122.54    2.95 
  -4   2  -1  118.07    2.97 
   4  -1   1    2.55    0.15 
   4   1  -1    2.56    0.14 
   4   1  -1    2.70    0.13 
   4   1  -1    2.52    0.13 
   4  -1   1    2.56    0.13 
   4   1  -1    2.69    0.13 
   4  -1   1    2.86    0.14 
   4  -1   1    2.81    0.14 
   4  -1   1    2.81    0.14 
  -4  -1   1    2.80    0.12 
  -4  -1   1    2.86    0.09 
  -4   1  -1    2.74    0.13 
  -4  -1   1    3.01    0.15 
  -4   1  -1    2.68    0.14 
  -4   1  -1    2.84    0.15 
  -4   1  -1    2.91    0.14 
   4   0   1    5.80    0.23 
   4   0   1    6.27    0.22 
   4   0   1    6.10    0.20 
   4   0  -1    5.96    0.21 
   4   0  -1    5.90    0.23 
   4   0   1    5.91    0.21 
   4   0  -1    5.46    0.21 
  -4   0   1    5.60    0.20 
  -4   0   1    5.70    0.20 
  -4   0   1    5.95    0.18 
  -4   0   1    6.13    0.23 
  -4   0   1    5.62    0.20 
  -4   0  -1    6.03    0.21 
  -4   0  -1    6.55    0.20 
  -4   0  -1    6.26    0.23 
   4  -1  -1    2.87    0.14 
   4   1   1    2.68    0.14 
   4   1   1    2.59    0.13 
   4  -1  -1    2.90    0.14 
   4  -1  -1    3.08    0.16 
   4  -1  -1    2.96    0.14 
   4   1   1    2.97    0.13 
   4   1   1    2.80    0.12 
   4  -1  -1    3.03    0.14 
  -4   1   1    2.51    0.15 
  -4   1   1    2.67    0.13 
  -4   1   1    2.65    0.13 
  -4  -1  -1    2.71    0.12 
  -4  -1  -1    2.64    0.13 
  -4  -1  -1    2.77    0.15 
  -4  -1  -1    2.84    0.09 
  -4  -1  -1    2.45    0.12 
  -4   1   1    2.71    0.12 
   4  -2  -1  120.44    2.95 
   4   2   1  127.21    2.92 
   4  -2  -1  128.27    2.96 
   4  -2  -1  122.53    2.98 
   4   2   1  125.71    2.92 
   4   2   1  122.81    2.94 
   4  -2  -1  118.75    2.94 
  -4   2   1  126.08    2.95 
  -4   2   1  129.06    2.95 
  -4  -2  -1  119.18    2.95 
  -4   2   1  128.49    2.96 
  -4   2   1  119.34    2.97 
  -4   2   1  120.68    2.95 
  -4  -2  -1  127.47    2.89 
  -4  -2  -1  122.30    2.93 
  -4  -2  -1  127.62    2.95 
   4   3   1  100.52    2.30 
   4  -3  -1   99.11    2.39 
   4  -3  -1   96.33    2.41 
   4   3   1   98.05    2.34 
   4   3   1   99.69    2.36 
   4  -3  -1   99.95    2.37 
   4  -3  -1   96.33    2.36 
  -4   3   1  103.64    2.41 
  -4  -3  -1  101.42    2.31 
  -4   3   1   92.90    2.38 
  -4   3   1   98.48    2.40 
  -4   3   1   98.26    2.38 
  -4  -3  -1  100.78    2.35 
  -4  -3  -1   98.13    2.36 
  -4   3   1  101.38    2.40 
  -4  -3  -1   99.49    2.36 
  -4   3   1   99.15    2.39 
   4   4   1   87.66    1.98 
   4   4   1   88.74    2.03 
   4  -4  -1   86.59    2.05 
   4  -4  -1   84.51    2.08 
   4  -4  -1   86.17    2.04 
  -4   4   1   84.42    2.05 
  -4   4   1   83.36    2.08 
  -4   4   1   83.98    2.09 
  -4   4   1   84.27    2.08 
  -4  -4  -1   87.67    2.02 
  -4   4   1   80.68    2.05 
  -4   4   1   80.91    2.07 
  -4   4   1   83.21    2.07 
  -4  -4  -1   84.57    2.02 
   4  -5  -1   34.71    0.94 
   4  -5  -1   34.23    0.89 
   4   5   1   35.94    0.86 
   4  -5  -1   35.40    0.90 
   4   5   1   35.21    0.89 
  -4  -5  -1   35.98    0.86 
  -4  -5  -1   35.37    0.88 
  -4   5   1   34.78    0.96 
  -4   5   1   34.28    0.92 
  -4   5   1   34.30    0.94 
  -4   5   1   34.61    0.95 
  -4  -5  -1   35.41    0.87 
  -4   5   1   35.35    0.94 
  -4   5   1   35.12    0.95 
  -4   5   1   37.09    0.92 
   4  -6  -1   30.27    0.84 
   4   6   1   30.62    0.76 
   4   6   1   30.26    0.78 
   4  -6  -1   30.18    0.77 
   4  -6  -1   30.73    0.78 
  -4   6   1   29.23    0.87 
  -4   6   1   29.14    0.85 
  -4  -6  -1   31.06    0.73 
  -4   6   1   30.08    0.84 
  -4  -6  -1   30.93    0.77 
  -4   6   1   29.67    0.81 
  -4   6   1   30.20    0.81 
  -4  -6  -1   30.51    0.74 
  -4   6   1   30.87    0.84 
   4  -7  -1   26.21    0.76 
   4   7   1   24.89    0.68 
   4  -7  -1   25.01    0.66 
   4   7   1   25.60    0.68 
   4  -7  -1   25.25    0.67 
  -4   7   1   25.73    0.72 
  -4   7   1   26.32    0.71 
  -4   7   1   25.87    0.74 
  -4   7   1   26.39    0.76 
  -4   7   1   26.23    0.74 
  -4   7   1   25.17    0.78 
   4  -8  -1   30.19    0.74 
   4   8   1   29.68    0.79 
   4   8   1   29.98    0.78 
   4  -8  -1   29.98    0.75 
   4   8   1   29.01    0.78 
   4  -8  -1   30.76    0.86 
  -4   8   1   30.34    0.82 
  -4   8   1   29.36    0.87 
  -4   8   1   28.97    0.84 
  -4   8   1   29.56    0.90 
  -4   8   1   29.57    0.84 
  -4   8   1   29.69    0.82 
   4  -9  -1    9.28    0.26 
   4  -9  -1    8.93    0.25 
   4   9   1    9.45    0.33 
   4  -9  -1    9.42    0.39 
   4   9   1    9.20    0.34 
   4   9   1    9.38    0.32 
  -4   9   1    9.57    0.45 
  -4   9   1    9.27    0.41 
  -4   9   1    9.32    0.37 
  -4   9   1    9.50    0.35 
  -4   9   1    9.34    0.38 
  -4   9   1    9.32    0.37 
   4  10   1    0.23    0.10 
   4  10   1    0.23    0.08 
   4  10   1    0.44    0.11 
   4 -10  -1    0.09    0.12 
  -4  10   1    0.33    0.12 
  -4  10   1    0.15    0.11 
  -4  10   1    0.16    0.15 
  -4  10   1    0.38    0.10 
  -4  10   1    0.16    0.14 
   4  11   1    3.06    0.26 
   4 -11  -1    2.77    0.28 
   4  11   1    3.19    0.25 
   4  11   1    3.05    0.20 
  -4  11   1    3.09    0.35 
  -4  11   1    3.34    0.43 
  -4  11   1    2.97    0.26 
  -4  11   1    2.86    0.26 
  -4  11   1    3.03    0.24 
  -4  11   1    3.13    0.24 
   4  12   1   12.63    0.44 
   4  12   1   13.42    0.51 
   4  12   1   13.87    0.50 
  -4  12   1   13.33    0.49 
  -4  12   1   13.00    0.48 
  -4  12   1   13.30    0.62 
  -4  12   1   13.57    0.59 
  -4  12   1   13.69    0.51 
  -4  12   1   13.09    0.49 
   4  13   1    9.24    0.44 
   4 -13  -1    9.46    0.48 
   4  13   1    9.28    0.37 
   4  13   1    8.89    0.45 
  -4  13   1    9.35    0.45 
  -4  13   1    8.63    0.55 
  -4  13   1    9.91    0.43 
  -4  13   1    9.28    0.41 
  -4  13   1    9.10    0.39 
  -4  13   1    9.13    0.53 
   4  14   1    2.42    0.29 
   4  14   1    2.49    0.27 
   4  14   1    2.49    0.25 
  -4  14   1    2.73    0.31 
  -4  14   1    2.76    0.27 
  -4  14   1    2.97    0.26 
  -4  14   1    2.14    0.31 
  -4  14   1    2.36    0.31 
  -4  14   1    2.50    0.27 
  -4  14   1    3.08    0.39 
   4  15   1    2.28    0.27 
   4  15   1    2.68    0.31 
   4  15   1    2.27    0.32 
  -4  15   1    2.50    0.40 
  -4  15   1    2.89    0.38 
  -4  15   1    2.54    0.30 
  -4  15   1    3.32    0.33 
  -4  15   1    2.34    0.29 
   4  16   1    5.27    0.56 
   4  16   1    4.82    0.51 
   4  16   1    5.30    0.37 
  -4  16   1    4.49    0.50 
  -4  16   1    4.56    0.34 
  -4  16   1    4.29    0.47 
   5  16  -1    9.77    0.65 
   5  16  -1    8.76    0.60 
  -5  16  -1   10.16    0.53 
  -5  16  -1    9.36    0.78 
  -5  16  -1    9.78    0.81 
  -5  16  -1    9.18    0.68 
   5  15  -1    1.89    0.31 
   5  15  -1    1.43    0.19 
   5  15  -1    1.75    0.35 
  -5  15  -1    1.41    0.39 
  -5  15  -1    1.49    0.25 
  -5  15  -1    1.62    0.32 
  -5  15  -1    0.93    0.37 
   5  14  -1    5.11    0.44 
   5  14  -1    5.63    0.41 
   5  14  -1    5.97    0.31 
  -5  14  -1    5.46    0.35 
  -5  14  -1    4.82    0.56 
  -5  14  -1    5.55    0.42 
  -5  14  -1    5.49    0.45 
  -5  14  -1    4.89    0.53 
  -5  14  -1    4.91    0.46 
   5  13  -1   23.24    0.58 
   5  13  -1   24.17    0.75 
   5  13  -1   20.50    0.88 
   5  13  -1   22.89    0.66 
  -5  13  -1   22.44    0.87 
  -5  13  -1   22.42    0.78 
  -5  13  -1   21.99    0.76 
  -5  13  -1   22.64    0.80 
  -5  13  -1   22.02    0.90 
  -5  13  -1   23.73    0.73 
   5  12  -1   18.21    0.54 
   5  12  -1   19.18    0.61 
   5  12  -1   18.18    0.47 
   5 -12   1   18.48    0.67 
   5  12  -1   18.31    0.62 
  -5  12  -1   18.44    0.73 
  -5  12  -1   17.06    0.76 
  -5  12  -1   17.40    0.61 
  -5  12  -1   17.62    0.64 
  -5  12  -1   17.94    0.66 
  -5  12  -1   17.40    0.65 
   5  11  -1    2.60    0.14 
   5  11  -1    2.98    0.25 
   5  11  -1    3.07    0.25 
   5  11  -1    2.97    0.19 
  -5  11  -1    2.70    0.28 
  -5  11  -1    2.77    0.29 
  -5  11  -1    3.46    0.35 
  -5  11  -1    2.37    0.30 
  -5  11  -1    2.64    0.28 
  -5  11  -1    2.41    0.25 
   5 -10   1    5.37    0.19 
   5  10  -1    5.52    0.27 
   5 -10   1    4.69    0.32 
   5  10  -1    5.54    0.24 
   5  10  -1    5.45    0.19 
   5  10  -1    5.61    0.29 
   5 -10   1    5.45    0.20 
  -5  10  -1    5.54    0.32 
  -5  10  -1    5.95    0.32 
  -5  10  -1    5.94    0.35 
  -5  10  -1    5.53    0.31 
   5   9  -1   16.65    0.49 
   5   9  -1   16.47    0.45 
   5  -9   1   16.95    0.58 
   5  -9   1   17.03    0.47 
   5  -9   1   16.69    0.47 
   5   9  -1   16.55    0.51 
  -5   9  -1   17.47    0.57 
  -5   9  -1   17.79    0.62 
  -5   9  -1   16.73    0.56 
  -5   9  -1   17.07    0.60 
  -5   9  -1   17.53    0.58 
   5   8  -1   13.92    0.39 
   5  -8   1   14.35    0.43 
   5  -8   1   14.64    0.51 
   5  -8   1   14.94    0.43 
   5   8  -1   14.85    0.43 
   5   8  -1   14.29    0.43 
  -5  -8   1   14.33    0.38 
  -5   8  -1   14.38    0.53 
  -5   8  -1   14.38    0.50 
  -5   8  -1   14.86    0.50 
  -5   8  -1   14.40    0.49 
  -5  -8   1   14.57    0.36 
  -5   8  -1   14.30    0.53 
   5   7  -1   79.70    1.89 
   5  -7   1   80.70    1.92 
   5   7  -1   79.91    1.91 
   5  -7   1   80.43    1.93 
   5  -7   1   77.58    2.00 
   5   7  -1   78.62    1.88 
  -5  -7   1   80.57    1.89 
  -5   7  -1   77.36    1.98 
  -5  -7   1   79.83    1.87 
  -5   7  -1   75.30    2.00 
  -5   7  -1   78.96    1.99 
  -5   7  -1   78.51    2.02 
  -5  -7   1   80.12    1.89 
  -5   7  -1   80.01    2.02 
   5  -6   1   67.29    2.03 
   5  -6   1   80.50    1.90 
   5  -6   1   76.26    1.90 
   5   6  -1   78.80    1.87 
   5   6  -1   78.62    1.85 
   5   6  -1   79.50    1.84 
  -5   6  -1   77.33    1.96 
  -5  -6   1   78.16    1.85 
  -5  -6   1   80.01    1.87 
  -5   6  -1   79.03    1.94 
  -5   6  -1   79.47    1.96 
  -5   6  -1   77.52    1.97 
  -5  -6   1   77.19    1.85 
  -5   6  -1   75.82    1.93 
   5  -5   1    3.55    0.19 
   5   5  -1    3.56    0.11 
   5   5  -1    3.53    0.16 
   5   5  -1    3.57    0.11 
   5   5  -1    3.07    0.15 
   5  -5   1    3.33    0.18 
   5  -5   1    3.31    0.21 
  -5   5  -1    3.62    0.24 
  -5   5  -1    3.65    0.22 
  -5   5  -1    3.96    0.22 
  -5  -5   1    3.98    0.15 
  -5   5  -1    3.73    0.21 
  -5   5  -1    4.01    0.20 
  -5  -5   1    3.96    0.17 
   5   4  -1    2.69    0.14 
   5  -4   1    2.54    0.17 
   5   4  -1    2.72    0.15 
   5   4  -1    2.83    0.14 
   5  -4   1    2.78    0.16 
   5  -4   1    2.82    0.17 
  -5  -4   1    2.66    0.12 
  -5   4  -1    2.60    0.20 
  -5   4  -1    2.61    0.19 
  -5  -4   1    2.64    0.15 
  -5   4  -1    2.91    0.17 
  -5   4  -1    2.64    0.18 
  -5   4  -1    2.86    0.18 
  -5  -4   1    2.36    0.13 
   5   3  -1   92.79    2.15 
   5   3  -1   90.67    2.14 
   5   3  -1   89.19    2.17 
   5   3  -1   91.18    2.15 
   5  -3   1   91.09    2.17 
   5  -3   1   86.42    2.18 
   5  -3   1   86.43    2.17 
   5  -3   1   91.45    2.19 
  -5   3  -1   90.08    2.18 
  -5   3  -1   90.22    2.18 
  -5   3  -1   89.44    2.20 
  -5   3  -1   89.56    2.18 
  -5   3  -1   83.57    2.21 
  -5  -3   1   90.34    2.13 
  -5  -3   1   87.81    2.15 
   5   2  -1   27.05    0.74 
   5   2  -1   26.85    0.72 
   5  -2   1   27.03    0.73 
   5   2  -1   27.37    0.72 
   5  -2   1   26.96    0.74 
   5   2  -1   27.37    0.72 
   5  -2   1   28.58    0.75 
   5  -2   1   28.44    0.74 
  -5   2  -1   27.36    0.74 
  -5   2  -1   26.80    0.74 
  -5  -2   1   27.82    0.71 
  -5   2  -1   26.91    0.77 
  -5   2  -1   27.29    0.76 
  -5   2  -1   28.06    0.75 
  -5  -2   1   27.12    0.74 
   5  -1   1   30.93    0.82 
   5  -1   1   31.36    0.83 
   5   1  -1   33.43    0.82 
   5   1  -1   30.97    0.84 
   5   1  -1   33.11    0.82 
   5  -1   1   32.37    0.83 
   5   1  -1   32.24    0.82 
   5  -1   1   32.29    0.82 
  -5   1  -1   30.55    0.82 
  -5  -1   1   28.08    0.76 
  -5  -1   1   31.67    0.84 
  -5   1  -1   29.97    0.82 
  -5   1  -1   30.51    0.85 
  -5   1  -1   31.10    0.86 
  -5  -1   1   32.22    0.81 
  -5   1  -1   32.01    0.82 
   5   0  -1   49.14    1.22 
   5   0   1   50.20    1.23 
   5   0   1   47.70    1.22 
   5   0   1   49.49    1.21 
   5   0  -1   47.56    1.22 
   5   0   1   49.31    1.22 
   5   0  -1   46.26    1.21 
   5   0  -1   50.05    1.26 
  -5   0   1   48.31    1.24 
  -5   0  -1   45.77    1.21 
  -5   0   1   49.03    1.22 
  -5   0  -1   49.49    1.25 
  -5   0  -1   50.29    1.21 
  -5   0   1   48.62    1.21 
  -5   0   1   49.09    1.18 
  -5   0  -1   48.40    1.25 
   5  -1  -1   32.55    0.85 
   5  -1  -1   30.70    0.84 
   5   1   1   32.42    0.84 
   5  -1  -1   31.97    0.87 
   5  -1  -1   32.04    0.84 
   5  -1  -1   31.72    0.84 
   5   1   1   31.85    0.82 
   5   1   1   31.76    0.83 
  -5   1   1   31.44    0.84 
  -5  -1  -1   31.18    0.83 
  -5  -1  -1   32.13    0.85 
  -5   1   1   32.75    0.84 
  -5   1   1   31.25    0.84 
  -5  -1  -1   32.54    0.81 
  -5   1   1   33.24    0.87 
  -5   1   1   32.22    0.87 
  -5  -1  -1   32.69    0.86 
  -5   1   1   32.36    0.82 
   5  -2  -1   26.81    0.74 
   5   2   1   27.51    0.72 
   5   2   1   27.14    0.74 
   5  -2  -1   26.93    0.74 
   5   2   1   28.79    0.71 
   5  -2  -1   26.74    0.75 
  -5  -2  -1   27.44    0.75 
  -5   2   1   27.71    0.74 
  -5   2   1   28.48    0.78 
  -5   2   1   27.15    0.75 
  -5  -2  -1   28.38    0.72 
  -5  -2  -1   28.47    0.75 
  -5   2   1   27.54    0.74 
  -5  -2  -1   27.93    0.65 
  -5   2   1   28.34    0.78 
  -5   2   1   27.21    0.75 
   5  -3  -1   89.71    2.18 
   5   3   1   92.27    2.14 
   5  -3  -1   85.10    2.19 
   5   3   1   88.70    2.16 
   5  -3  -1   90.20    2.17 
  -5   3   1   89.01    2.18 
  -5  -3  -1   90.52    2.17 
  -5   3   1   88.07    2.19 
  -5   3   1   85.53    2.18 
  -5   3   1   86.44    2.21 
  -5   3   1   90.95    2.19 
  -5   3   1   92.37    2.22 
  -5  -3  -1   92.33    2.17 
  -5  -3  -1   93.10    2.15 
   5   4   1    2.80    0.13 
   5  -4  -1    2.74    0.16 
   5  -4  -1    2.61    0.18 
   5  -4  -1    2.44    0.15 
   5   4   1    2.53    0.14 
  -5   4   1    2.66    0.19 
  -5   4   1    2.62    0.17 
  -5  -4  -1    2.76    0.14 
  -5   4   1    2.47    0.19 
  -5   4   1    2.57    0.18 
  -5   4   1    2.47    0.18 
  -5  -4  -1    2.86    0.13 
  -5   4   1    2.60    0.16 
  -5  -4  -1    2.45    0.14 
   5   5   1    3.83    0.12 
   5  -5  -1    3.77    0.18 
   5   5   1    3.68    0.18 
   5  -5  -1    3.51    0.21 
   5  -5  -1    3.58    0.19 
  -5   5   1    3.34    0.22 
  -5   5   1    3.76    0.23 
  -5   5   1    3.52    0.20 
  -5   5   1    3.46    0.22 
  -5  -5  -1    3.66    0.16 
  -5  -5  -1    3.80    0.16 
  -5   5   1    3.62    0.22 
  -5   5   1    3.65    0.21 
  -5   5   1    3.62    0.19 
   5  -6  -1   76.42    1.90 
   5  -6  -1   75.07    1.89 
   5   6   1   78.75    1.84 
   5  -6  -1   71.38    2.01 
   5   6   1   76.64    1.89 
  -5   6   1   78.24    1.97 
  -5  -6  -1   78.48    1.88 
  -5   6   1   78.31    1.94 
  -5  -6  -1   79.31    1.86 
  -5   6   1   79.06    1.96 
  -5   6   1   80.05    1.97 
  -5  -6  -1   80.36    1.86 
  -5   6   1   76.14    1.96 
  -5   6   1   78.95    1.99 
  -5   6   1   81.51    1.94 
   5   7   1   79.51    1.89 
   5   7   1   77.96    1.93 
   5  -7  -1   79.53    1.93 
   5  -7  -1   81.85    2.01 
   5  -7  -1   78.34    1.92 
  -5  -7  -1   79.71    1.91 
  -5   7   1   76.82    2.00 
  -5   7   1   79.79    2.02 
  -5   7   1   78.07    1.97 
  -5  -7  -1   80.24    1.87 
  -5   7   1   77.80    2.00 
  -5   7   1   77.93    2.04 
  -5   7   1   79.61    1.98 
  -5  -7  -1   80.33    1.87 
  -5   7   1   79.97    2.00 
   5  -8  -1   14.30    0.51 
   5   8   1   14.00    0.41 
   5   8   1   14.07    0.44 
   5  -8  -1   14.41    0.42 
   5  -8  -1   13.81    0.41 
  -5   8   1   13.08    0.50 
  -5   8   1   14.30    0.51 
  -5   8   1   15.04    0.51 
  -5   8   1   14.54    0.49 
  -5   8   1   14.70    0.51 
  -5   8   1   14.19    0.55 
  -5   8   1   14.03    0.52 
   5   9   1   17.47    0.51 
   5  -9  -1   17.34    0.47 
   5   9   1   17.74    0.51 
   5  -9  -1   17.59    0.60 
   5   9   1   17.47    0.52 
   5  -9  -1   17.31    0.48 
  -5   9   1   17.16    0.59 
  -5   9   1   18.13    0.60 
  -5   9   1   16.89    0.57 
  -5   9   1   17.55    0.63 
  -5   9   1   16.85    0.59 
  -5   9   1   16.86    0.65 
  -5   9   1   16.85    0.56 
   5 -10  -1    5.13    0.18 
   5 -10  -1    5.45    0.34 
   5  10   1    5.22    0.26 
   5  10   1    5.23    0.25 
   5 -10  -1    5.29    0.19 
   5  10   1    5.43    0.26 
  -5  10   1    5.52    0.30 
  -5  10   1    5.78    0.38 
  -5  10   1    5.59    0.52 
  -5  10   1    5.37    0.32 
  -5  10   1    5.93    0.33 
  -5  10   1    5.99    0.32 
  -5  10   1    5.48    0.32 
   5  11   1    2.94    0.23 
   5  11   1    2.84    0.24 
   5  11   1    2.62    0.21 
  -5  11   1    3.65    0.27 
  -5  11   1    2.92    0.28 
  -5  11   1    2.77    0.34 
  -5  11   1    3.20    0.29 
  -5  11   1    2.77    0.29 
  -5  11   1    1.90    0.26 
  -5  11   1    2.58    0.26 
   5 -12  -1   18.93    0.69 
   5  12   1   18.85    0.61 
   5  12   1   18.25    0.62 
   5  12   1   17.95    0.58 
  -5  12   1   18.09    0.64 
  -5  12   1   18.68    0.65 
  -5  12   1   19.13    0.65 
  -5  12   1   20.53    0.70 
  -5  12   1   18.38    0.77 
  -5  12   1   18.97    0.73 
  -5  12   1   18.46    0.66 
   5  13   1   22.02    0.72 
   5  13   1   21.89    0.68 
   5  13   1   23.76    0.75 
   5 -13  -1   22.32    0.79 
  -5  13   1   22.05    0.81 
  -5  13   1   22.92    0.86 
  -5  13   1   22.47    0.74 
  -5  13   1   23.31    0.75 
  -5  13   1   22.82    0.80 
  -5  13   1   24.00    0.77 
  -5  13   1   22.13    0.90 
   5  14   1    6.05    0.42 
   5  14   1    5.73    0.40 
   5  14   1    5.67    0.34 
  -5  14   1    5.19    0.52 
  -5  14   1    5.62    0.37 
  -5  14   1    5.58    0.39 
  -5  14   1    5.19    0.59 
  -5  14   1    5.74    0.47 
  -5  14   1    5.55    0.54 
  -5  14   1    6.20    0.46 
   5  15   1    1.55    0.29 
  -5  15   1    1.49    0.35 
  -5  15   1    1.53    0.23 
  -5  15   1    1.26    0.34 
   5  16   1    9.94    0.60 
   5  16   1    9.66    0.65 
   5  16   1    9.93    0.50 
  -5  16   1    8.53    0.76 
  -5  16   1   10.16    0.90 
  -5  16   1    9.61    0.49 
   6  15  -1   21.82    0.84 
   6  15  -1   21.90    0.70 
   6  15  -1   22.29    0.77 
  -6  15  -1   21.68    0.89 
  -6  15  -1   21.61    1.01 
  -6  15  -1   22.81    0.84 
  -6  15  -1   21.47    1.00 
   6  14  -1    4.76    0.43 
   6  14  -1    3.87    0.21 
   6  14  -1    4.05    0.37 
   6  14  -1    3.69    0.31 
  -6  14  -1    3.99    0.46 
  -6  14  -1    4.14    0.44 
  -6  14  -1    3.31    0.42 
  -6  14  -1    3.61    0.38 
   6  13  -1    2.99    0.19 
   6  13  -1    3.10    0.34 
   6  13  -1    2.86    0.30 
   6  13  -1    2.70    0.26 
  -6  13  -1    3.04    0.33 
  -6  13  -1    2.66    0.29 
  -6  13  -1    2.80    0.36 
  -6  13  -1    2.40    0.38 
  -6  13  -1    3.91    0.41 
  -6  13  -1    2.89    0.32 
   6 -12   1    7.23    0.44 
   6  12  -1    6.26    0.36 
   6  12  -1    6.97    0.33 
   6  12  -1    6.42    0.31 
   6  12  -1    6.50    0.25 
  -6  12  -1    6.35    0.44 
  -6  12  -1    7.15    0.42 
  -6  12  -1    6.40    0.49 
  -6  12  -1    6.15    0.51 
  -6  12  -1    5.73    0.42 
  -6  12  -1    6.36    0.38 
   6  11  -1    6.94    0.30 
   6  11  -1    6.62    0.25 
   6  11  -1    6.39    0.34 
   6  11  -1    7.06    0.31 
   6 -11   1    6.92    0.23 
   6 -11   1    6.72    0.24 
  -6  11  -1    7.06    0.49 
  -6  11  -1    7.47    0.39 
  -6  11  -1    6.56    0.46 
  -6  11  -1    6.62    0.42 
  -6  11  -1    7.14    0.40 
   6 -10   1   21.05    0.58 
   6  10  -1   21.09    0.61 
   6  10  -1   21.11    0.60 
   6 -10   1   21.25    0.59 
   6  10  -1   20.75    0.57 
  -6  10  -1   21.50    0.71 
  -6  10  -1   21.56    0.71 
  -6  10  -1   21.44    0.74 
  -6  10  -1   20.41    0.75 
  -6  10  -1   21.41    0.70 
   6  -9   1   26.74    0.74 
   6   9  -1   26.92    0.71 
   6   9  -1   28.21    0.72 
   6   9  -1   26.15    0.74 
   6  -9   1   27.49    0.74 
  -6  -9   1   27.91    0.67 
  -6  -9   1   27.69    0.66 
  -6   9  -1   25.99    0.86 
  -6   9  -1   27.35    0.89 
  -6   9  -1   27.84    0.83 
  -6   9  -1   26.95    0.83 
  -6   9  -1   28.03    0.84 
   6   8  -1   21.27    0.55 
   6   8  -1   20.38    0.59 
   6  -8   1   20.76    0.61 
   6  -8   1   20.32    0.60 
   6   8  -1   20.80    0.56 
  -6   8  -1   20.52    0.70 
  -6  -8   1   21.32    0.56 
  -6   8  -1   20.78    0.71 
  -6  -8   1   21.65    0.53 
  -6   8  -1   21.51    0.68 
  -6   8  -1   20.79    0.67 
  -6   8  -1   20.49    0.67 
   6  -7   1    7.73    0.36 
   6   7  -1    7.96    0.29 
   6   7  -1    7.84    0.27 
   6  -7   1    7.81    0.30 
   6   7  -1    7.73    0.22 
   6  -7   1    7.56    0.31 
   6   7  -1    7.77    0.22 
  -6   7  -1    7.85    0.35 
  -6   7  -1    7.62    0.38 
  -6   7  -1    7.64    0.36 
  -6  -7   1    7.88    0.25 
  -6   7  -1    7.95    0.35 
  -6   7  -1    8.03    0.38 
  -6  -7   1    8.32    0.28 
  -6  -7   1    8.12    0.26 
   6  -6   1   17.14    0.52 
   6  -6   1   17.11    0.52 
   6   6  -1   17.12    0.48 
   6  -6   1   17.24    0.57 
   6   6  -1   17.07    0.50 
  -6   6  -1   17.13    0.57 
  -6  -6   1   17.08    0.47 
  -6   6  -1   16.91    0.55 
  -6  -6   1   17.22    0.50 
  -6   6  -1   15.89    0.59 
  -6   6  -1   16.49    0.57 
  -6   6  -1   17.28    0.56 
   6  -5   1    7.64    0.31 
   6  -5   1    8.16    0.31 
   6   5  -1    7.98    0.29 
   6   5  -1    7.97    0.28 
  -6  -5   1    8.45    0.28 
  -6   5  -1    8.48    0.38 
  -6  -5   1    8.47    0.27 
  -6   5  -1    8.08    0.34 
  -6   5  -1    7.89    0.35 
  -6   5  -1    8.40    0.35 
  -6  -5   1    8.89    0.31 
   6  -4   1    9.57    0.35 
   6   4  -1    9.51    0.32 
   6   4  -1    9.44    0.31 
   6  -4   1    9.72    0.36 
   6  -4   1    9.94    0.35 
   6   4  -1    9.65    0.32 
  -6  -4   1    9.50    0.33 
  -6  -4   1    9.77    0.34 
  -6   4  -1    9.25    0.39 
  -6   4  -1    9.22    0.36 
  -6   4  -1    9.80    0.37 
  -6  -4   1    9.20    0.30 
  -6   4  -1    9.39    0.38 
   6  -3   1    6.75    0.27 
   6  -3   1    6.40    0.27 
   6   3  -1    6.55    0.24 
   6  -3   1    6.50    0.28 
   6   3  -1    6.50    0.25 
   6   3  -1    6.25    0.25 
   6  -3   1    6.39    0.27 
  -6   3  -1    5.96    0.27 
  -6   3  -1    6.29    0.29 
  -6   3  -1    6.03    0.27 
  -6   3  -1    5.73    0.27 
  -6  -3   1    6.30    0.26 
  -6   3  -1    6.28    0.31 
  -6  -3   1    6.61    0.23 
  -6  -3   1    6.14    0.26 
   6  -2   1    9.97    0.35 
   6   2  -1    9.76    0.33 
   6  -2   1    9.92    0.35 
   6   2  -1    9.84    0.33 
   6  -2   1    9.99    0.35 
   6  -2   1    9.48    0.36 
   6   2  -1   10.11    0.34 
  -6  -2   1   10.21    0.33 
  -6   2  -1   10.44    0.38 
  -6  -2   1   10.10    0.36 
  -6   2  -1   10.38    0.36 
  -6  -2   1   10.26    0.36 
  -6   2  -1    9.80    0.35 
  -6   2  -1   10.17    0.36 
  -6   2  -1   10.50    0.40 
   6  -1   1   13.60    0.43 
   6  -1   1   14.24    0.43 
   6   1  -1   13.94    0.43 
   6   1  -1   13.76    0.42 
   6  -1   1   13.82    0.44 
   6  -1   1   13.94    0.44 
   6   1  -1   13.86    0.42 
  -6  -1   1   13.14    0.41 
  -6   1  -1   12.78    0.46 
  -6   1  -1   13.88    0.42 
  -6   1  -1   13.59    0.43 
  -6  -1   1   13.46    0.45 
  -6  -1   1   13.38    0.45 
  -6   1  -1   13.66    0.46 
  -6  -1   1   13.60    0.35 
   6   0  -1    9.26    0.33 
   6   0   1    9.76    0.33 
   6   0   1    9.81    0.34 
   6   0   1    9.55    0.34 
   6   0  -1    8.78    0.33 
   6   0  -1    9.44    0.33 
   6   0  -1    9.22    0.33 
   6   0   1    9.52    0.32 
  -6   0   1    9.37    0.32 
  -6   0  -1    9.59    0.37 
  -6   0  -1    9.59    0.35 
  -6   0   1    9.49    0.28 
  -6   0   1    9.25    0.36 
  -6   0  -1    9.80    0.33 
  -6   0  -1    9.53    0.32 
  -6   0   1    9.74    0.36 
  -6   0   1    9.17    0.32 
   6  -1  -1   12.49    0.43 
   6   1   1   13.56    0.41 
   6   1   1   13.41    0.43 
   6   1   1   13.66    0.42 
   6  -1  -1   13.30    0.43 
   6  -1  -1   13.15    0.43 
   6  -1  -1   13.81    0.44 
   6   1   1   13.73    0.42 
  -6  -1  -1   12.67    0.45 
  -6  -1  -1   14.20    0.45 
  -6   1   1   13.04    0.42 
  -6   1   1   14.24    0.47 
  -6   1   1   14.32    0.47 
  -6   1   1   13.67    0.40 
  -6   1   1   14.02    0.43 
  -6  -1  -1   13.52    0.40 
  -6   1   1   13.78    0.43 
  -6  -1  -1   14.08    0.42 
   6   2   1    9.94    0.32 
   6  -2  -1   10.01    0.35 
   6  -2  -1   10.42    0.36 
   6   2   1   10.58    0.33 
   6  -2  -1   10.77    0.36 
   6   2   1   10.35    0.35 
  -6   2   1    9.52    0.37 
  -6  -2  -1    9.65    0.25 
  -6  -2  -1    9.72    0.35 
  -6   2   1    9.89    0.35 
  -6  -2  -1    9.93    0.33 
  -6   2   1    9.85    0.34 
  -6   2   1    9.17    0.37 
  -6  -2  -1    9.71    0.36 
  -6   2   1    9.49    0.35 
  -6   2   1    9.61    0.33 
   6   3   1    6.48    0.24 
   6  -3  -1    5.88    0.26 
   6   3   1    6.17    0.26 
   6  -3  -1    6.19    0.28 
   6  -3  -1    6.40    0.26 
   6   3   1    6.43    0.23 
  -6   3   1    6.51    0.27 
  -6   3   1    6.36    0.30 
  -6   3   1    6.31    0.27 
  -6   3   1    6.35    0.30 
  -6  -3  -1    6.49    0.23 
  -6   3   1    6.05    0.27 
  -6  -3  -1    6.37    0.26 
  -6   3   1    6.09    0.27 
  -6  -3  -1    6.03    0.27 
   6  -4  -1    9.25    0.34 
   6  -4  -1    9.37    0.36 
   6   4   1    9.43    0.31 
   6  -4  -1    9.68    0.35 
   6   4   1    9.46    0.33 
  -6   4   1    9.43    0.39 
  -6   4   1    9.88    0.35 
  -6   4   1    9.80    0.39 
  -6  -4  -1    9.68    0.31 
  -6   4   1   10.08    0.36 
  -6   4   1    9.59    0.37 
  -6  -4  -1    9.57    0.34 
  -6   4   1    9.56    0.37 
  -6  -4  -1    9.64    0.33 
   6   5   1    8.46    0.27 
   6   5   1    8.52    0.30 
   6  -5  -1    8.47    0.31 
   6  -5  -1    8.48    0.32 
   6  -5  -1    8.11    0.35 
  -6   5   1    7.92    0.36 
  -6  -5  -1    7.74    0.28 
  -6   5   1    7.81    0.34 
  -6   5   1    7.58    0.35 
  -6  -5  -1    7.97    0.27 
  -6   5   1    7.43    0.35 
  -6  -5  -1    7.33    0.28 
  -6   5   1    7.78    0.35 
  -6   5   1    7.38    0.33 
   6  -6  -1   17.71    0.58 
   6  -6  -1   16.78    0.53 
   6  -6  -1   17.02    0.52 
   6   6   1   16.17    0.51 
  -6   6   1   17.55    0.59 
  -6  -6  -1   17.12    0.49 
  -6   6   1   17.11    0.59 
  -6   6   1   18.59    0.56 
  -6  -6  -1   17.80    0.49 
  -6   6   1   17.62    0.57 
  -6   6   1   17.06    0.59 
  -6   6   1   17.43    0.58 
   6  -7  -1    8.32    0.37 
   6   7   1    8.21    0.31 
   6  -7  -1    8.34    0.31 
   6  -7  -1    8.22    0.32 
   6   7   1    7.85    0.23 
  -6  -7  -1    8.16    0.26 
  -6   7   1    7.85    0.38 
  -6  -7  -1    7.84    0.26 
  -6  -7  -1    8.11    0.28 
  -6   7   1    8.57    0.35 
  -6   7   1    7.40    0.37 
  -6   7   1    8.24    0.36 
  -6   7   1    7.94    0.35 
  -6   7   1    7.65    0.37 
  -6   7   1    7.89    0.40 
   6  -8  -1   20.71    0.60 
   6   8   1   21.06    0.61 
   6  -8  -1   22.13    0.70 
   6  -8  -1   21.30    0.59 
   6   8   1   20.56    0.54 
  -6  -8  -1   21.65    0.59 
  -6  -8  -1   21.17    0.53 
  -6   8   1   21.09    0.66 
  -6   8   1   20.14    0.73 
  -6   8   1   20.43    0.69 
  -6  -8  -1   20.96    0.53 
  -6   8   1   20.77    0.70 
  -6   8   1   20.46    0.66 
  -6   8   1   20.20    0.69 
  -6   8   1   20.87    0.68 
   6  -9  -1   27.89    0.74 
   6   9   1   27.78    0.72 
   6   9   1   27.35    0.77 
   6  -9  -1   28.43    0.86 
   6  -9  -1   27.47    0.74 
  -6   9   1   28.42    0.86 
  -6   9   1   26.58    0.87 
  -6   9   1   28.46    0.83 
  -6   9   1   26.92    0.85 
  -6   9   1   27.58    0.83 
  -6   9   1   27.54    0.86 
  -6   9   1   26.65    0.90 
   6 -10  -1   21.64    0.58 
   6 -10  -1   21.37    0.58 
   6  10   1   21.95    0.63 
   6  10   1   21.34    0.59 
   6  10   1   21.27    0.63 
  -6  10   1   21.55    0.69 
  -6  10   1   21.75    0.76 
  -6  10   1   20.36    0.69 
  -6  10   1   20.84    0.71 
  -6  10   1   20.45    0.72 
  -6  10   1   19.90    0.77 
  -6  10   1   21.27    0.72 
   6 -11  -1    6.93    0.23 
   6  11   1    7.11    0.33 
   6 -11  -1    7.37    0.43 
   6 -11  -1    7.00    0.24 
   6  11   1    6.69    0.32 
   6  11   1    7.23    0.30 
  -6  11   1    7.14    0.39 
  -6  11   1    5.77    0.51 
  -6  11   1    7.13    0.47 
  -6  11   1    6.76    0.42 
  -6  11   1    6.52    0.40 
  -6  11   1    6.89    0.40 
  -6  11   1    6.85    0.46 
   6 -12  -1    6.89    0.45 
   6  12   1    7.10    0.34 
   6  12   1    6.96    0.33 
   6  12   1    6.77    0.37 
  -6  12   1    7.07    0.43 
  -6  12   1    6.85    0.49 
  -6  12   1    6.65    0.41 
  -6  12   1    6.76    0.41 
  -6  12   1    6.60    0.50 
  -6  12   1    7.39    0.46 
  -6  12   1    6.73    0.44 
   6  13   1    2.91    0.29 
   6  13   1    2.95    0.28 
   6  13   1    2.83    0.34 
  -6  13   1    2.87    0.33 
  -6  13   1    3.00    0.30 
  -6  13   1    3.12    0.32 
  -6  13   1    2.85    0.29 
  -6  13   1    3.43    0.41 
  -6  13   1    3.08    0.40 
  -6  13   1    2.53    0.34 
   6  14   1    3.79    0.38 
   6  14   1    4.19    0.34 
   6  14   1    3.61    0.36 
  -6  14   1    3.99    0.40 
  -6  14   1    4.60    0.55 
  -6  14   1    4.18    0.47 
   6  15   1   21.68    0.82 
   6  15   1   21.82    0.76 
   6  15   1   22.43    0.75 
  -6  15   1   22.05    0.78 
  -6  15   1   20.92    0.97 
  -6  15   1   22.85    1.02 
   7  15  -1    6.10    0.56 
  -7  15  -1    5.78    0.58 
  -7  15  -1    5.65    0.65 
  -7  15  -1    5.56    0.59 
  -7  15  -1    3.85    0.60 
   7  14  -1    4.08    0.35 
   7  14  -1    3.72    0.46 
   7  14  -1    4.31    0.34 
  -7  14  -1    4.41    0.51 
  -7  14  -1    4.11    0.42 
  -7  14  -1    3.69    0.45 
  -7  14  -1    4.57    0.52 
   7  13  -1    5.22    0.40 
   7  13  -1    4.89    0.32 
   7  13  -1    5.00    0.31 
   7  13  -1    4.59    0.27 
  -7  13  -1    5.05    0.54 
  -7  13  -1    4.74    0.46 
  -7  13  -1    4.38    0.47 
  -7  13  -1    4.82    0.49 
  -7  13  -1    3.98    0.42 
   7 -12   1    2.51    0.18 
   7  12  -1    2.56    0.22 
   7 -12   1    2.01    0.16 
   7  12  -1    2.64    0.30 
   7  12  -1    2.73    0.25 
   7  12  -1    2.70    0.21 
  -7  12  -1    2.38    0.33 
  -7  12  -1    2.43    0.29 
  -7  12  -1    2.35    0.27 
  -7  12  -1    2.70    0.31 
  -7  12  -1    2.64    0.30 
  -7  12  -1    2.09    0.32 
   7 -11   1    6.34    0.29 
   7 -11   1    7.20    0.51 
   7 -11   1    6.49    0.28 
   7  11  -1    6.97    0.27 
   7  11  -1    6.94    0.29 
   7  11  -1    6.95    0.32 
  -7  11  -1    6.26    0.50 
  -7  11  -1    6.44    0.43 
  -7  11  -1    7.69    0.44 
  -7  11  -1    6.98    0.44 
  -7  11  -1    7.42    0.50 
  -7  11  -1    6.83    0.46 
   7  10  -1    6.69    0.30 
   7  10  -1    6.48    0.23 
   7 -10   1    6.62    0.30 
   7  10  -1    6.92    0.28 
  -7  10  -1    6.42    0.40 
  -7  10  -1    6.46    0.41 
  -7  10  -1    6.89    0.45 
  -7  10  -1    5.87    0.39 
  -7  10  -1    5.59    0.41 
  -7  10  -1    6.34    0.46 
   7   9  -1    8.71    0.25 
   7  -9   1    8.44    0.35 
   7   9  -1    8.76    0.34 
   7   9  -1    8.51    0.32 
   7   9  -1    8.62    0.25 
   7  -9   1    9.12    0.34 
  -7   9  -1    8.16    0.46 
  -7   9  -1    8.41    0.42 
  -7   9  -1    8.07    0.45 
  -7   9  -1    8.42    0.46 
  -7  -9   1    8.53    0.25 
  -7  -9   1    8.65    0.28 
  -7   9  -1    8.73    0.43 
   7  -8   1   46.06    1.19 
   7   8  -1   44.93    1.15 
   7  -8   1   46.05    1.20 
   7   8  -1   46.37    1.18 
  -7   8  -1   45.61    1.27 
  -7   8  -1   45.00    1.31 
  -7   8  -1   42.96    1.31 
  -7  -8   1   46.26    1.14 
  -7  -8   1   45.77    1.15 
  -7   8  -1   45.63    1.26 
  -7  -8   1   44.99    1.12 
  -7   8  -1   45.09    1.28 
   7   7  -1    8.71    0.32 
   7  -7   1    8.75    0.35 
   7  -7   1    8.23    0.36 
   7  -7   1    8.31    0.40 
   7   7  -1    8.38    0.33 
  -7   7  -1    8.70    0.41 
  -7  -7   1    8.80    0.32 
  -7   7  -1    8.57    0.42 
  -7   7  -1    8.22    0.39 
  -7   7  -1    9.07    0.39 
  -7  -7   1    8.95    0.29 
  -7   7  -1    8.34    0.43 
   7  -6   1    9.70    0.41 
   7   6  -1    9.43    0.35 
   7   6  -1    8.88    0.34 
   7  -6   1    8.94    0.37 
   7  -6   1   10.13    0.37 
   7   6  -1    9.37    0.33 
  -7  -6   1    9.66    0.35 
  -7   6  -1    9.69    0.42 
  -7   6  -1    9.74    0.42 
  -7  -6   1    9.33    0.31 
  -7   6  -1    9.07    0.43 
  -7  -6   1    9.00    0.32 
  -7   6  -1   10.00    0.40 
  -7   6  -1    9.80    0.40 
   7   5  -1   11.22    0.39 
   7  -5   1   11.54    0.44 
   7   5  -1   11.45    0.39 
   7   5  -1   11.63    0.39 
   7  -5   1   11.59    0.41 
   7  -5   1   10.73    0.42 
  -7   5  -1   11.58    0.43 
  -7   5  -1   12.09    0.45 
  -7   5  -1   11.59    0.48 
  -7  -5   1   11.72    0.39 
  -7  -5   1   11.60    0.36 
  -7   5  -1   11.41    0.45 
  -7   5  -1   12.20    0.47 
  -7  -5   1   11.68    0.40 
   7   4  -1   24.92    0.68 
   7   4  -1   23.99    0.67 
   7  -4   1   23.90    0.70 
   7   4  -1   23.84    0.68 
   7  -4   1   23.17    0.70 
   7  -4   1   25.83    0.73 
  -7   4  -1   23.21    0.71 
  -7   4  -1   23.43    0.72 
  -7  -4   1   22.95    0.71 
  -7   4  -1   23.85    0.72 
  -7  -4   1   23.97    0.65 
  -7   4  -1   24.34    0.77 
  -7  -4   1   23.88    0.69 
  -7   4  -1   24.48    0.75 
   7   3  -1   26.73    0.76 
   7  -3   1   27.28    0.79 
   7  -3   1   27.53    0.78 
   7  -3   1   24.59    0.82 
   7  -3   1   27.38    0.80 
   7   3  -1   27.50    0.76 
   7   3  -1   26.81    0.76 
  -7   3  -1   29.06    0.83 
  -7  -3   1   27.56    0.78 
  -7   3  -1   28.49    0.80 
  -7   3  -1   27.89    0.79 
  -7   3  -1   28.44    0.85 
  -7   3  -1   26.83    0.79 
  -7  -3   1   27.83    0.74 
   7   2  -1    8.35    0.31 
   7   2  -1    8.41    0.32 
   7  -2   1    7.64    0.33 
   7  -2   1    8.30    0.33 
   7  -2   1    8.18    0.34 
   7   2  -1    8.36    0.31 
   7  -2   1    7.69    0.33 
  -7  -2   1    8.15    0.34 
  -7   2  -1    7.82    0.35 
  -7   2  -1    8.22    0.37 
  -7  -2   1    8.15    0.29 
  -7  -2   1    7.88    0.33 
  -7   2  -1    8.39    0.33 
  -7   2  -1    8.24    0.33 
   7  -1   1    4.46    0.24 
   7  -1   1    4.79    0.24 
   7   1  -1    4.60    0.23 
   7   1  -1    5.01    0.23 
   7   1  -1    4.90    0.23 
   7  -1   1    4.83    0.24 
   7  -1   1    4.65    0.23 
   7   1  -1    4.62    0.23 
  -7   1  -1    4.64    0.23 
  -7   1  -1    4.48    0.27 
  -7  -1   1    4.53    0.25 
  -7  -1   1    4.65    0.16 
  -7  -1   1    4.72    0.22 
  -7  -1   1    4.53    0.25 
  -7   1  -1    4.68    0.23 
  -7   1  -1    4.74    0.25 
   7   0  -1   10.73    0.38 
   7   0   1   11.42    0.38 
   7   0  -1   10.93    0.39 
   7   0   1   11.48    0.40 
   7   0   1   11.14    0.39 
   7   0  -1   11.54    0.39 
   7   0   1   11.22    0.39 
   7   0  -1   11.41    0.39 
  -7   0   1   11.05    0.42 
  -7   0  -1   11.16    0.41 
  -7   0  -1   11.41    0.43 
  -7   0  -1   10.89    0.37 
  -7   0  -1   10.84    0.38 
  -7   0   1   10.97    0.38 
  -7   0   1   10.55    0.41 
  -7   0   1   11.32    0.33 
  -7   0   1   10.92    0.38 
   7   1   1    4.36    0.23 
   7  -1  -1    4.92    0.24 
   7   1   1    4.34    0.23 
   7  -1  -1    5.02    0.24 
   7  -1  -1    4.64    0.24 
   7   1   1    4.45    0.22 
   7  -1  -1    4.41    0.23 
   7   1   1    4.95    0.22 
  -7   1   1    4.61    0.27 
  -7   1   1    4.50    0.23 
  -7  -1  -1    4.59    0.26 
  -7   1   1    4.67    0.23 
  -7  -1  -1    4.90    0.21 
  -7  -1  -1    4.81    0.25 
  -7   1   1    4.66    0.26 
  -7  -1  -1    4.40    0.22 
  -7   1   1    4.86    0.21 
   7  -2  -1    7.62    0.33 
   7   2   1    8.25    0.30 
   7   2   1    7.77    0.31 
   7  -2  -1    8.00    0.33 
   7   2   1    7.88    0.32 
   7  -2  -1    7.58    0.32 
   7   2   1    8.45    0.31 
  -7  -2  -1    8.05    0.34 
  -7   2   1    8.50    0.36 
  -7   2   1    8.40    0.36 
  -7   2   1    8.37    0.31 
  -7   2   1    8.33    0.33 
  -7  -2  -1    8.54    0.30 
  -7   2   1    8.21    0.32 
  -7  -2  -1    8.19    0.33 
  -7  -2  -1    8.17    0.21 
  -7  -2  -1    6.76    0.23 
   7   3   1   28.25    0.75 
   7   3   1   27.03    0.75 
   7  -3  -1   23.52    0.92 
   7  -3  -1   28.20    0.77 
   7  -3  -1   24.94    0.82 
   7   3   1   28.16    0.77 
   7   3   1   28.27    0.74 
  -7   3   1   27.87    0.82 
  -7  -3  -1   25.56    0.77 
  -7   3   1   27.32    0.78 
  -7   3   1   24.69    0.83 
  -7   3   1   27.50    0.77 
  -7  -3  -1   26.68    0.74 
  -7   3   1   28.45    0.83 
  -7   3   1   27.84    0.79 
   7  -4  -1   23.97    0.73 
   7  -4  -1   24.47    0.71 
   7  -4  -1   23.66    0.70 
   7   4   1   24.17    0.67 
   7   4   1   23.77    0.69 
   7   4   1   23.71    0.66 
  -7   4   1   24.55    0.73 
  -7   4   1   25.15    0.72 
  -7  -4  -1   25.08    0.67 
  -7  -4  -1   23.43    0.69 
  -7   4   1   24.41    0.76 
  -7   4   1   24.36    0.72 
  -7   4   1   23.14    0.72 
  -7  -4  -1   21.12    0.73 
  -7   4   1   25.13    0.76 
   7  -5  -1   11.74    0.45 
   7  -5  -1   11.26    0.41 
   7   5   1   11.73    0.38 
   7  -5  -1   11.58    0.41 
   7   5   1   11.51    0.40 
   7   5   1   11.92    0.37 
  -7   5   1   11.46    0.42 
  -7   5   1   11.74    0.44 
  -7   5   1   11.56    0.47 
  -7  -5  -1   10.41    0.40 
  -7   5   1   11.70    0.47 
  -7   5   1   11.59    0.45 
  -7  -5  -1   11.22    0.39 
  -7   5   1   11.14    0.45 
  -7  -5  -1   11.39    0.37 
   7   6   1    9.19    0.32 
   7  -6  -1    9.25    0.37 
   7  -6  -1    9.10    0.40 
   7   6   1    9.50    0.36 
   7  -6  -1    9.61    0.36 
  -7   6   1    9.43    0.41 
  -7   6   1    8.71    0.42 
  -7   6   1    9.23    0.42 
  -7  -6  -1    9.39    0.32 
  -7   6   1    9.06    0.37 
  -7   6   1    9.13    0.42 
  -7  -6  -1    9.10    0.32 
  -7   6   1    9.32    0.38 
   7   7   1    8.51    0.31 
   7  -7  -1    8.40    0.34 
   7   7   1    8.32    0.34 
   7  -7  -1    8.28    0.35 
  -7   7   1    8.46    0.39 
  -7   7   1    8.47    0.43 
  -7  -7  -1    8.75    0.30 
  -7   7   1    8.56    0.42 
  -7   7   1    8.28    0.37 
  -7   7   1    7.94    0.41 
  -7   7   1    8.40    0.41 
  -7  -7  -1    8.61    0.30 
  -7  -7  -1    8.86    0.30 
   7   8   1   44.55    1.17 
   7  -8  -1   45.91    1.16 
   7  -8  -1   45.03    1.17 
  -7   8   1   45.57    1.30 
  -7   8   1   42.84    1.24 
  -7   8   1   46.06    1.23 
  -7   8   1   46.63    1.28 
  -7  -8  -1   39.50    1.17 
  -7   8   1   42.21    1.27 
  -7  -8  -1   45.07    1.10 
  -7   8   1   44.25    1.29 
  -7  -8  -1   45.76    1.10 
   7  -9  -1    8.57    0.34 
   7   9   1    8.60    0.35 
   7  -9  -1    8.59    0.34 
   7   9   1    8.59    0.26 
  -7   9   1    8.59    0.44 
  -7   9   1    8.09    0.45 
  -7   9   1    8.21    0.42 
  -7   9   1    8.33    0.48 
  -7  -9  -1    8.60    0.25 
  -7   9   1    8.12    0.44 
  -7   9   1    9.10    0.41 
   7  10   1    6.29    0.23 
   7 -10  -1    6.37    0.28 
   7  10   1    6.29    0.32 
   7 -10  -1    6.28    0.29 
  -7  10   1    7.08    0.41 
  -7  10   1    6.44    0.44 
  -7  10   1    6.75    0.39 
  -7  10   1    6.70    0.41 
  -7  10   1    6.52    0.40 
  -7  10   1    6.43    0.45 
   7  11   1    7.20    0.36 
   7 -11  -1    6.55    0.28 
   7  11   1    7.20    0.34 
   7  11   1    7.27    0.28 
   7 -11  -1    7.39    0.47 
   7 -11  -1    7.43    0.29 
  -7  11   1    6.64    0.44 
  -7  11   1    7.10    0.44 
  -7  11   1    6.94    0.50 
  -7  11   1    7.64    0.43 
  -7  11   1    6.41    0.49 
  -7  11   1    6.93    0.45 
   7  12   1    2.65    0.22 
   7  12   1    2.26    0.22 
   7  12   1    2.44    0.29 
   7 -12  -1    2.49    0.17 
   7  12   1    1.99    0.20 
  -7  12   1    3.06    0.37 
  -7  12   1    2.48    0.35 
  -7  12   1    2.57    0.29 
  -7  12   1    2.65    0.31 
  -7  12   1    2.87    0.37 
  -7  12   1    2.49    0.31 
   7  13   1    4.76    0.30 
   7  13   1    5.28    0.39 
   7  13   1    4.44    0.26 
   7  13   1    5.10    0.36 
  -7  13   1    4.80    0.55 
  -7  13   1    5.65    0.47 
  -7  13   1    4.83    0.54 
  -7  13   1    5.21    0.45 
   7  14   1    3.31    0.47 
   7  14   1    3.42    0.54 
   7  14   1    4.07    0.34 
  -7  14   1    4.09    0.47 
  -7  14   1    3.87    0.45 
  -7  14   1    3.77    0.43 
   7  15   1    5.78    0.52 
   7  15   1    5.40    0.45 
  -7  15   1    6.21    0.52 
  -7  15   1    6.25    0.73 
  -7  15   1    4.92    0.64 
   8  14  -1    4.13    0.43 
   8  14  -1    3.86    0.37 
  -8  14  -1    3.78    0.50 
  -8  14  -1    4.46    0.45 
  -8  14  -1    3.68    0.41 
  -8  14  -1    3.34    0.47 
   8  13  -1    3.25    0.30 
   8  13  -1    3.41    0.35 
   8  13  -1    3.54    0.40 
  -8  13  -1    3.50    0.40 
  -8  13  -1    3.83    0.45 
  -8  13  -1    3.94    0.50 
  -8  13  -1    3.33    0.39 
   8 -12   1    6.98    0.32 
   8  12  -1    6.91    0.41 
   8  12  -1    6.73    0.38 
   8  12  -1    6.63    0.33 
   8 -12   1    6.94    0.32 
   8  12  -1    6.95    0.23 
  -8  12  -1    5.89    0.71 
  -8  12  -1    6.72    0.52 
  -8  12  -1    6.75    0.57 
  -8  12  -1    6.93    0.54 
  -8  12  -1    6.45    0.59 
   8  11  -1   10.21    0.43 
   8 -11   1   10.36    0.39 
   8  11  -1   10.43    0.40 
   8 -11   1   10.69    0.41 
  -8  11  -1   10.77    0.62 
  -8  11  -1    9.72    0.57 
  -8  11  -1   10.86    0.60 
  -8  11  -1    8.26    0.84 
  -8  11  -1   10.65    0.57 
  -8  11  -1   10.40    0.55 
   8  10  -1   14.84    0.48 
   8  10  -1   13.68    0.50 
   8 -10   1   15.22    0.50 
   8 -10   1   14.54    0.50 
  -8  10  -1   15.84    0.63 
  -8 -10   1   14.84    0.41 
  -8  10  -1   14.57    0.65 
  -8 -10   1   14.25    0.38 
  -8  10  -1   13.83    0.68 
  -8  10  -1   13.56    0.63 
  -8  10  -1   14.96    0.62 
  -8  10  -1   12.47    0.69 
   8   9  -1    4.70    0.27 
   8  -9   1    4.12    0.28 
   8  -9   1    4.44    0.30 
   8   9  -1    4.43    0.27 
  -8   9  -1    5.22    0.38 
  -8  -9   1    5.29    0.23 
  -8  -9   1    5.01    0.23 
  -8   9  -1    4.79    0.41 
  -8   9  -1    4.24    0.39 
  -8   9  -1    5.12    0.40 
  -8  -9   1    4.60    0.19 
  -8   9  -1    5.17    0.39 
  -8   9  -1    4.92    0.38 
   8  -8   1   24.90    0.74 
   8   8  -1   24.54    0.72 
   8  -8   1   24.22    0.74 
   8   8  -1   24.39    0.70 
  -8   8  -1   24.63    0.83 
  -8   8  -1   24.56    0.84 
  -8   8  -1   23.80    0.80 
  -8   8  -1   24.98    0.81 
  -8  -8   1   25.06    0.70 
  -8  -8   1   23.96    0.66 
  -8   8  -1   23.61    0.85 
  -8  -8   1   24.90    0.67 
   8  -7   1   13.27    0.49 
   8   7  -1   13.45    0.45 
   8   7  -1   14.26    0.47 
   8  -7   1   13.79    0.49 
   8  -7   1   13.56    0.54 
   8   7  -1   13.40    0.46 
  -8   7  -1   13.27    0.55 
  -8   7  -1   11.40    0.55 
  -8  -7   1   14.40    0.46 
  -8   7  -1   12.49    0.52 
  -8   7  -1   10.24    0.76 
  -8  -7   1   13.73    0.41 
  -8   7  -1   13.47    0.72 
   8   6  -1   25.53    0.73 
   8   6  -1   22.57    0.78 
   8  -6   1   25.11    0.77 
   8  -6   1   25.53    0.76 
   8  -6   1   26.37    0.81 
   8   6  -1   25.74    0.74 
  -8   6  -1   25.45    0.85 
  -8   6  -1   26.10    0.80 
  -8  -6   1   25.29    0.72 
  -8  -6   1   25.66    0.69 
  -8   6  -1   25.96    0.81 
  -8   6  -1   26.03    0.83 
  -8  -6   1   25.99    0.75 
  -8   6  -1   24.77    0.79 
   8   5  -1   53.54    1.40 
   8  -5   1   54.05    1.43 
   8  -5   1   53.58    1.45 
   8  -5   1   55.86    1.43 
   8   5  -1   55.24    1.40 
   8   5  -1   54.21    1.39 
  -8   5  -1   54.82    1.46 
  -8  -5   1   55.04    1.42 
  -8   5  -1   51.59    1.44 
  -8  -5   1   53.22    1.39 
  -8   5  -1   53.46    1.51 
  -8   5  -1   55.01    1.49 
  -8   5  -1   53.88    1.46 
  -8  -5   1   54.59    1.36 
   8  -4   1   48.40    1.31 
   8   4  -1   48.50    1.28 
   8  -4   1   49.79    1.31 
   8   4  -1   48.18    1.27 
   8   4  -1   48.52    1.27 
   8  -4   1   48.38    1.33 
  -8  -4   1   49.41    1.25 
  -8   4  -1   49.59    1.33 
  -8  -4   1   49.57    1.29 
  -8   4  -1   48.33    1.38 
  -8   4  -1   49.11    1.36 
  -8  -4   1   50.19    1.31 
  -8   4  -1   49.79    1.33 
   8   3  -1   18.72    0.57 
   8   3  -1   18.19    0.57 
   8   3  -1   18.31    0.57 
   8  -3   1   18.81    0.60 
   8  -3   1   17.99    0.61 
   8  -3   1   19.39    0.60 
   8  -3   1   19.10    0.61 
  -8   3  -1   17.46    0.59 
  -8   3  -1   18.25    0.66 
  -8   3  -1   17.88    0.60 
  -8  -3   1   18.36    0.60 
  -8  -3   1   17.87    0.59 
  -8  -3   1   18.09    0.55 
  -8   3  -1   17.80    0.63 
   8  -2   1    6.14    0.31 
   8   2  -1    5.83    0.28 
   8   2  -1    5.96    0.29 
   8  -2   1    5.48    0.29 
   8  -2   1    5.05    0.33 
   8   2  -1    5.45    0.33 
   8  -2   1    6.14    0.31 
   8   2  -1    6.12    0.28 
  -8  -2   1    6.13    0.31 
  -8   2  -1    6.27    0.33 
  -8  -2   1    6.50    0.32 
  -8   2  -1    6.36    0.30 
  -8   2  -1    6.77    0.36 
  -8   2  -1    6.42    0.30 
  -8  -2   1    6.41    0.27 
   8  -1   1   20.46    0.63 
   8   1  -1   20.65    0.62 
   8  -1   1   19.03    0.63 
   8   1  -1   19.92    0.62 
   8   1  -1   20.14    0.62 
   8  -1   1   19.75    0.63 
   8  -1   1   20.03    0.62 
   8   1  -1   19.71    0.62 
  -8  -1   1   20.28    0.65 
  -8   1  -1   21.07    0.67 
  -8   1  -1   19.97    0.68 
  -8  -1   1   20.55    0.52 
  -8  -1   1   21.00    0.66 
  -8   1  -1   20.50    0.61 
  -8  -1   1   20.31    0.61 
  -8   1  -1   20.62    0.63 
   8   0   1    3.04    0.21 
   8   0   1    2.89    0.21 
   8   0   1    3.16    0.22 
   8   0  -1    3.05    0.22 
   8   0  -1    2.95    0.21 
   8   0   1    3.19    0.23 
   8   0  -1    3.35    0.22 
   8   0  -1    3.23    0.23 
  -8   0   1    2.95    0.26 
  -8   0  -1    2.68    0.26 
  -8   0  -1    2.93    0.20 
  -8   0   1    3.20    0.16 
  -8   0  -1    3.14    0.20 
  -8   0   1    3.26    0.21 
  -8   0  -1    3.52    0.24 
  -8   0   1    3.10    0.24 
   8  -1  -1   21.12    0.63 
   8   1   1   20.45    0.62 
   8   1   1   20.19    0.62 
   8   1   1   20.37    0.63 
   8   1   1   20.52    0.61 
   8  -1  -1   20.30    0.63 
   8  -1  -1   19.61    0.63 
   8  -1  -1   19.21    0.62 
  -8  -1  -1   20.18    0.66 
  -8  -1  -1   19.80    0.64 
  -8  -1  -1   19.98    0.51 
  -8  -1  -1   19.91    0.61 
  -8   1   1   20.16    0.57 
  -8   1   1   20.04    0.67 
  -8   1   1   19.81    0.61 
  -8  -1  -1   19.46    0.58 
  -8   1   1   20.66    0.62 
  -8  -1  -1   19.73    0.53 
  -8   1   1   19.26    0.66 
   8   2   1    6.08    0.29 
   8   2   1    6.37    0.27 
   8  -2  -1    5.71    0.29 
   8   2   1    6.06    0.29 
   8  -2  -1    6.38    0.31 
   8  -2  -1    5.96    0.30 
  -8  -2  -1    5.83    0.16 
  -8   2   1    5.87    0.27 
  -8  -2  -1    5.69    0.31 
  -8   2   1    5.83    0.29 
  -8   2   1    5.89    0.33 
  -8  -2  -1    5.69    0.30 
  -8  -2  -1    5.73    0.27 
  -8   2   1    5.77    0.32 
  -8   2   1    5.79    0.29 
   8  -3  -1   17.14    0.59 
   8  -3  -1   18.48    0.61 
   8   3   1   18.28    0.57 
   8   3   1   17.66    0.56 
   8   3   1   17.90    0.58 
   8  -3  -1   17.31    0.58 
   8   3   1   17.95    0.55 
  -8  -3  -1   19.36    0.61 
  -8   3   1   17.93    0.64 
  -8   3   1   19.56    0.59 
  -8  -3  -1   19.31    0.60 
  -8   3   1   19.00    0.64 
  -8  -3  -1   17.43    0.60 
  -8   3   1   19.78    0.61 
  -8   3   1   17.80    0.59 
   8  -4  -1   49.96    1.34 
   8   4   1   50.01    1.28 
   8  -4  -1   47.68    1.30 
   8   4   1   51.02    1.26 
   8  -4  -1   49.78    1.32 
   8   4   1   50.45    1.30 
   8   4   1   50.82    1.28 
  -8  -4  -1   47.19    1.27 
  -8   4   1   46.95    1.36 
  -8   4   1   50.26    1.33 
  -8   4   1   48.73    1.37 
  -8  -4  -1   48.84    1.30 
  -8   4   1   46.19    1.32 
  -8  -4  -1   50.03    1.30 
  -8   4   1   48.78    1.31 
   8  -5  -1   53.14    1.41 
   8  -5  -1   54.04    1.46 
   8   5   1   54.26    1.39 
   8  -5  -1   54.24    1.43 
   8   5   1   51.56    1.40 
   8   5   1   52.33    1.38 
   8   5   1   53.96    1.37 
  -8  -5  -1   53.85    1.40 
  -8   5   1   52.77    1.49 
  -8  -5  -1   55.66    1.40 
  -8   5   1   54.72    1.46 
  -8   5   1   53.74    1.45 
  -8   5   1   54.11    1.45 
  -8   5   1   56.30    1.50 
  -8  -5  -1   54.96    1.37 
  -8   5   1   55.10    1.44 
   8  -6  -1   25.14    0.77 
   8   6   1   25.46    0.73 
   8   6   1   25.99    0.73 
   8   6   1   25.32    0.72 
   8   6   1   25.64    0.76 
   8  -6  -1   25.30    0.76 
  -8   6   1   25.57    0.85 
  -8  -6  -1   26.88    0.74 
  -8   6   1   24.94    0.81 
  -8  -6  -1   25.27    0.71 
  -8   6   1   25.26    0.82 
  -8   6   1   26.77    0.79 
  -8   6   1   24.57    0.83 
   8   7   1   13.39    0.45 
   8  -7  -1   13.57    0.49 
   8   7   1   14.33    0.44 
   8   7   1   13.44    0.45 
   8  -7  -1   13.65    0.48 
   8   7   1   14.40    0.49 
  -8  -7  -1   13.29    0.42 
  -8   7   1   11.66    0.57 
  -8  -7  -1   13.75    0.43 
  -8   7   1   12.69    0.51 
  -8   7   1   12.80    0.56 
  -8   7   1   10.42    0.74 
   8  -8  -1   24.74    0.72 
   8   8   1   24.76    0.73 
   8   8   1   25.08    0.70 
   8   8   1   24.32    0.69 
   8  -8  -1   25.19    0.74 
  -8   8   1   23.76    0.81 
  -8   8   1   23.87    0.79 
  -8  -8  -1   23.97    0.67 
  -8  -8  -1   23.45    0.65 
  -8   8   1   22.70    0.93 
  -8  -8  -1   24.77    0.66 
  -8   8   1   24.46    0.78 
  -8   8   1   19.39    1.02 
  -8   8   1   23.49    0.82 
   8   9   1    4.10    0.42 
   8  -9  -1    4.99    0.29 
   8   9   1    4.57    0.26 
   8  -9  -1    4.88    0.30 
   8   9   1    5.41    0.31 
  -8   9   1    4.81    0.35 
  -8   9   1    4.14    0.35 
  -8   9   1    4.47    0.38 
  -8   9   1    4.89    0.39 
  -8  -9  -1    4.50    0.19 
  -8  -9  -1    5.10    0.25 
  -8  -9  -1    4.84    0.20 
  -8   9   1    4.24    0.39 
   8  10   1   14.80    0.53 
   8 -10  -1   13.54    0.48 
   8 -10  -1   14.15    0.50 
   8 -10  -1   16.36    0.73 
   8  10   1   14.06    0.47 
  -8  10   1   15.05    0.64 
  -8 -10  -1   15.05    0.37 
  -8 -10  -1   14.77    0.37 
  -8  10   1   14.25    0.64 
  -8  10   1   14.76    0.61 
  -8  10   1   11.42    0.88 
  -8  10   1   15.40    0.69 
   8  11   1   10.58    0.45 
   8 -11  -1   10.06    0.39 
   8  11   1   10.13    0.39 
   8  11   1   10.64    0.42 
   8 -11  -1   10.62    0.40 
  -8  11   1   10.27    0.56 
  -8  11   1   10.47    0.57 
  -8  11   1   10.58    0.59 
  -8  11   1   10.25    0.61 
   8  12   1    7.34    0.38 
   8 -12  -1    6.81    0.30 
   8  12   1    7.18    0.25 
   8  12   1    6.53    0.39 
   8  12   1    6.87    0.34 
  -8  12   1    7.11    0.52 
  -8  12   1    6.41    0.50 
  -8  12   1    6.36    0.56 
  -8  12   1    6.85    0.58 
   8  13   1    3.33    0.35 
   8  13   1    3.82    0.29 
   8  13   1    3.41    0.39 
  -8  13   1    2.65    0.40 
  -8  13   1    3.81    0.39 
  -8  13   1    3.17    0.39 
   8  14   1    4.67    0.46 
   8  14   1    3.92    0.41 
  -8  14   1    4.99    0.54 
  -8  14   1    3.06    0.45 
  -8  14   1    3.68    0.40 
   9  13  -1    0.41    0.21 
   9  13  -1    0.60    0.25 
   9  13  -1    1.17    0.23 
  -9  13  -1    0.73    0.32 
  -9  13  -1    0.66    0.38 
  -9  13  -1    0.87    0.35 
   9 -12   1   14.06    0.51 
   9  12  -1   13.76    0.54 
   9 -12   1   13.67    0.51 
   9  12  -1   13.54    0.52 
  -9  12  -1   12.88    0.71 
  -9  12  -1   12.91    0.78 
  -9  12  -1   13.43    0.71 
  -9  12  -1   14.43    0.75 
   9  11  -1    1.19    0.20 
   9 -11   1    1.41    0.20 
   9 -11   1    1.29    0.20 
   9  11  -1    1.32    0.20 
  -9  11  -1    1.46    0.34 
  -9  11  -1    1.13    0.30 
  -9  11  -1    1.03    0.29 
  -9  11  -1    0.84    0.28 
   9  10  -1    6.06    0.34 
   9  10  -1    5.20    0.35 
   9 -10   1    6.17    0.36 
   9 -10   1    5.41    0.36 
   9  10  -1    5.22    0.33 
  -9  10  -1    6.10    0.52 
  -9  10  -1    5.20    0.47 
  -9  10  -1    5.45    0.49 
  -9  10  -1    5.57    0.45 
  -9 -10   1    5.21    0.25 
  -9  10  -1    5.44    0.47 
   9  -9   1    2.72    0.29 
   9  -9   1    2.95    0.30 
   9   9  -1    2.83    0.28 
   9   9  -1    3.26    0.28 
   9   9  -1    3.01    0.27 
   9  -9   1    3.23    0.38 
  -9   9  -1    2.27    0.30 
  -9   9  -1    2.73    0.33 
  -9   9  -1    3.07    0.37 
  -9  -9   1    2.97    0.23 
  -9   9  -1    3.06    0.38 
  -9   9  -1    2.71    0.33 
  -9  -9   1    2.53    0.18 
  -9  -9   1    2.98    0.21 
  -9   9  -1    2.71    0.31 
   9   8  -1    3.87    0.28 
   9   8  -1    3.78    0.28 
   9  -8   1    3.69    0.36 
   9   8  -1    3.83    0.28 
   9  -8   1    3.70    0.31 
   9  -8   1    3.50    0.31 
  -9   8  -1    3.07    0.36 
  -9   8  -1    3.14    0.39 
  -9   8  -1    3.24    0.37 
  -9  -8   1    3.75    0.26 
  -9   8  -1    3.72    0.35 
  -9   8  -1    3.02    0.38 
  -9  -8   1    3.40    0.21 
   9   7  -1    3.46    0.27 
   9  -7   1    2.88    0.30 
   9   7  -1    3.13    0.26 
   9  -7   1    3.52    0.28 
   9  -7   1    3.19    0.32 
   9   7  -1    2.92    0.25 
  -9   7  -1    3.29    0.31 
  -9  -7   1    3.37    0.20 
  -9   7  -1    3.25    0.34 
  -9  -7   1    3.17    0.26 
  -9   7  -1    3.52    0.37 
  -9   7  -1    3.28    0.35 
  -9   7  -1    3.26    0.34 
   9  -6   1    9.45    0.45 
   9   6  -1    8.95    0.38 
   9   6  -1    8.63    0.38 
   9   6  -1    9.16    0.38 
   9  -6   1    9.44    0.42 
   9  -6   1    8.70    0.41 
  -9   6  -1    8.53    0.55 
  -9  -6   1    9.43    0.40 
  -9  -6   1    8.60    0.33 
  -9   6  -1    8.77    0.47 
  -9  -6   1    8.74    0.37 
  -9   6  -1    9.37    0.47 
   9  -5   1   34.00    1.00 
   9  -5   1   33.69    1.00 
   9  -5   1   34.53    1.03 
   9   5  -1   34.45    0.97 
   9   5  -1   34.97    0.97 
   9   5  -1   34.55    0.97 
  -9   5  -1   34.98    1.03 
  -9  -5   1   34.88    0.98 
  -9   5  -1   33.70    1.08 
  -9  -5   1   36.09    0.94 
  -9  -5   1   35.09    1.00 
  -9   5  -1   35.04    1.07 
   9  -4   1   14.81    0.55 
   9   4  -1   14.66    0.51 
   9   4  -1   14.94    0.50 
   9  -4   1   14.51    0.53 
   9   4  -1   14.70    0.50 
   9  -4   1   13.77    0.52 
  -9   4  -1   13.70    0.60 
  -9  -4   1   14.43    0.52 
  -9   4  -1   14.44    0.58 
  -9  -4   1   13.79    0.52 
  -9   4  -1   13.57    0.54 
  -9  -4   1   14.26    0.47 
   9  -3   1    9.18    0.41 
   9   3  -1    9.14    0.38 
   9   3  -1    9.04    0.38 
   9   3  -1    9.47    0.39 
   9   3  -1    9.23    0.38 
   9  -3   1    8.56    0.39 
   9  -3   1    9.16    0.41 
   9  -3   1    8.35    0.39 
  -9   3  -1    9.04    0.40 
  -9   3  -1    9.42    0.45 
  -9  -3   1    9.05    0.41 
  -9   3  -1    9.05    0.40 
  -9   3  -1    8.67    0.47 
  -9  -3   1    9.46    0.41 
  -9  -3   1    8.56    0.35 
   9  -2   1    3.97    0.27 
   9   2  -1    3.76    0.26 
   9   2  -1    4.18    0.26 
   9  -2   1    3.66    0.27 
   9   2  -1    3.89    0.27 
   9   2  -1    3.77    0.26 
   9  -2   1    4.41    0.28 
   9  -2   1    3.64    0.27 
  -9   2  -1    3.99    0.26 
  -9   2  -1    3.54    0.33 
  -9   2  -1    4.14    0.31 
  -9   2  -1    4.15    0.27 
  -9  -2   1    3.95    0.24 
  -9  -2   1    4.01    0.28 
  -9  -2   1    3.79    0.29 
   9   1  -1   24.91    0.74 
   9  -1   1   23.74    0.75 
   9   1  -1   23.90    0.73 
   9   1  -1   22.71    0.72 
   9   1  -1   23.62    0.73 
   9  -1   1   23.25    0.74 
   9  -1   1   23.50    0.73 
   9  -1   1   23.74    0.74 
  -9   1  -1   23.90    0.78 
  -9  -1   1   24.33    0.60 
  -9   1  -1   25.35    0.74 
  -9  -1   1   23.15    0.76 
  -9  -1   1   23.38    0.71 
  -9   1  -1   23.87    0.80 
  -9  -1   1   23.89    0.77 
  -9   1  -1   24.40    0.69 
  -9   1  -1   23.62    0.71 
   9   0   1   55.55    1.46 
   9   0  -1   54.83    1.46 
   9   0   1   56.03    1.47 
   9   0   1   56.79    1.49 
   9   0  -1   57.09    1.48 
   9   0   1   53.43    1.46 
   9   0  -1   56.48    1.47 
   9   0  -1   55.48    1.47 
  -9   0  -1   54.97    1.52 
  -9   0   1   54.15    1.51 
  -9   0   1   55.74    1.52 
  -9   0   1   53.74    1.44 
  -9   0  -1   56.30    1.46 
  -9   0  -1   55.67    1.51 
  -9   0   1   55.17    1.46 
  -9   0  -1   55.79    1.39 
  -9   0  -1   57.11    1.44 
  -9   0   1   56.51    1.37 
   9   1   1   23.28    0.77 
   9  -1  -1   23.65    0.74 
   9   1   1   24.52    0.73 
   9  -1  -1   24.15    0.74 
   9  -1  -1   23.89    0.73 
   9   1   1   24.07    0.74 
   9  -1  -1   24.82    0.75 
   9   1   1   22.88    0.72 
  -9  -1  -1   23.80    0.69 
  -9  -1  -1   23.03    0.60 
  -9   1   1   22.46    0.77 
  -9  -1  -1   22.90    0.75 
  -9  -1  -1   24.19    0.78 
  -9   1   1   22.13    0.71 
  -9   1   1   24.28    0.73 
  -9   1   1   23.59    0.66 
  -9   1   1   23.18    0.78 
  -9  -1  -1   24.02    0.72 
  -9  -1  -1   24.35    0.62 
   9   2   1    3.97    0.25 
   9  -2  -1    4.75    0.29 
   9   2   1    3.90    0.27 
   9  -2  -1    3.80    0.26 
   9   2   1    4.01    0.26 
   9  -2  -1    3.94    0.27 
   9   2   1    3.84    0.26 
  -9   2   1    3.88    0.27 
  -9  -2  -1    3.55    0.30 
  -9  -2  -1    3.77    0.27 
  -9   2   1    4.10    0.33 
  -9   2   1    4.15    0.31 
  -9  -2  -1    3.67    0.24 
  -9   2   1    3.81    0.26 
  -9   2   1    4.02    0.23 
   9   3   1    8.74    0.39 
   9   3   1    8.82    0.38 
   9   3   1    8.27    0.38 
   9   3   1    9.49    0.37 
   9  -3  -1    9.10    0.40 
   9  -3  -1    8.83    0.41 
   9  -3  -1    8.28    0.39 
  -9   3   1    9.66    0.46 
  -9   3   1    9.30    0.40 
  -9   3   1    8.69    0.40 
  -9  -3  -1    8.87    0.39 
  -9  -3  -1    9.32    0.36 
  -9  -3  -1    8.51    0.42 
  -9   3   1    8.80    0.37 
  -9   3   1    9.19    0.46 
   9  -4  -1   14.51    0.52 
   9  -4  -1   13.53    0.52 
   9  -4  -1   14.72    0.55 
   9   4   1   14.50    0.48 
   9   4   1   13.71    0.50 
   9   4   1   13.31    0.49 
   9   4   1   13.98    0.51 
  -9  -4  -1   14.56    0.53 
  -9   4   1   15.03    0.59 
  -9   4   1   13.62    0.52 
  -9   4   1   14.49    0.54 
  -9  -4  -1   14.74    0.52 
  -9  -4  -1   14.48    0.48 
  -9   4   1   13.64    0.58 
  -9   4   1   14.67    0.54 
   9  -5  -1   34.73    1.00 
   9  -5  -1   35.41    1.02 
   9  -5  -1   35.73    1.05 
   9   5   1   34.72    1.00 
   9   5   1   35.58    0.98 
   9   5   1   35.69    0.98 
   9   5   1   35.42    0.96 
  -9   5   1   34.76    1.03 
  -9   5   1   35.00    1.04 
  -9   5   1   34.14    1.08 
  -9   5   1   34.95    1.08 
  -9  -5  -1   34.57    1.00 
  -9  -5  -1   34.78    0.95 
  -9  -5  -1   35.05    0.99 
   9  -6  -1    8.50    0.45 
   9  -6  -1    9.09    0.42 
   9  -6  -1    8.67    0.40 
   9   6   1    9.24    0.40 
   9   6   1    9.28    0.36 
   9   6   1    8.61    0.37 
   9   6   1    8.92    0.38 
  -9   6   1    8.71    0.44 
  -9  -6  -1    9.26    0.38 
  -9   6   1    8.98    0.45 
  -9   6   1    8.01    0.49 
  -9  -6  -1    9.40    0.35 
  -9   6   1    9.09    0.49 
  -9  -6  -1    9.10    0.39 
   9  -7  -1    3.47    0.27 
   9   7   1    3.40    0.26 
   9  -7  -1    2.77    0.30 
   9   7   1    2.88    0.26 
   9   7   1    3.37    0.27 
   9   7   1    3.21    0.26 
  -9   7   1    2.87    0.34 
  -9   7   1    3.66    0.38 
  -9   7   1    3.19    0.32 
  -9  -7  -1    3.59    0.24 
  -9  -7  -1    3.66    0.22 
  -9  -7  -1    3.00    0.23 
  -9   7   1    3.47    0.36 
   9   8   1    3.72    0.30 
   9   8   1    3.68    0.27 
   9   8   1    3.55    0.27 
   9  -8  -1    3.76    0.30 
   9   8   1    3.28    0.25 
   9  -8  -1    3.25    0.31 
  -9   8   1    4.17    0.41 
  -9   8   1    3.83    0.39 
  -9  -8  -1    3.69    0.23 
  -9   8   1    4.44    0.36 
  -9  -8  -1    3.81    0.23 
  -9   8   1    3.55    0.38 
  -9   8   1    3.82    0.37 
   9  -9  -1    2.37    0.41 
   9   9   1    2.40    0.26 
   9  -9  -1    2.91    0.30 
   9   9   1    2.69    0.33 
   9  -9  -1    3.20    0.29 
   9   9   1    2.78    0.30 
   9   9   1    3.20    0.27 
  -9  -9  -1    3.21    0.19 
  -9   9   1    2.13    0.27 
  -9  -9  -1    3.12    0.23 
  -9   9   1    2.53    0.30 
  -9  -9  -1    3.32    0.20 
  -9   9   1    3.27    0.40 
  -9   9   1    2.20    0.27 
  -9   9   1    2.88    0.30 
   9 -10  -1    5.75    0.36 
   9  10   1    5.32    0.33 
   9  10   1    5.64    0.33 
   9  10   1    5.76    0.37 
   9 -10  -1    5.57    0.34 
  -9  10   1    5.06    0.46 
  -9 -10  -1    5.48    0.22 
  -9  10   1    5.37    0.47 
  -9  10   1    6.11    0.49 
  -9  10   1    6.27    0.50 
   9  11   1    1.19    0.19 
   9  11   1    1.38    0.22 
   9 -11  -1    1.32    0.20 
   9  11   1    1.23    0.21 
   9 -11  -1    1.09    0.19 
  -9  11   1    1.28    0.29 
  -9  11   1    0.83    0.30 
  -9  11   1    1.20    0.31 
  -9  11   1    1.30    0.31 
   9 -12  -1   13.56    0.49 
   9  12   1   13.81    0.54 
   9  12   1   14.18    0.52 
   9 -12  -1   12.71    0.58 
   9  12   1   13.38    0.66 
   9  12   1   13.34    0.55 
  -9  12   1   13.86    0.72 
  -9  12   1   14.12    0.72 
  -9  12   1   13.02    0.72 
  -9  12   1   14.64    0.79 
   9  13   1    0.51    0.24 
   9  13   1    0.46    0.24 
  -9  13   1    0.82    0.38 
  -9  13   1    0.51    0.34 
  -9  13   1    0.92    0.32 
  10  12  -1    0.49    0.27 
  10  12  -1    0.47    0.22 
  10 -12   1    0.34    0.26 
  10  12  -1   -0.14    0.21 
 -10  12  -1    0.45    0.36 
 -10  12  -1    0.27    0.30 
 -10  12  -1    0.54    0.34 
  10  11  -1    9.00    0.47 
  10 -11   1    8.24    0.46 
  10  11  -1    7.92    0.50 
  10  11  -1    8.79    0.46 
 -10  11  -1    8.23    0.63 
 -10  11  -1    8.51    0.67 
 -10  11  -1    8.05    0.67 
 -10  11  -1    8.79    0.64 
  10  10  -1    1.99    0.24 
  10  10  -1    2.21    0.26 
  10  10  -1    2.13    0.24 
  10 -10   1    3.14    0.35 
 -10  10  -1    1.91    0.32 
 -10  10  -1    2.00    0.31 
 -10  10  -1    1.95    0.36 
 -10  10  -1    2.52    0.39 
  10   9  -1    2.67    0.31 
  10   9  -1    2.89    0.33 
  10  -9   1    3.17    0.34 
  10   9  -1    3.13    0.32 
 -10  -9   1    3.03    0.23 
 -10   9  -1    3.17    0.39 
 -10   9  -1    2.90    0.32 
 -10   9  -1    2.65    0.32 
 -10   9  -1    2.24    0.33 
  10   8  -1    0.33    0.16 
  10  -8   1    0.02    0.23 
  10   8  -1    0.28    0.17 
  10  -8   1    0.34    0.19 
  10   8  -1    0.18    0.17 
 -10   8  -1    0.11    0.22 
 -10   8  -1    0.55    0.24 
 -10  -8   1    0.37    0.12 
 -10   8  -1    0.10    0.19 
 -10   8  -1   -0.06    0.20 
 -10   8  -1    0.31    0.22 
 -10  -8   1    0.31    0.11 
  10   7  -1    4.05    0.31 
  10   7  -1    4.33    0.32 
  10   7  -1    3.85    0.32 
  10  -7   1    3.69    0.39 
  10  -7   1    3.52    0.35 
 -10   7  -1    4.50    0.40 
 -10  -7   1    4.39    0.26 
 -10  -7   1    4.22    0.30 
 -10   7  -1    3.81    0.37 
 -10   7  -1    3.96    0.43 
 -10   7  -1    3.49    0.43 
 -10   7  -1    5.12    0.42 
  10   6  -1   11.05    0.47 
  10   6  -1   11.38    0.46 
  10   6  -1   10.71    0.46 
  10  -6   1   11.19    0.53 
  10   6  -1   11.14    0.46 
  10  -6   1   10.76    0.50 
 -10   6  -1   11.44    0.54 
 -10  -6   1   11.57    0.41 
 -10   6  -1   11.76    0.53 
 -10   6  -1   10.66    0.58 
 -10  -6   1   11.77    0.46 
 -10   6  -1   11.77    0.57 
  10   5  -1    1.01    0.17 
  10  -5   1    1.01    0.19 
  10   5  -1    1.04    0.18 
  10   5  -1    1.09    0.18 
  10   5  -1    1.27    0.18 
  10  -5   1    1.01    0.20 
 -10   5  -1    1.03    0.20 
 -10  -5   1    1.27    0.15 
 -10   5  -1    1.03    0.20 
 -10   5  -1    0.55    0.24 
 -10  -5   1    1.11    0.19 
 -10   5  -1    0.91    0.22 
  10  -4   1   30.18    0.93 
  10  -4   1   30.89    0.95 
  10   4  -1   30.30    0.91 
  10   4  -1   29.83    0.90 
  10   4  -1   31.67    0.90 
  10   4  -1   30.08    0.90 
 -10  -4   1   31.22    0.93 
 -10  -4   1   30.29    0.86 
 -10   4  -1   30.43    1.02 
 -10   4  -1   31.40    1.00 
 -10   4  -1   28.86    1.01 
 -10   4  -1   30.33    0.93 
  10   3  -1   29.32    0.90 
  10   3  -1   30.55    0.90 
  10  -3   1   29.82    0.92 
  10  -3   1   29.25    0.93 
  10   3  -1   31.01    0.91 
  10   3  -1   29.59    0.90 
  10  -3   1   29.95    0.93 
 -10  -3   1   31.38    0.87 
 -10   3  -1   31.64    0.90 
 -10   3  -1   29.91    1.00 
 -10  -3   1   30.83    0.94 
 -10   3  -1   30.47    0.91 
 -10   3  -1   29.82    0.97 
  10   2  -1   23.57    0.75 
  10  -2   1   23.57    0.77 
  10   2  -1   24.33    0.75 
  10  -2   1   22.24    0.86 
  10   2  -1   24.52    0.76 
  10   2  -1   24.24    0.76 
  10  -2   1   19.97    0.83 
 -10  -2   1   24.57    0.79 
 -10   2  -1   23.93    0.75 
 -10   2  -1   24.50    0.72 
 -10   2  -1   25.08    0.82 
 -10  -2   1   24.16    0.73 
 -10   2  -1   23.92    0.84 
 -10   2  -1   24.18    0.76 
  10  -1   1   15.82    0.60 
  10   1  -1   16.02    0.58 
  10   1  -1   16.28    0.58 
  10   1  -1   15.78    0.57 
  10  -1   1   15.34    0.64 
  10   1  -1   16.77    0.59 
  10  -1   1   16.00    0.58 
  10  -1   1   14.05    0.57 
 -10   1  -1   17.04    0.58 
 -10  -1   1   17.07    0.43 
 -10   1  -1   16.24    0.56 
 -10  -1   1   17.75    0.58 
 -10  -1   1   16.70    0.63 
 -10   1  -1   16.91    0.63 
 -10   1  -1   16.17    0.65 
 -10   1  -1   16.40    0.52 
  10   0   1   16.55    0.59 
  10   0  -1   16.97    0.60 
  10   0  -1   16.05    0.58 
  10   0   1   16.06    0.59 
  10   0   1   16.57    0.58 
  10   0  -1   17.20    0.60 
  10   0   1   15.79    0.60 
  10   0  -1   16.98    0.60 
 -10   0  -1   16.47    0.58 
 -10   0  -1   17.19    0.50 
 -10   0   1   16.25    0.57 
 -10   0   1   16.56    0.63 
 -10   0  -1   17.11    0.56 
 -10   0  -1   15.74    0.64 
 -10   0   1   16.80    0.48 
 -10   0   1   15.92    0.63 
 -10   0   1   16.86    0.57 
  10   1   1   16.86    0.59 
  10  -1  -1   17.28    0.60 
  10  -1  -1   15.52    0.64 
  10   1   1   16.97    0.57 
  10   1   1   15.55    0.58 
  10   1   1   16.62    0.59 
 -10   1   1   15.89    0.57 
 -10  -1  -1   16.48    0.43 
 -10   1   1   15.58    0.63 
 -10   1   1   16.26    0.50 
 -10   1   1   15.29    0.63 
 -10  -1  -1   16.93    0.57 
 -10   1   1   16.09    0.57 
 -10  -1  -1   15.32    0.62 
 -10  -1  -1   16.33    0.45 
  10   2   1   24.56    0.76 
  10   2   1   24.19    0.77 
  10   2   1   25.08    0.77 
  10  -2  -1   25.31    0.80 
  10   2   1   25.19    0.79 
 -10  -2  -1   24.34    0.75 
 -10   2   1   24.38    0.78 
 -10   2   1   25.18    0.72 
 -10   2   1   23.76    0.84 
 -10   2   1   25.18    0.85 
 -10   2   1   24.01    0.77 
 -10  -2  -1   24.72    0.82 
  10   3   1   30.57    0.89 
  10   3   1   30.49    0.89 
  10  -3  -1   29.81    0.90 
  10   3   1   30.93    0.87 
  10  -3  -1   31.09    0.93 
  10   3   1   29.42    0.90 
 -10   3   1   29.12    0.97 
 -10   3   1   29.93    0.87 
 -10  -3  -1   29.16    0.93 
 -10   3   1   27.04    0.90 
 -10   3   1   29.73    0.91 
 -10  -3  -1   30.69    0.87 
 -10   3   1   29.25    0.97 
  10  -4  -1   30.33    0.92 
  10   4   1   30.20    0.87 
  10  -4  -1   29.07    0.94 
  10   4   1   30.07    0.90 
  10   4   1   29.78    0.91 
  10   4   1   30.53    0.90 
 -10   4   1   30.24    1.00 
 -10  -4  -1   30.26    0.93 
 -10  -4  -1   31.26    0.87 
 -10   4   1   30.16    0.99 
 -10   4   1   30.33    0.91 
 -10   4   1   29.26    0.92 
  10   5   1    0.99    0.18 
  10   5   1    1.23    0.18 
  10  -5  -1    1.28    0.23 
  10   5   1    1.11    0.18 
  10  -5  -1    0.65    0.18 
  10   5   1    0.83    0.16 
 -10   5   1    1.35    0.25 
 -10   5   1    1.22    0.19 
 -10  -5  -1    1.24    0.16 
 -10  -5  -1    1.08    0.19 
 -10   5   1    1.11    0.24 
 -10   5   1    1.11    0.20 
  10  -6  -1   12.61    0.57 
  10   6   1   12.35    0.46 
  10   6   1   11.84    0.48 
  10   6   1   12.51    0.49 
  10  -6  -1   11.52    0.49 
  10   6   1   11.43    0.49 
 -10   6   1   10.91    0.58 
 -10  -6  -1   11.12    0.49 
 -10   6   1   11.44    0.53 
 -10   6   1   11.10    0.53 
 -10  -6  -1   12.04    0.43 
 -10   6   1   11.17    0.58 
  10   7   1    4.50    0.30 
  10   7   1    4.50    0.33 
  10   7   1    4.43    0.33 
  10  -7  -1    4.00    0.34 
  10   7   1    4.06    0.32 
  10  -7  -1    3.69    0.39 
 -10   7   1    4.10    0.40 
 -10   7   1    3.92    0.42 
 -10  -7  -1    4.01    0.31 
 -10   7   1    4.72    0.47 
 -10   7   1    4.78    0.40 
 -10  -7  -1    4.27    0.27 
  10   8   1    0.47    0.17 
  10  -8  -1    0.39    0.26 
  10   8   1    0.16    0.14 
  10   8   1    0.44    0.17 
  10   8   1    0.22    0.16 
  10  -8  -1    0.32    0.17 
 -10  -8  -1    0.44    0.13 
 -10   8   1    0.02    0.23 
 -10   8   1    0.22    0.22 
 -10   8   1    0.33    0.22 
 -10   8   1    0.28    0.22 
 -10  -8  -1   -0.13    0.10 
 -10   8   1    0.20    0.23 
  10   9   1    3.61    0.33 
  10  -9  -1    3.21    0.33 
  10   9   1    3.19    0.32 
  10   9   1    2.67    0.30 
  10   9   1    2.75    0.32 
 -10   9   1    2.78    0.33 
 -10  -9  -1    3.08    0.25 
 -10   9   1    2.68    0.32 
 -10   9   1    2.63    0.33 
 -10   9   1    2.81    0.33 
  10  10   1    2.34    0.25 
  10 -10  -1    2.44    0.25 
  10  10   1    2.19    0.27 
  10  10   1    2.27    0.25 
  10  10   1    2.44    0.24 
 -10  10   1    2.04    0.33 
 -10  10   1    1.63    0.33 
 -10  10   1    2.25    0.35 
 -10  10   1    1.77    0.31 
  10  11   1    8.45    0.48 
  10  11   1    8.70    0.49 
  10  11   1    9.09    0.47 
  10  11   1    9.24    0.47 
  10 -11  -1    9.09    0.46 
 -10  11   1    9.43    0.65 
 -10  11   1    7.73    0.65 
 -10  11   1    8.79    0.68 
 -10  11   1    8.30    0.63 
  10  12   1    0.61    0.23 
  10 -12  -1    0.41    0.21 
  10  12   1    0.51    0.24 
  10  12   1    0.65    0.22 
 -10  12   1    0.33    0.30 
 -10  12   1    0.68    0.33 
 -10  12   1    0.14    0.34 
  11 -11   1    2.28    0.30 
  11  11  -1    2.68    0.48 
  11 -11   1    2.68    0.34 
  11  11  -1    1.90    0.29 
 -11  11  -1    2.93    0.45 
 -11  11  -1    1.73    0.36 
 -11 -11   1    2.42    0.27 
 -11  11  -1    1.97    0.38 
  11 -10   1    7.00    0.52 
  11  10  -1    5.44    0.45 
  11 -10   1    6.12    0.47 
  11  10  -1    5.95    0.50 
  11  10  -1    6.13    0.49 
  11  10  -1    5.83    0.44 
 -11  10  -1    6.93    0.62 
 -11  10  -1    5.84    0.62 
 -11  10  -1    5.78    0.62 
 -11 -10   1    6.29    0.36 
 -11  10  -1    5.35    0.65 
 -11 -10   1    5.56    0.36 
  11   9  -1    4.29    0.44 
  11   9  -1    3.99    0.42 
  11  -9   1    4.43    0.44 
  11  -9   1    4.30    0.42 
  11   9  -1    4.29    0.39 
  11   9  -1    4.02    0.38 
 -11   9  -1    3.82    0.43 
 -11  -9   1    4.24    0.35 
 -11  -9   1    4.24    0.30 
 -11   9  -1    3.56    0.41 
 -11   9  -1    4.26    0.50 
 -11   9  -1    4.88    0.49 
  11   8  -1    1.66    0.23 
  11   8  -1    1.48    0.24 
  11  -8   1    1.69    0.27 
  11  -8   1    1.42    0.26 
  11   8  -1    1.03    0.22 
  11   8  -1    1.50    0.24 
 -11   8  -1    1.63    0.31 
 -11  -8   1    1.57    0.23 
 -11   8  -1    1.21    0.27 
 -11  -8   1    1.44    0.18 
 -11   8  -1    1.20    0.30 
 -11   8  -1    1.52    0.35 
  11   7  -1   23.83    0.78 
  11  -7   1   22.30    0.80 
  11   7  -1   22.99    0.77 
  11  -7   1   22.55    0.82 
  11   7  -1   23.01    0.79 
  11   7  -1   23.62    0.78 
 -11  -7   1   24.42    0.79 
 -11   7  -1   24.13    0.94 
 -11   7  -1   24.50    0.89 
 -11   7  -1   23.13    0.86 
 -11  -7   1   23.57    0.71 
 -11   7  -1   23.59    0.91 
 -11  -7   1   22.49    0.75 
  11   6  -1    3.40    0.34 
  11  -6   1    4.13    0.37 
  11  -6   1    4.00    0.39 
  11  -6   1    4.30    0.42 
  11   6  -1    3.93    0.33 
  11   6  -1    4.19    0.35 
  11   6  -1    4.12    0.37 
 -11  -6   1    4.04    0.34 
 -11   6  -1    4.10    0.47 
 -11  -6   1    4.32    0.36 
 -11   6  -1    3.54    0.39 
 -11  -6   1    4.13    0.28 
 -11   6  -1    3.45    0.39 
 -11   6  -1    3.04    0.39 
 -11   6  -1    3.07    0.33 
  11  -5   1   31.07    0.97 
  11   5  -1   29.19    0.92 
  11  -5   1   30.67    0.97 
  11   5  -1   30.86    0.94 
  11  -5   1   31.32    1.01 
  11   5  -1   30.84    0.95 
  11   5  -1   31.59    0.93 
 -11  -5   1   31.23    0.97 
 -11   5  -1   30.26    0.98 
 -11  -5   1   30.57    0.88 
 -11   5  -1   30.41    0.98 
 -11   5  -1   30.18    1.04 
 -11  -5   1   30.25    0.94 
 -11   5  -1   29.81    1.06 
  11  -4   1    1.30    0.23 
  11  -4   1    1.66    0.26 
  11  -4   1    0.95    0.20 
  11   4  -1    1.21    0.20 
  11   4  -1    1.26    0.21 
  11   4  -1    1.44    0.21 
  11   4  -1    1.24    0.21 
 -11   4  -1    0.96    0.25 
 -11  -4   1    1.26    0.18 
 -11   4  -1    1.29    0.23 
 -11   4  -1    1.10    0.20 
 -11  -4   1    1.23    0.23 
 -11   4  -1    1.27    0.22 
 -11  -4   1    1.29    0.20 
  11   3  -1    0.83    0.18 
  11   3  -1    1.18    0.21 
  11  -3   1    0.95    0.21 
  11  -3   1    0.56    0.18 
  11   3  -1    0.92    0.19 
  11   3  -1    1.37    0.21 
 -11   3  -1    1.30    0.23 
 -11   3  -1    0.76    0.26 
 -11   3  -1    1.45    0.24 
 -11   3  -1    1.15    0.19 
 -11  -3   1    1.24    0.24 
 -11  -3   1    1.18    0.17 
 -11   3  -1    1.20    0.22 
  11   2  -1   12.38    0.53 
  11   2  -1   13.08    0.54 
  11  -2   1   12.76    0.54 
  11  -2   1   12.66    0.55 
  11  -2   1   13.27    0.55 
  11   2  -1   12.72    0.52 
  11   2  -1   13.82    0.54 
 -11  -2   1   12.07    0.50 
 -11  -2   1   12.36    0.57 
 -11   2  -1   11.95    0.61 
 -11   2  -1   12.87    0.59 
 -11   2  -1    9.50    0.69 
 -11   2  -1   12.61    0.48 
  11   1  -1   32.41    0.96 
  11  -1   1   32.94    0.99 
  11   1  -1   32.05    0.96 
  11   1  -1   28.24    1.18 
  11  -1   1   31.93    0.97 
  11  -1   1   25.93    0.93 
  11   1  -1   33.15    0.98 
  11  -1   1   31.57    0.96 
 -11  -1   1   29.49    0.92 
 -11   1  -1   31.32    1.04 
 -11   1  -1   31.69    1.01 
 -11   1  -1   30.95    0.93 
 -11   1  -1   32.30    0.87 
 -11  -1   1   31.52    1.01 
 -11  -1   1   31.77    0.77 
  11   0  -1    1.05    0.18 
  11   0  -1    1.27    0.20 
  11   0   1    1.18    0.20 
  11   0  -1    1.24    0.20 
  11   0   1    1.33    0.19 
  11   0   1    0.98    0.20 
  11   0  -1    1.09    0.20 
  11   0   1    1.23    0.20 
 -11   0   1    1.06    0.22 
 -11   0  -1    1.16    0.23 
 -11   0  -1    1.13    0.18 
 -11   0  -1    1.52    0.18 
 -11   0   1    1.13    0.12 
 -11   0   1    1.31    0.24 
  11  -1  -1   32.86    1.00 
  11   1   1   32.98    0.96 
  11   1   1   31.28    0.97 
  11  -1  -1   31.92    0.97 
  11   1   1   32.05    0.98 
  11   1   1   31.30    0.98 
 -11   1   1   32.68    1.05 
 -11   1   1   30.17    1.02 
 -11  -1  -1   32.61    0.81 
 -11  -1  -1   32.03    1.04 
 -11   1   1   32.40    0.87 
 -11   1   1   31.50    1.04 
 -11  -1  -1   31.52    0.79 
  11  -2  -1   13.08    0.56 
  11   2   1   12.51    0.51 
  11  -2  -1   11.85    0.52 
  11   2   1   12.37    0.52 
  11   2   1   11.45    0.52 
  11   2   1   12.29    0.53 
 -11   2   1   12.69    0.61 
 -11  -2  -1   12.63    0.59 
 -11   2   1   13.19    0.46 
 -11   2   1   12.67    0.53 
 -11   2   1   13.52    0.61 
  11   3   1    1.32    0.21 
  11  -3  -1    0.84    0.19 
  11   3   1    0.99    0.19 
  11  -3  -1    0.85    0.21 
  11   3   1    1.32    0.21 
  11   3   1    1.11    0.21 
 -11   3   1    1.11    0.18 
 -11   3   1    1.20    0.25 
 -11   3   1    0.93    0.21 
 -11   3   1    0.64    0.42 
 -11  -3  -1    0.97    0.22 
  11   4   1    1.25    0.21 
  11  -4  -1    0.87    0.21 
  11  -4  -1    1.14    0.21 
  11   4   1    1.21    0.21 
  11  -4  -1    1.35    0.22 
  11   4   1    1.27    0.19 
  11   4   1    1.46    0.22 
 -11  -4  -1    1.19    0.23 
 -11  -4  -1    1.22    0.20 
 -11   4   1    0.88    0.23 
 -11   4   1    1.15    0.21 
 -11   4   1    1.48    0.21 
 -11   4   1    1.29    0.21 
 -11   4   1    0.99    0.24 
  11   5   1   30.72    0.94 
  11   5   1   30.53    0.95 
  11  -5  -1   29.94    1.01 
  11   5   1   31.69    0.92 
  11  -5  -1   30.73    0.98 
  11   5   1   30.78    0.96 
  11  -5  -1   30.30    0.96 
 -11   5   1   30.15    0.99 
 -11   5   1   31.97    1.07 
 -11  -5  -1   29.95    0.96 
 -11   5   1   30.61    0.98 
 -11   5   1   31.10    0.97 
 -11   5   1   31.52    1.07 
 -11  -5  -1   30.47    0.95 
  11   6   1    3.77    0.36 
  11   6   1    3.74    0.36 
  11  -6  -1    4.40    0.42 
  11   6   1    4.25    0.35 
  11  -6  -1    4.46    0.44 
  11  -6  -1    3.86    0.35 
  11   6   1    4.22    0.34 
 -11  -6  -1    3.88    0.38 
 -11  -6  -1    3.82    0.33 
 -11   6   1    3.65    0.39 
 -11   6   1    3.57    0.42 
 -11   6   1    3.88    0.40 
 -11   6   1    4.76    0.49 
  11   7   1   24.31    0.75 
  11  -7  -1   22.87    0.78 
  11   7   1   23.52    0.78 
  11   7   1   24.00    0.79 
  11   7   1   23.25    0.80 
  11  -7  -1   23.09    0.82 
 -11   7   1   23.18    0.93 
 -11   7   1   22.38    0.91 
 -11  -7  -1   22.12    0.74 
 -11  -7  -1   21.85    0.76 
 -11   7   1   24.48    0.87 
 -11   7   1   23.08    0.86 
  11   8   1    1.55    0.25 
  11  -8  -1    1.18    0.27 
  11   8   1    1.85    0.26 
  11   8   1    1.50    0.22 
  11  -8  -1    1.58    0.25 
  11   8   1    1.58    0.25 
 -11   8   1    1.25    0.31 
 -11  -8  -1    1.46    0.21 
 -11   8   1    0.71    0.23 
 -11   8   1    1.27    0.29 
 -11   8   1    1.54    0.33 
  11   9   1    4.87    0.42 
  11  -9  -1    4.13    0.45 
  11   9   1    4.80    0.39 
  11  -9  -1    4.07    0.40 
  11   9   1    4.58    0.43 
  11   9   1    4.14    0.41 
 -11   9   1    4.73    0.48 
 -11  -9  -1    3.99    0.32 
 -11   9   1    4.56    0.54 
 -11   9   1    4.04    0.48 
 -11   9   1    4.28    0.46 
  11  10   1    6.23    0.45 
  11 -10  -1    6.32    0.45 
  11  10   1    6.12    0.46 
  11  10   1    6.11    0.47 
  11  10   1    5.99    0.49 
  11 -10  -1    6.64    0.52 
 -11  10   1    5.55    0.57 
 -11 -10  -1    6.80    0.33 
 -11  10   1    6.57    0.65 
 -11  10   1    6.12    0.62 
 -11  10   1    5.67    0.53 
  11  11   1    2.95    0.32 
  11 -11  -1    2.10    0.30 
  11  11   1    2.34    0.32 
  11 -11  -1    2.76    0.34 
 -11  11   1    2.51    0.41 
 -11  11   1    2.20    0.40 
 -11  11   1    2.29    0.42 
  12  10  -1    0.33    0.28 
  12  10  -1    0.75    0.26 
  12 -10   1    1.01    0.30 
 -12  10  -1    0.77    0.37 
 -12  10  -1    0.94    0.36 
 -12  10  -1    1.41    0.73 
 -12  10  -1    0.43    0.38 
  12   9  -1    1.77    0.27 
  12   9  -1    2.38    0.32 
  12   9  -1    2.30    0.35 
  12   9  -1    2.32    0.33 
  12  -9   1    1.87    0.32 
 -12   9  -1    2.50    0.47 
 -12   9  -1    2.23    0.41 
 -12   9  -1    1.65    0.41 
 -12   9  -1    1.82    0.38 
  12   8  -1    0.73    0.25 
  12   8  -1    0.21    0.24 
  12  -8   1    0.34    0.25 
  12   8  -1    0.13    0.21 
  12   8  -1    0.91    0.29 
 -12   8  -1    0.80    0.38 
 -12   8  -1    0.32    0.28 
 -12   8  -1    0.32    0.27 
 -12   8  -1    0.05    0.34 
  12  -7   1    0.66    0.26 
  12   7  -1    0.92    0.26 
  12   7  -1    1.14    0.23 
  12   7  -1    1.08    0.26 
  12   7  -1    0.93    0.27 
 -12   7  -1    1.10    0.29 
 -12   7  -1    0.82    0.35 
 -12   7  -1    1.51    0.30 
 -12   7  -1    0.97    0.34 
  12   6  -1    5.25    0.43 
  12   6  -1    5.53    0.44 
  12  -6   1    6.10    0.48 
  12   6  -1    5.54    0.47 
  12   6  -1    5.79    0.42 
 -12   6  -1    4.70    0.56 
 -12   6  -1    4.38    0.55 
 -12   6  -1    5.51    0.47 
 -12  -6   1    5.32    0.43 
 -12   6  -1    4.79    0.47 
  12   5  -1   29.63    0.97 
  12   5  -1   28.75    0.94 
  12   5  -1   29.36    0.95 
  12   5  -1   29.81    0.96 
  12  -5   1   27.89    1.19 
  12  -5   1   29.45    0.97 
 -12   5  -1   28.66    0.98 
 -12   5  -1   28.96    1.09 
 -12  -5   1   30.41    0.97 
 -12   5  -1   30.02    0.98 
 -12   5  -1   30.15    1.08 
  12   4  -1   10.65    0.54 
  12   4  -1    9.98    0.52 
  12  -4   1    9.83    0.53 
  12  -4   1   10.80    0.60 
  12   4  -1   10.36    0.51 
  12   4  -1   10.20    0.54 
 -12   4  -1   10.78    0.54 
 -12   4  -1   10.59    0.52 
 -12   4  -1   10.29    0.66 
 -12   4  -1   10.27    0.63 
 -12  -4   1   11.15    0.57 
  12  -3   1   -0.23    0.20 
  12   3  -1    0.36    0.20 
  12   3  -1    0.19    0.18 
  12  -3   1    0.24    0.20 
  12  -3   1    0.10    0.31 
  12   3  -1    0.24    0.18 
  12   3  -1   -0.18    0.19 
 -12   3  -1    0.39    0.18 
 -12   3  -1    0.43    0.28 
 -12   3  -1    0.27    0.20 
 -12  -3   1    0.42    0.23 
 -12   3  -1    0.60    0.23 
 -12  -3   1    0.52    0.29 
 -12   3  -1    0.25    0.18 
  12  -2   1    6.41    0.45 
  12   2  -1    6.35    0.44 
  12  -2   1    5.95    0.42 
  12   2  -1    6.88    0.43 
  12   2  -1    6.18    0.44 
  12   2  -1    6.49    0.42 
  12  -2   1    6.56    0.44 
  12  -2   1    6.89    0.45 
 -12   2  -1    6.43    0.43 
 -12   2  -1    5.99    0.40 
 -12   2  -1    6.31    0.55 
 -12   2  -1    6.34    0.49 
 -12  -2   1    6.44    0.47 
 -12   2  -1    6.70    0.38 
 -12  -2   1    6.25    0.50 
  12  -1   1    3.84    0.39 
  12  -1   1    4.33    0.38 
  12   1  -1    4.41    0.40 
  12   1  -1    4.33    0.36 
  12   1  -1    4.14    0.37 
  12  -1   1    4.19    0.38 
  12   1  -1    3.99    0.38 
  12  -1   1    4.87    0.40 
 -12  -1   1    4.39    0.45 
 -12   1  -1    2.97    0.34 
 -12   1  -1    3.71    0.34 
 -12  -1   1    3.39    0.42 
 -12   1  -1    3.26    0.41 
 -12   1  -1    4.16    0.28 
 -12   1  -1    4.54    0.36 
  12   0  -1   10.37    0.52 
  12   0   1   10.75    0.52 
  12   0   1   10.06    0.53 
  12   0  -1   11.58    0.54 
  12   0   1   10.62    0.51 
  12   0   1    9.71    0.51 
  12   0  -1   10.30    0.50 
 -12   0   1   10.11    0.35 
 -12   0  -1   10.58    0.37 
 -12   0  -1    9.92    0.34 
 -12   0  -1    9.97    0.60 
 -12   0   1    9.90    0.59 
 -12   0   1   10.87    0.52 
 -12   0  -1   11.30    0.52 
 -12   0  -1   11.46    0.57 
 -12   0   1   10.17    0.57 
  12   1   1    4.00    0.38 
  12   1   1    4.24    0.37 
  12  -1  -1    3.84    0.37 
  12  -1  -1    4.62    0.41 
  12   1   1    3.44    0.38 
  12   1   1    3.23    0.37 
  12  -1  -1    3.38    0.36 
 -12   1   1    4.17    0.37 
 -12  -1  -1    3.92    0.16 
 -12   1   1    4.31    0.37 
 -12   1   1    4.07    0.26 
 -12   1   1    4.25    0.47 
 -12   1   1    4.03    0.44 
 -12  -1  -1    3.86    0.45 
 -12  -1  -1    3.91    0.35 
 -12  -1  -1    4.42    0.41 
 -12  -1  -1    4.17    0.18 
  12   2   1    6.72    0.42 
  12  -2  -1    6.42    0.46 
  12   2   1    6.28    0.45 
  12   2   1    6.57    0.42 
  12   2   1    6.33    0.42 
  12  -2  -1    6.24    0.45 
  12  -2  -1    5.64    0.40 
 -12  -2  -1    5.44    0.46 
 -12   2   1    6.77    0.51 
 -12   2   1    6.07    0.43 
 -12   2   1    6.76    0.54 
 -12  -2  -1    5.89    0.50 
 -12   2   1    6.55    0.43 
 -12   2   1    6.23    0.34 
 -12  -2  -1    6.34    0.40 
  12   3   1    0.47    0.20 
  12   3   1    0.29    0.20 
  12  -3  -1    0.16    0.20 
  12   3   1    0.13    0.17 
  12  -3  -1    0.09    0.22 
  12   3   1    0.38    0.19 
 -12   3   1    0.38    0.25 
 -12   3   1    0.33    0.26 
 -12  -3  -1    0.14    0.23 
 -12  -3  -1    0.14    0.15 
 -12  -3  -1   -0.18    0.21 
 -12   3   1    0.30    0.17 
 -12   3   1   -0.02    0.18 
 -12   3   1    0.30    0.19 
  12   4   1   10.44    0.51 
  12   4   1    9.88    0.52 
  12   4   1   10.93    0.55 
  12   4   1   10.27    0.51 
  12  -4  -1    9.88    0.54 
  12  -4  -1   10.88    0.59 
 -12   4   1   10.70    0.55 
 -12  -4  -1   10.02    0.58 
 -12   4   1   10.81    0.64 
 -12   4   1   10.57    0.51 
 -12   4   1   11.60    0.67 
 -12  -4  -1   11.15    0.49 
  12   5   1   28.09    0.91 
  12   5   1   28.74    0.96 
  12   5   1   29.35    0.96 
  12  -5  -1   29.00    0.95 
  12   5   1   29.23    0.94 
 -12   5   1   29.65    0.95 
 -12   5   1   29.49    0.99 
 -12  -5  -1   30.57    0.90 
 -12   5   1   29.21    1.07 
 -12  -5  -1   29.29    0.98 
 -12   5   1   29.57    1.09 
  12  -6  -1    6.37    0.47 
  12   6   1    6.21    0.43 
  12   6   1    5.50    0.44 
  12   6   1    5.76    0.43 
  12   6   1    5.28    0.46 
 -12   6   1    5.47    0.50 
 -12   6   1    6.13    0.48 
 -12   6   1    5.99    0.58 
 -12  -6  -1    6.04    0.38 
 -12   6   1    5.52    0.59 
 -12  -6  -1    5.81    0.47 
  12  -7  -1    0.96    0.26 
  12   7   1    1.04    0.25 
  12   7   1    0.69    0.26 
  12   7   1    1.19    0.26 
  12   7   1    1.27    0.25 
 -12   7   1    0.74    0.33 
 -12   7   1    1.28    0.29 
 -12  -7  -1    0.34    0.21 
 -12   7   1    1.57    0.31 
 -12  -7  -1    1.32    0.20 
 -12   7   1    1.03    0.36 
  12   8   1    0.64    0.25 
  12   8   1    0.39    0.24 
  12  -8  -1    0.61    0.25 
  12   8   1    0.17    0.26 
  12   8   1    0.64    0.24 
 -12  -8  -1    0.44    0.19 
 -12   8   1    0.26    0.32 
 -12   8   1    0.52    0.31 
 -12   8   1   -0.09    0.30 
 -12   8   1    0.67    0.29 
  12  -9  -1    2.40    0.31 
  12   9   1    1.79    0.34 
  12   9   1    2.55    0.33 
  12   9   1    1.91    0.31 
 -12   9   1    2.20    0.39 
 -12   9   1    2.00    0.41 
 -12   9   1    1.61    0.38 
 -12  -9  -1    1.60    0.23 
 -12   9   1    2.31    0.39 
  12  10   1    1.08    0.28 
  12  10   1    1.11    0.31 
  12 -10  -1    1.05    0.29 
 -12  10   1    1.65    0.42 
 -12  10   1    0.63    0.49 
 -12  10   1    0.81    0.40 
 -12  10   1    1.09    0.37 
  13   9  -1   11.81    0.68 
  13   8  -1    4.75    0.42 
  13   8  -1    5.10    0.59 
  13  -8   1    5.45    0.54 
  13   8  -1    4.78    0.51 
 -13   8  -1    5.19    0.65 
 -13   8  -1    3.96    0.43 
 -13   8  -1    5.12    0.56 
  13   7  -1    7.15    0.53 
  13  -7   1    7.16    0.55 
  13   7  -1    6.15    0.59 
  13   7  -1    7.40    0.55 
 -13  -7   1    6.70    0.45 
 -13   7  -1    7.04    0.62 
 -13   7  -1    6.87    0.59 
 -13   7  -1    5.72    0.57 
  13  -6   1   14.54    0.73 
  13   6  -1   16.11    0.71 
  13   6  -1   16.31    0.71 
  13   6  -1   16.05    0.74 
 -13   6  -1   15.65    0.89 
 -13  -6   1   15.41    0.63 
 -13   6  -1   16.71    0.76 
 -13   6  -1   16.05    0.76 
  13   5  -1    3.76    0.43 
  13   5  -1    4.79    0.50 
  13   5  -1    3.57    0.43 
  13  -5   1    4.17    0.46 
 -13   5  -1    3.45    0.49 
 -13   5  -1    3.58    0.37 
 -13  -5   1    3.21    0.36 
 -13  -5   1    3.68    0.38 
 -13   5  -1    3.93    0.47 
  13   4  -1    0.67    0.26 
  13   4  -1    0.90    0.24 
  13  -4   1    0.22    0.25 
  13   4  -1    0.79    0.26 
 -13   4  -1    0.70    0.27 
 -13  -4   1    0.61    0.27 
 -13   4  -1    0.12    0.31 
 -13   4  -1    0.90    0.24 
 -13  -4   1    0.87    0.21 
  13  -3   1    2.34    0.32 
  13   3  -1    2.87    0.31 
  13   3  -1    3.52    0.42 
  13   3  -1    3.12    0.34 
 -13   3  -1    2.16    0.38 
 -13   3  -1    3.39    0.34 
 -13  -3   1    3.25    0.31 
 -13   3  -1    3.70    0.38 
 -13  -3   1    3.17    0.37 
  13   2  -1    5.99    0.45 
  13  -2   1    5.49    0.46 
  13   2  -1    5.37    0.49 
  13  -2   1    5.92    0.52 
  13   2  -1    5.19    0.44 
 -13  -2   1    5.77    0.43 
 -13  -2   1    5.78    0.54 
 -13   2  -1    5.71    0.37 
 -13   2  -1    4.93    0.44 
 -13   2  -1    4.66    0.59 
  13  -1   1   14.20    0.67 
  13   1  -1   13.93    0.63 
  13  -1   1   13.54    0.64 
  13   1  -1   13.04    0.66 
  13  -1   1   14.41    0.67 
 -13   1  -1   14.51    0.50 
 -13  -1   1   14.13    0.62 
 -13  -1   1   13.96    0.74 
 -13   1  -1   13.67    0.47 
 -13   1  -1   13.39    0.75 
 -13   1  -1   14.27    0.61 
  13   0   1    2.60    0.32 
  13   0  -1    3.01    0.34 
  13   0   1    2.72    0.32 
  13   0  -1    2.75    0.32 
  13   0   1    2.51    0.31 
 -13   0  -1    2.36    0.46 
 -13   0  -1    3.25    0.23 
 -13   0   1    2.17    0.60 
 -13   0   1    2.84    0.20 
 -13   0   1    3.35    0.47 
  13   1   1   13.90    0.65 
  13  -1  -1   14.37    0.68 
  13  -1  -1   12.99    0.64 
  13   1   1   14.53    0.65 
  13   1   1   13.83    0.63 
 -13   1   1   13.59    0.73 
 -13   1   1   13.95    0.47 
 -13  -1  -1   13.21    0.73 
  13   2   1    5.40    0.45 
  13   2   1    5.42    0.47 
  13  -2  -1    5.19    0.47 
  13   2   1    5.26    0.45 
 -13   2   1    5.37    0.58 
 -13   2   1    5.81    0.45 
 -13  -2  -1    5.56    0.55 
 -13   2   1    5.95    0.35 
  13  -3  -1    2.86    0.34 
  13   3   1    3.67    0.43 
  13   3   1    2.91    0.34 
  13   3   1    2.76    0.32 
 -13   3   1    3.20    0.41 
 -13  -3  -1    2.30    0.35 
 -13  -3  -1    3.02    0.40 
 -13   3   1    2.97    0.35 
 -13   3   1    3.20    0.34 
  13  -4  -1    0.86    0.26 
  13   4   1    0.83    0.26 
  13   4   1    0.65    0.24 
  13   4   1    1.01    0.26 
 -13  -4  -1    0.74    0.29 
 -13   4   1    0.51    0.25 
 -13  -4  -1    0.64    0.24 
 -13   4   1    0.56    0.22 
 -13   4   1    0.52    0.32 
  13   5   1    3.82    0.36 
  13   5   1    3.96    0.45 
  13   5   1    4.79    0.48 
  13  -5  -1    3.93    0.47 
 -13   5   1    4.32    0.47 
 -13  -5  -1    4.51    0.54 
 -13   5   1    4.13    0.41 
 -13  -5  -1    3.34    0.41 
 -13   5   1    4.13    0.47 
  13   6   1   16.08    0.71 
  13   6   1   16.45    0.73 
  13   6   1   16.43    0.71 
  13  -6  -1   15.41    0.72 
 -13   6   1   17.17    0.78 
 -13   6   1   16.55    0.75 
 -13   6   1   14.51    0.86 
  13   7   1    6.88    0.53 
  13   7   1    7.04    0.55 
  13  -7  -1    6.12    0.55 
  13   7   1    7.05    0.56 
 -13   7   1    6.90    0.62 
 -13   7   1    6.32    0.61 
 -13   7   1    6.90    0.72 
  13  -8  -1    6.19    0.57 
  13   8   1    5.95    0.56 
  13   8   1    5.77    0.56 
 -13   8   1    5.17    0.54 
 -13   8   1    5.32    0.60 
 -13   8   1    4.93    0.50 
  13   9   1   13.28    0.74 
  14   6  -1    4.33    0.52 
  14   6  -1    3.53    0.42 
  14  -6   1    3.90    0.44 
 -14   6  -1    3.94    0.44 
 -14   6  -1    3.80    0.44 
 -14   6  -1    4.13    0.54 
  14   5  -1    2.64    0.37 
  14   5  -1    2.49    0.35 
  14  -5   1    2.20    0.38 
 -14   5  -1    2.29    0.44 
 -14   5  -1    2.48    0.40 
 -14   5  -1    2.95    0.37 
  14  -4   1    1.33    0.33 
  14   4  -1    1.48    0.33 
  14   4  -1    1.26    0.31 
 -14  -4   1    1.62    0.37 
 -14   4  -1    2.00    0.51 
 -14   4  -1    1.52    0.33 
 -14   4  -1    1.25    0.43 
  14   3  -1   22.90    0.89 
  14  -3   1   21.75    0.92 
  14   3  -1   23.95    0.90 
 -14   3  -1   23.64    1.07 
 -14   3  -1   24.02    0.90 
 -14   3  -1   24.57    0.82 
 -14  -3   1   24.06    0.99 
  14  -2   1    3.41    0.38 
  14   2  -1    2.44    0.36 
 -14   2  -1    3.91    0.38 
 -14   2  -1    4.08    0.49 
 -14   2  -1    3.67    0.36 
 -14  -2   1    3.12    0.41 
  14   1  -1    1.97    0.33 
  14  -1   1    2.27    0.35 
 -14   1  -1    1.63    0.42 
 -14  -1   1    2.24    0.37 
  14   0  -1    6.61    0.53 
  14   0   1    7.07    0.55 
  14   0   1    6.39    0.54 
 -14   0  -1    6.95    0.69 
 -14   0   1    7.43    0.70 
  14   1   1    2.09    0.34 
  14  -1  -1    2.12    0.34 
  14   1   1    2.07    0.35 
  14   1   1    2.39    0.36 
 -14  -1  -1    2.28    0.40 
 -14   1   1    2.00    0.42 
  14  -2  -1    3.32    0.38 
  14   2   1    3.38    0.38 
  14   2   1    3.00    0.38 
  14   2   1    3.71    0.39 
 -14   2   1    3.38    0.35 
 -14  -2  -1    2.98    0.44 
 -14   2   1    3.84    0.49 
  14   3   1   25.52    0.93 
  14   3   1   24.69    0.94 
  14   3   1   24.05    0.92 
  14  -3  -1   22.51    0.90 
 -14   3   1   24.51    1.08 
 -14   3   1   24.39    0.93 
 -14  -3  -1   25.07    1.04 
 -14   3   1   24.78    0.82 
  14   4   1    1.55    0.32 
  14   4   1    1.37    0.32 
  14   4   1    1.36    0.31 
  14  -4  -1    1.65    0.34 
 -14   4   1    1.90    0.45 
 -14  -4  -1    1.82    0.41 
 -14   4   1    1.84    0.34 
 -14   4   1    1.65    0.28 
  14   5   1    2.55    0.38 
  14   5   1    2.48    0.35 
  14   5   1    2.83    0.39 
  14  -5  -1    3.32    0.40 
 -14   5   1    2.72    0.48 
 -14   5   1    3.19    0.37 
 -14   5   1    2.82    0.42 
  14  -6  -1    3.55    0.41 
  14   6   1    4.72    0.46 
  14   6   1    4.48    0.44 
 -14   6   1    3.20    0.43 
 -14   6   1    4.15    0.55 
 -14   6   1    4.26    0.44 
  15   3  -1    2.92    0.42 
 -15   3  -1    2.93    0.40 
  15   2  -1    2.34    0.39 
 -15  -2   1    2.02    0.47 
 -15   2  -1    2.00    0.48 
  15   1  -1    1.56    0.38 
  15  -1   1    1.17    0.43 
 -15   1  -1    1.20    0.46 
 -15  -1   1    1.35    0.42 
  15   0  -1   21.77    0.94 
  15   0   1   22.75    0.96 
 -15   0   1   24.47    1.10 
 -15   0  -1   21.91    1.11 
  15  -1  -1    1.19    0.54 
  15   1   1    1.89    0.38 
  15   1   1    1.74    0.35 
 -15  -1  -1    1.53    0.49 
 -15   1   1    1.78    0.46 
  15   2   1    1.50    0.36 
  15   2   1    2.00    0.40 
 -15  -2  -1    2.93    0.54 
 -15   2   1    2.18    0.54 
  15   3   1    3.95    0.46 
  15   3   1    3.12    0.43 
   0  17  -2   -0.02    0.17 
   0  17  -2    0.14    0.37 
   0  17  -2    0.34    0.38 
   0  16  -2    1.58    0.24 
   0  16  -2    0.78    0.31 
   0  16  -2    1.10    0.33 
   0  16  -2    1.55    0.26 
   0  16  -2    1.38    0.18 
   0  15  -2   13.34    0.54 
   0  15  -2   12.93    0.45 
   0  15  -2   13.18    0.67 
   0  15  -2   13.04    0.48 
   0  15  -2   12.76    0.71 
   0  14  -2    1.33    0.28 
   0  14  -2    1.18    0.27 
   0  14  -2    1.30    0.17 
   0  13  -2    0.15    0.17 
   0  13  -2   -0.14    0.19 
   0  13  -2   -0.05    0.10 
   0  13  -2    0.07    0.04 
   0  12  -2    2.53    0.16 
   0  12  -2    2.46    0.11 
   0  12  -2    2.87    0.18 
   0  12  -2    2.57    0.30 
   0  11  -2   33.32    0.85 
   0  11  -2   34.10    0.86 
   0  11  -2   33.74    0.99 
   0  11  -2   34.07    0.82 
   0  10  -2   30.52    0.74 
   0  10  -2   29.58    0.88 
   0  10  -2   29.76    0.78 
   0  10  -2   30.42    0.76 
   0   9  -2    0.34    0.11 
   0  -9   2    0.43    0.07 
   0   9  -2    0.34    0.05 
   0   9  -2    0.41    0.06 
   0  -8   2    1.64    0.11 
   0   8  -2    1.60    0.09 
   0   8  -2    1.74    0.08 
   0   8  -2    1.61    0.16 
   0   7  -2   23.43    0.56 
   0   7  -2   23.30    0.56 
   0   7  -2   22.00    0.64 
   0  -7   2   20.97    0.59 
   0   6  -2   27.63    0.67 
   0   6  -2   26.64    0.73 
   0   6  -2   28.08    0.67 
   0   5  -2   35.36    0.81 
   0   5  -2   31.39    0.86 
   0   5  -2   35.07    0.82 
   0   4  -2   78.05    1.93 
   0   4  -2   81.13    1.90 
   0   4  -2   83.51    1.89 
   0   3  -2    1.43    0.06 
   0  -3   2    1.41    0.05 
   0   3  -2    1.42    0.06 
   0   3  -2    1.40    0.06 
   0  -2   2    0.01    0.01 
   0  -2   2    0.04    0.01 
   0   2  -2    0.05    0.02 
   0  -2   2    0.01    0.01 
   0   2  -2    0.05    0.01 
   0  -1   2  635.06   14.65 
   0   1  -2  610.93   14.66 
   0   1  -2  676.41   14.75 
   0  -1   2  596.01   14.66 
   0   0   2  120.05    2.89 
   0   0  -2  123.53    2.88 
   0   0  -2  117.59    2.89 
   0   0  -2  130.22    2.93 
   0   1   2  676.73   15.47 
   0   1   2  658.80   15.35 
   0  -1  -2  654.02   15.46 
   0   1   2  641.97   15.36 
   0  -1  -2  673.28   15.36 
   0  -2  -2    0.02    0.01 
   0  -2  -2    0.01    0.02 
   0  -2  -2    0.03    0.01 
   0   2   2    0.01    0.01 
   0   2   2    0.06    0.01 
   0   3   2    1.28    0.08 
   0   3   2    1.32    0.07 
   0  -3  -2    1.36    0.07 
   0   3   2    1.22    0.05 
   0  -3  -2    1.26    0.06 
   0   3   2    1.27    0.05 
   0  -3  -2    1.15    0.08 
   0   4   2   82.07    1.85 
   0   4   2   76.35    1.91 
   0  -4  -2   78.80    1.91 
   0   4   2   82.98    1.84 
   0   4   2   67.96    1.85 
   0  -4  -2   80.47    1.88 
   0  -4  -2   81.12    1.86 
   0   4   2   83.42    1.88 
   0  -5  -2   33.98    0.86 
   0   5   2   34.89    0.83 
   0   5   2   34.31    0.90 
   0   5   2   35.37    0.81 
   0   5   2   34.12    0.87 
   0  -5  -2   34.22    0.84 
   0   6   2   28.29    0.65 
   0   6   2   27.23    0.75 
   0  -6  -2   27.17    0.68 
   0   6   2   24.88    0.66 
   0  -6  -2   26.78    0.70 
   0   6   2   27.55    0.72 
   0   6   2   28.11    0.66 
   0   7   2   23.60    0.56 
   0   7   2   23.96    0.55 
   0   7   2   21.80    0.67 
   0   7   2   23.38    0.64 
   0   7   2   23.10    0.56 
   0   7   2   21.57    0.58 
   0  -7  -2   23.14    0.62 
   0   8   2    1.69    0.18 
   0   8   2    1.86    0.08 
   0   8   2    1.87    0.10 
   0  -8  -2    1.97    0.14 
   0   8   2    1.88    0.08 
   0   8   2    1.80    0.16 
   0   8   2    1.57    0.10 
   0   9   2    0.37    0.04 
   0   9   2    0.39    0.06 
   0   9   2    0.32    0.06 
   0   9   2    0.43    0.12 
   0   9   2    0.26    0.10 
   0   9   2    0.42    0.04 
   0  10   2   29.74    0.85 
   0  10   2   30.16    0.71 
   0  10   2   28.60    0.73 
   0  10   2   29.62    0.74 
   0  10   2   28.08    0.88 
   0  10   2   30.64    0.72 
   0  11   2   33.96    0.85 
   0  11   2   32.96    0.83 
   0  11   2   33.54    0.96 
   0  11   2   33.75    1.01 
   0  12   2    2.99    0.30 
   0  12   2    2.89    0.18 
   0  12   2    2.55    0.16 
   0  12   2    2.91    0.33 
   0  13   2   -0.04    0.17 
   0  13   2    0.03    0.11 
   0  13   2   -0.05    0.19 
   0  13   2    0.15    0.09 
   0  14   2    1.16    0.16 
   0  14   2    1.24    0.27 
   0  14   2    1.38    0.14 
   0  14   2    1.30    0.23 
   0  14   2    1.30    0.17 
   0  15   2   13.48    0.48 
   0  15   2   13.32    0.65 
   0  15   2   13.56    0.70 
   0  15   2   12.20    0.49 
   0  15   2   12.55    0.44 
   0  16   2    1.42    0.33 
   0  16   2    1.24    0.20 
   0  16   2    1.15    0.32 
   0  17   2   -0.04    0.19 
   0  17   2    0.14    0.37 
   0  17   2    0.06    0.36 
   1  17  -2    0.29    0.36 
   1  17  -2    1.02    0.39 
  -1  17  -2    0.44    0.20 
  -1  17  -2    1.20    0.37 
  -1  17  -2    0.23    0.37 
   1  16  -2    2.81    0.31 
   1  16  -2    2.93    0.27 
   1  16  -2    2.55    0.36 
   1  16  -2    2.21    0.38 
  -1  16  -2    2.43    0.30 
  -1  16  -2    2.15    0.41 
  -1  16  -2    2.22    0.36 
  -1  16  -2    2.52    0.28 
   1  15  -2    1.80    0.31 
   1  15  -2    1.69    0.18 
   1  15  -2    1.30    0.30 
   1  15  -2    1.75    0.17 
  -1  15  -2    1.75    0.36 
  -1  15  -2    1.35    0.24 
  -1  15  -2    1.67    0.12 
  -1  15  -2    1.68    0.23 
  -1  15  -2    1.39    0.31 
   1  14  -2   11.59    0.62 
   1  14  -2   11.86    0.38 
   1  14  -2   11.69    0.58 
   1  14  -2   11.64    0.39 
  -1  14  -2   11.31    0.59 
  -1  14  -2   11.61    0.37 
  -1  14  -2   11.41    0.33 
  -1  14  -2   12.07    0.63 
  -1  14  -2   12.07    0.46 
  -1  14  -2   11.83    0.49 
   1  13  -2    4.73    0.21 
   1  13  -2    4.72    0.49 
   1  13  -2    4.61    0.38 
   1  13  -2    4.67    0.22 
  -1  13  -2    4.82    0.19 
  -1  13  -2    4.89    0.24 
  -1  13  -2    4.42    0.30 
  -1  13  -2    4.67    0.27 
  -1  13  -2    5.02    0.41 
  -1  13  -2    4.51    0.43 
   1  12  -2    0.61    0.10 
   1  12  -2    0.62    0.08 
   1  12  -2    0.45    0.16 
  -1  12  -2    0.26    0.21 
  -1  12  -2    0.40    0.07 
  -1  12  -2    0.48    0.11 
  -1  12  -2    0.45    0.12 
   1  11  -2   23.11    0.58 
   1  11  -2   22.76    0.73 
  -1  11  -2   23.95    0.65 
  -1  11  -2   23.32    0.60 
  -1  11  -2   23.31    0.64 
  -1  11  -2   21.78    0.74 
   1  10  -2    1.75    0.08 
   1  10  -2    1.73    0.11 
   1  10  -2    1.60    0.09 
   1  10  -2    1.45    0.17 
  -1  10  -2    1.77    0.17 
  -1  10  -2    1.59    0.11 
  -1  10  -2    1.26    0.17 
  -1  10  -2    1.49    0.14 
   1   9  -2   32.05    0.78 
   1   9  -2   33.27    0.77 
   1   9  -2   30.81    0.89 
  -1   9  -2   31.82    0.82 
  -1   9  -2   32.37    0.91 
  -1  -9   2   32.00    0.79 
  -1   9  -2   32.41    0.81 
   1   8  -2   60.94    1.42 
   1   8  -2   58.72    1.52 
   1   8  -2   61.51    1.42 
  -1   8  -2   60.15    1.46 
  -1  -8   2   60.48    1.44 
  -1   8  -2   59.98    1.45 
  -1   8  -2   60.33    1.54 
   1   7  -2   39.12    0.95 
   1   7  -2   40.45    1.03 
   1   7  -2   40.51    0.95 
  -1   7  -2   40.61    0.99 
  -1  -7   2   40.51    0.97 
  -1   7  -2   38.30    1.05 
  -1   7  -2   40.36    0.98 
   1   6  -2   12.21    0.31 
   1  -6   2   10.62    0.35 
   1   6  -2   11.53    0.37 
   1   6  -2   12.24    0.31 
  -1   6  -2   12.76    0.34 
  -1   6  -2   12.99    0.35 
  -1   6  -2   12.99    0.40 
  -1  -6   2   12.74    0.33 
   1   5  -2   13.61    0.35 
   1   5  -2   14.53    0.35 
   1  -5   2   14.55    0.34 
   1  -5   2   13.76    0.40 
   1  -5   2   14.70    0.40 
  -1   5  -2   14.53    0.38 
  -1  -5   2   12.39    0.36 
  -1   5  -2   13.80    0.39 
  -1   5  -2   14.05    0.42 
  -1   5  -2   13.99    0.37 
   1   4  -2   10.19    0.26 
   1  -4   2   10.16    0.26 
   1  -4   2   10.44    0.30 
   1  -4   2   10.18    0.30 
   1  -4   2   10.45    0.28 
   1   4  -2    9.27    0.26 
  -1   4  -2   11.04    0.28 
  -1   4  -2   10.64    0.29 
  -1   4  -2   10.42    0.29 
  -1   4  -2   10.09    0.31 
   1  -3   2   82.54    1.93 
   1   3  -2   79.81    1.92 
   1  -3   2   81.62    1.90 
   1  -3   2   81.13    1.91 
   1   3  -2   82.02    1.89 
   1   3  -2   83.25    1.90 
  -1   3  -2   80.31    1.92 
  -1   3  -2   80.81    1.91 
  -1   3  -2   80.42    1.91 
  -1   3  -2   79.66    1.93 
   1   2  -2   97.37    2.22 
   1  -2   2   99.51    2.22 
   1  -2   2   96.21    2.22 
   1  -2   2   87.95    2.22 
   1  -2   2   96.73    2.21 
   1   2  -2   94.52    2.22 
  -1   2  -2   96.13    2.22 
  -1   2  -2   94.32    2.21 
  -1  -2   2   94.35    2.19 
  -1   2  -2   95.48    2.21 
  -1  -2   2   81.14    2.23 
  -1   2  -2   96.83    2.21 
   1  -1   2    7.15    0.20 
   1  -1   2    7.23    0.20 
   1  -1   2    7.59    0.20 
   1  -1   2    7.70    0.21 
   1   1  -2    7.91    0.20 
   1   1  -2    7.93    0.20 
   1   1  -2    7.96    0.20 
  -1  -1   2    6.86    0.20 
  -1  -1   2    7.60    0.20 
  -1  -1   2    7.16    0.20 
  -1   1  -2    7.33    0.20 
  -1   1  -2    7.29    0.20 
  -1   1  -2    7.39    0.20 
  -1   1  -2    7.29    0.21 
   1   0   2   11.16    0.28 
   1   0  -2   11.20    0.29 
   1   0   2   11.28    0.29 
   1   0   2   10.25    0.28 
   1   0  -2   11.39    0.28 
  -1   0   2   11.14    0.28 
  -1   0  -2   10.93    0.27 
  -1   0   2   11.10    0.28 
  -1   0  -2   10.78    0.28 
  -1   0  -2   10.88    0.28 
  -1   0   2   10.67    0.28 
  -1   0  -2   11.19    0.28 
   1  -1  -2    6.92    0.21 
   1   1   2    7.46    0.21 
   1   1   2    7.47    0.20 
   1   1   2    7.43    0.20 
   1  -1  -2    7.73    0.21 
   1   1   2    7.71    0.21 
   1  -1  -2    7.77    0.20 
  -1  -1  -2    7.56    0.20 
  -1   1   2    7.68    0.20 
  -1  -1  -2    8.52    0.21 
  -1   1   2    7.54    0.21 
  -1  -1  -2    7.80    0.20 
  -1   1   2    7.87    0.21 
  -1   1   2    7.43    0.21 
   1   2   2   96.58    2.21 
   1   2   2   95.18    2.22 
   1  -2  -2   97.79    2.25 
   1  -2  -2   91.74    2.23 
   1   2   2   91.94    2.22 
   1   2   2   96.77    2.20 
   1  -2  -2   94.72    2.22 
   1  -2  -2   94.95    2.23 
   1   2   2   91.41    2.22 
  -1   2   2   96.82    2.24 
  -1  -2  -2   95.52    2.23 
  -1  -2  -2   93.13    2.22 
  -1   2   2   95.21    2.21 
  -1  -2  -2   96.61    2.23 
  -1   2   2   92.29    2.23 
  -1   2   2   95.86    2.22 
   1   3   2   82.27    1.91 
   1   3   2   80.51    1.91 
   1  -3  -2   79.86    1.92 
   1  -3  -2   80.20    1.90 
   1   3   2   79.83    1.92 
   1  -3  -2   80.48    1.89 
   1   3   2   79.95    1.87 
   1  -3  -2   80.41    1.94 
   1  -3  -2   76.69    1.92 
  -1  -3  -2   82.36    1.89 
  -1  -3  -2   81.53    1.92 
  -1  -3  -2   81.86    1.89 
  -1   3   2   80.00    1.94 
  -1   3   2   81.42    1.91 
  -1   3   2   82.64    1.92 
  -1   3   2   83.56    1.90 
   1   4   2   10.22    0.29 
   1  -4  -2   10.29    0.30 
   1  -4  -2   10.63    0.26 
   1   4   2   10.73    0.28 
   1   4   2   10.91    0.26 
   1  -4  -2   10.54    0.34 
   1   4   2   10.10    0.31 
   1  -4  -2   10.34    0.31 
   1  -4  -2   10.01    0.26 
  -1   4   2   10.10    0.28 
  -1   4   2   10.68    0.27 
  -1   4   2   10.16    0.33 
  -1   4   2   10.49    0.29 
  -1  -4  -2   10.24    0.26 
  -1  -4  -2    9.73    0.31 
  -1   4   2    9.90    0.31 
   1   5   2   14.45    0.42 
   1   5   2   14.25    0.35 
   1   5   2   13.93    0.39 
   1  -5  -2   14.28    0.41 
   1  -5  -2   14.11    0.40 
  -1   5   2   14.67    0.38 
  -1   5   2   14.99    0.37 
  -1   5   2   14.75    0.42 
  -1   5   2   14.60    0.39 
  -1  -5  -2   14.64    0.36 
   1  -6  -2   12.15    0.36 
   1   6   2   12.84    0.30 
   1   6   2   12.17    0.39 
   1  -6  -2   12.95    0.38 
   1   6   2   12.55    0.36 
  -1  -6  -2   11.79    0.31 
  -1   6   2   12.23    0.38 
  -1   6   2   12.08    0.34 
  -1   6   2   12.17    0.34 
  -1   6   2   12.00    0.32 
  -1   6   2   11.83    0.41 
   1  -7  -2   39.87    1.03 
   1   7   2   39.78    1.05 
   1   7   2   39.18    1.02 
  -1   7   2   39.56    1.04 
  -1   7   2   40.03    0.97 
  -1   7   2   39.95    1.00 
  -1   7   2   40.91    0.98 
  -1   7   2   40.01    0.98 
  -1   7   2   40.29    1.08 
   1  -8  -2   59.77    1.50 
   1   8   2   59.98    1.54 
   1   8   2   59.91    1.50 
  -1   8   2   60.69    1.45 
  -1   8   2   59.82    1.52 
  -1   8   2   60.80    1.44 
  -1   8   2   57.43    1.56 
  -1   8   2   59.99    1.46 
  -1   8   2   61.39    1.45 
   1  -9  -2   32.93    0.87 
   1   9   2   31.42    0.87 
   1   9   2   30.55    0.91 
  -1   9   2   33.26    0.91 
  -1   9   2   32.36    0.81 
  -1   9   2   31.44    0.94 
  -1   9   2   32.53    0.82 
  -1   9   2   32.29    0.81 
  -1   9   2   32.92    0.83 
   1  10   2    1.71    0.20 
   1  10   2    2.00    0.23 
   1  10   2    1.76    0.15 
   1 -10  -2    1.82    0.17 
  -1  10   2    1.81    0.15 
  -1  10   2    1.54    0.20 
  -1  10   2    1.73    0.12 
  -1  10   2    1.41    0.17 
  -1  10   2    1.57    0.12 
   1  11   2   23.07    0.66 
   1 -11  -2   24.24    0.70 
   1  11   2   23.24    0.58 
   1  11   2   22.95    0.57 
   1  11   2   22.10    0.75 
   1  11   2   23.31    0.72 
  -1  11   2   23.85    0.62 
  -1  11   2   23.05    0.64 
  -1  11   2   22.79    0.78 
  -1  11   2   23.38    0.74 
  -1  11   2   23.60    0.63 
  -1  11   2   23.81    0.60 
   1  12   2    0.34    0.17 
   1  12   2    0.38    0.08 
   1  12   2    0.51    0.10 
   1  12   2    0.44    0.16 
   1  12   2    0.35    0.06 
  -1  12   2    0.52    0.10 
  -1  12   2    0.59    0.18 
  -1  12   2    0.52    0.08 
  -1  12   2    0.52    0.07 
  -1  12   2    0.19    0.20 
  -1  12   2    0.59    0.12 
   1  13   2    4.95    0.22 
   1  13   2    4.67    0.36 
   1  13   2    4.94    0.26 
   1  13   2    4.76    0.39 
   1  13   2    4.75    0.19 
  -1  13   2    4.63    0.25 
  -1  13   2    4.88    0.28 
  -1  13   2    4.70    0.18 
  -1  13   2    4.85    0.46 
  -1  13   2    4.65    0.17 
  -1  13   2    4.71    0.42 
   1  14   2    9.73    0.58 
   1  14   2   10.35    0.79 
   1  14   2   11.44    0.35 
   1  14   2   11.52    0.59 
   1  14   2   11.40    0.38 
  -1  14   2   11.11    0.41 
  -1  14   2   12.10    0.57 
  -1  14   2   11.45    0.44 
  -1  14   2   11.83    0.62 
   1  15   2    1.61    0.18 
   1  15   2    1.80    0.20 
   1  15   2    1.54    0.15 
   1  15   2    1.73    0.30 
   1  15   2    1.65    0.28 
  -1  15   2    1.80    0.22 
  -1  15   2    1.89    0.35 
  -1  15   2    2.33    0.32 
  -1  15   2    1.19    0.21 
   1  16   2    2.43    0.37 
   1  16   2    2.73    0.25 
   1  16   2    2.67    0.37 
  -1  16   2    3.20    0.43 
  -1  16   2    3.27    0.40 
   1  17   2    0.91    0.34 
   1  17   2    0.50    0.36 
   1  17   2    0.57    0.22 
  -1  17   2    0.31    0.36 
  -1  17   2    0.64    0.39 
  -1  17   2    0.61    0.22 
   2  17  -2    0.70    0.37 
  -2  17  -2   -0.15    0.37 
   2  16  -2    6.77    0.34 
   2  16  -2    6.44    0.62 
   2  16  -2    6.94    0.62 
  -2  16  -2    5.92    0.68 
  -2  16  -2    6.52    0.29 
  -2  16  -2    5.74    0.54 
  -2  16  -2    5.97    0.50 
  -2  16  -2    6.25    0.64 
   2  15  -2    0.78    0.26 
   2  15  -2    0.48    0.26 
   2  15  -2    0.65    0.13 
   2  15  -2    0.72    0.14 
  -2  15  -2    0.85    0.15 
  -2  15  -2    0.57    0.20 
  -2  15  -2    0.98    0.32 
  -2  15  -2    0.50    0.11 
  -2  15  -2    0.99    0.29 
  -2  15  -2    0.67    0.22 
   2  14  -2    4.61    0.21 
   2  14  -2    4.31    0.41 
   2  14  -2    4.32    0.43 
   2  14  -2    4.15    0.24 
  -2  14  -2    4.42    0.46 
  -2  14  -2    4.63    0.22 
  -2  14  -2    4.94    0.50 
  -2  14  -2    4.31    0.28 
  -2  14  -2    4.55    0.34 
  -2  14  -2    5.12    0.36 
   2  13  -2    2.84    0.15 
   2  13  -2    3.33    0.33 
   2  13  -2    3.02    0.19 
   2  13  -2    3.37    0.36 
  -2  13  -2    3.26    0.28 
  -2  13  -2    3.15    0.24 
  -2  13  -2    3.36    0.28 
  -2  13  -2    3.20    0.17 
  -2  13  -2    2.88    0.31 
   2  12  -2    3.88    0.19 
   2  12  -2    3.94    0.15 
   2  12  -2    4.00    0.35 
   2  12  -2    4.06    0.32 
  -2  12  -2    3.85    0.26 
  -2  12  -2    3.94    0.19 
  -2  12  -2    4.07    0.35 
  -2  12  -2    3.99    0.26 
  -2  12  -2    4.34    0.28 
   2  11  -2   21.91    0.55 
   2  11  -2   21.71    0.69 
   2  11  -2   22.19    0.59 
  -2  11  -2   19.64    0.72 
  -2  11  -2   22.51    0.66 
  -2  11  -2   22.97    0.75 
  -2  11  -2   22.14    0.60 
  -2  11  -2   22.27    0.64 
   2  10  -2   24.13    0.59 
   2  10  -2   24.07    0.62 
   2  10  -2   23.68    0.72 
  -2  10  -2   23.81    0.70 
  -2  10  -2   24.02    0.67 
  -2  10  -2   24.50    0.77 
  -2  10  -2   23.58    0.70 
  -2  10  -2   24.59    0.65 
   2   9  -2   27.14    0.65 
   2   9  -2   26.83    0.68 
   2   9  -2   26.03    0.76 
   2  -9   2   26.83    0.77 
  -2   9  -2   27.46    0.76 
  -2   9  -2   26.15    0.71 
  -2   9  -2   26.93    0.72 
  -2   9  -2   27.00    0.81 
  -2   9  -2   27.47    0.75 
   2   8  -2   29.77    0.74 
   2   8  -2   28.93    0.81 
   2   8  -2   29.50    0.71 
   2   8  -2   30.31    0.72 
  -2  -8   2   29.96    0.72 
  -2   8  -2   29.35    0.78 
  -2   8  -2   30.24    0.81 
  -2   8  -2   30.11    0.85 
  -2   8  -2   29.90    0.78 
   2  -7   2   68.42    1.74 
   2  -7   2   68.10    1.64 
   2   7  -2   70.27    1.66 
   2   7  -2   71.09    1.65 
   2  -7   2   71.26    1.74 
  -2   7  -2   71.11    1.77 
  -2   7  -2   70.10    1.72 
  -2   7  -2   70.79    1.70 
  -2   7  -2   69.81    1.71 
  -2  -7   2   70.82    1.65 
   2   6  -2   20.28    0.51 
   2  -6   2   20.63    0.51 
   2  -6   2   20.08    0.52 
   2   6  -2   20.59    0.51 
   2  -6   2   20.95    0.58 
   2  -6   2   20.02    0.58 
  -2   6  -2   20.51    0.57 
  -2   6  -2   20.49    0.60 
  -2  -6   2   20.90    0.50 
  -2   6  -2   20.72    0.55 
  -2   6  -2   20.83    0.56 
   2   5  -2   24.43    0.64 
   2  -5   2   27.29    0.71 
   2  -5   2   26.90    0.65 
   2  -5   2   25.29    0.70 
   2   5  -2   27.12    0.65 
   2  -5   2   26.26    0.67 
   2   5  -2   27.55    0.64 
  -2  -5   2   27.53    0.64 
  -2   5  -2   27.49    0.70 
  -2   5  -2   26.51    0.68 
  -2   5  -2   26.42    0.69 
  -2   5  -2   25.25    0.72 
   2   4  -2   72.04    1.63 
   2  -4   2   66.72    1.68 
   2  -4   2   67.92    1.69 
   2  -4   2   69.70    1.66 
   2   4  -2   70.73    1.64 
   2  -4   2   70.76    1.64 
  -2   4  -2   65.60    1.69 
  -2   4  -2   67.94    1.67 
  -2   4  -2   72.79    1.68 
  -2   4  -2   68.64    1.66 
   2  -3   2   33.74    0.84 
   2  -3   2   32.45    0.83 
   2  -3   2   30.99    0.84 
   2  -3   2   32.76    0.82 
   2   3  -2   33.33    0.81 
   2   3  -2   34.01    0.79 
   2  -3   2   33.03    0.85 
   2   3  -2   34.65    0.80 
  -2   3  -2   33.25    0.84 
  -2   3  -2   34.66    0.85 
  -2  -3   2   34.38    0.79 
  -2   3  -2   33.39    0.83 
  -2   3  -2   34.13    0.83 
   2   2  -2   45.57    1.07 
   2   2  -2   44.17    1.07 
   2  -2   2   42.68    1.10 
   2   2  -2   46.56    1.06 
   2  -2   2   46.20    1.09 
   2  -2   2   47.17    1.09 
   2   2  -2   45.48    1.05 
   2  -2   2   43.70    1.08 
  -2   2  -2   42.41    1.09 
  -2   2  -2   46.23    1.09 
  -2   2  -2   40.52    1.09 
  -2  -2   2   45.87    1.07 
  -2   2  -2   42.52    1.08 
  -2  -2   2   45.06    1.05 
  -2  -2   2   45.35    1.06 
   2   1  -2  315.35    7.12 
   2   1  -2  302.38    7.14 
   2  -1   2  306.61    7.22 
   2   1  -2  326.30    7.24 
   2  -1   2  299.06    7.15 
   2  -1   2  290.61    7.12 
   2  -1   2  316.44    7.19 
  -2  -1   2  308.82    7.13 
  -2   1  -2  305.34    7.18 
  -2   1  -2  307.04    7.18 
  -2  -1   2  263.79    7.15 
  -2  -1   2  291.21    7.25 
  -2  -1   2  307.58    7.13 
  -2   1  -2  300.34    7.14 
   2   0  -2  147.20    3.56 
   2   0   2  145.80    3.52 
   2   0   2  154.10    3.59 
   2   0  -2  154.00    3.60 
   2   0   2  151.75    3.58 
   2   0  -2  153.39    3.61 
   2   0  -2  154.26    3.60 
   2   0   2  154.79    3.60 
  -2   0  -2  149.87    3.57 
  -2   0  -2  151.18    3.59 
  -2   0   2  152.37    3.56 
  -2   0   2  152.92    3.56 
  -2   0  -2  135.97    3.52 
  -2   0  -2  148.90    3.55 
  -2   0  -2  154.61    3.59 
  -2   0   2  153.55    3.61 
   2  -1  -2  295.71    7.22 
   2   1   2  320.14    7.33 
   2   1   2  314.24    7.24 
   2   1   2  319.27    7.18 
   2  -1  -2  300.62    7.27 
   2  -1  -2  292.51    7.22 
   2   1   2  307.48    7.23 
   2  -1  -2  313.42    7.31 
   2   1   2  293.37    7.25 
  -2   1   2  317.17    7.32 
  -2   1   2  302.61    7.30 
  -2   1   2  314.21    7.33 
  -2  -1  -2  307.14    7.24 
  -2  -1  -2  319.33    7.17 
  -2   1   2  317.06    7.33 
  -2  -1  -2  307.84    7.23 
  -2  -1  -2  275.61    7.23 
  -2  -1  -2  313.70    7.23 
   2   2   2   44.84    1.06 
   2  -2  -2   45.04    1.09 
   2   2   2   42.14    1.07 
   2   2   2   44.28    1.07 
   2   2   2   45.64    1.06 
   2  -2  -2   43.90    1.07 
   2  -2  -2   44.92    1.10 
   2   2   2   45.92    1.04 
   2  -2  -2   46.12    1.10 
  -2   2   2   43.89    1.09 
  -2   2   2   46.57    1.08 
  -2   2   2   45.65    1.09 
  -2  -2  -2   43.06    1.07 
  -2  -2  -2   45.71    1.07 
  -2  -2  -2   45.70    1.06 
  -2   2   2   41.44    1.09 
   2  -3  -2   33.53    0.83 
   2  -3  -2   33.63    0.87 
   2  -3  -2   34.11    0.85 
   2   3   2   33.16    0.82 
   2   3   2   35.65    0.80 
   2  -3  -2   34.33    0.82 
   2   3   2   34.96    0.82 
   2  -3  -2   31.86    0.85 
   2   3   2   34.27    0.81 
  -2  -3  -2   32.73    0.82 
  -2   3   2   31.56    0.85 
  -2  -3  -2   34.20    0.83 
  -2   3   2   33.37    0.86 
  -2  -3  -2   34.36    0.80 
  -2   3   2   33.50    0.85 
  -2   3   2   33.16    0.83 
   2   4   2   68.61    1.68 
   2   4   2   70.45    1.65 
   2  -4  -2   68.74    1.71 
   2   4   2   68.83    1.68 
   2   4   2   70.83    1.66 
   2  -4  -2   69.78    1.66 
   2  -4  -2   71.28    1.71 
   2  -4  -2   69.88    1.68 
  -2  -4  -2   71.13    1.64 
  -2   4   2   71.48    1.71 
  -2   4   2   72.33    1.73 
  -2   4   2   71.70    1.68 
  -2  -4  -2   69.90    1.69 
  -2   4   2   71.71    1.70 
   2   5   2   27.18    0.63 
   2   5   2   26.25    0.69 
   2  -5  -2   25.17    0.70 
   2  -5  -2   26.88    0.65 
   2   5   2   27.16    0.66 
   2  -5  -2   26.15    0.71 
   2   5   2   25.72    0.67 
   2  -5  -2   26.89    0.64 
  -2   5   2   26.99    0.71 
  -2   5   2   25.65    0.68 
  -2   5   2   26.68    0.67 
  -2  -5  -2   26.87    0.63 
  -2   5   2   26.47    0.74 
  -2   5   2   26.57    0.69 
   2  -6  -2   20.97    0.50 
   2  -6  -2   20.28    0.57 
   2  -6  -2   21.71    0.51 
   2   6   2   20.71    0.57 
   2   6   2   21.02    0.54 
   2  -6  -2   20.17    0.58 
   2   6   2   20.90    0.54 
  -2   6   2   20.19    0.55 
  -2   6   2   18.98    0.61 
  -2   6   2   20.41    0.59 
  -2   6   2   20.54    0.54 
  -2   6   2   20.12    0.56 
   2   7   2   71.12    1.69 
   2  -7  -2   69.81    1.73 
   2   7   2   71.21    1.73 
   2   7   2   70.88    1.69 
  -2   7   2   69.42    1.69 
  -2   7   2   65.55    1.73 
  -2   7   2   69.17    1.71 
  -2   7   2   71.57    1.68 
  -2   7   2   66.58    1.77 
  -2   7   2   70.88    1.70 
   2   8   2   29.40    0.82 
   2  -8  -2   29.33    0.82 
   2   8   2   29.95    0.79 
   2   8   2   29.75    0.77 
  -2   8   2   29.59    0.79 
  -2   8   2   30.45    0.88 
  -2   8   2   29.94    0.78 
  -2   8   2   29.83    0.77 
  -2   8   2   30.23    0.78 
  -2   8   2   28.72    0.83 
   2   9   2   27.08    0.71 
   2   9   2   26.66    0.77 
   2   9   2   26.91    0.74 
  -2   9   2   26.01    0.71 
  -2   9   2   26.61    0.70 
  -2   9   2   25.97    0.72 
  -2   9   2   26.94    0.71 
  -2   9   2   25.72    0.78 
  -2   9   2   25.89    0.82 
   2  10   2   24.01    0.74 
   2  10   2   23.26    0.70 
   2  10   2   23.51    0.66 
   2 -10  -2   24.71    0.72 
  -2  10   2   24.29    0.67 
  -2  10   2   24.61    0.79 
  -2  10   2   24.17    0.67 
  -2  10   2   23.45    0.74 
  -2  10   2   24.01    0.65 
  -2  10   2   23.89    0.65 
   2  11   2   22.64    0.69 
   2  11   2   22.13    0.64 
   2 -11  -2   22.34    0.70 
   2  11   2   22.88    0.73 
  -2  11   2   22.53    0.64 
  -2  11   2   23.63    0.79 
  -2  11   2   23.30    0.75 
  -2  11   2   22.75    0.64 
  -2  11   2   22.49    0.62 
  -2  11   2   22.51    0.65 
   2  12   2    3.98    0.23 
   2  12   2    4.26    0.34 
   2 -12  -2    3.90    0.28 
   2  12   2    4.10    0.30 
  -2  12   2    4.51    0.35 
  -2  12   2    3.78    0.24 
  -2  12   2    3.85    0.20 
  -2  12   2    4.09    0.26 
  -2  12   2    3.61    0.36 
  -2  12   2    4.04    0.22 
   2  13   2    3.41    0.35 
   2  13   2    2.71    0.31 
   2  13   2    3.46    0.23 
  -2  13   2    3.23    0.18 
  -2  13   2    3.47    0.36 
  -2  13   2    3.26    0.39 
  -2  13   2    3.11    0.21 
  -2  13   2    2.97    0.28 
  -2  13   2    3.15    0.25 
   2  14   2    4.67    0.41 
   2  14   2    3.70    0.38 
   2  14   2    4.72    0.21 
   2  14   2    4.18    0.29 
   2  14   2    4.10    0.17 
  -2  14   2    4.41    0.35 
  -2  14   2    5.42    0.49 
  -2  14   2    3.82    0.43 
  -2  14   2    4.50    0.23 
  -2  14   2    4.28    0.30 
  -2  14   2    4.72    0.21 
   2  15   2    0.97    0.25 
   2  15   2    0.63    0.13 
   2  15   2    0.73    0.11 
   2  15   2    0.28    0.24 
   2  15   2    0.70    0.16 
  -2  15   2    0.66    0.10 
  -2  15   2    0.74    0.31 
  -2  15   2    0.58    0.22 
  -2  15   2    0.52    0.19 
  -2  15   2    0.42    0.26 
   2  16   2    6.60    0.58 
   2  16   2    6.10    0.57 
   2  16   2    6.03    0.38 
  -2  16   2    5.87    0.60 
  -2  16   2    5.96    0.66 
  -2  17   2    0.36    0.39 
   3  16  -2    0.11    0.15 
   3  16  -2    0.35    0.31 
   3  16  -2    0.16    0.30 
  -3  16  -2    0.13    0.35 
  -3  16  -2    0.39    0.28 
  -3  16  -2    0.05    0.37 
  -3  16  -2    0.06    0.27 
  -3  16  -2    0.29    0.17 
   3  15  -2    1.91    0.18 
   3  15  -2    1.54    0.29 
   3  15  -2    1.75    0.18 
   3  15  -2    1.56    0.29 
  -3  15  -2    1.59    0.23 
  -3  15  -2    1.85    0.21 
  -3  15  -2    1.51    0.33 
  -3  15  -2    1.50    0.26 
  -3  15  -2    1.36    0.35 
   3  14  -2   10.48    0.37 
   3  14  -2    9.11    0.61 
   3  14  -2   10.22    0.54 
   3  14  -2   10.32    0.31 
  -3  14  -2   10.50    0.49 
  -3  14  -2   10.06    0.36 
  -3  14  -2   10.32    0.50 
  -3  14  -2   10.43    0.64 
  -3  14  -2   10.89    0.59 
  -3  14  -2    9.73    0.43 
   3  13  -2    4.09    0.16 
   3  13  -2    4.23    0.21 
   3  13  -2    4.25    0.36 
   3  13  -2    4.01    0.38 
  -3  13  -2    3.98    0.33 
  -3  13  -2    3.89    0.22 
  -3  13  -2    3.32    0.29 
  -3  13  -2    3.77    0.32 
  -3  13  -2    3.95    0.39 
   3  12  -2    2.73    0.29 
   3  12  -2    2.89    0.31 
   3  12  -2    2.87    0.17 
   3  12  -2    2.91    0.13 
  -3  12  -2    2.89    0.27 
  -3  12  -2    2.52    0.19 
  -3  12  -2    2.60    0.27 
  -3  12  -2    2.41    0.25 
  -3  12  -2    1.93    0.24 
   3  11  -2   49.97    1.34 
   3  11  -2   48.87    1.20 
   3 -11   2   45.91    1.31 
   3  11  -2   49.60    1.31 
   3  11  -2   50.54    1.16 
  -3  11  -2   48.39    1.25 
  -3  11  -2   47.75    1.52 
  -3  11  -2   48.13    1.30 
  -3  11  -2   49.09    1.28 
  -3  11  -2   49.50    1.31 
   3  10  -2    2.71    0.10 
   3 -10   2    2.31    0.22 
   3  10  -2    2.73    0.21 
   3  10  -2    2.52    0.14 
  -3  10  -2    2.56    0.27 
  -3  10  -2    2.49    0.23 
  -3  10  -2    2.49    0.24 
  -3  10  -2    2.38    0.17 
  -3  10  -2    2.51    0.21 
   3   9  -2   39.83    0.94 
   3   9  -2   39.95    0.97 
   3   9  -2   39.60    1.05 
   3  -9   2   41.39    1.08 
  -3   9  -2   40.22    1.03 
  -3   9  -2   38.56    1.06 
  -3   9  -2   38.66    1.07 
  -3   9  -2   37.44    1.10 
  -3   9  -2   39.35    1.04 
   3  -8   2    3.83    0.14 
   3   8  -2    3.85    0.13 
   3   8  -2    3.78    0.12 
   3  -8   2    3.80    0.13 
   3   8  -2    3.96    0.15 
   3  -8   2    3.72    0.23 
   3  -8   2    3.77    0.22 
  -3   8  -2    3.70    0.20 
  -3   8  -2    3.64    0.19 
  -3   8  -2    3.84    0.25 
  -3  -8   2    3.75    0.12 
  -3   8  -2    3.70    0.23 
  -3   8  -2    3.71    0.21 
   3  -7   2   22.46    0.56 
   3   7  -2   21.89    0.56 
   3  -7   2   22.27    0.65 
   3   7  -2   22.19    0.54 
   3   7  -2   22.49    0.56 
   3  -7   2   22.13    0.57 
   3  -7   2   22.37    0.65 
  -3   7  -2   22.02    0.62 
  -3  -7   2   22.76    0.54 
  -3   7  -2   21.26    0.67 
  -3   7  -2   22.66    0.64 
  -3   7  -2   22.32    0.62 
   3   6  -2   23.17    0.57 
   3  -6   2   22.14    0.65 
   3  -6   2   22.25    0.60 
   3   6  -2   23.61    0.58 
   3  -6   2   22.77    0.59 
   3  -6   2   23.30    0.67 
   3   6  -2   23.33    0.58 
  -3  -6   2   23.80    0.56 
  -3   6  -2   21.66    0.67 
  -3   6  -2   23.06    0.64 
  -3   6  -2   23.82    0.63 
  -3   6  -2   23.60    0.64 
   3  -5   2  142.45    3.36 
   3  -5   2  143.38    3.34 
   3  -5   2  148.41    3.40 
   3   5  -2  143.67    3.32 
   3   5  -2  143.41    3.34 
   3  -5   2  139.53    3.40 
   3   5  -2  142.89    3.32 
  -3   5  -2  139.27    3.38 
  -3   5  -2  140.99    3.39 
  -3   5  -2  138.82    3.41 
  -3   5  -2  143.59    3.38 
   3   4  -2   17.43    0.47 
   3  -4   2   18.38    0.51 
   3   4  -2   17.98    0.46 
   3  -4   2   17.43    0.49 
   3  -4   2   18.43    0.48 
   3  -4   2   18.30    0.53 
   3   4  -2   18.22    0.45 
  -3   4  -2   17.92    0.50 
  -3   4  -2   17.41    0.51 
  -3   4  -2   17.28    0.52 
  -3   4  -2   18.07    0.50 
  -3  -4   2   18.12    0.44 
   3  -3   2   19.42    0.55 
   3  -3   2   19.02    0.51 
   3  -3   2   19.58    0.53 
   3   3  -2   20.51    0.48 
   3  -3   2   19.46    0.52 
   3   3  -2   20.12    0.49 
   3  -3   2   20.08    0.54 
   3   3  -2   20.10    0.50 
   3   3  -2   19.94    0.51 
  -3  -3   2   19.30    0.50 
  -3   3  -2   19.43    0.54 
  -3  -3   2   18.94    0.48 
  -3   3  -2   19.27    0.54 
  -3   3  -2   18.54    0.53 
  -3   3  -2   18.21    0.52 
   3   2  -2   52.60    1.19 
   3  -2   2   52.82    1.24 
   3  -2   2   50.70    1.26 
   3   2  -2   52.94    1.21 
   3  -2   2   50.49    1.24 
   3   2  -2   51.31    1.22 
   3   2  -2   49.32    1.23 
   3  -2   2   48.50    1.23 
  -3   2  -2   51.26    1.25 
  -3   2  -2   49.79    1.24 
  -3  -2   2   52.21    1.21 
  -3   2  -2   49.82    1.24 
  -3   2  -2   49.48    1.24 
  -3  -2   2   44.79    1.24 
  -3  -2   2   50.52    1.20 
   3   1  -2   37.15    0.89 
   3   1  -2   36.47    0.90 
   3  -1   2   35.90    0.91 
   3  -1   2   33.47    0.90 
   3  -1   2   38.13    0.93 
   3  -1   2   35.66    0.90 
   3   1  -2   38.55    0.87 
   3   1  -2   36.58    0.90 
   3   1  -2   38.15    0.92 
  -3   1  -2   36.93    0.92 
  -3   1  -2   34.93    0.91 
  -3  -1   2   36.85    0.91 
  -3   1  -2   35.58    0.91 
  -3   1  -2   36.90    0.90 
  -3  -1   2   36.21    0.90 
  -3  -1   2   36.15    0.89 
  -3  -1   2   37.10    0.87 
   3   0  -2  131.66    3.08 
   3   0   2  130.17    3.06 
   3   0  -2  131.51    3.05 
   3   0  -2  132.98    3.04 
   3   0   2  124.71    3.06 
   3   0   2  131.66    3.08 
   3   0  -2  132.83    3.06 
   3   0   2  132.64    3.04 
  -3   0  -2  125.19    3.05 
  -3   0   2  126.71    3.05 
  -3   0   2  129.02    3.06 
  -3   0  -2  129.94    3.04 
  -3   0   2  132.50    3.06 
  -3   0  -2  127.79    3.06 
  -3   0  -2  128.74    3.07 
  -3   0   2  130.19    3.07 
  -3   0   2  129.95    3.07 
   3   1   2   35.86    0.90 
   3  -1  -2   38.17    0.91 
   3   1   2   34.16    0.91 
   3   1   2   37.03    0.88 
   3  -1  -2   35.66    0.91 
   3   1   2   36.10    0.90 
   3  -1  -2   35.19    0.90 
   3  -1  -2   34.71    0.92 
  -3   1   2   36.71    0.91 
  -3   1   2   36.32    0.90 
  -3   1   2   36.97    0.92 
  -3  -1  -2   37.15    0.89 
  -3  -1  -2   37.34    0.87 
  -3   1   2   37.43    0.91 
  -3  -1  -2   37.02    0.91 
  -3  -1  -2   38.24    0.90 
  -3   1   2   34.45    0.91 
  -3  -1  -2   37.27    0.87 
   3  -2  -2   50.49    1.25 
   3   2   2   53.11    1.22 
   3   2   2   51.55    1.25 
   3  -2  -2   50.99    1.27 
   3   2   2   51.31    1.25 
   3  -2  -2   52.82    1.28 
   3   2   2   51.87    1.24 
   3   2   2   51.90    1.22 
  -3   2   2   51.24    1.26 
  -3  -2  -2   52.42    1.22 
  -3  -2  -2   51.18    1.24 
  -3   2   2   51.14    1.27 
  -3  -2  -2   51.27    1.24 
  -3   2   2   49.95    1.26 
   3  -3  -2   19.11    0.50 
   3  -3  -2   18.57    0.53 
   3  -3  -2   18.56    0.52 
   3   3   2   19.50    0.50 
   3   3   2   18.90    0.51 
   3   3   2   19.28    0.49 
   3  -3  -2   19.23    0.54 
   3   3   2   19.55    0.48 
  -3   3   2   18.20    0.53 
  -3  -3  -2   19.85    0.49 
  -3   3   2   18.59    0.54 
  -3  -3  -2   20.29    0.50 
  -3   3   2   19.00    0.53 
  -3   3   2   20.07    0.52 
  -3  -3  -2   20.13    0.49 
   3  -4  -2   17.79    0.48 
   3  -4  -2   17.87    0.51 
   3   4   2   17.40    0.46 
   3  -4  -2   17.25    0.46 
   3  -4  -2   17.74    0.51 
   3   4   2   17.73    0.47 
   3   4   2   17.56    0.45 
  -3  -4  -2   17.84    0.46 
  -3  -4  -2   17.10    0.46 
  -3   4   2   17.09    0.52 
  -3   4   2   18.25    0.51 
  -3   4   2   17.95    0.48 
  -3   4   2   16.77    0.50 
  -3  -4  -2   17.66    0.44 
   3   5   2  142.97    3.33 
   3  -5  -2  142.39    3.35 
   3   5   2  142.07    3.36 
   3  -5  -2  141.41    3.36 
   3  -5  -2  143.50    3.41 
   3  -5  -2  140.00    3.41 
   3   5   2  144.03    3.36 
  -3   5   2  146.08    3.44 
  -3  -5  -2  138.17    3.36 
  -3   5   2  145.07    3.38 
  -3   5   2  146.53    3.38 
  -3  -5  -2  145.17    3.33 
  -3   5   2  139.32    3.41 
  -3   5   2  142.72    3.40 
   3  -6  -2   23.81    0.60 
   3   6   2   23.03    0.62 
   3   6   2   23.65    0.60 
   3  -6  -2   24.36    0.67 
   3  -6  -2   23.81    0.59 
   3   6   2   23.40    0.62 
   3  -6  -2   24.64    0.67 
  -3  -6  -2   22.88    0.56 
  -3   6   2   23.30    0.65 
  -3   6   2   22.91    0.67 
  -3   6   2   22.79    0.64 
  -3   6   2   23.86    0.70 
  -3   6   2   23.14    0.63 
  -3   6   2   22.79    0.66 
   3   7   2   22.42    0.59 
   3  -7  -2   22.13    0.56 
   3   7   2   22.81    0.62 
   3  -7  -2   22.35    0.65 
   3   7   2   21.98    0.59 
   3  -7  -2   21.96    0.55 
  -3   7   2   21.80    0.63 
  -3   7   2   21.34    0.62 
  -3   7   2   21.40    0.64 
  -3   7   2   22.69    0.69 
  -3   7   2   22.55    0.61 
  -3   7   2   22.55    0.66 
   3   8   2    4.06    0.19 
   3   8   2    3.74    0.18 
   3  -8  -2    3.71    0.11 
   3  -8  -2    3.62    0.23 
   3   8   2    3.62    0.20 
  -3   8   2    3.71    0.21 
  -3   8   2    3.64    0.26 
  -3   8   2    3.66    0.21 
  -3   8   2    3.98    0.25 
  -3   8   2    3.90    0.21 
  -3   8   2    3.76    0.19 
   3   9   2   39.00    1.02 
   3   9   2   38.20    1.00 
   3   9   2   38.37    1.04 
   3  -9  -2   39.63    1.07 
  -3   9   2   40.73    1.04 
  -3   9   2   39.40    1.04 
  -3   9   2   39.04    1.03 
  -3   9   2   39.40    1.09 
  -3   9   2   39.33    1.02 
  -3   9   2   38.83    1.13 
   3  10   2    2.41    0.17 
   3  10   2    2.57    0.22 
   3 -10  -2    2.57    0.23 
   3  10   2    2.49    0.20 
  -3  10   2    2.74    0.20 
  -3  10   2    2.41    0.21 
  -3  10   2    2.55    0.29 
  -3  10   2    2.82    0.26 
  -3  10   2    2.68    0.20 
  -3  10   2    2.53    0.19 
   3 -11  -2   50.47    1.33 
   3  11   2   50.16    1.29 
   3  11   2   49.22    1.25 
   3  11   2   49.83    1.32 
  -3  11   2   49.44    1.26 
  -3  11   2   49.18    1.26 
  -3  11   2   49.57    1.36 
  -3  11   2   41.08    1.48 
  -3  11   2   48.88    1.27 
  -3  11   2   49.54    1.28 
   3  12   2    2.34    0.28 
   3  12   2    3.20    0.28 
   3  12   2    2.39    0.20 
  -3  12   2    2.73    0.21 
  -3  12   2    2.79    0.21 
  -3  12   2    2.54    0.26 
  -3  12   2    2.32    0.33 
  -3  12   2    2.96    0.37 
  -3  12   2    2.22    0.23 
   3  13   2    3.59    0.25 
   3  13   2    3.83    0.34 
   3  13   2    4.02    0.33 
  -3  13   2    4.17    0.32 
  -3  13   2    4.07    0.24 
  -3  13   2    3.87    0.38 
  -3  13   2    3.72    0.29 
  -3  13   2    4.26    0.44 
  -3  13   2    3.56    0.24 
   3  14   2   10.25    0.52 
   3 -14  -2    9.98    0.51 
   3  14   2   10.12    0.42 
   3  14   2   10.72    0.52 
  -3  14   2   10.53    0.38 
  -3  14   2   10.81    0.48 
  -3  14   2    9.91    0.57 
  -3  14   2   10.16    0.45 
  -3  14   2   10.23    0.63 
   3  15   2    2.23    0.22 
   3  15   2    1.97    0.29 
   3  15   2    1.94    0.29 
  -3  15   2    2.08    0.24 
  -3  15   2    2.23    0.25 
  -3  15   2    2.38    0.38 
  -3  15   2    1.78    0.22 
  -3  15   2    1.64    0.32 
   3  16   2    0.24    0.26 
   3  16   2    0.17    0.17 
   3  16   2    0.75    0.29 
  -3  16   2    0.25    0.12 
  -3  16   2    0.28    0.32 
  -3  16   2    0.70    0.35 
   4  16  -2    3.21    0.39 
   4  16  -2    2.38    0.36 
  -4  16  -2    3.04    0.49 
  -4  16  -2    3.40    0.38 
  -4  16  -2    3.17    0.45 
  -4  16  -2    3.51    0.39 
   4  15  -2    2.55    0.26 
   4  15  -2    2.13    0.18 
   4  15  -2    2.79    0.34 
   4  15  -2    2.34    0.32 
  -4  15  -2    2.32    0.30 
  -4  15  -2    2.53    0.32 
  -4  15  -2    1.82    0.39 
  -4  15  -2    2.42    0.26 
  -4  15  -2    2.39    0.37 
   4  14  -2    7.47    0.25 
   4  14  -2    7.17    0.47 
   4  14  -2    8.11    0.49 
   4  14  -2    7.53    0.32 
  -4  14  -2    7.75    0.46 
  -4  14  -2    8.40    0.44 
  -4  14  -2    7.38    0.56 
  -4  14  -2    7.78    0.35 
  -4  14  -2    7.44    0.48 
  -4  14  -2    8.04    0.60 
   4  13  -2    1.03    0.09 
   4  13  -2    0.82    0.21 
   4  13  -2    0.97    0.20 
   4  13  -2    1.12    0.13 
  -4  13  -2    1.01    0.27 
  -4  13  -2    1.39    0.16 
  -4  13  -2    1.25    0.20 
  -4  13  -2    1.26    0.21 
  -4  13  -2    0.87    0.25 
  -4  13  -2    1.28    0.21 
   4  12  -2    6.74    0.37 
   4  12  -2    6.32    0.25 
   4  12  -2    6.56    0.38 
   4  12  -2    6.49    0.21 
   4 -12   2    6.43    0.38 
  -4  12  -2    6.82    0.38 
  -4  12  -2    6.72    0.38 
  -4  12  -2    6.12    0.38 
  -4  12  -2    6.03    0.30 
  -4  12  -2    6.34    0.44 
   4  11  -2   20.24    0.51 
   4  11  -2   19.87    0.64 
   4  11  -2   20.26    0.55 
   4  11  -2   20.12    0.66 
  -4  11  -2   20.14    0.66 
  -4  11  -2   19.94    0.65 
  -4  11  -2   19.94    0.72 
  -4  11  -2   19.66    0.68 
  -4  11  -2   19.21    0.61 
   4  10  -2    6.56    0.32 
   4  10  -2    6.62    0.24 
   4  10  -2    6.52    0.21 
   4  10  -2    6.98    0.31 
   4 -10   2    6.48    0.33 
  -4  10  -2    6.42    0.32 
  -4  10  -2    6.85    0.35 
  -4  10  -2    6.83    0.30 
  -4  10  -2    6.74    0.38 
  -4  10  -2    6.54    0.32 
   4  -9   2    5.19    0.28 
   4  -9   2    4.95    0.17 
   4   9  -2    5.09    0.19 
   4   9  -2    5.11    0.17 
   4  -9   2    5.13    0.18 
  -4   9  -2    4.94    0.27 
  -4   9  -2    4.89    0.30 
  -4   9  -2    5.32    0.27 
  -4   9  -2    5.53    0.33 
  -4   9  -2    5.01    0.25 
   4   8  -2    2.58    0.12 
   4  -8   2    2.50    0.15 
   4   8  -2    2.52    0.13 
   4  -8   2    2.53    0.13 
   4  -8   2    2.53    0.21 
   4   8  -2    2.69    0.12 
  -4  -8   2    2.48    0.09 
  -4   8  -2    2.48    0.23 
  -4   8  -2    2.64    0.20 
  -4   8  -2    2.46    0.19 
  -4   8  -2    2.12    0.18 
  -4   8  -2    2.37    0.22 
   4  -7   2    9.72    0.36 
   4  -7   2    9.10    0.37 
   4   7  -2    9.38    0.28 
   4  -7   2    9.12    0.30 
   4  -7   2    9.06    0.28 
   4   7  -2    8.17    0.31 
   4   7  -2    9.41    0.27 
  -4   7  -2    9.18    0.38 
  -4   7  -2    9.18    0.34 
  -4  -7   2    9.62    0.25 
  -4   7  -2    9.68    0.35 
  -4   7  -2    9.08    0.34 
   4  -6   2   22.58    0.59 
   4  -6   2   22.81    0.61 
   4  -6   2   23.21    0.67 
   4   6  -2   21.63    0.57 
   4   6  -2   22.24    0.57 
   4   6  -2   22.26    0.58 
   4  -6   2   22.36    0.65 
  -4  -6   2   22.01    0.56 
  -4   6  -2   21.48    0.64 
  -4   6  -2   21.06    0.66 
  -4   6  -2   22.18    0.64 
  -4   6  -2   23.20    0.64 
   4  -5   2   11.93    0.39 
   4   5  -2   12.11    0.33 
   4  -5   2   12.20    0.36 
   4   5  -2   12.05    0.33 
   4   5  -2   11.88    0.35 
   4  -5   2   11.33    0.41 
   4  -5   2   12.11    0.37 
  -4   5  -2   11.86    0.39 
  -4   5  -2   11.95    0.40 
  -4  -5   2   12.27    0.32 
  -4   5  -2   11.63    0.41 
  -4   5  -2   11.37    0.38 
   4  -4   2    1.99    0.14 
   4  -4   2    2.09    0.14 
   4  -4   2    1.85    0.17 
   4  -4   2    1.87    0.14 
   4   4  -2    1.87    0.11 
   4   4  -2    1.92    0.11 
   4  -4   2    1.84    0.12 
   4   4  -2    1.96    0.08 
   4   4  -2    1.92    0.10 
  -4   4  -2    1.98    0.13 
  -4  -4   2    2.02    0.09 
  -4   4  -2    1.96    0.14 
  -4  -4   2    1.76    0.10 
  -4   4  -2    1.89    0.14 
  -4   4  -2    1.98    0.15 
   4  -3   2   20.01    0.56 
   4   3  -2   20.03    0.47 
   4  -3   2   19.31    0.55 
   4  -3   2   18.88    0.54 
   4  -3   2   19.26    0.58 
   4   3  -2   20.05    0.51 
   4   3  -2   18.95    0.53 
   4  -3   2   19.82    0.54 
   4   3  -2   19.69    0.52 
  -4   3  -2   19.82    0.56 
  -4  -3   2   18.09    0.55 
  -4   3  -2   19.17    0.55 
  -4   3  -2   19.96    0.55 
  -4   3  -2   20.49    0.57 
  -4  -3   2   19.46    0.50 
   4   2  -2   89.16    1.97 
   4  -2   2   89.56    2.04 
   4  -2   2   89.76    2.05 
   4  -2   2   82.29    2.04 
   4  -2   2   81.77    2.03 
   4   2  -2   87.67    2.01 
   4   2  -2   86.13    2.02 
   4   2  -2   86.01    2.04 
   4  -2   2   84.88    2.07 
  -4   2  -2   83.68    2.04 
  -4  -2   2   82.50    2.03 
  -4  -2   2   75.36    1.97 
  -4   2  -2   81.48    2.05 
  -4   2  -2   80.46    2.04 
  -4  -2   2   85.10    2.01 
  -4   2  -2   85.40    2.04 
  -4  -2   2   84.87    2.01 
   4  -1   2    6.35    0.25 
   4   1  -2    6.63    0.22 
   4   1  -2    6.72    0.19 
   4   1  -2    6.51    0.24 
   4  -1   2    6.35    0.23 
   4  -1   2    6.79    0.24 
   4  -1   2    6.64    0.22 
   4   1  -2    6.73    0.23 
   4   1  -2    6.71    0.22 
  -4  -1   2    6.48    0.18 
  -4   1  -2    6.27    0.22 
  -4  -1   2    6.29    0.21 
  -4   1  -2    6.30    0.23 
  -4  -1   2    6.55    0.22 
  -4   1  -2    6.97    0.24 
  -4  -1   2    6.48    0.23 
   4   0   2    0.09    0.05 
   4   0  -2    0.07    0.05 
   4   0  -2    0.10    0.04 
   4   0   2    0.18    0.04 
   4   0  -2    0.16    0.04 
   4   0  -2    0.08    0.04 
   4   0   2    0.11    0.05 
   4   0   2    0.22    0.05 
  -4   0  -2    0.15    0.05 
  -4   0   2    0.25    0.05 
  -4   0  -2    0.18    0.04 
  -4   0   2    0.12    0.06 
  -4   0  -2    0.11    0.05 
  -4   0   2    0.13    0.03 
  -4   0  -2    0.12    0.04 
  -4   0   2    0.04    0.03 
   4   1   2    6.40    0.20 
   4  -1  -2    6.31    0.24 
   4  -1  -2    5.75    0.22 
   4   1   2    6.14    0.23 
   4   1   2    6.46    0.22 
   4  -1  -2    6.90    0.24 
  -4  -1  -2    6.34    0.21 
  -4  -1  -2    6.35    0.18 
  -4   1   2    6.42    0.24 
  -4  -1  -2    6.44    0.20 
  -4   1   2    6.05    0.22 
  -4   1   2    6.62    0.21 
  -4   1   2    6.68    0.23 
  -4  -1  -2    5.99    0.21 
  -4  -1  -2    6.52    0.23 
   4   2   2   83.53    2.03 
   4   2   2   84.60    2.02 
   4  -2  -2   82.57    2.07 
   4  -2  -2   83.39    2.04 
   4  -2  -2   84.08    2.05 
   4   2   2   83.79    2.04 
   4  -2  -2   81.05    2.03 
   4   2   2   85.65    2.00 
  -4   2   2   88.37    2.05 
  -4  -2  -2   86.88    1.98 
  -4   2   2   86.74    2.07 
  -4   2   2   86.47    2.04 
  -4  -2  -2   86.27    2.03 
  -4   2   2   84.22    2.05 
  -4   2   2   82.69    2.05 
  -4  -2  -2   84.74    2.02 
   4   3   2   20.27    0.52 
   4   3   2   19.91    0.54 
   4   3   2   20.61    0.50 
   4  -3  -2   19.42    0.55 
   4   3   2   20.14    0.54 
   4  -3  -2   19.73    0.58 
   4  -3  -2   19.37    0.56 
   4  -3  -2   19.76    0.54 
   4   3   2   20.44    0.49 
  -4  -3  -2   19.81    0.53 
  -4  -3  -2   20.07    0.53 
  -4   3   2   18.58    0.56 
  -4   3   2   19.44    0.56 
  -4  -3  -2   20.20    0.49 
  -4   3   2   19.37    0.57 
  -4   3   2   19.45    0.55 
   4  -4  -2    1.94    0.13 
   4   4   2    1.92    0.08 
   4  -4  -2    1.70    0.12 
   4   4   2    1.97    0.12 
   4   4   2    1.97    0.10 
   4   4   2    2.00    0.12 
   4  -4  -2    1.78    0.15 
  -4   4   2    1.68    0.14 
  -4  -4  -2    1.96    0.10 
  -4   4   2    1.77    0.12 
  -4  -4  -2    1.94    0.09 
  -4  -4  -2    1.85    0.10 
  -4   4   2    1.56    0.14 
  -4   4   2    1.66    0.14 
   4   5   2   11.24    0.32 
   4  -5  -2   12.21    0.40 
   4  -5  -2   11.51    0.34 
   4   5   2   11.48    0.35 
   4  -5  -2   11.45    0.40 
   4  -5  -2   11.68    0.36 
  -4   5   2   12.06    0.37 
  -4  -5  -2   11.78    0.34 
  -4  -5  -2   11.90    0.31 
  -4  -5  -2   11.59    0.33 
  -4   5   2   10.99    0.39 
  -4   5   2   11.61    0.40 
  -4   5   2   11.38    0.41 
   4  -6  -2   21.54    0.59 
   4  -6  -2   21.83    0.58 
   4   6   2   21.68    0.57 
   4   6   2   21.70    0.60 
   4  -6  -2   22.99    0.66 
  -4   6   2   22.40    0.62 
  -4  -6  -2   22.18    0.56 
  -4   6   2   22.37    0.66 
  -4   6   2   21.69    0.65 
  -4   6   2   22.03    0.65 
  -4  -6  -2   22.53    0.54 
  -4  -6  -2   21.62    0.58 
  -4   6   2   21.58    0.67 
   4   7   2    9.24    0.30 
   4  -7  -2    9.13    0.29 
   4  -7  -2    8.74    0.28 
   4   7   2    9.14    0.31 
   4   7   2    9.90    0.29 
   4  -7  -2    9.41    0.37 
  -4   7   2    8.99    0.34 
  -4   7   2    9.41    0.33 
  -4   7   2    9.24    0.39 
  -4   7   2    8.95    0.35 
  -4  -7  -2    9.58    0.24 
  -4   7   2    9.48    0.38 
  -4   7   2    9.30    0.36 
   4   8   2    2.59    0.15 
   4  -8  -2    2.52    0.12 
   4   8   2    2.54    0.16 
   4   8   2    2.35    0.16 
   4  -8  -2    2.43    0.21 
   4  -8  -2    2.39    0.13 
  -4   8   2    2.59    0.20 
  -4   8   2    2.46    0.20 
  -4   8   2    2.53    0.18 
  -4   8   2    2.31    0.19 
  -4   8   2    2.58    0.23 
  -4   8   2    2.06    0.24 
   4   9   2    5.27    0.24 
   4  -9  -2    5.28    0.30 
   4   9   2    5.32    0.23 
   4  -9  -2    5.08    0.16 
   4   9   2    5.20    0.24 
   4  -9  -2    5.22    0.16 
  -4   9   2    4.99    0.27 
  -4   9   2    5.14    0.26 
  -4   9   2    4.69    0.31 
  -4   9   2    4.89    0.33 
  -4   9   2    5.04    0.27 
  -4   9   2    5.14    0.27 
   4 -10  -2    6.88    0.35 
   4  10   2    6.12    0.27 
   4  10   2    6.26    0.29 
   4  10   2    6.46    0.28 
  -4  10   2    6.70    0.32 
  -4  10   2    6.21    0.38 
  -4  10   2    6.71    0.32 
  -4  10   2    5.26    0.31 
  -4  10   2    6.26    0.36 
  -4  10   2    6.34    0.31 
   4  11   2   19.52    0.61 
   4  11   2   19.25    0.59 
   4 -11  -2   18.71    0.67 
   4  11   2   19.64    0.63 
  -4  11   2   19.39    0.72 
  -4  11   2   20.39    0.63 
  -4  11   2   20.36    0.63 
  -4  11   2   20.50    0.64 
  -4  11   2   19.70    0.74 
  -4  11   2   20.75    0.64 
   4  12   2    6.54    0.30 
   4  12   2    6.61    0.35 
   4  12   2    6.82    0.35 
  -4  12   2    6.51    0.34 
  -4  12   2    5.87    0.33 
  -4  12   2    6.74    0.37 
  -4  12   2    6.13    0.42 
  -4  12   2    6.31    0.45 
  -4  12   2    6.86    0.33 
   4  13   2    1.42    0.21 
   4  13   2    0.81    0.14 
   4  13   2    1.09    0.20 
   4 -13  -2    1.23    0.23 
  -4  13   2    0.98    0.23 
  -4  13   2    0.96    0.20 
  -4  13   2    1.23    0.27 
  -4  13   2    1.08    0.16 
  -4  13   2    1.18    0.17 
  -4  13   2    1.11    0.18 
   4  14   2    7.17    0.43 
   4  14   2    7.87    0.45 
   4  14   2    7.68    0.46 
   4 -14  -2    7.18    0.71 
  -4  14   2    7.63    0.36 
  -4  14   2    8.26    0.56 
  -4  14   2    8.36    0.60 
  -4  14   2    7.83    0.44 
  -4  14   2    7.12    0.36 
   4  15   2    2.26    0.30 
   4  15   2    2.51    0.30 
   4  15   2    2.26    0.29 
  -4  15   2    2.61    0.41 
  -4  15   2    1.74    0.35 
  -4  15   2    2.62    0.29 
  -4  15   2    2.46    0.28 
   4  16   2    2.65    0.36 
   4  16   2    3.27    0.36 
   4  16   2    2.94    0.37 
  -4  16   2    3.45    0.48 
  -4  16   2    2.79    0.29 
  -4  16   2    2.85    0.43 
   5  16  -2    0.52    0.30 
   5  16  -2   -0.12    0.31 
  -5  16  -2    0.51    0.27 
  -5  16  -2    0.03    0.46 
  -5  16  -2   -0.03    0.37 
  -5  16  -2    0.25    0.34 
   5  15  -2    3.85    0.39 
   5  15  -2    4.33    0.30 
  -5  15  -2    4.40    0.47 
  -5  15  -2    4.08    0.50 
  -5  15  -2    3.02    0.59 
  -5  15  -2    4.33    0.43 
  -5  15  -2    3.56    0.37 
   5  14  -2    4.03    0.39 
   5  14  -2    2.82    0.25 
   5  14  -2    3.58    0.41 
   5  14  -2    2.88    0.18 
  -5  14  -2    3.50    0.31 
  -5  14  -2    3.11    0.32 
  -5  14  -2    3.71    0.42 
  -5  14  -2    3.61    0.43 
  -5  14  -2    3.22    0.34 
  -5  14  -2    2.91    0.30 
   5  13  -2    3.38    0.18 
   5  13  -2    3.35    0.23 
   5  13  -2    3.81    0.35 
   5  13  -2    3.78    0.35 
  -5  13  -2    3.88    0.38 
  -5  13  -2    3.45    0.29 
  -5  13  -2    4.43    0.47 
  -5  13  -2    2.79    0.37 
  -5  13  -2    3.35    0.38 
  -5  13  -2    4.12    0.37 
   5  12  -2    0.95    0.18 
   5  12  -2    0.75    0.17 
   5  12  -2    0.81    0.09 
   5  12  -2    0.75    0.12 
   5 -12   2    1.07    0.19 
  -5  12  -2    0.84    0.20 
  -5  12  -2    0.69    0.20 
  -5  12  -2    0.77    0.15 
  -5  12  -2    0.95    0.25 
  -5  12  -2    0.81    0.18 
   5  11  -2   28.05    0.75 
   5  11  -2   29.03    0.82 
   5  11  -2   30.02    0.84 
   5  11  -2   28.62    0.72 
  -5  11  -2   27.18    0.86 
  -5  11  -2   27.53    0.88 
  -5  11  -2   27.86    0.83 
  -5  11  -2   28.22    0.93 
  -5  11  -2   28.36    0.87 
   5 -10   2    4.67    0.19 
   5 -10   2    4.54    0.17 
   5  10  -2    4.29    0.21 
   5  10  -2    4.31    0.18 
   5  10  -2    5.16    0.27 
  -5  10  -2    4.01    0.32 
  -5  10  -2    4.07    0.27 
  -5  10  -2    4.90    0.29 
  -5  10  -2    3.88    0.35 
  -5  10  -2    4.39    0.30 
   5  -9   2   19.96    0.55 
   5  -9   2   19.49    0.53 
   5   9  -2   20.19    0.58 
   5   9  -2   20.12    0.54 
   5   9  -2   19.36    0.52 
  -5   9  -2   19.73    0.64 
  -5   9  -2   20.66    0.69 
  -5   9  -2   18.69    0.66 
  -5  -9   2   19.79    0.50 
  -5   9  -2   19.10    0.62 
  -5   9  -2   19.66    0.63 
  -5  -9   2   19.88    0.48 
   5  -8   2    3.83    0.18 
   5   8  -2    3.77    0.17 
   5   8  -2    3.79    0.17 
   5  -8   2    4.14    0.21 
   5  -8   2    3.62    0.25 
   5   8  -2    4.07    0.20 
  -5   8  -2    3.57    0.25 
  -5   8  -2    3.81    0.29 
  -5   8  -2    3.39    0.23 
  -5  -8   2    3.82    0.16 
  -5  -8   2    3.61    0.13 
  -5   8  -2    4.10    0.29 
  -5   8  -2    3.38    0.24 
   5   7  -2    6.74    0.24 
   5  -7   2    6.60    0.25 
   5   7  -2    6.53    0.23 
   5   7  -2    6.88    0.23 
   5  -7   2    6.20    0.27 
   5  -7   2    7.23    0.31 
  -5  -7   2    6.90    0.20 
  -5   7  -2    6.64    0.33 
  -5   7  -2    6.56    0.30 
  -5   7  -2    6.54    0.34 
  -5   7  -2    6.32    0.30 
  -5   7  -2    5.20    0.41 
   5  -6   2    2.72    0.32 
   5   6  -2    3.20    0.15 
   5  -6   2    3.01    0.24 
   5   6  -2    3.25    0.12 
   5  -6   2    3.36    0.18 
   5   6  -2    3.26    0.15 
   5   6  -2    3.23    0.16 
   5  -6   2    2.86    0.19 
  -5   6  -2    2.88    0.20 
  -5   6  -2    3.21    0.21 
  -5   6  -2    2.94    0.23 
  -5  -6   2    2.88    0.12 
  -5   6  -2    3.33    0.20 
  -5   6  -2    2.80    0.23 
   5   5  -2   92.59    2.21 
   5   5  -2   92.45    2.21 
   5   5  -2   94.90    2.24 
   5  -5   2   94.69    2.25 
   5   5  -2   95.58    2.17 
   5  -5   2   90.32    2.28 
   5  -5   2   92.76    2.31 
   5  -5   2   91.40    2.26 
  -5  -5   2   92.67    2.19 
  -5   5  -2   94.81    2.28 
  -5   5  -2   89.44    2.29 
  -5   5  -2   90.64    2.29 
  -5   5  -2   92.78    2.28 
   5   4  -2   32.54    0.81 
   5   4  -2   32.84    0.81 
   5  -4   2   30.53    0.84 
   5  -4   2   31.66    0.86 
   5  -4   2   31.55    0.89 
   5  -4   2   31.98    0.84 
   5  -4   2   31.64    0.86 
   5   4  -2   32.24    0.84 
  -5  -4   2   28.47    0.86 
  -5   4  -2   33.30    0.86 
  -5  -4   2   31.95    0.79 
  -5   4  -2   31.44    0.86 
  -5   4  -2   32.60    0.88 
  -5   4  -2   30.48    0.87 
   5  -3   2  179.62    4.17 
   5   3  -2  178.22    4.14 
   5  -3   2  178.98    4.19 
   5   3  -2  176.36    4.14 
   5   3  -2  175.80    4.17 
   5  -3   2  172.69    4.21 
   5  -3   2  173.32    4.18 
   5  -3   2  175.57    4.17 
  -5   3  -2  171.92    4.18 
  -5  -3   2  172.70    4.12 
  -5   3  -2  174.69    4.18 
  -5   3  -2  180.49    4.20 
  -5   3  -2  178.49    4.18 
  -5  -3   2  175.64    4.15 
   5  -2   2   21.70    0.59 
   5  -2   2   20.17    0.59 
   5  -2   2   21.56    0.58 
   5   2  -2   21.10    0.57 
   5   2  -2   20.06    0.56 
   5   2  -2   21.13    0.59 
   5  -2   2   20.27    0.62 
   5  -2   2   20.65    0.59 
   5   2  -2   21.52    0.51 
   5   2  -2   20.94    0.56 
  -5   2  -2   20.65    0.58 
  -5  -2   2   19.98    0.50 
  -5  -2   2   20.31    0.58 
  -5   2  -2   20.47    0.59 
  -5   2  -2   20.63    0.59 
  -5   2  -2   20.66    0.60 
  -5  -2   2   19.23    0.55 
   5   1  -2   29.74    0.81 
   5  -1   2   30.97    0.78 
   5  -1   2   29.35    0.82 
   5  -1   2   30.74    0.80 
   5   1  -2   29.88    0.78 
   5   1  -2   30.16    0.78 
   5   1  -2   29.64    0.77 
   5  -1   2   30.09    0.79 
  -5  -1   2   29.62    0.72 
  -5   1  -2   30.54    0.79 
  -5   1  -2   29.42    0.79 
  -5   1  -2   28.56    0.80 
  -5  -1   2   28.97    0.79 
  -5   1  -2   29.29    0.78 
  -5  -1   2   28.54    0.77 
  -5  -1   2   29.76    0.77 
   5   0  -2   16.18    0.46 
   5   0   2   16.06    0.49 
   5   0  -2   15.60    0.49 
   5   0   2   15.84    0.45 
   5   0  -2   16.21    0.47 
   5   0   2   15.89    0.46 
   5   0   2   16.60    0.48 
  -5   0  -2   15.83    0.48 
  -5   0   2   15.48    0.46 
  -5   0   2   16.46    0.42 
  -5   0  -2   15.71    0.46 
  -5   0  -2   16.10    0.46 
  -5   0   2   15.72    0.46 
  -5   0   2   16.01    0.46 
  -5   0  -2   15.86    0.45 
  -5   0   2   15.14    0.48 
   5   1   2   29.58    0.77 
   5  -1  -2   29.16    0.78 
   5   1   2   28.79    0.78 
   5   1   2   28.81    0.75 
   5   1   2   29.15    0.80 
   5  -1  -2   28.14    0.81 
   5  -1  -2   28.61    0.79 
  -5   1   2   29.22    0.80 
  -5  -1  -2   29.38    0.77 
  -5   1   2   30.26    0.78 
  -5   1   2   30.60    0.78 
  -5   1   2   30.02    0.78 
  -5  -1  -2   29.95    0.72 
  -5  -1  -2   29.41    0.74 
  -5  -1  -2   28.75    0.79 
  -5   1   2   30.37    0.76 
   5   2   2   20.81    0.59 
   5  -2  -2   20.08    0.61 
   5  -2  -2   20.79    0.58 
   5  -2  -2   20.09    0.57 
   5   2   2   20.30    0.58 
   5   2   2   21.04    0.55 
   5   2   2   20.74    0.56 
   5  -2  -2   21.60    0.60 
  -5  -2  -2   21.26    0.58 
  -5   2   2   19.85    0.58 
  -5   2   2   20.96    0.58 
  -5  -2  -2   19.74    0.56 
  -5   2   2   20.08    0.58 
  -5   2   2   21.23    0.61 
  -5   2   2   20.71    0.57 
  -5  -2  -2   21.46    0.51 
   5  -3  -2  176.84    4.21 
   5  -3  -2  179.69    4.17 
   5   3   2  172.75    4.16 
   5  -3  -2  169.56    4.18 
   5   3   2  177.04    4.12 
   5  -3  -2  176.78    4.16 
   5   3   2  176.38    4.16 
   5   3   2  178.73    4.14 
  -5  -3  -2  177.65    4.15 
  -5   3   2  174.21    4.17 
  -5  -3  -2  177.48    4.14 
  -5   3   2  163.76    4.17 
  -5   3   2  183.41    4.18 
  -5   3   2  179.23    4.20 
  -5  -3  -2  177.39    4.09 
  -5   3   2  173.47    4.18 
   5  -4  -2   31.93    0.89 
   5   4   2   30.95    0.80 
   5  -4  -2   31.25    0.84 
   5  -4  -2   31.28    0.83 
   5   4   2   32.31    0.79 
   5  -4  -2   31.35    0.87 
   5   4   2   31.68    0.84 
   5   4   2   32.32    0.76 
  -5  -4  -2   32.94    0.82 
  -5   4   2   31.03    0.88 
  -5  -4  -2   31.20    0.77 
  -5   4   2   31.98    0.87 
  -5  -4  -2   31.38    0.83 
  -5   4   2   32.11    0.87 
  -5  -4  -2   32.93    0.82 
  -5   4   2   31.13    0.87 
  -5   4   2   31.49    0.85 
   5   5   2   94.62    2.17 
   5  -5  -2   93.78    2.29 
   5   5   2   93.46    2.20 
   5   5   2   95.23    2.24 
   5  -5  -2   90.85    2.23 
   5  -5  -2   93.99    2.25 
  -5  -5  -2   91.70    2.22 
  -5   5   2   96.28    2.31 
  -5   5   2   91.94    2.29 
  -5  -5  -2   95.77    2.21 
  -5   5   2   89.82    2.28 
  -5   5   2   86.00    2.27 
  -5   5   2   88.81    2.29 
  -5   5   2   93.03    2.26 
   5  -6  -2    2.53    0.31 
   5   6   2    2.73    0.17 
   5   6   2    2.91    0.13 
   5  -6  -2    2.68    0.16 
   5  -6  -2    3.04    0.18 
  -5   6   2    2.86    0.23 
  -5   6   2    3.12    0.19 
  -5   6   2    3.20    0.22 
  -5   6   2    3.00    0.22 
  -5  -6  -2    2.99    0.14 
  -5  -6  -2    3.23    0.13 
  -5  -6  -2    3.43    0.16 
  -5   6   2    2.96    0.22 
   5  -7  -2    6.51    0.25 
   5   7   2    6.74    0.23 
   5  -7  -2    6.66    0.26 
   5  -7  -2    7.10    0.32 
   5   7   2    6.40    0.26 
  -5   7   2    7.25    0.33 
  -5  -7  -2    7.63    0.25 
  -5  -7  -2    6.65    0.19 
  -5   7   2    6.98    0.29 
  -5   7   2    6.53    0.33 
  -5   7   2    6.54    0.32 
  -5   7   2    6.60    0.34 
  -5  -7  -2    6.53    0.21 
   5  -8  -2    3.91    0.27 
   5  -8  -2    3.64    0.18 
   5   8   2    3.98    0.21 
   5  -8  -2    3.59    0.19 
   5   8   2    4.02    0.18 
   5   8   2    3.94    0.18 
  -5   8   2    3.54    0.29 
  -5   8   2    3.90    0.24 
  -5   8   2    3.74    0.26 
  -5   8   2    4.09    0.29 
  -5   8   2    3.40    0.25 
   5   9   2   19.96    0.56 
   5   9   2   19.59    0.56 
   5   9   2   18.87    0.57 
   5  -9  -2   19.13    0.53 
   5  -9  -2   19.11    0.65 
   5  -9  -2   19.11    0.52 
  -5   9   2   19.77    0.61 
  -5   9   2   20.22    0.67 
  -5   9   2   19.11    0.69 
  -5   9   2   19.57    0.64 
  -5   9   2   19.42    0.64 
   5 -10  -2    4.28    0.31 
   5  10   2    4.55    0.25 
   5 -10  -2    4.41    0.16 
   5 -10  -2    4.46    0.16 
   5  10   2    4.38    0.24 
   5  10   2    4.58    0.24 
  -5  10   2    4.34    0.27 
  -5  10   2    4.88    0.37 
  -5  10   2    4.31    0.29 
  -5  10   2    4.40    0.30 
  -5  10   2    4.80    0.35 
   5  11   2   28.66    0.80 
   5  11   2   27.91    0.80 
   5  11   2   27.82    0.80 
  -5  11   2   28.78    0.93 
  -5  11   2   28.06    0.86 
  -5  11   2   28.96    0.85 
  -5  11   2   27.71    0.96 
  -5  11   2   29.47    0.86 
   5  12   2    0.83    0.16 
   5  12   2    0.68    0.16 
   5 -12  -2    0.99    0.21 
   5  12   2    0.76    0.13 
  -5  12   2    0.48    0.22 
  -5  12   2    0.84    0.22 
  -5  12   2    0.52    0.17 
  -5  12   2    0.80    0.17 
  -5  12   2    0.75    0.18 
   5 -13  -2    3.92    0.40 
   5  13   2    3.86    0.33 
   5  13   2    3.48    0.28 
   5  13   2    3.27    0.32 
  -5  13   2    3.66    0.33 
  -5  13   2    4.21    0.41 
  -5  13   2    3.72    0.31 
  -5  13   2    4.19    0.35 
  -5  13   2    3.08    0.37 
  -5  13   2    3.59    0.44 
   5  14   2    2.67    0.29 
   5  14   2    3.83    0.40 
   5  14   2    2.58    0.38 
  -5  14   2    3.45    0.40 
  -5  14   2    4.18    0.40 
  -5  14   2    3.47    0.33 
  -5  14   2    3.18    0.34 
  -5  14   2    3.32    0.41 
   5  15   2    4.01    0.43 
   5  15   2    4.22    0.36 
   5  15   2    4.07    0.44 
  -5  15   2    4.45    0.47 
  -5  15   2    4.45    0.51 
  -5  15   2    4.65    0.36 
  -5  15   2    5.46    0.64 
   5  16   2   -0.14    0.28 
   5  16   2    0.49    0.22 
   5  16   2    0.13    0.30 
  -5  16   2    0.76    0.51 
  -5  16   2    0.25    0.37 
  -5  16   2    0.56    0.21 
   6  15  -2    4.60    0.52 
   6  15  -2    3.48    0.43 
  -6  15  -2    3.36    0.36 
  -6  15  -2    2.61    0.45 
  -6  15  -2    3.54    0.41 
  -6  15  -2    4.04    0.49 
   6  14  -2    3.26    0.37 
   6  14  -2    3.23    0.26 
   6  14  -2    3.42    0.22 
   6  14  -2    3.01    0.32 
  -6  14  -2    3.41    0.34 
  -6  14  -2    2.96    0.41 
  -6  14  -2    3.41    0.36 
  -6  14  -2    2.79    0.39 
   6  13  -2    6.81    0.39 
   6  13  -2    6.35    0.26 
   6  13  -2    6.10    0.30 
   6  13  -2    6.03    0.41 
  -6  13  -2    5.25    0.48 
  -6  13  -2    6.55    0.39 
  -6  13  -2    6.53    0.46 
  -6  13  -2    5.91    0.47 
  -6  13  -2    5.31    0.55 
  -6  13  -2    6.08    0.53 
   6 -12   2   17.22    0.75 
   6  12  -2   17.09    0.48 
   6  12  -2   14.67    0.82 
   6  12  -2   17.20    0.57 
   6  12  -2   16.89    0.52 
  -6  12  -2   17.34    0.67 
  -6  12  -2   17.21    0.62 
  -6  12  -2   16.71    0.66 
  -6  12  -2   17.86    0.74 
  -6  12  -2   16.38    0.67 
   6  11  -2    7.35    0.33 
   6 -11   2    7.19    0.27 
   6 -11   2    7.02    0.25 
   6  11  -2    7.15    0.27 
   6  11  -2    7.26    0.29 
  -6  11  -2    7.46    0.47 
  -6  11  -2    7.43    0.39 
  -6  11  -2    7.16    0.44 
  -6  11  -2    7.44    0.44 
  -6  11  -2    6.95    0.41 
   6  10  -2   12.45    0.41 
   6  10  -2   11.72    0.37 
   6  10  -2   12.49    0.39 
   6 -10   2   12.38    0.39 
   6 -10   2   11.83    0.37 
  -6  10  -2   11.21    0.48 
  -6  10  -2   11.95    0.51 
  -6  10  -2   12.09    0.55 
  -6  10  -2   12.40    0.50 
  -6  10  -2   11.44    0.53 
   6   9  -2   16.03    0.46 
   6   9  -2   16.39    0.48 
   6  -9   2   16.37    0.48 
   6   9  -2   16.32    0.47 
   6  -9   2   15.87    0.50 
  -6  -9   2   15.89    0.41 
  -6   9  -2   16.13    0.57 
  -6   9  -2   15.96    0.68 
  -6   9  -2   16.46    0.58 
  -6   9  -2   14.36    0.76 
  -6  -9   2   16.34    0.44 
  -6   9  -2   16.26    0.57 
   6  -8   2   22.58    0.65 
   6   8  -2   21.88    0.57 
   6   8  -2   21.97    0.61 
   6   8  -2   22.11    0.60 
   6  -8   2   22.04    0.63 
   6   8  -2   22.34    0.59 
  -6  -8   2   22.44    0.62 
  -6   8  -2   22.24    0.75 
  -6   8  -2   22.83    0.71 
  -6  -8   2   22.27    0.57 
  -6   8  -2   22.09    0.74 
  -6   8  -2   22.23    0.71 
  -6   8  -2   22.62    0.71 
   6   7  -2   80.19    1.94 
   6  -7   2   80.42    1.97 
   6  -7   2   80.32    1.98 
   6   7  -2   79.16    1.93 
   6   7  -2   82.26    1.90 
   6   7  -2   81.80    1.89 
   6  -7   2   81.96    2.04 
  -6  -7   2   79.73    1.91 
  -6   7  -2   80.54    2.08 
  -6  -7   2   80.73    1.95 
  -6   7  -2   78.25    2.02 
  -6  -7   2   76.15    1.92 
  -6   7  -2   80.63    2.04 
  -6   7  -2   81.09    2.03 
  -6   7  -2   77.51    2.05 
   6  -6   2   25.08    0.73 
   6  -6   2   24.93    0.69 
   6   6  -2   23.81    0.65 
   6  -6   2   25.13    0.70 
   6   6  -2   23.43    0.67 
   6   6  -2   23.95    0.65 
  -6   6  -2   24.61    0.75 
  -6   6  -2   23.37    0.72 
  -6   6  -2   23.69    0.77 
  -6  -6   2   24.07    0.62 
  -6   6  -2   24.61    0.74 
  -6   6  -2   24.07    0.73 
   6  -5   2    4.66    0.23 
   6   5  -2    4.44    0.22 
   6  -5   2    3.90    0.36 
   6  -5   2    4.93    0.24 
   6   5  -2    4.88    0.21 
   6   5  -2    4.97    0.21 
  -6   5  -2    3.43    0.34 
  -6   5  -2    5.10    0.28 
  -6   5  -2    5.11    0.30 
  -6  -5   2    5.06    0.18 
  -6   5  -2    4.88    0.26 
  -6   5  -2    4.85    0.27 
   6  -4   2   16.00    0.49 
   6   4  -2   16.37    0.47 
   6   4  -2   16.27    0.47 
   6   4  -2   16.11    0.50 
   6  -4   2   17.08    0.52 
   6   4  -2   16.20    0.48 
   6  -4   2   16.52    0.51 
   6  -4   2   16.45    0.56 
   6  -4   2   16.11    0.52 
  -6   4  -2   15.83    0.53 
  -6   4  -2   15.35    0.55 
  -6  -4   2   15.49    0.47 
  -6  -4   2   15.57    0.44 
  -6   4  -2   15.83    0.52 
  -6   4  -2   15.92    0.51 
  -6   4  -2   15.39    0.51 
   6  -3   2   29.51    0.82 
   6   3  -2   29.80    0.79 
   6  -3   2   29.27    0.86 
   6   3  -2   30.76    0.82 
   6  -3   2   30.11    0.82 
   6  -3   2   30.38    0.83 
   6   3  -2   30.48    0.80 
   6  -3   2   29.37    0.81 
   6   3  -2   30.18    0.78 
  -6   3  -2   28.89    0.86 
  -6   3  -2   28.06    0.81 
  -6  -3   2   29.01    0.77 
  -6   3  -2   29.72    0.84 
  -6   3  -2   28.79    0.82 
  -6   3  -2   29.14    0.82 
  -6  -3   2   29.19    0.80 
   6  -2   2   15.15    0.48 
   6   2  -2   15.34    0.49 
   6  -2   2   15.03    0.47 
   6   2  -2   15.06    0.45 
   6   2  -2   15.32    0.46 
   6  -2   2   15.17    0.48 
   6  -2   2   15.34    0.51 
   6  -2   2   15.27    0.47 
   6   2  -2   15.94    0.46 
  -6  -2   2   15.05    0.44 
  -6   2  -2   14.66    0.47 
  -6   2  -2   15.44    0.50 
  -6  -2   2   13.36    0.37 
  -6  -2   2   14.59    0.47 
  -6   2  -2   15.51    0.48 
  -6   2  -2   14.88    0.47 
   6   1  -2   36.76    0.96 
   6  -1   2   36.89    0.97 
   6  -1   2   35.83    0.95 
   6   1  -2   35.80    0.96 
   6  -1   2   35.36    1.00 
   6   1  -2   37.98    1.00 
   6   1  -2   37.15    0.96 
   6  -1   2   36.79    0.98 
   6  -1   2   36.23    0.97 
  -6  -1   2   35.62    0.95 
  -6   1  -2   36.80    0.97 
  -6   1  -2   38.05    0.97 
  -6  -1   2   35.59    0.98 
  -6   1  -2   36.31    0.95 
  -6   1  -2   37.61    1.00 
  -6  -1   2   37.01    0.89 
   6   0   2    6.49    0.25 
   6   0   2    5.81    0.28 
   6   0   2    6.61    0.24 
   6   0  -2    6.00    0.28 
   6   0  -2    6.08    0.25 
   6   0   2    6.12    0.26 
   6   0  -2    6.35    0.25 
   6   0  -2    5.75    0.24 
  -6   0   2    5.92    0.24 
  -6   0   2    6.30    0.25 
  -6   0   2    6.01    0.27 
  -6   0  -2    6.25    0.25 
  -6   0  -2    6.03    0.23 
  -6   0  -2    6.04    0.27 
  -6   0   2    6.05    0.25 
  -6   0   2    6.12    0.21 
   6   1   2   38.39    0.96 
   6   1   2   34.15    0.98 
   6  -1  -2   36.44    0.96 
   6   1   2   37.49    0.94 
   6  -1  -2   37.14    1.01 
   6  -1  -2   38.54    0.98 
   6   1   2   35.56    0.96 
   6  -1  -2   36.86    0.96 
  -6   1   2   35.09    0.99 
  -6  -1  -2   36.69    0.89 
  -6   1   2   35.50    0.92 
  -6  -1  -2   36.80    0.98 
  -6   1   2   35.91    0.96 
  -6   1   2   35.64    0.96 
  -6   1   2   37.87    0.96 
  -6  -1  -2   35.18    0.99 
  -6  -1  -2   36.56    0.95 
  -6  -1  -2   35.14    0.92 
   6  -2  -2   14.90    0.48 
   6   2   2   15.42    0.43 
   6   2   2   14.86    0.45 
   6   2   2   14.54    0.47 
   6  -2  -2   14.76    0.47 
   6  -2  -2   15.44    0.51 
   6  -2  -2   14.65    0.46 
  -6   2   2   15.49    0.47 
  -6   2   2   15.33    0.48 
  -6  -2  -2   15.93    0.46 
  -6  -2  -2   15.43    0.38 
  -6   2   2   14.75    0.47 
  -6   2   2   14.02    0.49 
  -6  -2  -2   15.61    0.47 
  -6   2   2   14.63    0.45 
  -6  -2  -2   15.25    0.49 
   6   3   2   28.57    0.78 
   6  -3  -2   29.67    0.86 
   6  -3  -2   29.83    0.83 
   6  -3  -2   29.06    0.80 
   6   3   2   27.44    0.79 
   6   3   2   29.69    0.76 
   6  -3  -2   29.16    0.81 
  -6  -3  -2   29.50    0.79 
  -6   3   2   28.58    0.84 
  -6  -3  -2   29.32    0.78 
  -6   3   2   29.52    0.82 
  -6   3   2   30.42    0.82 
  -6   3   2   29.74    0.81 
  -6  -3  -2   30.18    0.70 
  -6   3   2   28.54    0.80 
  -6  -3  -2   29.13    0.81 
   6  -4  -2   14.86    0.52 
   6  -4  -2   15.03    0.50 
   6   4   2   15.63    0.47 
   6   4   2   15.98    0.45 
   6   4   2   15.61    0.49 
   6  -4  -2   16.05    0.49 
  -6  -4  -2   16.94    0.47 
  -6   4   2   16.84    0.55 
  -6  -4  -2   16.52    0.48 
  -6   4   2   16.33    0.52 
  -6  -4  -2   16.44    0.40 
  -6  -4  -2   16.20    0.50 
  -6   4   2   14.92    0.51 
  -6   4   2   16.39    0.52 
  -6   4   2   16.43    0.54 
  -6   4   2   15.91    0.50 
   6  -5  -2    5.10    0.27 
   6   5   2    5.06    0.19 
   6   5   2    5.34    0.24 
   6  -5  -2    5.00    0.24 
   6   5   2    5.15    0.15 
   6  -5  -2    5.16    0.25 
   6   5   2    5.03    0.20 
  -6   5   2    4.84    0.26 
  -6   5   2    4.60    0.28 
  -6   5   2    4.56    0.27 
  -6  -5  -2    5.42    0.21 
  -6  -5  -2    4.83    0.22 
  -6   5   2    4.74    0.27 
  -6   5   2    4.86    0.27 
  -6  -5  -2    5.02    0.21 
   6  -6  -2   23.63    0.74 
   6   6   2   24.30    0.64 
   6   6   2   24.72    0.64 
   6   6   2   24.34    0.60 
   6   6   2   23.42    0.68 
   6  -6  -2   23.85    0.69 
   6  -6  -2   24.12    0.68 
  -6   6   2   24.75    0.71 
  -6   6   2   24.09    0.74 
  -6  -6  -2   24.74    0.64 
  -6   6   2   23.60    0.73 
  -6   6   2   24.06    0.75 
  -6   6   2   24.10    0.75 
  -6   6   2   24.81    0.76 
  -6  -6  -2   23.91    0.65 
   6   7   2   80.28    1.90 
   6   7   2   81.56    1.99 
   6  -7  -2   83.54    2.06 
   6  -7  -2   80.27    1.98 
   6  -7  -2   79.50    1.96 
  -6   7   2   78.02    2.05 
  -6   7   2   80.47    2.05 
  -6   7   2   78.74    2.05 
  -6   7   2   79.93    2.06 
  -6   7   2   81.72    2.02 
  -6   7   2   80.29    2.08 
  -6  -7  -2   80.06    1.95 
  -6  -7  -2   78.54    1.93 
  -6  -7  -2   81.66    1.91 
   6   8   2   22.03    0.65 
   6  -8  -2   21.99    0.62 
   6  -8  -2   23.63    0.73 
   6  -8  -2   22.36    0.64 
   6   8   2   22.45    0.58 
  -6  -8  -2   22.15    0.55 
  -6   8   2   23.16    0.72 
  -6  -8  -2   21.96    0.57 
  -6   8   2   21.27    0.75 
  -6   8   2   21.71    0.72 
  -6   8   2   21.87    0.68 
  -6   8   2   21.84    0.72 
  -6   8   2   21.73    0.73 
   6  -9  -2   15.78    0.47 
   6   9   2   16.24    0.46 
   6   9   2   15.29    0.51 
   6   9   2   16.40    0.48 
   6  -9  -2   16.47    0.49 
   6  -9  -2   15.89    0.60 
  -6   9   2   15.81    0.60 
  -6   9   2   16.82    0.59 
  -6   9   2   15.90    0.64 
  -6   9   2   16.81    0.61 
  -6   9   2   15.69    0.59 
  -6   9   2   16.22    0.56 
   6 -10  -2   12.38    0.38 
   6  10   2   12.04    0.44 
   6  10   2   11.90    0.39 
   6  10   2   12.06    0.41 
   6 -10  -2   12.25    0.37 
  -6  10   2   12.43    0.49 
  -6  10   2   12.49    0.52 
  -6  10   2   12.45    0.52 
  -6  10   2   12.58    0.55 
  -6  10   2   13.42    0.53 
  -6  10   2   12.03    0.57 
   6 -11  -2    7.19    0.24 
   6  11   2    7.32    0.31 
   6  11   2    7.23    0.34 
   6 -11  -2    8.37    0.50 
   6 -11  -2    7.29    0.24 
   6  11   2    7.07    0.33 
  -6  11   2    6.88    0.40 
  -6  11   2    7.00    0.43 
  -6  11   2    7.14    0.48 
  -6  11   2    7.14    0.46 
  -6  11   2    7.94    0.42 
  -6  11   2    7.65    0.40 
   6  12   2   17.02    0.57 
   6 -12  -2   15.91    0.68 
   6  12   2   16.37    0.54 
   6  12   2   17.10    0.57 
  -6  12   2   16.02    0.71 
  -6  12   2   17.50    0.75 
  -6  12   2   17.43    0.65 
  -6  12   2   17.26    0.64 
  -6  12   2   17.10    0.69 
  -6  12   2   17.44    0.64 
   6  13   2    6.22    0.36 
   6  13   2    6.21    0.36 
   6  13   2    6.56    0.39 
  -6  13   2    7.14    0.57 
  -6  13   2    6.81    0.43 
  -6  13   2    6.01    0.54 
  -6  13   2    7.17    0.47 
  -6  13   2    6.76    0.44 
   6  14   2    3.53    0.33 
   6  14   2    3.22    0.35 
   6  14   2    3.77    0.39 
  -6  14   2    4.26    0.49 
  -6  14   2    3.15    0.40 
  -6  14   2    3.30    0.37 
  -6  14   2    3.50    0.43 
   6  15   2    3.79    0.40 
   6  15   2    3.33    0.60 
   6  15   2    3.15    0.31 
  -6  15   2    4.60    0.51 
  -6  15   2    4.09    0.49 
  -6  15   2    3.85    0.41 
   7  15  -2    2.40    0.35 
  -7  15  -2    2.12    0.36 
  -7  15  -2    1.64    0.41 
  -7  15  -2    1.59    0.47 
   7  14  -2    8.79    0.54 
   7  14  -2    9.24    0.43 
   7  14  -2    9.53    0.42 
  -7  14  -2    9.58    0.64 
  -7  14  -2    9.57    0.72 
  -7  14  -2    8.53    0.59 
  -7  14  -2    8.35    0.72 
   7  13  -2    4.70    0.40 
   7  13  -2    5.38    0.28 
   7  13  -2    5.72    0.32 
   7  13  -2    5.23    0.31 
  -7  13  -2    5.24    0.55 
  -7  13  -2    4.32    0.47 
  -7  13  -2    4.64    0.46 
  -7  13  -2    3.58    0.42 
  -7  13  -2    4.53    0.43 
   7 -12   2    3.73    0.20 
   7 -12   2    3.91    0.22 
   7  12  -2    3.90    0.24 
   7  12  -2    3.66    0.33 
   7  12  -2    3.96    0.25 
   7  12  -2    3.95    0.23 
   7  12  -2    3.64    0.27 
  -7  12  -2    3.85    0.43 
  -7  12  -2    3.74    0.36 
  -7  12  -2    5.10    0.50 
  -7  12  -2    3.44    0.35 
  -7  12  -2    3.89    0.47 
  -7  12  -2    4.71    0.43 
   7 -11   2   13.07    0.42 
   7  11  -2   13.52    0.40 
   7  11  -2   13.60    0.42 
   7 -11   2   12.78    0.72 
   7  11  -2   12.92    0.43 
   7  11  -2   12.99    0.45 
   7 -11   2   13.37    0.44 
  -7  11  -2   13.06    0.56 
  -7  11  -2   13.16    0.61 
  -7  11  -2   13.95    0.59 
  -7  11  -2   13.36    0.58 
  -7  11  -2   12.93    0.64 
   7  10  -2   10.24    0.37 
   7 -10   2   10.93    0.40 
   7  10  -2   10.31    0.38 
   7  10  -2   10.33    0.33 
   7 -10   2   10.02    0.39 
   7  10  -2   10.70    0.32 
  -7  10  -2   10.30    0.53 
  -7  10  -2   10.65    0.55 
  -7 -10   2   10.90    0.31 
  -7  10  -2   10.36    0.49 
  -7 -10   2   10.94    0.29 
  -7  10  -2   10.99    0.50 
  -7  10  -2   10.52    0.49 
   7   9  -2    8.68    0.25 
   7   9  -2    8.73    0.32 
   7  -9   2    8.88    0.36 
   7  -9   2    8.47    0.34 
   7   9  -2    8.67    0.33 
   7   9  -2    8.72    0.26 
  -7  -9   2    8.79    0.26 
  -7   9  -2    8.52    0.42 
  -7   9  -2    8.43    0.47 
  -7   9  -2    7.78    0.42 
  -7   9  -2    9.01    0.47 
  -7  -9   2    8.75    0.30 
   7  -8   2    0.65    0.12 
   7   8  -2    0.70    0.11 
   7  -8   2    0.73    0.14 
   7   8  -2    0.89    0.12 
  -7   8  -2    0.89    0.29 
  -7  -8   2    0.89    0.11 
  -7   8  -2    0.88    0.23 
  -7   8  -2    1.13    0.17 
  -7  -8   2    0.88    0.09 
  -7   8  -2    0.61    0.14 
  -7  -8   2    0.83    0.10 
  -7   8  -2    0.67    0.16 
   7   7  -2   53.20    1.35 
   7  -7   2   53.38    1.38 
   7   7  -2   53.18    1.35 
   7  -7   2   54.39    1.45 
   7  -7   2   52.05    1.39 
  -7   7  -2   52.69    1.45 
  -7  -7   2   53.20    1.31 
  -7   7  -2   52.81    1.49 
  -7  -7   2   55.74    1.37 
  -7   7  -2   55.92    1.45 
  -7   7  -2   53.84    1.47 
  -7   7  -2   52.15    1.44 
   7  -6   2    8.35    0.34 
   7  -6   2    8.37    0.35 
   7  -6   2    8.55    0.38 
   7   6  -2    7.90    0.30 
   7   6  -2    8.12    0.31 
  -7  -6   2    7.61    0.30 
  -7   6  -2    7.67    0.41 
  -7   6  -2    8.19    0.38 
  -7   6  -2    8.11    0.37 
  -7   6  -2    8.20    0.36 
  -7   6  -2    8.23    0.39 
  -7  -6   2    8.20    0.33 
  -7  -6   2    8.43    0.27 
   7  -5   2   26.08    0.76 
   7   5  -2   26.14    0.73 
   7   5  -2   26.13    0.71 
   7  -5   2   26.30    0.78 
   7   5  -2   25.17    0.71 
   7  -5   2   25.73    0.74 
  -7  -5   2   26.56    0.75 
  -7   5  -2   25.25    0.77 
  -7   5  -2   26.09    0.78 
  -7  -5   2   25.07    0.68 
  -7   5  -2   25.06    0.77 
  -7   5  -2   24.82    0.79 
  -7  -5   2   26.28    0.71 
  -7   5  -2   26.07    0.83 
   7   4  -2    7.77    0.31 
   7  -4   2    7.57    0.33 
   7   4  -2    8.23    0.31 
   7  -4   2    8.09    0.34 
   7   4  -2    8.30    0.31 
   7   4  -2    8.23    0.34 
   7  -4   2    7.85    0.35 
   7  -4   2    7.64    0.32 
  -7   4  -2    7.99    0.36 
  -7   4  -2    8.19    0.34 
  -7   4  -2    7.80    0.35 
  -7   4  -2    8.42    0.36 
  -7  -4   2    8.31    0.28 
  -7   4  -2    8.59    0.40 
  -7  -4   2    8.25    0.32 
   7  -3   2    5.09    0.27 
   7   3  -2    5.35    0.25 
   7  -3   2    5.47    0.27 
   7  -3   2    5.74    0.27 
   7   3  -2    5.61    0.28 
   7   3  -2    5.47    0.24 
   7  -3   2    5.37    0.26 
   7   3  -2    5.79    0.25 
  -7  -3   2    5.44    0.23 
  -7   3  -2    4.90    0.27 
  -7   3  -2    5.23    0.27 
  -7   3  -2    5.37    0.32 
  -7  -3   2    5.54    0.26 
  -7   3  -2    5.34    0.27 
  -7   3  -2    5.36    0.28 
   7  -2   2    3.79    0.23 
   7   2  -2    3.87    0.21 
   7   2  -2    3.78    0.20 
   7  -2   2    3.89    0.22 
   7  -2   2    3.98    0.23 
   7   2  -2    3.66    0.20 
   7   2  -2    4.00    0.23 
  -7   2  -2    3.43    0.22 
  -7   2  -2    3.75    0.26 
  -7  -2   2    3.58    0.23 
  -7   2  -2    4.19    0.25 
  -7  -2   2    3.64    0.19 
  -7   2  -2    3.83    0.22 
  -7  -2   2    3.19    0.12 
   7   1  -2    2.46    0.18 
   7  -1   2    2.45    0.19 
   7   1  -2    2.76    0.18 
   7   1  -2    2.28    0.17 
   7  -1   2    2.49    0.20 
   7  -1   2    2.62    0.19 
   7   1  -2    2.57    0.20 
   7  -1   2    2.31    0.17 
  -7  -1   2    2.56    0.11 
  -7   1  -2    2.43    0.18 
  -7  -1   2    2.55    0.20 
  -7  -1   2    2.60    0.17 
  -7   1  -2    3.07    0.24 
  -7   1  -2    2.81    0.20 
  -7   1  -2    2.74    0.18 
   7   0   2   37.80    1.01 
   7   0   2   38.62    0.99 
   7   0   2   38.79    1.01 
   7   0  -2   37.44    1.05 
   7   0  -2   37.76    1.01 
   7   0  -2   36.97    1.00 
   7   0  -2   38.05    1.01 
   7   0   2   38.21    1.02 
   7   0  -2   37.81    1.01 
  -7   0   2   36.24    1.03 
  -7   0  -2   36.42    1.05 
  -7   0  -2   39.48    1.04 
  -7   0  -2   36.42    1.00 
  -7   0   2   37.81    0.94 
  -7   0  -2   37.14    0.98 
  -7   0   2   35.53    0.99 
  -7   0   2   38.00    1.00 
   7  -1  -2    2.87    0.19 
   7  -1  -2    2.78    0.19 
   7  -1  -2    3.08    0.23 
   7   1   2    2.40    0.19 
   7   1   2    2.85    0.17 
   7   1   2    2.76    0.18 
   7  -1  -2    2.52    0.19 
  -7   1   2    2.74    0.22 
  -7  -1  -2    2.43    0.11 
  -7  -1  -2    2.62    0.22 
  -7   1   2    2.65    0.18 
  -7   1   2    2.85    0.21 
  -7   1   2    2.47    0.17 
  -7  -1  -2    2.30    0.18 
  -7   1   2    2.54    0.15 
  -7  -1  -2    2.56    0.17 
  -7   1   2    2.49    0.18 
  -7  -1  -2    2.27    0.15 
   7  -2  -2    3.55    0.21 
   7   2   2    3.73    0.20 
   7  -2  -2    3.96    0.23 
   7   2   2    3.47    0.21 
   7   2   2    3.64    0.19 
   7  -2  -2    3.66    0.25 
  -7   2   2    3.69    0.22 
  -7   2   2    3.82    0.25 
  -7   2   2    3.97    0.22 
  -7  -2  -2    3.73    0.13 
  -7  -2  -2    3.56    0.24 
  -7  -2  -2    3.52    0.27 
  -7  -2  -2    3.66    0.20 
  -7   2   2    3.85    0.20 
  -7   2   2    3.23    0.21 
  -7   2   2    3.69    0.25 
   7   3   2    4.97    0.24 
   7  -3  -2    5.33    0.26 
   7  -3  -2    5.77    0.28 
   7   3   2    5.21    0.26 
   7  -3  -2    5.58    0.27 
   7   3   2    5.54    0.22 
  -7   3   2    5.73    0.26 
  -7   3   2    5.58    0.30 
  -7   3   2    5.24    0.27 
  -7   3   2    5.63    0.31 
  -7   3   2    5.70    0.26 
  -7   3   2    5.20    0.27 
  -7  -3  -2    5.25    0.28 
  -7  -3  -2    5.02    0.29 
  -7  -3  -2    5.36    0.15 
  -7  -3  -2    5.15    0.23 
   7  -4  -2    7.92    0.35 
   7   4   2    8.36    0.33 
   7  -4  -2    8.51    0.34 
   7  -4  -2    7.93    0.33 
   7   4   2    8.17    0.30 
   7   4   2    8.74    0.29 
  -7   4   2    7.75    0.34 
  -7  -4  -2    7.61    0.33 
  -7   4   2    8.62    0.34 
  -7   4   2    7.60    0.34 
  -7   4   2    7.85    0.37 
  -7  -4  -2    7.94    0.31 
  -7   4   2    8.30    0.34 
  -7  -4  -2    7.93    0.29 
  -7   4   2    7.49    0.37 
   7   5   2   25.59    0.68 
   7   5   2   25.28    0.70 
   7   5   2   24.98    0.73 
   7  -5  -2   25.43    0.75 
   7  -5  -2   24.90    0.73 
   7  -5  -2   25.41    0.78 
  -7   5   2   25.71    0.80 
  -7   5   2   25.68    0.75 
  -7   5   2   26.16    0.81 
  -7  -5  -2   26.66    0.70 
  -7   5   2   24.82    0.77 
  -7   5   2   26.16    0.78 
  -7   5   2   25.05    0.77 
  -7  -5  -2   25.57    0.71 
  -7  -5  -2   24.57    0.73 
   7  -6  -2    8.35    0.33 
   7  -6  -2    7.95    0.34 
   7   6   2    8.46    0.33 
   7   6   2    8.11    0.30 
   7   6   2    8.24    0.29 
   7  -6  -2    8.12    0.38 
  -7   6   2    8.37    0.40 
  -7   6   2    7.72    0.39 
  -7  -6  -2    6.99    0.39 
  -7   6   2    8.30    0.37 
  -7   6   2    8.36    0.39 
  -7   6   2    8.31    0.40 
  -7   6   2    8.04    0.35 
  -7  -6  -2    8.28    0.29 
   7   7   2   54.33    1.33 
   7  -7  -2   49.48    1.44 
   7   7   2   53.90    1.38 
   7   7   2   54.40    1.33 
   7  -7  -2   53.53    1.38 
   7  -7  -2   54.14    1.36 
  -7   7   2   52.94    1.46 
  -7   7   2   53.99    1.46 
  -7  -7  -2   52.17    1.33 
  -7   7   2   52.81    1.41 
  -7   7   2   52.35    1.44 
  -7   7   2   52.58    1.44 
  -7   7   2   51.63    1.45 
  -7  -7  -2   52.05    1.33 
  -7  -7  -2   54.09    1.31 
   7   8   2    0.68    0.07 
   7   8   2    0.63    0.13 
   7  -8  -2    0.84    0.14 
   7   8   2    0.84    0.11 
   7  -8  -2    0.88    0.12 
   7   8   2    0.77    0.11 
  -7   8   2    0.99    0.16 
  -7   8   2    0.71    0.26 
  -7   8   2    0.63    0.16 
  -7   8   2    0.95    0.18 
  -7  -8  -2    0.69    0.09 
  -7   8   2    0.62    0.19 
  -7   8   2    0.65    0.17 
  -7  -8  -2    0.83    0.11 
  -7  -8  -2    0.74    0.08 
   7   9   2    8.70    0.31 
   7  -9  -2    8.75    0.35 
   7   9   2    8.46    0.27 
   7   9   2    8.18    0.36 
   7  -9  -2    8.54    0.33 
  -7   9   2    8.22    0.47 
  -7   9   2    8.21    0.44 
  -7   9   2    7.95    0.43 
  -7   9   2    8.02    0.43 
  -7   9   2    9.14    0.42 
  -7  -9  -2    8.60    0.25 
  -7   9   2    8.89    0.45 
   7  10   2   10.71    0.43 
   7  10   2   10.35    0.38 
   7 -10  -2   10.57    0.53 
   7  10   2   10.65    0.33 
   7 -10  -2   10.62    0.37 
   7 -10  -2   10.07    0.38 
   7  10   2   10.32    0.35 
  -7  10   2    9.81    0.51 
  -7  10   2   10.60    0.55 
  -7  10   2   10.54    0.51 
  -7  10   2   11.16    0.52 
  -7  10   2   10.22    0.51 
  -7  10   2   10.44    0.48 
   7  11   2   12.36    0.41 
   7  11   2   13.25    0.41 
   7 -11  -2   12.76    0.41 
   7 -11  -2   12.42    0.59 
   7 -11  -2   13.33    0.41 
   7  11   2   13.21    0.49 
   7  11   2   12.85    0.46 
  -7  11   2   12.87    0.59 
  -7  11   2   13.48    0.64 
  -7  11   2   12.64    0.57 
  -7  11   2   13.20    0.60 
  -7  11   2   13.48    0.56 
  -7  11   2   12.16    0.61 
   7  12   2    3.56    0.24 
   7  12   2    4.40    0.32 
   7  12   2    3.82    0.23 
   7 -12  -2    3.82    0.18 
   7  12   2    3.93    0.32 
  -7  12   2    3.58    0.39 
  -7  12   2    4.36    0.41 
  -7  12   2    4.95    0.49 
  -7  12   2    3.57    0.37 
  -7  12   2    3.87    0.41 
   7  13   2    5.05    0.26 
   7  13   2    4.54    0.30 
   7  13   2    5.37    0.37 
   7  13   2    4.60    0.37 
  -7  13   2    4.80    0.55 
  -7  13   2    5.84    0.48 
  -7  13   2    5.12    0.45 
  -7  13   2    5.33    0.55 
  -7  13   2    5.01    0.44 
   7  14   2    9.20    0.49 
   7  14   2    9.16    0.43 
   7  14   2    9.35    0.50 
  -7  14   2    9.66    0.73 
  -7  14   2    8.35    0.67 
  -7  14   2    9.66    0.53 
   7  15   2    1.40    0.41 
   7  15   2    2.10    0.29 
  -7  15   2    1.55    0.41 
  -7  15   2    2.59    0.31 
   8  14  -2    0.78    0.27 
  -8  14  -2    0.94    0.36 
  -8  14  -2    0.22    0.37 
  -8  14  -2    0.32    0.39 
  -8  14  -2    0.49    0.32 
   8  13  -2   13.52    0.50 
   8  13  -2   14.17    0.60 
   8  13  -2   13.43    0.48 
  -8  13  -2   13.13    0.71 
  -8  13  -2   13.74    0.78 
  -8  13  -2   13.99    0.81 
  -8  13  -2   13.17    0.72 
   8  12  -2    5.08    0.20 
   8  12  -2    5.44    0.21 
   8  12  -2    5.53    0.31 
   8 -12   2    5.34    0.30 
   8  12  -2    5.40    0.32 
  -8  12  -2    5.23    0.51 
  -8  12  -2    5.74    0.53 
  -8  12  -2    4.36    0.55 
  -8  12  -2    5.02    0.52 
  -8  12  -2    5.50    0.56 
   8 -11   2    2.04    0.23 
   8  11  -2    2.48    0.25 
   8 -11   2    1.96    0.20 
   8  11  -2    2.21    0.25 
  -8  11  -2    2.19    0.35 
  -8  11  -2    1.55    0.26 
  -8  11  -2    2.24    0.32 
  -8  11  -2    1.72    0.28 
  -8  11  -2    1.88    0.29 
  -8  11  -2    2.24    0.29 
   8  10  -2    2.14    0.23 
   8 -10   2    1.83    0.20 
   8  10  -2    1.78    0.18 
   8 -10   2    1.98    0.23 
   8 -10   2    1.72    0.27 
  -8 -10   2    1.98    0.17 
  -8  10  -2    1.87    0.24 
  -8 -10   2    2.02    0.13 
  -8  10  -2    1.77    0.28 
  -8  10  -2    1.88    0.30 
  -8  10  -2    2.21    0.27 
  -8  10  -2    1.76    0.26 
   8   9  -2    0.72    0.14 
   8   9  -2    0.72    0.13 
   8  -9   2    0.70    0.15 
   8  -9   2    0.63    0.16 
   8  -9   2    0.50    0.19 
  -8   9  -2    0.88    0.21 
  -8   9  -2    0.70    0.20 
  -8   9  -2    0.93    0.19 
  -8  -9   2    0.90    0.12 
  -8  -9   2    0.69    0.08 
  -8   9  -2    1.12    0.24 
  -8   9  -2    0.58    0.23 
   8   8  -2    8.70    0.34 
   8  -8   2    8.19    0.39 
   8  -8   2    8.46    0.43 
   8   8  -2    8.68    0.35 
   8  -8   2    8.17    0.37 
  -8   8  -2    7.66    0.44 
  -8   8  -2    7.54    0.47 
  -8   8  -2    8.71    0.43 
  -8  -8   2    7.97    0.34 
  -8   8  -2    8.76    0.47 
  -8  -8   2    8.43    0.29 
  -8   8  -2    7.89    0.43 
   8  -7   2   38.74    1.07 
   8   7  -2   38.09    1.03 
   8  -7   2   38.19    1.08 
   8   7  -2   38.00    1.03 
   8   7  -2   39.83    1.06 
   8  -7   2   38.87    1.12 
  -8   7  -2   39.82    1.13 
  -8   7  -2   38.57    1.14 
  -8  -7   2   39.95    0.99 
  -8  -7   2   39.92    1.01 
  -8   7  -2   36.28    1.41 
  -8  -7   2   40.56    1.06 
  -8   7  -2   34.94    1.30 
   8   6  -2   33.48    0.91 
   8   6  -2   33.82    0.91 
   8  -6   2   32.85    0.96 
   8  -6   2   31.96    0.98 
   8   6  -2   32.42    0.93 
   8  -6   2   34.06    0.95 
  -8   6  -2   34.28    1.00 
  -8   6  -2   33.50    0.98 
  -8  -6   2   34.00    0.87 
  -8   6  -2   34.52    1.02 
  -8   6  -2   34.10    1.05 
  -8  -6   2   34.37    0.94 
  -8   6  -2   32.37    0.98 
  -8  -6   2   33.06    0.90 
   8  -5   2   18.70    0.63 
   8  -5   2   18.50    0.61 
   8   5  -2   18.66    0.58 
   8   5  -2   19.24    0.59 
   8   5  -2   19.10    0.60 
   8  -5   2   18.74    0.64 
  -8   5  -2   19.30    0.65 
  -8  -5   2   20.21    0.62 
  -8  -5   2   19.91    0.59 
  -8   5  -2   19.18    0.64 
  -8   5  -2   18.95    0.65 
  -8   5  -2   19.49    0.71 
  -8   5  -2   19.52    0.67 
  -8  -5   2   19.11    0.55 
   8   4  -2   27.72    0.77 
   8  -4   2   26.77    0.81 
   8  -4   2   26.94    0.82 
   8  -4   2   26.43    0.80 
   8   4  -2   27.85    0.78 
   8   4  -2   27.82    0.78 
   8  -4   2   27.76    0.83 
  -8   4  -2   26.96    0.88 
  -8   4  -2   26.87    0.82 
  -8   4  -2   27.07    0.82 
  -8  -4   2   27.18    0.79 
  -8  -4   2   27.98    0.75 
  -8   4  -2   26.48    0.84 
  -8  -4   2   27.68    0.81 
  -8   4  -2   27.27    0.82 
   8  -3   2   27.89    0.80 
   8  -3   2   27.34    0.82 
   8   3  -2   26.81    0.77 
   8  -3   2   27.20    0.80 
   8   3  -2   28.10    0.77 
   8  -3   2   27.37    0.80 
   8   3  -2   23.98    0.82 
  -8   3  -2   26.23    0.80 
  -8  -3   2   27.32    0.75 
  -8   3  -2   27.86    0.84 
  -8  -3   2   27.09    0.79 
  -8   3  -2   27.32    0.87 
  -8   3  -2   27.08    0.81 
  -8  -3   2   27.64    0.81 
  -8   3  -2   26.84    0.80 
   8   2  -2    7.89    0.43 
   8  -2   2    7.73    0.39 
   8  -2   2    8.81    0.37 
   8   2  -2    8.49    0.34 
   8   2  -2    8.49    0.35 
   8  -2   2    8.94    0.37 
   8  -2   2    8.98    0.36 
  -8   2  -2    8.88    0.36 
  -8  -2   2    8.14    0.32 
  -8   2  -2    8.88    0.43 
  -8  -2   2    9.03    0.38 
  -8  -2   2    8.79    0.38 
  -8   2  -2    8.31    0.38 
  -8   2  -2    8.59    0.35 
   8  -1   2   23.44    0.70 
   8  -1   2   23.40    0.72 
   8   1  -2   22.62    0.69 
   8  -1   2   23.53    0.69 
   8  -1   2   22.69    0.70 
   8   1  -2   22.56    0.71 
   8   1  -2   23.71    0.69 
  -8   1  -2   22.79    0.76 
  -8  -1   2   22.66    0.73 
  -8  -1   2   23.69    0.59 
  -8   1  -2   23.05    0.68 
  -8  -1   2   23.31    0.68 
  -8   1  -2   24.36    0.74 
  -8  -1   2   22.75    0.72 
  -8   1  -2   23.53    0.70 
   8   0  -2    3.21    0.22 
   8   0   2    3.21    0.21 
   8   0  -2    3.57    0.22 
   8   0   2    3.33    0.22 
   8   0   2    3.11    0.22 
   8   0  -2    3.32    0.23 
   8   0  -2    3.15    0.22 
   8   0   2    3.00    0.23 
  -8   0  -2    3.30    0.28 
  -8   0  -2    3.05    0.20 
  -8   0  -2    3.11    0.23 
  -8   0   2    3.11    0.25 
  -8   0   2    3.15    0.24 
  -8   0   2    3.27    0.21 
  -8   0  -2    3.33    0.21 
  -8   0   2    3.53    0.16 
  -8   0   2    3.14    0.24 
   8  -1  -2   22.51    0.69 
   8  -1  -2   23.03    0.70 
   8   1   2   23.18    0.69 
   8   1   2   23.48    0.67 
   8   1   2   23.21    0.70 
   8  -1  -2   23.13    0.70 
   8   1   2   22.72    0.68 
  -8   1   2   22.05    0.69 
  -8   1   2   23.23    0.64 
  -8  -1  -2   22.90    0.65 
  -8   1   2   22.99    0.74 
  -8  -1  -2   24.31    0.69 
  -8  -1  -2   24.03    0.72 
  -8  -1  -2   22.28    0.73 
  -8  -1  -2   22.83    0.59 
  -8   1   2   22.03    0.68 
  -8   1   2   22.76    0.73 
   8  -2  -2    8.35    0.35 
   8   2   2    8.77    0.39 
   8   2   2    8.96    0.33 
   8  -2  -2    8.86    0.38 
   8   2   2    8.64    0.36 
   8   2   2    8.67    0.35 
   8  -2  -2    8.61    0.36 
  -8  -2  -2    8.10    0.36 
  -8  -2  -2    8.93    0.40 
  -8   2   2    8.83    0.35 
  -8  -2  -2    8.98    0.34 
  -8   2   2    8.78    0.33 
  -8   2   2    8.85    0.36 
  -8  -2  -2    8.16    0.24 
  -8   2   2    8.97    0.41 
  -8   2   2    8.38    0.40 
  -8   2   2    8.18    0.35 
   8  -3  -2   27.49    0.81 
   8   3   2   27.08    0.80 
   8   3   2   28.21    0.76 
   8  -3  -2   28.02    0.83 
   8   3   2   25.08    0.80 
   8  -3  -2   27.22    0.80 
  -8   3   2   28.46    0.81 
  -8   3   2   27.47    0.82 
  -8  -3  -2   27.18    0.82 
  -8  -3  -2   28.13    0.80 
  -8   3   2   26.49    0.86 
  -8   3   2   27.95    0.86 
  -8  -3  -2   27.65    0.77 
  -8   3   2   28.17    0.82 
  -8   3   2   27.58    0.79 
   8   4   2   27.12    0.81 
   8  -4  -2   27.32    0.80 
   8   4   2   27.95    0.76 
   8  -4  -2   28.57    0.83 
   8   4   2   28.56    0.79 
   8  -4  -2   28.33    0.85 
  -8  -4  -2   28.64    0.80 
  -8   4   2   28.13    0.87 
  -8   4   2   25.52    0.82 
  -8   4   2   27.43    0.88 
  -8   4   2   27.42    0.81 
  -8  -4  -2   26.50    0.81 
  -8   4   2   28.59    0.84 
  -8   4   2   27.61    0.82 
  -8  -4  -2   27.86    0.77 
   8   5   2   19.80    0.62 
   8  -5  -2   19.10    0.65 
   8   5   2   19.83    0.56 
   8   5   2   19.48    0.58 
   8  -5  -2   18.70    0.60 
   8  -5  -2   19.08    0.63 
  -8   5   2   18.97    0.63 
  -8   5   2   18.64    0.68 
  -8  -5  -2   18.25    0.60 
  -8   5   2   19.03    0.64 
  -8   5   2   18.01    0.67 
  -8   5   2   18.67    0.64 
  -8   5   2   18.67    0.64 
  -8  -5  -2   19.01    0.58 
  -8  -5  -2   18.65    0.56 
   8  -6  -2   32.98    0.94 
   8   6   2   35.35    0.92 
   8   6   2   34.18    0.95 
   8   6   2   34.55    0.90 
   8  -6  -2   34.46    0.97 
  -8   6   2   33.84    0.98 
  -8  -6  -2   33.88    0.90 
  -8   6   2   32.17    0.99 
  -8   6   2   32.03    1.02 
  -8  -6  -2   34.23    0.91 
  -8   6   2   32.44    1.03 
  -8   6   2   33.50    1.00 
   8  -7  -2   40.39    1.10 
   8   7   2   39.80    1.09 
   8   7   2   40.46    1.03 
   8  -7  -2   40.32    1.07 
   8   7   2   39.18    1.04 
  -8  -7  -2   39.99    1.04 
  -8   7   2   39.97    1.20 
  -8  -7  -2   40.21    1.02 
  -8   7   2   35.61    1.15 
  -8   7   2   38.35    1.12 
  -8   7   2   37.98    1.15 
   8  -8  -2    8.70    0.39 
   8   8   2    8.21    0.37 
   8   8   2    8.10    0.33 
   8  -8  -2    8.15    0.35 
   8   8   2    8.54    0.33 
  -8   8   2    8.57    0.46 
  -8   8   2    8.00    0.53 
  -8  -8  -2    8.60    0.29 
  -8  -8  -2    8.69    0.33 
  -8  -8  -2    7.92    0.31 
  -8   8   2    6.77    0.58 
  -8   8   2    8.63    0.42 
  -8   8   2    8.23    0.45 
   8   9   2    0.88    0.15 
   8   9   2    0.96    0.14 
   8   9   2    0.69    0.12 
   8  -9  -2    0.78    0.14 
   8  -9  -2    1.11    0.17 
  -8   9   2    0.67    0.20 
  -8   9   2    0.62    0.20 
  -8   9   2    0.76    0.19 
  -8  -9  -2    0.88    0.12 
  -8   9   2    0.63    0.17 
  -8  -9  -2    0.68    0.09 
  -8   9   2    0.55    0.18 
  -8  -9  -2    0.77    0.08 
  -8   9   2    0.70    0.36 
   8 -10  -2    2.05    0.23 
   8  10   2    1.84    0.21 
   8 -10  -2    1.60    0.19 
   8  10   2    1.93    0.21 
   8 -10  -2    2.27    0.29 
   8  10   2    1.75    0.17 
  -8  10   2    1.93    0.30 
  -8  10   2    1.69    0.24 
  -8 -10  -2    1.78    0.10 
  -8 -10  -2    1.71    0.09 
  -8  10   2    1.19    0.24 
  -8  10   2    1.25    0.44 
  -8  10   2    1.36    0.22 
  -8  10   2    1.98    0.27 
   8  11   2    1.84    0.15 
   8 -11  -2    2.06    0.23 
   8  11   2    2.26    0.25 
   8  11   2    2.06    0.22 
   8 -11  -2    2.10    0.25 
   8  11   2    2.22    0.24 
  -8  11   2    2.02    0.31 
  -8  11   2    2.10    0.29 
  -8  11   2    1.65    0.32 
  -8  11   2    2.26    0.33 
  -8  11   2    2.35    0.29 
   8  12   2    5.32    0.38 
   8 -12  -2    4.84    0.27 
   8  12   2    5.17    0.35 
   8  12   2    5.02    0.23 
   8  12   2    5.16    0.30 
  -8  12   2    4.71    0.51 
  -8  12   2    5.62    0.48 
  -8  12   2    5.41    0.49 
  -8  12   2    5.35    0.55 
   8  13   2   13.46    0.48 
   8  13   2   14.16    0.56 
   8  13   2   13.77    0.57 
  -8  13   2   14.55    0.68 
  -8  13   2   13.29    0.79 
  -8  13   2   12.40    0.74 
   8  14   2    0.66    0.25 
   8  14   2    1.09    0.26 
  -8  14   2    0.96    0.29 
  -8  14   2    1.64    0.42 
  -8  14   2    0.57    0.37 
   9  13  -2    1.01    0.26 
   9  13  -2    0.75    0.22 
  -9  13  -2    0.45    0.42 
  -9  13  -2    0.55    0.33 
  -9  13  -2    0.18    0.35 
  -9  13  -2    0.84    0.36 
   9 -12   2   11.53    0.47 
   9 -12   2   10.60    0.49 
   9  12  -2   11.23    0.47 
   9  12  -2   10.62    0.46 
  -9  12  -2   10.11    0.67 
  -9  12  -2   11.40    0.72 
  -9  12  -2   10.11    0.65 
  -9  12  -2   10.37    0.67 
  -9  12  -2   10.47    0.71 
   9  11  -2    2.43    0.23 
   9 -11   2    2.57    0.25 
   9 -11   2    2.34    0.23 
   9  11  -2    2.30    0.23 
  -9  11  -2    2.17    0.36 
  -9  11  -2    2.03    0.33 
  -9  11  -2    2.60    0.38 
  -9  11  -2    1.93    0.31 
  -9  11  -2    2.05    0.33 
  -9 -11   2    2.58    0.17 
   9  10  -2    1.30    0.18 
   9 -10   2    1.63    0.21 
   9 -10   2    1.32    0.20 
   9  10  -2    1.22    0.18 
  -9  10  -2    0.79    0.24 
  -9  10  -2    1.05    0.28 
  -9  10  -2    1.14    0.40 
  -9  10  -2    1.54    0.27 
  -9 -10   2    1.22    0.15 
  -9  10  -2    1.31    0.29 
  -9  10  -2    1.54    0.27 
   9   9  -2    2.07    0.20 
   9   9  -2    2.05    0.25 
   9   9  -2    2.10    0.22 
   9  -9   2    2.14    0.23 
   9  -9   2    2.08    0.22 
   9  -9   2    2.49    0.28 
  -9   9  -2    2.24    0.29 
  -9   9  -2    2.73    0.31 
  -9  -9   2    2.18    0.16 
  -9   9  -2    2.36    0.31 
  -9   9  -2    2.77    0.34 
  -9   9  -2    2.24    0.30 
   9   8  -2    6.80    0.34 
   9   8  -2    6.67    0.33 
   9  -8   2    5.81    0.36 
   9  -8   2    6.73    0.40 
   9  -8   2    6.70    0.43 
   9   8  -2    7.24    0.37 
  -9   8  -2    7.42    0.46 
  -9   8  -2    7.66    0.44 
  -9   8  -2    6.89    0.45 
  -9  -8   2    6.34    0.37 
  -9   8  -2    6.74    0.48 
  -9   8  -2    6.91    0.43 
  -9  -8   2    5.85    0.32 
   9   7  -2    0.87    0.15 
   9   7  -2    0.93    0.15 
   9  -7   2    0.70    0.18 
   9   7  -2    0.81    0.15 
   9  -7   2    0.81    0.16 
   9  -7   2    0.91    0.21 
  -9  -7   2    0.93    0.14 
  -9   7  -2    0.60    0.19 
  -9   7  -2    1.02    0.21 
  -9   7  -2    0.55    0.22 
  -9   7  -2    0.76    0.17 
  -9  -7   2    0.60    0.14 
  -9  -7   2    0.80    0.13 
  -9   7  -2    0.82    0.19 
   9  -6   2   44.54    1.24 
   9  -6   2   44.52    1.28 
   9  -6   2   45.38    1.25 
   9   6  -2   45.88    1.22 
   9   6  -2   44.87    1.20 
   9   6  -2   45.11    1.20 
  -9   6  -2   44.27    1.35 
  -9   6  -2   46.30    1.28 
  -9   6  -2   44.34    1.27 
  -9   6  -2   42.00    1.33 
  -9   6  -2   45.65    1.31 
  -9  -6   2   45.44    1.23 
  -9  -6   2   42.68    1.19 
  -9  -6   2   46.26    1.19 
   9  -5   2    8.76    0.40 
   9   5  -2    8.51    0.38 
   9   5  -2    8.53    0.37 
   9   5  -2    8.43    0.36 
   9  -5   2    8.81    0.42 
   9  -5   2    8.66    0.41 
  -9  -5   2    8.89    0.40 
  -9   5  -2    8.75    0.49 
  -9   5  -2    8.33    0.44 
  -9  -5   2    7.15    0.43 
  -9  -5   2    9.01    0.38 
  -9   5  -2    8.72    0.43 
   9   4  -2    3.30    0.24 
   9  -4   2    3.53    0.28 
   9   4  -2    3.79    0.24 
   9  -4   2    3.16    0.28 
   9   4  -2    3.08    0.25 
   9  -4   2    3.38    0.26 
   9  -4   2    3.96    0.29 
  -9  -4   2    3.83    0.28 
  -9  -4   2    2.93    0.24 
  -9   4  -2    3.57    0.31 
  -9   4  -2    3.45    0.36 
  -9  -4   2    3.50    0.27 
  -9   4  -2    3.28    0.29 
   9   3  -2  100.75    2.48 
   9   3  -2   99.37    2.47 
   9  -3   2   98.20    2.52 
   9  -3   2   99.94    2.51 
   9  -3   2  101.09    2.51 
   9   3  -2  101.62    2.48 
   9  -3   2   94.59    2.49 
  -9  -3   2   99.16    2.49 
  -9  -3   2  104.38    2.53 
  -9   3  -2   99.04    2.58 
  -9   3  -2  100.53    2.50 
  -9   3  -2  100.25    2.55 
  -9  -3   2   98.50    2.45 
   9   2  -2    3.50    0.24 
   9  -2   2    2.99    0.24 
   9  -2   2    3.56    0.27 
   9   2  -2    3.46    0.25 
   9  -2   2    3.14    0.25 
   9   2  -2    3.41    0.26 
   9  -2   2    3.56    0.27 
   9   2  -2    3.95    0.25 
  -9  -2   2    3.48    0.28 
  -9   2  -2    3.13    0.25 
  -9  -2   2    3.17    0.27 
  -9   2  -2    3.36    0.33 
  -9   2  -2    2.87    0.27 
  -9   2  -2    2.53    0.23 
  -9  -2   2    3.39    0.22 
   9  -1   2    1.46    0.18 
   9  -1   2    1.29    0.17 
   9   1  -2    1.79    0.19 
   9  -1   2    1.46    0.18 
   9   1  -2    1.42    0.17 
   9   1  -2    1.20    0.16 
   9  -1   2    1.68    0.18 
   9   1  -2    1.06    0.15 
  -9   1  -2    1.47    0.21 
  -9  -1   2    1.49    0.10 
  -9  -1   2    1.72    0.21 
  -9   1  -2    1.80    0.20 
  -9   1  -2    1.38    0.18 
  -9  -1   2    1.50    0.18 
  -9  -1   2    1.39    0.19 
  -9   1  -2    1.83    0.20 
   9   0  -2   16.26    0.56 
   9   0  -2   16.78    0.57 
   9   0   2   13.33    0.67 
   9   0   2   17.08    0.57 
   9   0   2   16.07    0.56 
   9   0  -2   17.24    0.57 
   9   0   2   15.99    0.58 
  -9   0  -2   16.66    0.55 
  -9   0   2   16.29    0.60 
  -9   0  -2   17.13    0.63 
  -9   0   2   16.99    0.47 
  -9   0   2   17.30    0.56 
  -9   0  -2   17.44    0.60 
  -9   0   2   15.51    0.60 
  -9   0  -2   16.25    0.53 
   9  -1  -2    1.53    0.18 
   9   1   2    1.21    0.17 
   9  -1  -2    1.65    0.19 
   9   1   2    1.30    0.16 
   9   1   2    1.30    0.17 
   9   1   2    1.67    0.19 
   9  -1  -2    1.43    0.17 
  -9  -1  -2    1.20    0.17 
  -9  -1  -2    1.51    0.21 
  -9   1   2    1.17    0.16 
  -9  -1  -2    1.39    0.16 
  -9   1   2    1.28    0.18 
  -9   1   2    1.55    0.17 
  -9   1   2    1.62    0.16 
  -9   1   2    1.20    0.18 
  -9  -1  -2    1.49    0.17 
  -9  -1  -2    1.44    0.11 
   9  -2  -2    2.85    0.24 
   9   2   2    2.69    0.25 
   9   2   2    2.96    0.24 
   9   2   2    2.83    0.21 
   9  -2  -2    2.85    0.25 
   9   2   2    2.88    0.23 
   9  -2  -2    3.23    0.27 
  -9   2   2    3.33    0.22 
  -9   2   2    3.35    0.25 
  -9  -2  -2    3.19    0.12 
  -9   2   2    3.42    0.31 
  -9   2   2    3.76    0.30 
  -9  -2  -2    3.14    0.22 
  -9  -2  -2    2.85    0.25 
  -9  -2  -2    3.12    0.29 
  -9   2   2    3.11    0.25 
  -9  -2  -2    3.35    0.14 
   9  -3  -2  100.71    2.51 
   9   3   2  100.32    2.48 
   9  -3  -2   96.61    2.49 
   9  -3  -2  102.24    2.53 
   9   3   2  101.94    2.45 
   9   3   2   99.85    2.48 
   9   3   2   99.06    2.50 
  -9   3   2  100.64    2.47 
  -9   3   2   96.45    2.50 
  -9   3   2   98.23    2.51 
  -9   3   2  103.44    2.58 
  -9  -3  -2   99.18    2.46 
  -9   3   2  101.75    2.56 
  -9  -3  -2   98.49    2.52 
  -9  -3  -2  100.78    2.50 
   9   4   2    3.15    0.25 
   9   4   2    3.45    0.23 
   9   4   2    2.89    0.26 
   9  -4  -2    3.30    0.27 
   9  -4  -2    3.73    0.27 
   9  -4  -2    3.18    0.28 
   9   4   2    3.42    0.25 
  -9  -4  -2    3.10    0.28 
  -9  -4  -2    3.40    0.22 
  -9   4   2    3.38    0.28 
  -9   4   2    3.29    0.33 
  -9   4   2    3.02    0.32 
  -9   4   2    3.65    0.28 
  -9  -4  -2    3.72    0.25 
  -9   4   2    3.16    0.27 
   9  -5  -2    9.07    0.44 
   9  -5  -2    8.53    0.40 
   9  -5  -2    8.40    0.41 
   9   5   2    8.58    0.37 
   9   5   2    9.09    0.35 
   9   5   2    8.98    0.40 
   9   5   2    8.45    0.37 
  -9   5   2    8.43    0.51 
  -9  -5  -2    8.00    0.40 
  -9   5   2    9.04    0.47 
  -9   5   2    8.33    0.41 
  -9  -5  -2    8.91    0.35 
  -9   5   2    8.19    0.46 
  -9  -5  -2    8.80    0.37 
   9   6   2   46.21    1.21 
   9   6   2   45.05    1.24 
   9   6   2   45.20    1.17 
   9   6   2   45.04    1.20 
   9  -6  -2   45.30    1.23 
   9  -6  -2   45.07    1.25 
  -9  -6  -2   44.34    1.22 
  -9   6   2   43.43    1.28 
  -9   6   2   44.10    1.28 
  -9   6   2   46.22    1.34 
  -9  -6  -2   45.80    1.19 
  -9  -6  -2   44.48    1.20 
  -9   6   2   45.26    1.32 
   9  -7  -2    1.18    0.17 
   9   7   2    0.75    0.14 
   9   7   2    0.93    0.14 
   9   7   2    0.79    0.17 
   9   7   2    0.91    0.15 
   9  -7  -2    0.77    0.18 
  -9   7   2    0.64    0.18 
  -9   7   2    0.98    0.23 
  -9  -7  -2    0.74    0.12 
  -9   7   2    0.87    0.20 
  -9  -7  -2    0.84    0.13 
  -9   7   2    0.68    0.20 
  -9   7   2    1.36    0.20 
  -9  -7  -2    0.79    0.13 
   9  -8  -2    6.72    0.36 
   9   8   2    7.12    0.34 
   9   8   2    7.18    0.32 
   9   8   2    7.17    0.38 
   9  -8  -2    7.32    0.39 
   9   8   2    6.53    0.34 
  -9   8   2    6.62    0.46 
  -9   8   2    7.20    0.49 
  -9  -8  -2    6.78    0.29 
  -9   8   2    7.12    0.46 
  -9   8   2    6.55    0.41 
  -9  -8  -2    7.04    0.31 
  -9   8   2    7.22    0.45 
   9   9   2    2.19    0.24 
   9   9   2    2.08    0.20 
   9   9   2    2.54    0.30 
   9  -9  -2    2.62    0.27 
   9   9   2    2.03    0.22 
   9  -9  -2    2.19    0.29 
   9  -9  -2    2.23    0.23 
  -9   9   2    1.97    0.26 
  -9  -9  -2    1.94    0.18 
  -9   9   2    2.72    0.31 
  -9   9   2    1.99    0.27 
  -9   9   2    2.23    0.29 
  -9   9   2    2.88    0.33 
  -9  -9  -2    2.36    0.17 
  -9  -9  -2    2.23    0.22 
  -9   9   2    1.77    0.25 
   9  10   2    1.13    0.29 
   9  10   2    1.43    0.19 
   9 -10  -2    1.26    0.20 
   9  10   2    1.22    0.18 
   9 -10  -2    1.31    0.19 
   9  10   2    1.13    0.37 
  -9  10   2    1.09    0.28 
  -9  10   2    1.11    0.27 
  -9  10   2    1.22    0.27 
  -9 -10  -2    1.44    0.13 
  -9  10   2    1.56    0.28 
   9 -11  -2    2.03    0.21 
   9  11   2    2.18    0.22 
   9  11   2    2.65    0.28 
   9  11   2    2.75    0.29 
   9  11   2    2.62    0.27 
   9 -11  -2    2.38    0.24 
  -9  11   2    2.53    0.37 
  -9  11   2    2.26    0.32 
  -9  11   2    2.14    0.33 
  -9  11   2    2.42    0.35 
   9  12   2   11.41    0.54 
   9  12   2    9.89    0.46 
   9  12   2   10.14    0.50 
   9  12   2   10.95    0.47 
   9 -12  -2   10.76    0.43 
  -9  12   2   11.05    0.75 
  -9  12   2   10.76    0.72 
  -9  12   2    9.89    0.66 
  -9  12   2   11.37    0.65 
   9  13   2    0.85    0.26 
   9  13   2    0.74    0.23 
  -9  13   2    0.87    0.32 
  -9  13   2    0.61    0.34 
  -9  13   2    1.10    0.40 
  10  12  -2    0.71    0.29 
  10  12  -2    1.12    0.24 
  10  12  -2    1.09    0.24 
 -10  12  -2    0.91    0.36 
 -10  12  -2    0.94    0.36 
 -10  12  -2    1.28    0.39 
  10  11  -2    4.07    0.44 
  10  11  -2    4.07    0.38 
  10 -11   2    4.54    0.41 
  10  11  -2    4.12    0.35 
 -10  11  -2    5.19    0.62 
 -10  11  -2    4.30    0.45 
 -10  11  -2    4.15    0.44 
 -10  11  -2    4.19    0.46 
  10  10  -2    8.53    0.48 
  10  10  -2    8.17    0.44 
  10 -10   2    8.77    0.48 
  10  10  -2    8.10    0.42 
 -10  10  -2    7.52    0.57 
 -10  10  -2    7.01    0.60 
 -10  10  -2    9.17    0.64 
 -10  10  -2    8.59    0.61 
 -10 -10   2    9.35    0.46 
  10   9  -2    5.23    0.37 
  10   9  -2    5.82    0.41 
  10   9  -2    5.82    0.36 
  10  -9   2    6.09    0.41 
 -10  -9   2    5.57    0.27 
 -10   9  -2    6.44    0.54 
 -10   9  -2    5.00    0.51 
 -10   9  -2    5.42    0.48 
 -10   9  -2    6.22    0.53 
 -10  -9   2    5.94    0.36 
  10   8  -2    0.23    0.16 
  10   8  -2    0.31    0.17 
  10  -8   2    0.10    0.19 
  10  -8   2    0.34    0.22 
  10   8  -2    0.31    0.15 
 -10   8  -2    0.53    0.24 
 -10   8  -2    0.18    0.20 
 -10  -8   2    0.47    0.11 
 -10   8  -2    0.23    0.21 
 -10  -8   2    0.39    0.13 
 -10   8  -2    0.13    0.23 
 -10   8  -2    0.11    0.20 
  10  -7   2   12.96    0.55 
  10  -7   2   13.66    0.61 
  10   7  -2   13.51    0.50 
  10   7  -2   12.96    0.54 
  10   7  -2   12.86    0.52 
 -10   7  -2   13.17    0.61 
 -10   7  -2   14.23    0.64 
 -10  -7   2   13.73    0.49 
 -10  -7   2   14.20    0.45 
 -10   7  -2   13.70    0.58 
 -10   7  -2   13.77    0.68 
  10   6  -2    0.29    0.15 
  10  -6   2    0.32    0.17 
  10   6  -2    0.14    0.15 
  10   6  -2    0.26    0.13 
  10  -6   2    0.26    0.18 
 -10  -6   2    0.09    0.14 
 -10   6  -2    0.03    0.22 
 -10  -6   2    0.21    0.10 
 -10   6  -2    0.07    0.19 
 -10   6  -2    0.23    0.17 
 -10   6  -2   -0.06    0.14 
  10  -5   2   15.54    0.61 
  10  -5   2   15.03    0.58 
  10   5  -2   15.03    0.54 
  10   5  -2   15.14    0.55 
  10   5  -2   14.44    0.55 
 -10   5  -2   15.20    0.64 
 -10   5  -2   14.28    0.67 
 -10   5  -2   14.61    0.59 
 -10  -5   2   15.67    0.50 
 -10  -5   2   15.81    0.56 
  10   4  -2   35.58    1.03 
  10  -4   2   35.26    1.06 
  10   4  -2   35.97    1.02 
  10   4  -2   35.61    1.02 
  10  -4   2   36.39    1.07 
 -10   4  -2   34.29    1.10 
 -10   4  -2   35.15    1.14 
 -10  -4   2   35.65    1.04 
 -10  -4   2   36.02    0.98 
 -10   4  -2   36.62    1.06 
  10  -3   2   17.22    0.64 
  10   3  -2   19.12    0.63 
  10   3  -2   18.05    0.62 
  10  -3   2   17.55    0.65 
  10   3  -2   17.34    0.61 
  10   3  -2   18.15    0.62 
  10  -3   2   18.43    0.65 
 -10   3  -2   18.18    0.73 
 -10   3  -2   17.41    0.68 
 -10   3  -2   18.02    0.63 
 -10  -3   2   18.43    0.65 
 -10  -3   2   18.36    0.59 
  10   2  -2    3.95    0.30 
  10   2  -2    4.14    0.29 
  10   2  -2    3.98    0.31 
  10   2  -2    4.06    0.29 
  10  -2   2    4.08    0.31 
  10  -2   2    3.77    0.30 
  10  -2   2    3.29    0.37 
 -10   2  -2    4.39    0.30 
 -10   2  -2    4.17    0.40 
 -10   2  -2    2.95    0.38 
 -10   2  -2    3.45    0.32 
 -10  -2   2    4.51    0.34 
 -10  -2   2    4.42    0.27 
  10   1  -2   17.88    0.61 
  10  -1   2   17.71    0.66 
  10  -1   2   18.13    0.61 
  10   1  -2   18.20    0.63 
  10   1  -2   18.22    0.63 
  10   1  -2   18.00    0.61 
  10  -1   2   16.52    0.61 
 -10   1  -2   17.38    0.70 
 -10   1  -2   18.96    0.62 
 -10   1  -2   17.47    0.59 
 -10  -1   2   18.03    0.66 
 -10  -1   2   18.11    0.47 
 -10   1  -2   17.40    0.66 
 -10  -1   2   17.35    0.59 
  10   0   2   23.70    0.74 
  10   0  -2   23.40    0.75 
  10   0   2   23.10    0.72 
  10   0   2   22.47    0.74 
  10   0   2   22.66    0.75 
  10   0  -2   22.64    0.74 
  10   0  -2   21.29    0.74 
 -10   0   2   22.92    0.78 
 -10   0  -2   22.03    0.80 
 -10   0  -2   23.15    0.73 
 -10   0  -2   22.86    0.62 
 -10   0  -2   22.88    0.70 
 -10   0   2   22.92    0.62 
 -10   0   2   22.62    0.72 
 -10   0   2   22.42    0.79 
  10   1   2   17.55    0.62 
  10   1   2   17.68    0.59 
  10   1   2   16.73    0.63 
  10   1   2   16.91    0.61 
  10  -1  -2   18.03    0.64 
 -10  -1  -2   17.66    0.50 
 -10  -1  -2   17.88    0.57 
 -10   1   2   17.24    0.61 
 -10  -1  -2   17.51    0.60 
 -10  -1  -2   17.46    0.48 
 -10   1   2   17.65    0.68 
 -10   1   2   18.35    0.53 
 -10   1   2   18.26    0.61 
 -10   1   2   18.11    0.68 
 -10  -1  -2   18.09    0.69 
  10  -2  -2    4.55    0.33 
  10   2   2    4.56    0.30 
  10   2   2    4.12    0.28 
  10   2   2    4.21    0.31 
  10  -2  -2    3.79    0.31 
  10   2   2    4.30    0.30 
 -10   2   2    3.79    0.30 
 -10   2   2    4.05    0.25 
 -10  -2  -2    3.58    0.35 
 -10   2   2    3.88    0.36 
 -10   2   2    3.29    0.29 
 -10   2   2    3.46    0.35 
 -10  -2  -2    3.73    0.13 
 -10  -2  -2    4.00    0.27 
 -10  -2  -2    3.97    0.15 
  10   3   2   17.01    0.60 
  10  -3  -2   17.30    0.61 
  10   3   2   18.19    0.61 
  10   3   2   15.59    0.63 
  10  -3  -2   17.85    0.65 
  10   3   2   17.21    0.62 
 -10  -3  -2   18.44    0.58 
 -10   3   2   17.42    0.58 
 -10   3   2   17.77    0.69 
 -10   3   2   15.68    0.80 
 -10   3   2   16.22    0.62 
 -10   3   2   17.60    0.69 
 -10  -3  -2   17.14    0.65 
  10  -4  -2   35.69    1.04 
  10   4   2   37.87    1.04 
  10   4   2   36.20    1.03 
  10   4   2   36.02    1.05 
  10  -4  -2   35.18    1.08 
 -10  -4  -2   35.20    1.07 
 -10   4   2   35.78    1.03 
 -10  -4  -2   36.64    1.00 
 -10   4   2   36.86    1.07 
 -10   4   2   35.69    1.13 
 -10   4   2   34.10    1.12 
  10   5   2   14.37    0.55 
  10   5   2   16.08    0.55 
  10   5   2   14.94    0.57 
  10  -5  -2   14.90    0.57 
  10   5   2   15.81    0.56 
  10  -5  -2   15.34    0.62 
 -10  -5  -2   15.36    0.52 
 -10   5   2   14.98    0.66 
 -10  -5  -2   14.75    0.58 
 -10   5   2   15.61    0.59 
 -10   5   2   15.92    0.61 
 -10   5   2   14.35    0.65 
  10   6   2    0.19    0.15 
  10   6   2    0.07    0.15 
  10  -6  -2    0.29    0.16 
  10  -6  -2    0.15    0.18 
  10   6   2    0.24    0.15 
  10   6   2    0.08    0.15 
 -10  -6  -2    0.41    0.12 
 -10   6   2    0.43    0.18 
 -10   6   2    0.08    0.18 
 -10  -6  -2    0.40    0.17 
 -10   6   2    0.27    0.21 
 -10   6   2    0.52    0.20 
  10  -7  -2   14.32    0.64 
  10   7   2   13.65    0.52 
  10   7   2   13.56    0.52 
  10  -7  -2   14.14    0.55 
  10   7   2   11.92    0.65 
 -10  -7  -2   13.41    0.52 
 -10   7   2   13.46    0.61 
 -10  -7  -2   12.94    0.48 
 -10   7   2   14.42    0.61 
 -10   7   2   13.95    0.67 
 -10   7   2   13.14    0.64 
  10  -8  -2    0.42    0.17 
  10   8   2    0.29    0.17 
  10   8   2    0.49    0.15 
  10   8   2    0.15    0.16 
  10   8   2    0.18    0.17 
 -10  -8  -2    0.13    0.12 
 -10   8   2    0.26    0.23 
 -10   8   2    0.30    0.24 
 -10   8   2    0.25    0.21 
 -10   8   2    0.34    0.25 
 -10  -8  -2   -0.08    0.11 
  10   9   2    5.85    0.39 
  10   9   2    5.60    0.37 
  10  -9  -2    5.92    0.37 
  10   9   2    5.35    0.38 
  10   9   2    5.58    0.35 
 -10   9   2    6.55    0.58 
 -10   9   2    5.81    0.47 
 -10   9   2    5.57    0.50 
 -10   9   2    5.99    0.51 
  10  10   2    8.14    0.42 
  10  10   2    8.06    0.49 
  10 -10  -2    8.50    0.44 
  10  10   2    8.23    0.45 
  10  10   2    8.08    0.43 
 -10  10   2    8.77    0.61 
 -10  10   2    9.05    0.65 
 -10  10   2    9.27    0.58 
 -10  10   2    8.67    0.59 
  10  11   2    4.14    0.39 
  10 -11  -2    4.83    0.37 
  10  11   2    4.01    0.40 
  10  11   2    3.62    0.44 
  10  11   2    4.78    0.40 
 -10  11   2    4.50    0.55 
 -10  11   2    5.16    0.60 
 -10  11   2    4.49    0.47 
 -10  11   2    4.64    0.56 
  10  12   2    1.28    0.26 
  10  12   2    1.17    0.23 
  10 -12  -2    0.97    0.22 
  10  12   2    0.67    0.27 
 -10  12   2    1.21    0.34 
 -10  12   2    0.88    0.35 
 -10  12   2    1.71    0.41 
  11  11  -2    2.27    0.31 
  11 -11   2    2.38    0.32 
  11  11  -2    2.12    0.27 
  11 -11   2    2.13    0.33 
  11  11  -2    2.13    0.35 
 -11 -11   2    2.40    0.22 
 -11  11  -2    1.94    0.37 
 -11  11  -2    1.77    0.44 
 -11  11  -2    1.55    0.40 
  11  10  -2    3.40    0.34 
  11 -10   2    3.48    0.35 
  11  10  -2    3.54    0.37 
  11  10  -2    3.22    0.31 
  11 -10   2    3.62    0.35 
 -11  10  -2    4.14    0.49 
 -11  10  -2    3.31    0.44 
 -11 -10   2    3.40    0.35 
 -11  10  -2    3.01    0.44 
 -11  10  -2    3.63    0.46 
  11   9  -2    7.16    0.41 
  11  -9   2    7.37    0.48 
  11   9  -2    6.83    0.50 
  11  -9   2    6.88    0.49 
  11   9  -2    6.70    0.44 
 -11  -9   2    6.93    0.34 
 -11   9  -2    5.90    0.61 
 -11   9  -2    7.07    0.59 
 -11  -9   2    6.75    0.43 
 -11   9  -2    6.41    0.63 
 -11   9  -2    6.69    0.56 
  11   8  -2    7.07    0.40 
  11  -8   2    6.96    0.48 
  11   8  -2    7.05    0.46 
  11   8  -2    6.38    0.42 
  11  -8   2    7.70    0.48 
 -11  -8   2    7.23    0.43 
 -11   8  -2    6.94    0.54 
 -11   8  -2    6.19    0.55 
 -11   8  -2    6.11    0.58 
 -11   8  -2    7.10    0.55 
 -11  -8   2    6.79    0.33 
  11   7  -2   10.67    0.49 
  11   7  -2   10.40    0.52 
  11  -7   2   10.55    0.53 
  11  -7   2   11.24    0.54 
  11   7  -2   10.60    0.48 
 -11   7  -2   11.48    0.64 
 -11  -7   2   10.72    0.52 
 -11   7  -2   11.13    0.59 
 -11  -7   2   10.01    0.46 
 -11   7  -2   10.64    0.61 
 -11  -7   2   10.91    0.42 
 -11   7  -2   10.99    0.66 
  11   6  -2    7.05    0.43 
  11  -6   2    7.81    0.46 
  11  -6   2    7.02    0.49 
  11   6  -2    6.97    0.43 
  11  -6   2    7.59    0.46 
  11   6  -2    7.55    0.40 
  11   6  -2    7.74    0.42 
 -11   6  -2    7.31    0.48 
 -11   6  -2    6.95    0.49 
 -11  -6   2    7.47    0.42 
 -11  -6   2    8.06    0.35 
 -11   6  -2    7.46    0.56 
 -11  -6   2    8.12    0.46 
 -11   6  -2    7.52    0.70 
 -11   6  -2    7.97    0.53 
  11   5  -2   15.62    0.60 
  11  -5   2   14.93    0.63 
  11   5  -2   15.64    0.58 
  11  -5   2   15.35    0.63 
  11   5  -2   15.46    0.61 
  11  -5   2   15.22    0.64 
  11   5  -2   15.70    0.59 
 -11   5  -2   15.32    0.68 
 -11   5  -2   14.19    0.63 
 -11  -5   2   14.78    0.52 
 -11  -5   2   15.28    0.59 
 -11  -5   2   14.22    0.62 
 -11   5  -2   14.59    0.72 
 -11   5  -2   14.96    0.62 
  11   4  -2    0.75    0.19 
  11   4  -2    0.68    0.17 
  11   4  -2    0.71    0.20 
  11   4  -2    0.68    0.19 
  11  -4   2    0.64    0.20 
  11  -4   2    0.83    0.21 
  11  -4   2    0.70    0.20 
 -11   4  -2    0.47    0.20 
 -11   4  -2    0.47    0.24 
 -11  -4   2    0.44    0.19 
 -11  -4   2    0.74    0.20 
 -11  -4   2    0.81    0.16 
 -11   4  -2    0.73    0.19 
 -11   4  -2    0.76    0.22 
  11   3  -2   38.44    1.11 
  11   3  -2   37.84    1.11 
  11  -3   2   38.76    1.17 
  11   3  -2   38.86    1.13 
  11  -3   2   38.91    1.14 
  11  -3   2   37.99    1.14 
  11   3  -2   38.15    1.13 
 -11   3  -2   34.08    1.56 
 -11  -3   2   40.32    1.08 
 -11   3  -2   40.02    1.12 
 -11   3  -2   38.13    1.19 
 -11   3  -2   37.36    1.12 
 -11  -3   2   38.75    1.14 
  11   2  -2   -0.11    0.16 
  11  -2   2    0.08    0.16 
  11  -2   2    0.12    0.16 
  11   2  -2    0.30    0.17 
  11   2  -2    0.13    0.14 
  11   2  -2    0.30    0.17 
  11  -2   2    0.12    0.14 
 -11   2  -2    0.12    0.21 
 -11   2  -2   -0.06    0.16 
 -11   2  -2    0.29    0.15 
 -11  -2   2    0.04    0.14 
 -11  -2   2    0.40    0.19 
 -11   2  -2    0.11    0.14 
  11  -1   2    1.16    0.21 
  11  -1   2    1.23    0.20 
  11  -1   2    1.17    0.22 
  11   1  -2    1.16    0.22 
  11  -1   2    1.20    0.22 
  11   1  -2    1.10    0.20 
  11   1  -2    1.19    0.21 
 -11   1  -2    1.17    0.17 
 -11  -1   2    1.23    0.25 
 -11  -1   2    1.05    0.18 
 -11   1  -2    1.31    0.19 
 -11   1  -2    1.16    0.20 
 -11   1  -2    1.59    0.29 
 -11  -1   2    1.11    0.11 
  11   0   2   10.46    0.49 
  11   0  -2   10.87    0.49 
  11   0   2   10.12    0.46 
  11   0  -2   10.90    0.51 
  11   0   2   10.68    0.50 
  11   0   2   11.28    0.50 
  11   0  -2   10.17    0.48 
 -11   0   2   10.45    0.53 
 -11   0  -2   10.41    0.44 
 -11   0   2   10.80    0.55 
 -11   0  -2   10.25    0.34 
 -11   0  -2   10.57    0.38 
 -11   0   2   10.95    0.34 
 -11   0  -2   10.51    0.56 
  11  -1  -2    1.43    0.22 
  11  -1  -2    1.09    0.20 
  11   1   2    1.13    0.21 
  11   1   2    1.38    0.19 
  11   1   2    1.31    0.21 
  11   1   2    1.26    0.20 
 -11  -1  -2    1.18    0.12 
 -11   1   2    1.60    0.26 
 -11  -1  -2    1.48    0.16 
 -11   1   2    0.94    0.21 
 -11   1   2    1.11    0.14 
 -11  -1  -2    1.03    0.24 
 -11   1   2    1.36    0.21 
  11  -2  -2    0.04    0.16 
  11   2   2    0.19    0.16 
  11   2   2    0.27    0.15 
  11  -2  -2   -0.03    0.15 
  11   2   2    0.04    0.16 
  11   2   2    0.09    0.17 
 -11   2   2    0.04    0.19 
 -11   2   2    0.16    0.16 
 -11  -2  -2    0.25    0.21 
 -11   2   2    0.25    0.20 
 -11   2   2    0.16    0.11 
  11   3   2   37.80    1.12 
  11  -3  -2   38.81    1.17 
  11   3   2   38.96    1.09 
  11   3   2   37.00    1.14 
  11  -3  -2   37.67    1.12 
  11   3   2   36.79    1.12 
 -11  -3  -2   37.64    1.17 
 -11   3   2   40.02    1.08 
 -11  -3  -2   41.24    1.21 
 -11   3   2   39.45    1.23 
 -11   3   2   38.13    1.13 
  11   4   2    0.35    0.18 
  11   4   2    0.65    0.19 
  11  -4  -2    0.59    0.19 
  11   4   2    0.86    0.19 
  11   4   2    0.75    0.17 
  11  -4  -2    0.56    0.23 
  11  -4  -2    0.90    0.23 
 -11   4   2    0.41    0.22 
 -11  -4  -2    0.47    0.17 
 -11  -4  -2    0.50    0.21 
 -11   4   2    0.81    0.19 
 -11   4   2    0.56    0.19 
 -11   4   2    0.55    0.22 
 -11   4   2    0.79    0.18 
  11   5   2   14.74    0.55 
  11   5   2   14.58    0.59 
  11   5   2   14.11    0.59 
  11  -5  -2   14.53    0.59 
  11   5   2   13.90    0.59 
  11  -5  -2   15.37    0.63 
  11  -5  -2   14.69    0.65 
 -11  -5  -2   15.73    0.59 
 -11   5   2   16.23    0.64 
 -11   5   2   15.39    0.70 
 -11   5   2   14.73    0.71 
 -11   5   2   15.97    0.62 
 -11  -5  -2   15.04    0.62 
 -11   5   2   15.89    0.64 
  11  -6  -2    8.34    0.48 
  11  -6  -2    6.69    0.54 
  11   6   2    7.38    0.43 
  11   6   2    8.29    0.45 
  11   6   2    7.25    0.45 
  11   6   2    8.33    0.40 
  11  -6  -2    7.26    0.44 
 -11   6   2    7.51    0.48 
 -11  -6  -2    6.74    0.44 
 -11   6   2    6.23    0.54 
 -11  -6  -2    6.53    0.40 
 -11   6   2    8.19    0.55 
 -11   6   2    8.17    0.57 
 -11   6   2    6.13    0.56 
  11  -7  -2   10.60    0.55 
  11   7   2   10.58    0.50 
  11  -7  -2   11.33    0.52 
  11   7   2   10.54    0.46 
  11   7   2   10.23    0.51 
  11   7   2   10.90    0.52 
 -11   7   2   11.17    0.67 
 -11  -7  -2   10.33    0.52 
 -11  -7  -2   10.20    0.45 
 -11   7   2    9.90    0.62 
 -11   7   2   11.59    0.58 
 -11   7   2   10.78    0.58 
  11  -8  -2    7.09    0.51 
  11   8   2    7.11    0.46 
  11   8   2    7.07    0.45 
  11   8   2    7.13    0.43 
  11   8   2    6.44    0.40 
  11  -8  -2    6.75    0.44 
 -11   8   2    8.10    0.64 
 -11  -8  -2    6.47    0.37 
 -11   8   2    7.40    0.55 
 -11   8   2    6.84    0.52 
 -11   8   2    6.91    0.58 
  11   9   2    7.49    0.46 
  11   9   2    7.11    0.42 
  11   9   2    7.41    0.48 
  11  -9  -2    6.87    0.50 
  11  -9  -2    6.91    0.45 
  11   9   2    6.70    0.48 
 -11  -9  -2    7.03    0.36 
 -11   9   2    7.32    0.61 
 -11   9   2    6.50    0.55 
 -11  -9  -2    7.14    0.38 
 -11   9   2    7.71    0.60 
 -11   9   2    6.85    0.65 
  11  10   2    4.12    0.46 
  11  10   2    4.21    0.45 
  11  10   2    3.77    0.33 
  11 -10  -2    4.11    0.47 
  11 -10  -2    3.39    0.40 
 -11  10   2    4.02    0.42 
 -11  10   2    3.63    0.44 
 -11  10   2    2.92    0.41 
 -11  10   2    2.96    0.43 
 -11 -10  -2    3.68    0.36 
 -11 -10  -2    3.19    0.26 
  11  11   2    2.94    0.32 
  11 -11  -2    2.40    0.29 
  11 -11  -2    2.03    0.38 
  11  11   2    3.07    0.34 
 -11  11   2    1.80    0.36 
 -11  11   2    2.46    0.42 
 -11  11   2    2.52    0.41 
  12 -10   2    0.67    0.31 
  12  10  -2    0.55    0.25 
  12  10  -2    0.14    0.27 
 -12  10  -2   -0.12    0.36 
 -12  10  -2    0.68    0.37 
 -12  10  -2    0.10    0.39 
  12   9  -2    0.22    0.24 
  12  -9   2   -0.10    0.27 
  12   9  -2   -0.41    0.30 
  12   9  -2   -0.07    0.28 
  12   9  -2    0.30    0.23 
 -12   9  -2    0.31    0.31 
 -12   9  -2   -0.16    0.32 
 -12   9  -2   -0.53    0.37 
 -12   9  -2   -0.26    0.48 
  12   8  -2    3.22    0.32 
  12  -8   2    3.12    0.36 
  12   8  -2    3.09    0.35 
  12   8  -2    3.81    0.41 
  12   8  -2    3.11    0.38 
 -12   8  -2    3.63    0.42 
 -12   8  -2    3.31    0.45 
 -12   8  -2    3.54    0.46 
 -12   8  -2    2.82    0.37 
  12   7  -2    5.13    0.48 
  12   7  -2    5.22    0.42 
  12  -7   2    5.17    0.47 
  12   7  -2    4.42    0.44 
  12   7  -2    4.82    0.48 
 -12   7  -2    5.05    0.50 
 -12   7  -2    4.80    0.55 
 -12   7  -2    4.91    0.51 
 -12   7  -2    5.20    0.49 
  12   6  -2    1.73    0.25 
  12   6  -2    1.96    0.29 
  12   6  -2    1.54    0.25 
  12   6  -2    1.96    0.27 
  12  -6   2    1.47    0.28 
 -12   6  -2    2.24    0.32 
 -12   6  -2    1.64    0.32 
 -12   6  -2    0.95    0.33 
 -12  -6   2    1.60    0.24 
 -12   6  -2    1.77    0.31 
  12   5  -2    2.61    0.27 
  12  -5   2    2.46    0.34 
  12   5  -2    1.86    0.26 
  12  -5   2    1.96    0.29 
  12   5  -2    2.10    0.30 
  12   5  -2    2.19    0.28 
 -12   5  -2    1.70    0.36 
 -12   5  -2    2.17    0.29 
 -12   5  -2    2.80    0.38 
 -12  -5   2    2.29    0.27 
 -12   5  -2    2.30    0.48 
  12   4  -2   15.32    0.64 
  12   4  -2   16.22    0.66 
  12  -4   2   16.76    0.70 
  12   4  -2   15.43    0.66 
  12  -4   2   16.12    0.66 
  12   4  -2   15.90    0.63 
 -12   4  -2   16.45    0.66 
 -12  -4   2   15.62    0.66 
 -12   4  -2   13.37    0.76 
 -12   4  -2   15.37    0.64 
 -12   4  -2   15.45    0.73 
  12   3  -2   16.45    0.66 
  12   3  -2   16.33    0.66 
  12  -3   2   16.31    0.68 
  12  -3   2   15.70    0.66 
  12  -3   2   16.24    0.68 
  12   3  -2   15.54    0.63 
  12   3  -2   15.25    0.62 
 -12  -3   2   16.53    0.68 
 -12   3  -2   15.30    0.64 
 -12   3  -2   15.60    0.77 
 -12   3  -2   16.51    0.63 
 -12   3  -2   16.64    0.72 
  12  -2   2   42.60    1.26 
  12   2  -2   43.07    1.25 
  12  -2   2   41.73    1.28 
  12   2  -2   42.65    1.27 
  12   2  -2   43.85    1.27 
  12  -2   2   41.34    1.25 
  12  -2   2   39.86    1.31 
 -12   2  -2   43.51    1.23 
 -12   2  -2   42.62    1.32 
 -12   2  -2   42.49    1.36 
 -12   2  -2   42.84    1.18 
 -12  -2   2   42.74    1.42 
 -12  -2   2   44.04    1.29 
 -12   2  -2   41.61    1.25 
  12  -1   2    1.02    0.22 
  12   1  -2    0.97    0.23 
  12   1  -2    0.90    0.23 
  12  -1   2    0.82    0.21 
  12  -1   2    0.63    0.19 
  12  -1   2    0.80    0.23 
  12   1  -2    0.72    0.21 
 -12  -1   2    0.87    0.24 
 -12  -1   2    0.90    0.24 
 -12   1  -2    0.81    0.19 
 -12   1  -2    0.86    0.17 
 -12   1  -2    0.98    0.14 
 -12   1  -2    0.91    0.22 
 -12   1  -2    0.65    0.27 
 -12   1  -2    1.20    0.24 
  12   0   2    1.96    0.27 
  12   0   2    1.44    0.23 
  12   0   2    2.10    0.27 
  12   0  -2    1.80    0.28 
  12   0  -2    1.85    0.25 
  12   0   2    1.61    0.25 
  12   0  -2    1.31    0.25 
 -12   0  -2    1.41    0.17 
 -12   0   2    1.70    0.29 
 -12   0  -2    1.86    0.22 
 -12   0  -2    1.55    0.30 
 -12   0   2    1.71    0.17 
 -12   0  -2    1.54    0.23 
 -12   0   2    1.50    0.28 
 -12   0  -2    2.28    0.29 
 -12   0   2    2.08    0.33 
  12   1   2    1.01    0.23 
  12  -1  -2    0.63    0.21 
  12  -1  -2    0.73    0.21 
  12   1   2    0.54    0.19 
  12   1   2    1.27    0.24 
  12   1   2    0.88    0.23 
  12  -1  -2    0.76    0.23 
 -12   1   2    1.08    0.21 
 -12  -1  -2    0.69    0.26 
 -12  -1  -2    1.12    0.20 
 -12  -1  -2    1.09    0.12 
 -12  -1  -2    1.04    0.24 
 -12   1   2    0.93    0.27 
 -12  -1  -2    1.01    0.11 
 -12   1   2    0.76    0.25 
 -12   1   2    1.01    0.14 
  12   2   2   41.83    1.26 
  12  -2  -2   44.50    1.26 
  12   2   2   40.69    1.25 
  12   2   2   43.69    1.22 
  12  -2  -2   42.32    1.29 
  12   2   2   42.08    1.26 
  12  -2  -2   41.95    1.33 
 -12   2   2   41.99    1.24 
 -12  -2  -2   42.49    1.22 
 -12  -2  -2   41.75    1.29 
 -12   2   2   42.54    1.34 
 -12   2   2   40.48    1.34 
 -12   2   2   43.32    1.14 
 -12  -2  -2   42.23    1.32 
 -12   2   2   44.00    1.27 
  12   3   2   16.31    0.66 
  12  -3  -2   16.44    0.64 
  12   3   2   16.60    0.66 
  12   3   2   16.01    0.67 
  12   3   2   16.37    0.62 
  12  -3  -2   15.08    0.69 
 -12  -3  -2   15.25    0.71 
 -12   3   2   16.37    0.66 
 -12   3   2   16.04    0.75 
 -12   3   2   17.08    0.59 
 -12  -3  -2   15.56    0.60 
 -12   3   2   14.52    0.75 
 -12   3   2   15.69    0.66 
  12   4   2   15.46    0.64 
  12   4   2   15.89    0.65 
  12   4   2   15.33    0.60 
  12  -4  -2   14.86    0.63 
  12   4   2   16.06    0.65 
 -12  -4  -2   15.66    0.59 
 -12   4   2   16.22    0.62 
 -12   4   2   15.83    0.78 
 -12   4   2   15.37    0.66 
 -12  -4  -2   15.96    0.70 
 -12   4   2   16.04    0.75 
  12  -5  -2    1.92    0.28 
  12   5   2    2.45    0.29 
  12   5   2    2.21    0.29 
  12   5   2    2.69    0.27 
  12   5   2    2.46    0.31 
 -12  -5  -2    2.23    0.30 
 -12   5   2    2.46    0.29 
 -12   5   2    2.34    0.39 
 -12  -5  -2    2.20    0.24 
 -12   5   2    2.28    0.28 
 -12   5   2    2.68    0.37 
  12   6   2    1.79    0.28 
  12   6   2    1.37    0.25 
  12  -6  -2    2.03    0.28 
  12   6   2    1.89    0.25 
  12   6   2    1.50    0.28 
 -12   6   2    2.24    0.36 
 -12  -6  -2    1.54    0.29 
 -12   6   2    2.14    0.32 
 -12   6   2    2.38    0.30 
 -12   6   2    1.53    0.36 
 -12  -6  -2    2.20    0.23 
  12   7   2    5.17    0.41 
  12  -7  -2    5.50    0.47 
  12   7   2    4.57    0.46 
  12   7   2    5.05    0.45 
  12   7   2    4.78    0.47 
 -12   7   2    5.16    0.61 
 -12   7   2    7.12    0.68 
 -12   7   2    5.18    0.51 
 -12   7   2    5.74    0.53 
 -12  -7  -2    5.90    0.38 
  12  -8  -2    3.19    0.33 
  12   8   2    3.21    0.35 
  12   8   2    4.20    0.47 
  12   8   2    4.23    0.40 
  12   8   2    3.42    0.36 
 -12   8   2    2.96    0.45 
 -12   8   2    2.92    0.42 
 -12   8   2    4.58    0.52 
 -12   8   2    3.45    0.40 
 -12  -8  -2    4.00    0.36 
  12   9   2    0.04    0.27 
  12  -9  -2   -0.03    0.24 
  12   9   2    0.14    0.26 
  12   9   2   -0.01    0.29 
 -12   9   2   -0.09    0.34 
 -12   9   2   -0.05    0.39 
 -12  -9  -2   -0.20    0.22 
 -12   9   2    0.22    0.28 
 -12   9   2    0.10    0.31 
  12  10   2    0.54    0.28 
  12  10   2    0.67    0.31 
  12 -10  -2    0.70    0.28 
 -12  10   2    0.65    0.34 
 -12  10   2    0.68    0.37 
 -12  10   2    0.76    0.38 
 -12  10   2    0.61    0.63 
  13   8  -2    8.09    0.59 
  13   8  -2    8.35    0.56 
  13  -8   2    8.83    0.61 
 -13   8  -2    9.35    0.69 
 -13   8  -2    7.05    0.79 
 -13   8  -2    8.69    0.72 
  13   7  -2    5.05    0.50 
  13   7  -2    5.62    0.67 
  13  -7   2    4.94    0.44 
  13   7  -2    5.57    0.48 
 -13   7  -2    5.30    0.61 
 -13   7  -2    4.06    0.53 
 -13   7  -2    4.69    0.57 
 -13  -7   2    5.45    0.42 
  13   6  -2    2.77    0.34 
  13  -6   2    2.75    0.37 
  13   6  -2    2.72    0.39 
  13   6  -2    2.75    0.31 
 -13  -6   2    2.95    0.28 
 -13   6  -2    2.35    0.36 
 -13   6  -2    2.65    0.36 
 -13   6  -2    2.68    0.47 
  13  -5   2   19.60    0.80 
  13   5  -2   17.65    0.75 
  13   5  -2   18.46    0.81 
  13   5  -2   18.71    0.75 
 -13   5  -2   18.70    0.78 
 -13  -5   2   19.08    0.69 
 -13   5  -2   19.88    0.81 
 -13   5  -2   19.89    0.96 
 -13  -5   2   20.12    0.78 
  13   4  -2    4.84    0.51 
  13   4  -2    4.25    0.45 
  13   4  -2    4.68    0.43 
  13  -4   2    4.09    0.46 
 -13  -4   2    4.65    0.39 
 -13   4  -2    4.35    0.45 
 -13   4  -2    4.28    0.46 
 -13   4  -2    3.87    0.46 
 -13  -4   2    5.57    0.50 
  13   3  -2   23.46    0.85 
  13  -3   2   25.16    0.93 
  13   3  -2   24.41    0.89 
  13  -3   2   23.30    0.88 
 -13   3  -2   22.88    1.01 
 -13  -3   2   24.64    0.92 
 -13   3  -2   23.25    0.86 
 -13  -3   2   24.74    0.82 
 -13   3  -2   24.65    0.82 
  13  -2   2    3.27    0.34 
  13  -2   2    3.50    0.41 
  13   2  -2    2.89    0.35 
  13   2  -2    3.81    0.41 
  13  -2   2    3.32    0.37 
 -13  -2   2    3.90    0.42 
 -13   2  -2    4.00    0.36 
 -13   2  -2    2.92    0.30 
 -13  -2   2    3.39    0.37 
 -13   2  -2    3.44    0.43 
  13  -1   2   16.68    0.72 
  13  -1   2   16.62    0.73 
  13   1  -2   17.64    0.72 
  13  -1   2   17.74    0.75 
  13   1  -2   17.74    0.76 
 -13  -1   2   17.52    0.70 
 -13   1  -2   17.16    0.55 
 -13   1  -2   17.79    0.85 
 -13  -1   2   18.05    0.79 
 -13   1  -2   17.72    0.68 
 -13   1  -2   17.74    0.59 
  13   0  -2   11.63    0.60 
  13   0   2   12.01    0.62 
  13   0   2   12.23    0.62 
  13   0   2   12.81    0.60 
  13   0  -2   11.62    0.65 
 -13   0   2   12.01    0.59 
 -13   0  -2   10.85    1.10 
 -13   0   2   11.06    0.37 
 -13   0  -2   12.55    0.42 
 -13   0   2   12.11    0.72 
  13  -1  -2   17.92    0.72 
  13   1   2   18.13    0.73 
  13   1   2   18.10    0.75 
  13   1   2   16.36    0.70 
 -13   1   2   18.04    0.82 
 -13   1   2   17.79    0.55 
 -13  -1  -2   17.25    0.83 
  13   2   2    3.44    0.33 
  13  -2  -2    3.35    0.34 
  13   2   2    3.17    0.33 
  13   2   2    3.91    0.43 
 -13   2   2    3.45    0.30 
 -13   2   2    3.20    0.40 
 -13  -2  -2    3.14    0.39 
 -13   2   2    4.06    0.42 
  13  -3  -2   24.19    0.86 
  13   3   2   23.97    0.87 
  13   3   2   24.04    0.84 
  13   3   2   23.52    0.88 
 -13   3   2   24.90    0.88 
 -13   3   2   24.59    0.78 
 -13  -3  -2   24.25    0.95 
 -13   3   2   24.59    1.00 
  13   4   2    4.49    0.44 
  13   4   2    5.60    0.49 
  13   4   2    4.31    0.46 
  13  -4  -2    5.00    0.45 
 -13   4   2    4.37    0.48 
 -13   4   2    4.52    0.41 
 -13  -4  -2    4.98    0.55 
 -13   4   2    5.16    0.63 
  13   5   2   19.39    0.78 
  13   5   2   17.90    0.77 
  13   5   2   19.14    0.74 
  13  -5  -2   19.54    0.76 
 -13   5   2   19.65    0.76 
 -13  -5  -2   18.62    0.83 
 -13   5   2   19.94    0.93 
 -13   5   2   19.36    0.80 
  13   6   2    2.72    0.32 
  13  -6  -2    2.37    0.34 
  13   6   2    2.95    0.36 
  13   6   2    2.26    0.35 
 -13   6   2    2.71    0.41 
 -13   6   2    2.55    0.35 
 -13   6   2    2.17    0.36 
  13   7   2    5.03    0.52 
  13   7   2    5.24    0.54 
  13  -7  -2    5.38    0.53 
 -13   7   2    6.09    0.58 
 -13   7   2    4.95    0.52 
 -13   7   2    5.28    0.62 
  13   8   2    7.90    0.60 
  13  -8  -2    7.38    0.59 
  13   8   2    8.88    0.63 
 -13   8   2    8.15    0.68 
 -13   8   2    8.27    0.76 
 -13   8   2    8.47    0.68 
  14   6  -2    2.88    0.40 
  14   6  -2    3.14    0.36 
  14  -6   2    2.46    0.40 
 -14   6  -2    2.65    0.41 
 -14   6  -2    2.84    0.41 
 -14   6  -2    1.77    0.48 
  14   5  -2    3.25    0.40 
  14  -5   2    3.38    0.42 
 -14   5  -2    3.42    0.53 
 -14   5  -2    3.87    0.44 
 -14   5  -2    3.63    0.40 
  14   4  -2    0.45    0.31 
  14  -4   2    0.74    0.33 
 -14   4  -2   -0.19    0.39 
 -14  -4   2    0.63    0.32 
 -14   4  -2    0.40    0.33 
 -14   4  -2    0.84    0.31 
  14  -3   2    2.76    0.38 
  14   3  -2    3.71    0.38 
 -14   3  -2    2.95    0.48 
 -14   3  -2    4.09    0.45 
 -14   3  -2    3.66    0.39 
 -14  -3   2    3.60    0.43 
  14  -2   2   11.10    0.64 
  14   2  -2   10.68    0.64 
 -14   2  -2   11.10    0.53 
 -14   2  -2   11.28    0.61 
 -14   2  -2    9.71    0.79 
 -14  -2   2   11.39    0.88 
  14  -1   2    6.28    0.54 
  14   1  -2    7.05    0.54 
  14  -1   2    6.93    0.57 
 -14  -1   2    7.09    0.66 
 -14   1  -2    6.06    0.57 
 -14   1  -2    7.66    0.53 
  14   0   2    8.55    0.58 
  14   0   2    8.56    0.62 
  14   0   2    8.24    0.59 
  14   0  -2    8.22    0.56 
 -14   0  -2    7.60    0.73 
 -14   0   2    8.59    0.69 
  14  -1  -2    5.98    0.51 
  14   1   2    6.60    0.57 
  14   1   2    6.68    0.57 
  14   1   2    5.83    0.54 
 -14  -1  -2    6.10    0.70 
 -14   1   2    6.97    0.69 
  14   2   2    9.72    0.62 
  14   2   2   11.44    0.67 
  14   2   2   10.88    0.67 
  14  -2  -2   10.29    0.61 
 -14   2   2   11.28    0.47 
 -14   2   2   11.78    0.77 
 -14  -2  -2   11.52    0.78 
  14   3   2    3.46    0.39 
  14   3   2    3.80    0.41 
  14   3   2    3.06    0.37 
  14  -3  -2    3.44    0.39 
 -14   3   2    4.51    0.51 
 -14   3   2    3.60    0.40 
 -14  -3  -2    3.82    0.47 
 -14   3   2    3.23    0.44 
  14  -4  -2    0.55    0.31 
  14   4   2    0.89    0.32 
  14   4   2    0.79    0.30 
  14   4   2    0.99    0.29 
 -14   4   2    0.67    0.38 
 -14  -4  -2    0.38    0.38 
 -14   4   2    1.18    0.29 
 -14   4   2    0.45    0.30 
  14   5   2    3.53    0.41 
  14  -5  -2    3.22    0.39 
  14   5   2    4.07    0.41 
 -14   5   2    2.97    0.47 
 -14   5   2    3.42    0.37 
 -14   5   2    3.29    0.41 
  14  -6  -2    2.59    0.38 
  14   6   2    2.67    0.37 
  14   6   2    2.68    0.41 
 -14   6   2    3.04    0.39 
 -14   6   2    2.61    0.41 
 -14   6   2    3.07    0.50 
  15   2  -2    0.73    0.36 
 -15  -2   2    1.35    0.44 
 -15   2  -2    1.32    0.52 
 -15   2  -2    1.38    0.35 
  15   1  -2    7.01    0.68 
 -15  -1   2    7.71    0.81 
 -15   1  -2    6.73    0.84 
  15   0  -2    1.09    0.42 
  15   0   2   -0.07    0.37 
  15   0   2    0.43    0.32 
 -15   0  -2    0.30    0.43 
 -15   0   2    0.63    0.41 
  15   1   2    6.92    0.66 
  15   1   2    7.49    0.65 
 -15   1   2    7.69    0.83 
 -15  -1  -2    8.16    0.86 
  15   2   2    1.12    0.38 
  15   2   2    0.98    0.35 
 -15  -2  -2    1.74    0.52 
 -15   2   2    1.17    0.48 
   0  17  -3    1.87    0.44 
   0  17  -3    1.38    0.40 
   0  16  -3    0.46    0.30 
   0  16  -3    0.06    0.21 
   0  16  -3   -0.62    0.31 
   0  16  -3    0.21    0.14 
   0  15  -3   13.82    0.70 
   0  15  -3   14.34    0.55 
   0  15  -3   13.52    0.46 
   0  15  -3   14.42    0.52 
   0  15  -3   14.83    0.74 
   0  14  -3    0.23    0.22 
   0  14  -3    0.17    0.14 
   0  14  -3    0.02    0.13 
   0  13  -3    0.57    0.12 
   0  13  -3    0.50    0.07 
   0  13  -3    0.44    0.20 
   0  13  -3    0.47    0.10 
   0  13  -3    0.57    0.13 
   0  12  -3    0.29    0.15 
   0  12  -3    0.24    0.06 
   0  12  -3    0.28    0.09 
   0  12  -3    0.49    0.11 
   0  12  -3    0.41    0.10 
   0  11  -3    4.07    0.16 
   0  11  -3    3.93    0.19 
   0  11  -3    4.02    0.21 
   0  11  -3    3.65    0.30 
   0  10  -3    1.61    0.18 
   0  10  -3    1.98    0.13 
   0 -10   3    2.03    0.15 
   0  10  -3    2.02    0.10 
   0  -9   3   40.31    1.03 
   0   9  -3   40.52    0.99 
   0   9  -3   40.53    0.99 
   0   9  -3   40.40    1.10 
   0   8  -3    0.53    0.06 
   0   8  -3    0.42    0.06 
   0   8  -3    0.45    0.10 
   0   7  -3   27.39    0.67 
   0   7  -3   26.25    0.74 
   0   7  -3   26.93    0.69 
   0   7  -3   26.96    0.67 
   0   6  -3   13.71    0.43 
   0   6  -3   14.52    0.38 
   0   6  -3   14.00    0.37 
   0   6  -3   14.25    0.37 
   0   5  -3    2.55    0.14 
   0  -5   3    2.72    0.12 
   0   5  -3    2.87    0.10 
   0  -5   3    2.84    0.08 
   0  -5   3    2.33    0.08 
   0   5  -3    2.63    0.10 
   0   5  -3    2.82    0.10 
   0   4  -3   39.38    0.94 
   0  -4   3   39.54    0.93 
   0   4  -3   39.44    0.94 
   0  -4   3   38.95    0.95 
   0   4  -3   38.36    0.94 
   0   3  -3   87.68    2.04 
   0  -3   3   77.61    2.03 
   0   3  -3   85.74    2.04 
   0  -3   3   89.32    2.03 
   0   3  -3   93.60    2.03 
   0   2  -3  275.07    6.58 
   0  -2   3  276.51    6.56 
   0  -2   3  264.93    6.56 
   0  -2   3  288.36    6.55 
   0   2  -3  284.14    6.60 
   0   2  -3  285.27    6.53 
   0  -1   3   63.83    1.57 
   0   1  -3   66.99    1.56 
   0   1  -3   65.07    1.56 
   0   1  -3   67.68    1.59 
   0   1  -3   65.78    1.57 
   0  -1   3   68.00    1.57 
   0  -1   3   67.14    1.56 
   0   0  -3    0.13    0.02 
   0   1   3   62.99    1.55 
   0   1   3   68.48    1.55 
   0  -1  -3   67.26    1.55 
   0  -1  -3   67.23    1.57 
   0   1   3   68.18    1.56 
   0   1   3   65.95    1.57 
   0  -1  -3   62.56    1.55 
   0  -1  -3   65.34    1.55 
   0  -2  -3  276.29    6.70 
   0   2   3  277.25    6.71 
   0  -2  -3  287.64    6.77 
   0  -2  -3  278.18    6.66 
   0   2   3  283.20    6.68 
   0  -2  -3  286.20    6.68 
   0   2   3  294.27    6.81 
   0   2   3  290.06    6.71 
   0   3   3   87.23    2.08 
   0   3   3   89.53    2.07 
   0  -3  -3   90.40    2.12 
   0  -3  -3   87.58    2.08 
   0   3   3   87.70    2.07 
   0  -3  -3   88.94    2.08 
   0   3   3   88.51    2.11 
   0   4   3   40.52    0.93 
   0  -4  -3   38.24    0.99 
   0  -4  -3   38.82    0.94 
   0  -4  -3   39.87    0.95 
   0   4   3   39.41    0.93 
   0   4   3   39.67    0.95 
   0   4   3   36.10    0.98 
   0   5   3    2.79    0.09 
   0  -5  -3    2.66    0.12 
   0   5   3    2.59    0.13 
   0  -5  -3    2.77    0.16 
   0   5   3    2.71    0.15 
   0  -5  -3    2.57    0.11 
   0   5   3    2.73    0.10 
   0   6   3   14.05    0.37 
   0  -6  -3   13.83    0.40 
   0   6   3   14.89    0.36 
   0  -6  -3   13.94    0.39 
   0   6   3   14.19    0.45 
   0   6   3   14.29    0.41 
   0   7   3   27.71    0.65 
   0  -7  -3   26.33    0.68 
   0  -7  -3   26.41    0.71 
   0   7   3   26.84    0.67 
   0   7   3   26.52    0.72 
   0   7   3   27.13    0.66 
   0   7   3   26.54    0.76 
   0   8   3    0.44    0.11 
   0   8   3    0.57    0.06 
   0   8   3    0.59    0.06 
   0   8   3    0.50    0.10 
   0  -8  -3    0.52    0.08 
   0   8   3    0.56    0.06 
   0  -9  -3   40.68    1.06 
   0   9   3   40.87    1.01 
   0   9   3   41.02    0.98 
   0   9   3   41.05    1.13 
   0   9   3   40.56    0.99 
   0   9   3   41.21    1.09 
   0   9   3   41.35    1.01 
   0  10   3    1.86    0.12 
   0  10   3    1.77    0.09 
   0  10   3    1.64    0.20 
   0  10   3    1.97    0.21 
   0  10   3    1.67    0.10 
   0  10   3    1.92    0.14 
   0  11   3    4.22    0.20 
   0  11   3    3.90    0.16 
   0  11   3    4.02    0.15 
   0  11   3    3.95    0.32 
   0  11   3    3.98    0.29 
   0  11   3    4.16    0.13 
   0  12   3    0.61    0.19 
   0  12   3    0.51    0.11 
   0  12   3    0.29    0.08 
   0  12   3    0.51    0.16 
   0  13   3    0.42    0.20 
   0  13   3    0.36    0.10 
   0  13   3    0.62    0.20 
   0  14   3    0.30    0.22 
   0  14   3   -0.02    0.11 
   0  14   3    0.11    0.19 
   0  14   3    0.07    0.11 
   0  15   3   14.32    0.66 
   0  15   3   13.88    0.53 
   0  15   3   13.96    0.48 
   0  15   3   14.66    0.70 
   0  16   3    0.09    0.30 
   0  16   3   -0.26    0.28 
   0  16   3    0.19    0.18 
   0  17   3    1.50    0.40 
   0  17   3    2.03    0.39 
   0  17   3    1.78    0.26 
   1  17  -3    6.55    0.70 
  -1  17  -3    6.38    0.74 
   1  16  -3    1.93    0.22 
   1  16  -3    1.74    0.19 
   1  16  -3    1.07    0.34 
   1  16  -3    1.94    0.39 
  -1  16  -3    1.77    0.40 
  -1  16  -3    2.14    0.28 
  -1  16  -3    2.22    0.42 
   1  15  -3    1.82    0.21 
   1  15  -3    1.84    0.35 
   1  15  -3    1.80    0.19 
   1  15  -3    1.47    0.30 
   1  15  -3    1.69    0.20 
  -1  15  -3    1.52    0.14 
  -1  15  -3    1.46    0.30 
  -1  15  -3    1.16    0.31 
  -1  15  -3    1.64    0.23 
  -1  15  -3    1.85    0.23 
   1  14  -3    7.89    0.32 
   1  14  -3    7.78    0.53 
   1  14  -3    8.44    0.51 
   1  14  -3    7.95    0.31 
   1  14  -3    7.98    0.36 
  -1  14  -3    8.11    0.27 
  -1  14  -3    7.89    0.52 
  -1  14  -3    7.68    0.38 
  -1  14  -3    7.94    0.40 
  -1  14  -3    7.82    0.32 
   1  13  -3    2.17    0.26 
   1  13  -3    2.98    0.19 
   1  13  -3    2.68    0.17 
  -1  13  -3    3.08    0.37 
  -1  13  -3    2.84    0.23 
  -1  13  -3    2.94    0.25 
  -1  13  -3    2.95    0.25 
  -1  13  -3    2.93    0.16 
   1  12  -3    8.17    0.28 
   1  12  -3    8.57    0.23 
   1  12  -3    8.44    0.28 
   1  12  -3    8.32    0.25 
   1  12  -3    6.54    0.61 
  -1  12  -3    8.36    0.45 
  -1  12  -3    8.45    0.33 
  -1  12  -3    8.52    0.35 
  -1  12  -3    8.02    0.33 
  -1  12  -3    7.78    0.27 
   1  11  -3   51.22    1.38 
   1  11  -3   50.92    1.24 
   1  11  -3   52.43    1.22 
   1  11  -3   51.59    1.25 
  -1  11  -3   50.73    1.25 
  -1  11  -3   51.11    1.41 
  -1  11  -3   49.78    1.31 
  -1  11  -3   50.82    1.28 
  -1  11  -3   50.73    1.31 
   1  10  -3    0.22    0.06 
   1  10  -3    0.37    0.13 
   1  10  -3    0.28    0.05 
  -1  10  -3    0.18    0.05 
  -1  10  -3    0.23    0.08 
  -1 -10   3    0.29    0.07 
  -1  10  -3    0.20    0.12 
  -1  10  -3    0.22    0.08 
   1   9  -3   24.02    0.58 
   1   9  -3   22.65    0.68 
  -1   9  -3   22.58    0.63 
  -1   9  -3   22.99    0.61 
  -1   9  -3   22.69    0.60 
  -1   9  -3   22.57    0.70 
  -1  -9   3   22.41    0.60 
   1   8  -3   30.03    0.71 
   1   8  -3   29.46    0.70 
   1   8  -3   28.36    0.79 
   1  -8   3   27.85    0.77 
  -1   8  -3   27.21    0.81 
  -1   8  -3   28.73    0.76 
  -1   8  -3   28.76    0.73 
  -1  -8   3   28.30    0.73 
  -1   8  -3   28.75    0.73 
   1   7  -3   25.11    0.61 
   1  -7   3   24.83    0.67 
   1   7  -3   24.96    0.69 
   1   7  -3   25.19    0.62 
  -1  -7   3   24.12    0.63 
  -1   7  -3   25.04    0.64 
  -1   7  -3   25.38    0.66 
  -1   7  -3   24.71    0.71 
  -1   7  -3   24.69    0.64 
   1  -6   3   81.97    1.89 
   1   6  -3   81.87    1.91 
   1   6  -3   82.07    1.91 
  -1   6  -3   75.64    1.98 
  -1   6  -3   81.78    1.94 
  -1   6  -3   82.99    1.95 
  -1   6  -3   82.04    1.93 
   1   5  -3   85.39    2.01 
   1  -5   3   86.24    2.02 
   1  -5   3   78.90    2.06 
   1   5  -3   86.88    2.01 
   1  -5   3   86.79    2.00 
  -1   5  -3   87.35    2.08 
  -1   5  -3   85.95    2.04 
  -1   5  -3   86.63    2.03 
  -1   5  -3   86.14    2.03 
   1   4  -3  103.47    2.38 
   1   4  -3   99.96    2.40 
   1   4  -3  103.27    2.40 
   1  -4   3   99.37    2.43 
   1  -4   3  102.00    2.40 
  -1   4  -3  104.31    2.45 
  -1  -4   3  101.77    2.38 
  -1   4  -3  103.11    2.41 
  -1   4  -3  103.89    2.42 
  -1   4  -3  103.61    2.42 
   1  -3   3  117.04    2.78 
   1  -3   3  118.09    2.79 
   1  -3   3  115.64    2.77 
   1   3  -3  118.69    2.76 
   1   3  -3  121.46    2.83 
  -1  -3   3  122.12    2.77 
  -1  -3   3  116.34    2.77 
  -1   3  -3  122.86    2.78 
  -1   3  -3  123.92    2.78 
  -1   3  -3  110.13    2.79 
  -1   3  -3  116.34    2.77 
   1   2  -3  218.09    4.93 
   1  -2   3  201.44    4.89 
   1   2  -3  204.79    4.86 
   1  -2   3  209.26    4.87 
   1  -2   3  208.54    4.89 
   1   2  -3  202.22    4.83 
  -1  -2   3  209.22    4.83 
  -1  -2   3  181.05    4.97 
  -1   2  -3  210.71    4.92 
  -1   2  -3  208.81    4.90 
  -1   2  -3  201.26    4.85 
  -1   2  -3  211.04    4.81 
   1  -1   3  105.60    2.60 
   1   1  -3  117.43    2.63 
   1  -1   3  113.80    2.60 
   1  -1   3  112.66    2.64 
   1   1  -3  108.08    2.60 
   1   1  -3  113.82    2.63 
  -1   1  -3  107.17    2.60 
  -1   1  -3  114.62    2.62 
  -1  -1   3  108.91    2.63 
  -1   1  -3  111.57    2.63 
  -1   1  -3  107.27    2.61 
  -1   1  -3  109.17    2.64 
  -1  -1   3  111.71    2.59 
  -1  -1   3  111.98    2.60 
   1   0   3  530.34   12.80 
   1   0   3  543.47   12.83 
   1   0  -3  556.59   12.86 
   1   0  -3  556.60   12.86 
   1   0  -3  540.23   12.79 
   1   0   3  536.65   12.84 
  -1   0  -3  534.68   12.78 
  -1   0  -3  566.42   12.86 
  -1   0  -3  544.05   12.80 
  -1   0   3  568.85   12.82 
  -1   0   3  508.20   12.79 
  -1   0   3  556.79   12.85 
  -1   0  -3  556.34   12.83 
   1  -1  -3  106.06    2.59 
   1   1   3  109.89    2.61 
   1   1   3  110.76    2.60 
   1  -1  -3  115.34    2.63 
   1  -1  -3  114.85    2.63 
   1  -1  -3  109.29    2.60 
   1   1   3  109.33    2.61 
   1   1   3  112.85    2.61 
  -1  -1  -3  111.78    2.62 
  -1  -1  -3  113.58    2.63 
  -1  -1  -3  111.37    2.59 
  -1   1   3  109.12    2.59 
  -1  -1  -3  110.41    2.60 
  -1   1   3  115.52    2.62 
  -1   1   3  107.22    2.59 
  -1   1   3  105.61    2.60 
   1  -2  -3  206.56    4.89 
   1  -2  -3  205.68    4.85 
   1  -2  -3  201.69    4.91 
   1   2   3  209.25    4.85 
   1   2   3  210.56    4.92 
   1  -2  -3  209.77    4.91 
   1   2   3  207.92    4.91 
   1   2   3  202.80    4.86 
  -1   2   3  211.59    4.91 
  -1  -2  -3  197.63    4.88 
  -1   2   3  204.99    4.85 
  -1  -2  -3  216.90    4.79 
  -1   2   3  202.98    4.83 
  -1  -2  -3  195.60    4.82 
  -1   2   3  209.60    4.95 
  -1  -2  -3  207.16    4.86 
  -1  -2  -3  201.31    4.84 
   1  -3  -3  120.27    2.84 
   1   3   3  119.96    2.83 
   1   3   3  119.99    2.81 
   1   3   3  121.89    2.81 
   1  -3  -3  117.34    2.81 
   1  -3  -3  119.40    2.81 
   1  -3  -3  117.74    2.78 
   1   3   3  122.47    2.80 
   1   3   3  120.64    2.77 
  -1   3   3  119.78    2.83 
  -1   3   3  118.06    2.80 
  -1  -3  -3  117.45    2.77 
  -1   3   3  118.45    2.79 
  -1  -3  -3  119.95    2.82 
  -1   3   3  117.60    2.81 
  -1  -3  -3  117.04    2.78 
   1  -4  -3   98.37    2.40 
   1   4   3  103.19    2.39 
   1  -4  -3  101.69    2.40 
   1  -4  -3   99.51    2.37 
   1   4   3  103.02    2.37 
   1   4   3  100.65    2.41 
   1   4   3  102.09    2.36 
   1  -4  -3  100.53    2.36 
   1  -4  -3   96.41    2.43 
   1   4   3  104.28    2.36 
  -1  -4  -3  102.26    2.37 
  -1   4   3   97.73    2.43 
  -1   4   3  103.29    2.40 
  -1   4   3  104.02    2.37 
  -1  -4  -3   98.95    2.42 
  -1  -4  -3  102.23    2.36 
  -1   4   3  101.11    2.38 
   1  -5  -3   86.79    2.11 
   1   5   3   86.66    2.01 
   1  -5  -3   85.54    1.99 
   1   5   3   86.63    2.05 
   1   5   3   85.92    2.07 
   1  -5  -3   86.76    2.06 
   1   5   3   85.06    2.03 
   1  -5  -3   85.27    1.99 
   1   5   3   86.70    2.00 
   1  -5  -3   84.95    2.05 
  -1  -5  -3   86.84    2.03 
  -1   5   3   86.95    2.04 
  -1  -5  -3   80.72    2.08 
  -1   5   3   88.20    2.02 
  -1  -5  -3   85.17    2.01 
  -1   5   3   84.63    2.06 
  -1   5   3   86.03    2.10 
   1  -6  -3   80.99    1.96 
   1   6   3   81.14    1.96 
   1   6   3   83.04    1.91 
   1  -6  -3   80.45    1.98 
   1   6   3   77.91    1.99 
   1   6   3   82.39    1.96 
   1   6   3   82.38    1.90 
  -1   6   3   81.92    1.94 
  -1  -6  -3   84.12    2.02 
  -1  -6  -3   82.55    1.94 
  -1   6   3   80.19    2.02 
  -1   6   3   81.78    1.99 
  -1   6   3   83.22    1.93 
  -1  -6  -3   81.68    1.92 
   1  -7  -3   25.16    0.69 
   1   7   3   25.76    0.60 
   1   7   3   26.04    0.67 
   1  -7  -3   24.54    0.67 
   1   7   3   25.40    0.71 
   1   7   3   25.52    0.61 
   1   7   3   24.96    0.68 
  -1   7   3   25.79    0.65 
  -1   7   3   25.10    0.70 
  -1  -7  -3   25.05    0.62 
  -1   7   3   25.54    0.64 
  -1   7   3   24.99    0.74 
   1   8   3   29.34    0.69 
   1  -8  -3   29.01    0.76 
   1  -8  -3   29.33    0.79 
   1   8   3   28.86    0.69 
   1   8   3   28.82    0.77 
   1   8   3   28.12    0.81 
   1   8   3   28.43    0.70 
   1   8   3   28.55    0.78 
   1   8   3   28.67    0.70 
  -1   8   3   28.82    0.74 
  -1   8   3   29.06    0.73 
  -1   8   3   28.67    0.80 
  -1   8   3   30.35    0.85 
  -1   8   3   29.49    0.73 
   1   9   3   22.82    0.57 
   1  -9  -3   22.68    0.66 
   1   9   3   22.58    0.64 
   1   9   3   22.63    0.66 
   1   9   3   22.91    0.56 
   1   9   3   23.05    0.70 
  -1   9   3   23.19    0.60 
  -1   9   3   23.92    0.74 
  -1   9   3   23.95    0.63 
  -1   9   3   23.13    0.69 
  -1   9   3   23.46    0.62 
  -1   9   3   23.94    0.60 
   1  10   3    0.32    0.06 
   1  10   3    0.10    0.11 
   1  10   3    0.24    0.10 
   1  10   3    0.21    0.08 
   1  10   3    0.20    0.04 
   1 -10  -3    0.14    0.10 
  -1  10   3    0.14    0.06 
  -1  10   3    0.20    0.06 
  -1  10   3    0.33    0.13 
  -1  10   3    0.20    0.08 
  -1  10   3    0.16    0.12 
  -1  10   3    0.30    0.08 
   1  11   3   50.64    1.22 
   1  11   3   51.82    1.40 
   1  11   3   51.61    1.31 
   1 -11  -3   50.95    1.34 
   1  11   3   51.11    1.35 
   1  11   3   50.87    1.24 
  -1  11   3   52.97    1.39 
  -1  11   3   51.86    1.43 
  -1  11   3   51.36    1.27 
  -1  11   3   51.93    1.29 
  -1  11   3   50.57    1.24 
  -1  11   3   50.27    1.27 
   1  12   3    8.27    0.25 
   1  12   3    8.12    0.43 
   1  12   3    8.44    0.28 
   1  12   3    8.41    0.33 
   1  12   3    7.68    0.39 
  -1  12   3    8.37    0.29 
  -1  12   3    8.33    0.25 
  -1  12   3    8.87    0.43 
  -1  12   3    8.20    0.30 
  -1  12   3    8.61    0.47 
   1  13   3    2.83    0.34 
   1  13   3    2.92    0.23 
   1  13   3    2.96    0.15 
   1  13   3    2.91    0.32 
  -1  13   3    3.00    0.29 
  -1  13   3    2.69    0.13 
  -1  13   3    2.49    0.31 
  -1  13   3    2.81    0.16 
  -1  13   3    3.02    0.22 
   1  14   3    7.82    0.36 
   1  14   3    7.70    0.46 
   1  14   3    7.77    0.28 
   1  14   3    7.89    0.50 
  -1  14   3    7.52    0.48 
  -1  14   3    8.33    0.54 
  -1  14   3    7.79    0.35 
   1  15   3    1.60    0.20 
   1  15   3    2.03    0.22 
   1  15   3    1.94    0.29 
   1  15   3    1.61    0.31 
  -1  15   3    1.56    0.29 
  -1  15   3    2.39    0.36 
  -1  15   3    1.61    0.32 
   1  16   3    1.77    0.35 
   1  16   3    2.06    0.34 
   1  16   3    2.07    0.23 
  -1  16   3    2.29    0.37 
  -1  16   3    1.88    0.24 
  -1  16   3    1.94    0.37 
   1  17   3    4.94    0.49 
   1  17   3    6.21    0.44 
  -1  17   3    6.23    0.44 
  -1  17   3    5.29    0.51 
   2  16  -3    7.11    0.63 
   2  16  -3    7.21    0.35 
   2  16  -3    7.50    0.63 
  -2  16  -3    6.67    0.52 
  -2  16  -3    7.95    0.36 
  -2  16  -3    8.23    0.68 
  -2  16  -3    6.81    0.73 
   2  15  -3   19.57    0.80 
   2  15  -3   20.21    0.57 
   2  15  -3   19.61    0.84 
   2  15  -3   19.44    0.64 
   2  15  -3   19.38    0.57 
  -2  15  -3   19.21    0.61 
  -2  15  -3   19.15    0.54 
  -2  15  -3   19.54    0.70 
  -2  15  -3   19.89    0.70 
  -2  15  -3   18.39    0.88 
  -2  15  -3   17.64    0.83 
   2  14  -3    0.52    0.22 
   2  14  -3    0.26    0.10 
   2  14  -3    0.74    0.23 
   2  14  -3    0.32    0.10 
  -2  14  -3    0.20    0.17 
  -2  14  -3    0.65    0.25 
  -2  14  -3    0.05    0.17 
  -2  14  -3    0.38    0.13 
  -2  14  -3    0.26    0.14 
   2  13  -3    3.18    0.34 
   2  13  -3    3.68    0.19 
   2  13  -3    3.49    0.18 
  -2  13  -3    3.48    0.29 
  -2  13  -3    2.52    0.36 
  -2  13  -3    3.41    0.18 
  -2  13  -3    3.27    0.38 
  -2  13  -3    3.51    0.28 
   2  12  -3    6.84    0.23 
   2  12  -3    6.61    0.24 
   2  12  -3    5.93    0.57 
  -2  12  -3    6.81    0.25 
  -2  12  -3    6.60    0.32 
  -2  12  -3    6.80    0.34 
  -2  12  -3    6.67    0.33 
  -2  12  -3    6.58    0.42 
   2  11  -3    6.43    0.21 
   2  11  -3    6.59    0.35 
   2  11  -3    6.60    0.22 
  -2  11  -3    6.14    0.24 
  -2  11  -3    6.46    0.32 
  -2  11  -3    6.23    0.29 
  -2  11  -3    6.12    0.30 
  -2  11  -3    5.83    0.37 
   2  10  -3    6.59    0.19 
   2  10  -3    6.30    0.20 
   2  10  -3    6.54    0.31 
   2 -10   3    5.86    0.28 
   2  10  -3    6.27    0.21 
  -2  10  -3    6.06    0.35 
  -2  10  -3    6.28    0.28 
  -2  10  -3    5.76    0.23 
  -2  10  -3    5.92    0.26 
  -2 -10   3    5.94    0.20 
   2  -9   3   49.73    1.43 
   2   9  -3   54.32    1.27 
   2   9  -3   53.63    1.27 
   2   9  -3   54.62    1.27 
   2   9  -3   52.61    1.37 
  -2   9  -3   52.70    1.32 
  -2   9  -3   53.80    1.35 
  -2   9  -3   52.77    1.33 
  -2  -9   3   53.27    1.28 
  -2   9  -3   53.06    1.42 
   2  -8   3   10.23    0.38 
   2   8  -3   10.78    0.29 
   2   8  -3    9.31    0.34 
   2   8  -3   10.71    0.29 
   2   8  -3   10.74    0.37 
  -2   8  -3   11.14    0.36 
  -2   8  -3   11.18    0.34 
  -2   8  -3   10.93    0.34 
  -2  -8   3   10.68    0.30 
  -2   8  -3   11.03    0.41 
   2  -7   3   14.66    0.37 
   2  -7   3   14.52    0.46 
   2   7  -3   14.94    0.39 
   2   7  -3   15.00    0.38 
   2  -7   3   14.14    0.46 
   2   7  -3   15.30    0.37 
   2  -7   3   14.71    0.39 
  -2   7  -3   14.86    0.43 
  -2   7  -3   14.69    0.44 
  -2   7  -3   14.95    0.43 
  -2  -7   3   14.76    0.39 
  -2   7  -3   14.83    0.49 
   2  -6   3    6.90    0.26 
   2  -6   3    6.68    0.20 
   2   6  -3    6.77    0.18 
   2  -6   3    6.63    0.22 
   2   6  -3    6.76    0.20 
   2   6  -3    6.83    0.20 
   2  -6   3    6.93    0.26 
  -2   6  -3    6.88    0.24 
  -2   6  -3    6.63    0.28 
  -2   6  -3    6.63    0.23 
  -2   6  -3    6.61    0.23 
   2   5  -3   80.06    1.85 
   2  -5   3   74.35    1.90 
   2  -5   3   78.12    1.87 
   2   5  -3   78.93    1.84 
   2  -5   3   78.76    1.85 
   2   5  -3   78.16    1.82 
   2  -5   3   78.17    1.91 
  -2   5  -3   78.24    1.88 
  -2   5  -3   79.86    1.89 
  -2   5  -3   77.87    1.89 
  -2   5  -3   78.19    1.92 
   2   4  -3   87.01    2.01 
   2   4  -3   87.04    2.02 
   2  -4   3   87.49    2.07 
   2  -4   3   81.66    2.05 
   2  -4   3   87.28    2.04 
   2  -4   3   84.38    2.06 
   2  -4   3   86.60    2.02 
  -2   4  -3   84.96    2.05 
  -2   4  -3   83.30    2.07 
  -2   4  -3   86.84    2.05 
  -2   4  -3   85.76    2.04 
   2  -3   3   70.54    1.69 
   2   3  -3   72.98    1.68 
   2  -3   3   69.32    1.68 
   2  -3   3   71.88    1.71 
   2   3  -3   71.33    1.68 
   2  -3   3   66.10    1.69 
   2   3  -3   72.48    1.67 
  -2   3  -3   70.35    1.70 
  -2  -3   3   70.64    1.66 
  -2   3  -3   71.47    1.69 
  -2   3  -3   69.19    1.71 
  -2  -3   3   68.64    1.67 
  -2   3  -3   71.97    1.69 
   2   2  -3   12.82    0.34 
   2   2  -3   12.23    0.33 
   2  -2   3   12.79    0.35 
   2  -2   3   11.98    0.36 
   2   2  -3   12.68    0.33 
   2  -2   3   12.29    0.35 
   2  -2   3   12.80    0.34 
  -2   2  -3   12.22    0.35 
  -2  -2   3   13.00    0.31 
  -2  -2   3   12.68    0.33 
  -2  -2   3   12.88    0.34 
  -2   2  -3   12.96    0.35 
  -2  -2   3   13.04    0.34 
  -2   2  -3   12.22    0.35 
  -2   2  -3   13.43    0.35 
   2  -1   3   88.89    2.15 
   2  -1   3   87.39    2.16 
   2  -1   3   92.07    2.14 
   2   1  -3   91.20    2.13 
   2   1  -3   90.34    2.14 
   2   1  -3   88.19    2.13 
   2  -1   3   93.69    2.13 
  -2   1  -3   91.63    2.14 
  -2  -1   3   90.72    2.13 
  -2   1  -3   92.39    2.14 
  -2  -1   3   91.97    2.14 
  -2   1  -3   89.71    2.15 
  -2   1  -3   95.34    2.15 
  -2  -1   3   85.69    2.14 
   2   0   3   20.20    0.48 
   2   0  -3   19.76    0.49 
   2   0  -3   20.16    0.50 
   2   0   3   18.75    0.49 
   2   0   3   19.50    0.50 
   2   0  -3   19.33    0.49 
   2   0   3   19.89    0.50 
   2   0   3   20.17    0.51 
   2   0  -3   18.74    0.50 
  -2   0   3   19.57    0.50 
  -2   0  -3   19.97    0.50 
  -2   0  -3   20.40    0.48 
  -2   0  -3   18.88    0.50 
  -2   0  -3   18.29    0.49 
  -2   0   3   18.13    0.50 
  -2   0  -3   18.73    0.49 
  -2   0   3   19.53    0.49 
   2  -1  -3   89.34    2.18 
   2   1   3   93.05    2.17 
   2  -1  -3   88.27    2.16 
   2   1   3   91.79    2.16 
   2  -1  -3   96.48    2.18 
   2   1   3   93.89    2.17 
   2  -1  -3   92.55    2.17 
   2   1   3   93.56    2.16 
   2   1   3   93.82    2.15 
  -2  -1  -3   93.66    2.16 
  -2  -1  -3   89.87    2.13 
  -2  -1  -3   86.49    2.16 
  -2   1   3   94.21    2.17 
  -2   1   3   93.68    2.17 
  -2  -1  -3   88.77    2.16 
  -2  -1  -3   91.63    2.16 
  -2   1   3   90.52    2.17 
  -2   1   3   89.23    2.17 
   2  -2  -3   12.76    0.37 
   2  -2  -3   13.24    0.36 
   2   2   3   12.70    0.34 
   2   2   3   12.68    0.33 
   2  -2  -3   13.10    0.34 
   2   2   3   13.21    0.34 
   2  -2  -3   12.06    0.36 
   2   2   3   12.45    0.34 
  -2  -2  -3   12.64    0.33 
  -2   2   3   12.56    0.34 
  -2   2   3   12.68    0.35 
  -2  -2  -3   12.89    0.33 
  -2  -2  -3   12.80    0.34 
  -2   2   3   11.82    0.36 
  -2   2   3   12.87    0.36 
  -2  -2  -3   12.07    0.34 
   2  -3  -3   67.90    1.71 
   2   3   3   70.93    1.67 
   2  -3  -3   71.23    1.68 
   2  -3  -3   72.69    1.72 
   2   3   3   69.87    1.69 
   2  -3  -3   72.85    1.73 
   2   3   3   72.15    1.68 
   2   3   3   71.91    1.64 
   2   3   3   73.21    1.69 
  -2   3   3   70.80    1.71 
  -2   3   3   69.68    1.69 
  -2  -3  -3   71.83    1.69 
  -2   3   3   67.35    1.70 
  -2  -3  -3   69.19    1.69 
  -2  -3  -3   71.50    1.67 
  -2   3   3   69.93    1.72 
   2   4   3   80.15    2.03 
   2   4   3   88.90    2.01 
   2   4   3   87.66    2.00 
   2  -4  -3   85.69    2.06 
   2  -4  -3   86.31    2.03 
   2  -4  -3   86.11    2.02 
   2  -4  -3   84.92    2.06 
   2   4   3   88.59    2.04 
   2  -4  -3   84.45    2.09 
   2   4   3   77.32    2.01 
  -2  -4  -3   85.42    2.05 
  -2   4   3   88.15    2.03 
  -2   4   3   84.99    2.08 
  -2   4   3   86.87    2.06 
  -2  -4  -3   87.47    2.00 
  -2   4   3   86.79    2.05 
   2  -5  -3   76.47    1.87 
   2   5   3   77.47    1.84 
   2  -5  -3   77.81    1.88 
   2   5   3   78.30    1.79 
   2  -5  -3   76.78    1.81 
   2   5   3   78.52    1.81 
   2  -5  -3   77.27    1.82 
   2   5   3   75.50    1.85 
   2   5   3   77.84    1.82 
  -2  -5  -3   77.72    1.80 
  -2   5   3   77.97    1.84 
  -2  -5  -3   76.49    1.87 
  -2   5   3   71.63    1.89 
  -2   5   3   76.30    1.85 
  -2   5   3   76.72    1.87 
   2   6   3    6.09    0.22 
   2   6   3    6.55    0.18 
   2  -6  -3    6.23    0.18 
   2  -6  -3    6.43    0.19 
   2   6   3    6.26    0.24 
   2   6   3    6.49    0.21 
   2  -6  -3    6.27    0.25 
   2  -6  -3    6.26    0.24 
  -2  -6  -3    6.59    0.18 
  -2   6   3    6.66    0.22 
  -2   6   3    6.75    0.29 
  -2  -6  -3    6.70    0.26 
  -2   6   3    6.50    0.23 
  -2   6   3    6.56    0.26 
   2   7   3   15.24    0.42 
   2  -7  -3   14.31    0.46 
   2   7   3   15.38    0.36 
   2   7   3   14.93    0.43 
   2   7   3   14.36    0.45 
   2  -7  -3   14.81    0.45 
  -2   7   3   13.88    0.49 
  -2   7   3   14.51    0.42 
  -2   7   3   14.25    0.47 
  -2   7   3   14.49    0.41 
   2   8   3   11.02    0.35 
   2   8   3   10.74    0.38 
   2   8   3   11.09    0.35 
   2  -8  -3   11.27    0.39 
  -2   8   3   10.85    0.36 
  -2   8   3   11.05    0.43 
  -2   8   3   10.68    0.33 
  -2   8   3   10.65    0.34 
  -2   8   3   10.36    0.39 
   2   9   3   53.19    1.33 
   2  -9  -3   50.15    1.37 
   2   9   3   52.21    1.37 
   2   9   3   52.36    1.32 
  -2   9   3   53.02    1.34 
  -2   9   3   53.51    1.43 
  -2   9   3   51.70    1.38 
  -2   9   3   53.67    1.31 
  -2   9   3   53.17    1.30 
   2  10   3    5.79    0.25 
   2  10   3    5.51    0.31 
   2  10   3    5.82    0.29 
   2 -10  -3    6.64    0.31 
  -2  10   3    6.47    0.25 
  -2  10   3    6.46    0.37 
  -2  10   3    5.95    0.32 
  -2  10   3    6.07    0.26 
  -2  10   3    6.23    0.24 
   2  11   3    6.25    0.27 
   2 -11  -3    6.72    0.33 
   2  11   3    6.02    0.32 
   2  11   3    6.08    0.35 
  -2  11   3    6.36    0.36 
  -2  11   3    6.27    0.25 
  -2  11   3    6.06    0.27 
  -2  11   3    6.56    0.40 
  -2  11   3    6.23    0.27 
   2  12   3    6.55    0.22 
   2  12   3    6.49    0.39 
   2  12   3    6.45    0.19 
   2  12   3    6.85    0.30 
   2  12   3    7.09    0.36 
   2 -12  -3    6.88    0.36 
  -2  12   3    6.53    0.28 
  -2  12   3    7.46    0.41 
  -2  12   3    6.71    0.26 
  -2  12   3    7.03    0.30 
  -2  12   3    6.93    0.44 
   2  13   3    4.29    0.50 
   2  13   3    3.29    0.25 
   2  13   3    3.78    0.14 
   2  13   3    4.33    0.34 
  -2  13   3    3.80    0.37 
  -2  13   3    3.80    0.27 
  -2  13   3    3.90    0.24 
  -2  13   3    3.92    0.19 
  -2  13   3    3.77    0.41 
   2  14   3    0.37    0.08 
   2  14   3    0.72    0.22 
   2  14   3    0.33    0.14 
   2  14   3    0.23    0.20 
  -2  14   3    0.36    0.09 
  -2  14   3    0.30    0.11 
  -2  14   3    0.63    0.24 
  -2  14   3    0.05    0.15 
  -2  14   3    0.31    0.25 
   2  15   3   19.45    0.78 
   2  15   3   19.08    0.64 
   2  15   3   18.41    0.74 
  -2  15   3   19.40    0.65 
  -2  15   3   18.97    0.52 
  -2  15   3   18.99    0.79 
  -2  15   3   18.89    0.86 
   2  16   3    8.13    0.58 
   2  16   3    7.45    0.59 
   2  16   3    7.39    0.42 
  -2  16   3    7.42    0.69 
  -2  16   3    7.29    0.63 
   3  16  -3    2.14    0.36 
   3  16  -3    1.93    0.37 
  -3  16  -3    1.97    0.41 
  -3  16  -3    1.75    0.39 
  -3  16  -3    2.20    0.25 
  -3  16  -3    2.18    0.34 
  -3  16  -3    2.08    0.36 
   3  15  -3   11.27    0.38 
   3  15  -3   11.40    0.39 
   3  15  -3   11.12    0.63 
   3  15  -3   11.87    0.64 
  -3  15  -3   11.73    0.69 
  -3  15  -3   11.21    0.56 
  -3  15  -3   11.80    0.56 
  -3  15  -3   11.59    0.50 
  -3  15  -3   10.69    0.73 
   3  14  -3   14.84    0.44 
   3  14  -3   14.66    0.67 
   3  14  -3   15.04    0.46 
   3  14  -3   14.87    0.65 
  -3  14  -3   15.76    0.61 
  -3  14  -3   15.98    0.60 
  -3  14  -3   15.25    0.70 
  -3  14  -3   15.43    0.48 
  -3  14  -3   15.86    0.58 
   3  13  -3   10.94    0.36 
   3  13  -3   11.73    0.34 
   3  13  -3   10.89    0.55 
   3  13  -3   11.98    0.53 
  -3  13  -3   11.33    0.48 
  -3  13  -3   11.18    0.59 
  -3  13  -3   11.62    0.47 
  -3  13  -3   10.90    0.48 
  -3  13  -3   11.62    0.39 
   3  12  -3   27.59    0.70 
   3  12  -3   27.05    0.68 
  -3  12  -3   27.28    0.80 
  -3  12  -3   23.68    0.89 
  -3  12  -3   26.96    0.74 
  -3  12  -3   27.49    0.81 
  -3  12  -3   27.22    0.90 
   3  11  -3    7.64    0.37 
   3  11  -3    7.62    0.25 
   3  11  -3    7.88    0.24 
  -3  11  -3    7.46    0.30 
  -3  11  -3    7.19    0.36 
  -3  11  -3    7.58    0.34 
  -3  11  -3    7.58    0.34 
  -3  11  -3    7.32    0.42 
   3  10  -3   10.58    0.31 
   3  10  -3   10.91    0.30 
   3  10  -3   10.55    0.41 
  -3  10  -3   10.32    0.43 
  -3  10  -3   10.72    0.39 
  -3  10  -3   10.77    0.37 
  -3  10  -3   10.68    0.46 
  -3  10  -3   10.19    0.44 
   3   9  -3    8.56    0.25 
   3   9  -3    8.75    0.26 
   3  -9   3    8.51    0.22 
   3   9  -3    8.66    0.25 
   3  -9   3    8.84    0.38 
   3  -9   3    9.10    0.36 
  -3  -9   3    8.27    0.24 
  -3   9  -3    8.92    0.32 
  -3   9  -3    8.46    0.33 
  -3   9  -3    8.34    0.33 
  -3   9  -3    9.01    0.40 
   3   8  -3   75.31    1.76 
   3  -8   3   74.13    1.77 
   3  -8   3   74.64    1.76 
   3   8  -3   75.61    1.77 
   3  -8   3   75.95    1.88 
   3   8  -3   74.55    1.76 
   3  -8   3   72.87    1.87 
  -3  -8   3   75.53    1.76 
  -3   8  -3   74.25    1.85 
  -3   8  -3   74.98    1.84 
  -3   8  -3   74.70    1.83 
  -3   8  -3   71.07    1.90 
   3   7  -3   11.16    0.31 
   3  -7   3   11.07    0.40 
   3  -7   3   11.24    0.31 
   3  -7   3   11.02    0.40 
   3   7  -3   10.85    0.29 
   3  -7   3   10.97    0.33 
   3   7  -3   11.09    0.30 
  -3   7  -3   10.65    0.36 
  -3   7  -3   11.41    0.42 
  -3   7  -3   11.29    0.37 
  -3  -7   3   10.89    0.30 
  -3   7  -3   11.03    0.37 
   3  -6   3   24.90    0.69 
   3  -6   3   25.85    0.64 
   3  -6   3   25.04    0.71 
   3   6  -3   25.55    0.64 
   3   6  -3   25.31    0.61 
   3   6  -3   25.51    0.62 
   3  -6   3   25.64    0.66 
  -3   6  -3   23.78    0.71 
  -3   6  -3   24.04    0.68 
  -3   6  -3   23.99    0.68 
  -3   6  -3   23.99    0.67 
   3  -5   3   11.95    0.34 
   3   5  -3   12.02    0.34 
   3  -5   3   11.98    0.38 
   3  -5   3   11.82    0.36 
   3   5  -3   11.57    0.31 
   3  -5   3   12.22    0.40 
   3   5  -3   11.98    0.33 
  -3   5  -3   11.90    0.37 
  -3   5  -3   11.78    0.40 
  -3   5  -3   11.82    0.37 
  -3   5  -3   12.03    0.37 
   3   4  -3   52.05    1.23 
   3   4  -3   52.11    1.22 
   3  -4   3   50.90    1.28 
   3  -4   3   47.61    1.26 
   3  -4   3   48.94    1.26 
   3  -4   3   50.26    1.25 
   3   4  -3   52.77    1.22 
   3  -4   3   49.40    1.23 
  -3  -4   3   51.99    1.18 
  -3   4  -3   52.08    1.26 
  -3   4  -3   46.88    1.27 
  -3   4  -3   51.14    1.26 
  -3   4  -3   48.80    1.25 
  -3  -4   3   51.59    1.21 
   3   3  -3  130.43    2.98 
   3  -3   3  127.36    2.98 
   3  -3   3  129.87    3.00 
   3   3  -3  129.68    2.95 
   3   3  -3  129.62    2.97 
   3  -3   3  125.75    3.00 
   3  -3   3  125.28    3.02 
   3   3  -3  128.79    2.94 
  -3   3  -3  129.82    3.00 
  -3   3  -3  127.05    3.00 
  -3  -3   3  126.08    2.94 
  -3   3  -3  117.94    3.00 
  -3  -3   3  126.74    2.95 
  -3  -3   3  112.76    2.98 
  -3   3  -3  126.20    2.99 
   3   2  -3    9.88    0.26 
   3  -2   3    9.56    0.28 
   3  -2   3    9.56    0.31 
   3  -2   3    9.68    0.30 
   3  -2   3    9.47    0.28 
   3   2  -3    9.68    0.27 
   3   2  -3    9.39    0.28 
  -3  -2   3    9.54    0.26 
  -3  -2   3    8.96    0.27 
  -3   2  -3    9.05    0.29 
  -3   2  -3    8.93    0.28 
  -3  -2   3    9.13    0.25 
  -3   2  -3    9.21    0.29 
  -3  -2   3    8.60    0.27 
  -3   2  -3    8.77    0.29 
   3  -1   3  182.59    4.25 
   3   1  -3  178.85    4.25 
   3   1  -3  184.95    4.26 
   3  -1   3  183.23    4.23 
   3   1  -3  184.22    4.28 
   3  -1   3  180.22    4.24 
   3  -1   3  181.25    4.26 
  -3  -1   3  177.30    4.22 
  -3  -1   3  182.00    4.24 
  -3   1  -3  180.53    4.25 
  -3   1  -3  180.72    4.24 
  -3  -1   3  180.39    4.25 
  -3   1  -3  176.39    4.23 
  -3   1  -3  178.23    4.24 
  -3  -1   3  181.90    4.23 
   3   0  -3  179.04    4.47 
   3   0  -3  193.91    4.49 
   3   0   3  193.46    4.47 
   3   0   3  189.86    4.49 
   3   0   3  195.16    4.53 
   3   0   3  183.21    4.48 
   3   0  -3  193.26    4.46 
   3   0  -3  197.05    4.51 
  -3   0  -3  187.99    4.48 
  -3   0   3  200.81    4.48 
  -3   0   3  189.34    4.48 
  -3   0  -3  185.53    4.47 
  -3   0  -3  194.95    4.45 
  -3   0  -3  194.88    4.48 
  -3   0   3  185.37    4.45 
  -3   0  -3  195.63    4.54 
   3  -1  -3  178.06    4.22 
   3  -1  -3  180.57    4.24 
   3   1   3  181.98    4.20 
   3  -1  -3  178.78    4.23 
   3  -1  -3  187.17    4.25
[truncated: 1,407,846 more chars]
